# Supplementary material for: Multi-environment QTL mapping identifies major genetic loci influencing soybean main stem node architecture
Source: PeerJ. 2024 Nov 26;12:e18539. doi: 10.7717/peerj.18539 (PMC11606317; doi:10.7717/peerj.18539)
Supplement: Supplemental Information 1 [file peerj-12-18539-s001.xlsx]

## Sheet: GeneralInfo
1	Indicator: 1 for mapping; 2 for simulation
4	Mapping Population Type
2	Mapping Function (1 for Kosambi; 2 for Haldane; 3 for Morgan)
2	Marker Space Type (1 for intervals; 2 for positions)
1	Marker Space Unit(1 for centiMorgan; 2 for Morgan)
20	Number of Chromosomes (or Linkage Groups)
234	Size of the mapping population
8	Number of traits

## Sheet: Chromosome
Ch1	437
Ch2	388
Ch3	489
Ch4	722
Ch5	157
Ch6	158
Ch7	290
Ch8	212
Ch9	663
Ch10	692
Ch11	117
Ch12	194
Ch13	328
Ch14	185
Ch15	583
Ch16	521
Ch17	644
Ch18	660
Ch19	167
Ch20	471

## Sheet: LinkageMap
Marker376272	1	0
Marker490516	1	0
Marker362998	1	0
Marker399295	1	0
Marker376129	1	0
Marker461181	1	0
Marker395506	1	2.537
Marker370776	1	2.751
Marker484841	1	2.751
Marker380511	1	3.186
Marker479028	1	3.633
Marker457401	1	3.633
Marker372941	1	3.859
Marker473249	1	3.859
Marker404224	1	4.541
Marker444603	1	4.767
Marker378961	1	15.5
Marker361917	1	15.742
Marker409709	1	15.969
Marker430912	1	16.618
Marker420917	1	17.488
Marker456370	1	19.324
Marker425856	1	20.031
Marker417977	1	29.464
Marker373133	1	29.695
Marker382132	1	29.955
Marker481163	1	30.65
Marker369696	1	30.65
Marker391190	1	30.65
Marker426203	1	30.879
Marker403422	1	32.016
Marker443363	1	32.704
Marker486569	1	33.171
Marker471859	1	34.11
Marker417558	1	34.11
Marker464155	1	34.326
Marker440296	1	35.696
Marker402097	1	37.098
Marker472424	1	37.098
Marker394853	1	38.267
Marker389332	1	38.723
Marker399061	1	38.945
Marker419330	1	38.945
Marker411413	1	39.165
Marker453311	1	39.384
Marker473916	1	39.384
Marker412454	1	39.645
Marker378656	1	39.645
Marker357166	1	40.321
Marker461001	1	40.321
Marker365387	1	44.497
Marker435978	1	44.764
Marker457066	1	45.327
Marker489484	1	45.722
Marker464207	1	45.893
Marker358819	1	45.893
Marker395025	1	47.283
Marker410230	1	47.764
Marker404360	1	48.279
Marker464330	1	48.55
Marker435265	1	48.778
Marker435814	1	49.302
Marker435178	1	49.7
Marker422845	1	49.967
Marker444874	1	49.967
Marker477934	1	50.412
Marker458297	1	50.645
Marker411416	1	51.104
Marker474883	1	51.67
Marker405419	1	51.841
Marker429045	1	51.841
Marker359770	1	52.268
Marker440589	1	53.259
Marker457281	1	53.564
Marker459936	1	54.261
Marker470473	1	55.13
Marker410193	1	55.743
Marker419305	1	56.387
Marker446566	1	56.815
Marker428360	1	57.498
Marker432372	1	58.14
Marker456617	1	58.396
Marker385333	1	58.781
Marker393969	1	59.464
Marker440245	1	60.148
Marker432243	1	60.747
Marker393383	1	61.345
Marker478552	1	61.815
Marker430791	1	62.413
Marker483623	1	63.012
Marker474689	1	63.482
Marker408214	1	64.166
Marker420396	1	64.853
Marker376793	1	65.323
Marker443616	1	65.665
Marker358088	1	66.05
Marker432462	1	66.391
Marker471591	1	66.776
Marker487979	1	67.032
Marker490890	1	67.417
Marker477068	1	67.759
Marker357735	1	68.101
Marker362917	1	68.656
Marker484070	1	69.212
Marker437969	1	69.682
Marker465793	1	69.81
Marker462050	1	69.939
Marker367799	1	70.323
Marker455432	1	70.58
Marker423076	1	70.836
Marker421925	1	71.007
Marker483723	1	71.263
Marker398995	1	71.733
Marker486645	1	72.118
Marker436872	1	72.374
Marker367722	1	72.631
Marker428396	1	72.887
Marker372137	1	73.144
Marker410523	1	73.4
Marker384412	1	73.657
Marker444556	1	73.913
Marker437656	1	74.041
Marker456676	1	74.298
Marker453446	1	74.554
Marker359909	1	74.725
Marker376420	1	74.981
Marker365932	1	75.238
Marker363779	1	75.409
Marker360509	1	75.537
Marker443675	1	75.793
Marker392202	1	75.922
Marker410857	1	76.178
Marker372997	1	76.648
Marker381498	1	77.033
Marker362380	1	77.161
Marker390921	1	77.417
Marker453006	1	77.545
Marker451426	1	77.674
Marker418077	1	77.674
Marker426579	1	77.973
Marker460933	1	78.448
Marker419621	1	79.046
Marker485587	1	79.687
Marker469032	1	80.375
Marker425994	1	80.545
Marker369701	1	80.774
Marker451072	1	81.073
Marker369341	1	81.586
Marker421538	1	81.757
Marker416251	1	81.757
Marker474825	1	82.056
Marker467582	1	82.312
Marker406115	1	82.825
Marker477742	1	83.466
Marker394413	1	83.594
Marker451264	1	83.594
Marker365478	1	83.765
Marker424062	1	84.278
Marker420577	1	85.005
Marker473163	1	85.774
Marker358078	1	86.073
Marker480873	1	86.073
Marker364416	1	86.073
Marker440781	1	86.073
Marker454968	1	86.244
Marker370312	1	86.244
Marker466959	1	86.244
Marker377956	1	86.244
Marker417222	1	86.244
Marker460399	1	86.5
Marker451414	1	86.5
Marker417666	1	86.5
Marker451538	1	86.5
Marker489547	1	86.5
Marker479265	1	86.763
Marker407714	1	86.763
Marker359659	1	86.763
Marker376270	1	86.891
Marker475880	1	87.019
Marker364158	1	87.147
Marker471768	1	87.532
Marker459842	1	88.173
Marker390598	1	89.264
Marker388749	1	90.077
Marker411561	1	90.419
Marker408304	1	90.761
Marker372559	1	91.231
Marker461243	1	91.359
Marker447890	1	91.616
Marker359271	1	92.001
Marker419150	1	92.688
Marker443226	1	93.158
Marker455613	1	93.415
Marker408916	1	93.543
Marker477150	1	94.269
Marker415374	1	95.081
Marker388898	1	95.893
Marker472461	1	96.363
Marker365140	1	96.962
Marker383717	1	97.988
Marker442969	1	99.058
Marker368100	1	99.528
Marker440896	1	99.699
Marker375612	1	99.699
Marker432061	1	99.699
Marker454481	1	100.087
Marker380777	1	100.429
Marker370971	1	100.686
Marker391768	1	101.028
Marker476142	1	101.498
Marker427014	1	101.669
Marker426555	1	102.273
Marker456227	1	102.956
Marker385470	1	103.469
Marker412675	1	103.857
Marker445837	1	103.857
Marker363915	1	104.028
Marker456270	1	104.285
Marker408786	1	104.883
Marker486451	1	105.396
Marker487474	1	105.524
Marker425467	1	106.037
Marker440378	1	106.55
Marker444758	1	107.148
Marker443658	1	107.533
Marker478257	1	107.917
Marker471600	1	108.516
Marker399751	1	109.114
Marker455317	1	109.627
Marker491353	1	109.627
Marker472452	1	109.852
Marker435604	1	109.852
Marker369368	1	110.151
Marker440557	1	110.408
Marker447755	1	110.408
Marker488229	1	110.677
Marker378179	1	111.019
Marker448211	1	111.403
Marker473264	1	111.66
Marker412147	1	111.66
Marker442489	1	111.788
Marker483418	1	112.054
Marker439058	1	112.353
Marker481940	1	112.866
Marker454804	1	113.165
Marker453609	1	113.421
Marker393485	1	114.02
Marker427619	1	114.961
Marker455457	1	115.474
Marker368924	1	115.773
Marker417880	1	116.072
Marker445595	1	116.808
Marker386403	1	117.328
Marker468367	1	117.723
Marker400910	1	117.894
Marker479107	1	118.202
Marker385054	1	118.467
Marker382361	1	119.817
Marker491888	1	120.041
Marker372715	1	120.041
Marker439040	1	120.041
Marker394915	1	120.212
Marker387324	1	120.511
Marker478115	1	120.767
Marker405976	1	121.024
Marker404841	1	121.152
Marker469255	1	121.28
Marker426557	1	121.408
Marker390458	1	121.536
Marker445201	1	121.793
Marker452047	1	121.921
Marker420759	1	122.263
Marker382350	1	122.647
Marker489419	1	123.032
Marker424295	1	123.289
Marker366304	1	123.417
Marker383094	1	123.673
Marker435712	1	123.673
Marker440265	1	123.801
Marker427018	1	123.972
Marker397291	1	124.229
Marker424500	1	124.229
Marker369721	1	124.4
Marker405346	1	124.528
Marker465401	1	124.784
Marker379239	1	125.254
Marker450020	1	125.724
Marker383083	1	125.981
Marker368604	1	126.109
Marker447770	1	126.579
Marker464257	1	127.049
Marker489310	1	127.519
Marker411392	1	128.075
Marker389973	1	128.631
Marker410225	1	129.101
Marker454689	1	129.357
Marker476053	1	129.357
Marker375849	1	129.485
Marker390047	1	129.613
Marker367685	1	129.742
Marker399239	1	129.87
Marker376667	1	129.87
Marker487802	1	129.87
Marker357709	1	129.87
Marker460877	1	129.998
Marker441608	1	130.126
Marker437875	1	130.254
Marker453334	1	130.254
Marker427661	1	130.511
Marker425339	1	130.767
Marker460898	1	130.895
Marker413488	1	131.024
Marker357684	1	131.152
Marker466486	1	131.713
Marker472889	1	132.055
Marker434109	1	132.568
Marker387452	1	132.568
Marker488069	1	132.952
Marker470448	1	133.552
Marker396287	1	133.808
Marker410650	1	133.808
Marker491143	1	133.979
Marker481816	1	134.15
Marker477777	1	134.15
Marker444073	1	134.321
Marker411688	1	134.449
Marker473265	1	134.705
Marker455145	1	134.962
Marker398457	1	135.218
Marker363416	1	135.389
Marker443840	1	135.389
Marker389958	1	135.389
Marker358784	1	135.517
Marker414361	1	135.646
Marker421732	1	135.902
Marker365705	1	136.244
Marker401036	1	136.5
Marker406343	1	136.842
Marker439086	1	137.312
Marker414462	1	137.782
Marker404410	1	138.338
Marker467478	1	138.808
Marker407679	1	139.492
Marker416756	1	139.834
Marker410240	1	140.304
Marker478339	1	140.988
Marker441709	1	142.231
Marker430087	1	142.915
Marker364727	1	143.47
Marker451686	1	144.026
Marker454273	1	144.839
Marker454175	1	145.181
Marker489558	1	145.779
Marker476750	1	146.121
Marker463190	1	146.463
Marker411753	1	147.189
Marker450871	1	147.531
Marker432337	1	147.873
Marker449597	1	148.13
Marker459697	1	148.476
Marker371133	1	148.961
Marker394598	1	148.961
Marker415753	1	148.961
Marker427798	1	149.303
Marker461283	1	149.648
Marker464296	1	149.862
Marker489276	1	149.862
Marker457860	1	149.862
Marker402704	1	149.862
Marker455349	1	149.99
Marker447470	1	150.25
Marker394493	1	150.25
Marker445932	1	150.25
Marker483034	1	150.25
Marker486087	1	150.25
Marker400432	1	150.25
Marker390437	1	150.25
Marker484401	1	150.421
Marker427642	1	150.421
Marker393560	1	150.421
Marker439914	1	150.421
Marker380205	1	150.549
Marker415097	1	150.805
Marker393252	1	150.805
Marker376196	1	151.278
Marker393177	1	151.492
Marker430189	1	151.706
Marker362008	1	151.919
Marker396899	1	152.133
Marker423867	1	152.389
Marker409667	1	152.518
Marker375540	1	152.646
Marker412270	1	152.902
Marker447016	1	153.031
Marker489460	1	153.501
Marker378818	1	154.314
Marker371764	1	154.793
Marker358813	1	154.921
Marker435009	1	155.533
Marker490937	1	155.918
Marker394448	1	156.388
Marker460878	1	156.773
Marker442801	1	157.168
Marker471766	1	157.815
Marker426304	1	158.562
Marker411328	1	158.562
Marker391726	1	158.562
Marker487199	1	158.793
Marker396906	1	159.916
Marker407898	1	163.335
Marker400876	1	164.017
Marker464842	1	164.948
Marker482896	1	165.626
Marker478562	1	166.763
Marker374100	1	167.448
Marker425581	1	167.448
Marker423569	1	167.754
Marker450228	1	167.968
Marker478470	1	167.968
Marker381724	1	168.186
Marker456749	1	168.186
Marker430960	1	168.186
Marker426830	1	168.186
Marker457340	1	168.628
Marker463373	1	170.234
Marker387153	1	170.234
Marker395683	1	171.901
Marker369138	1	181.684
Marker386758	1	181.684
Marker428998	1	182.365
Marker377187	1	182.826
Marker481532	1	182.826
Marker437942	1	184.723
Marker422132	1	185.387
Marker358960	1	186.053
Marker436497	1	186.053
Marker490011	1	186.053
Marker106119	2	0
Marker14806	2	0.229
Marker30227	2	0.229
Marker63969	2	0.229
Marker7604	2	0.921
Marker69128	2	6.787
Marker10390	2	7.451
Marker6746	2	7.68
Marker98736	2	7.68
Marker44421	2	7.68
Marker52066	2	8.871
Marker114709	2	9.422
Marker59209	2	10.591
Marker624	2	11.062
Marker36042	2	12.033
Marker33629	2	12.804
Marker54657	2	14.568
Marker50379	2	14.568
Marker50287	2	15.276
Marker34806	2	16.233
Marker86703	2	18.773
Marker84197	2	19.811
Marker72696	2	22.062
Marker117796	2	22.062
Marker50583	2	24.224
Marker9378	2	25.788
Marker18591	2	26.585
Marker87021	2	27.285
Marker57456	2	27.285
Marker8742	2	27.285
Marker48540	2	27.518
Marker35604	2	27.76
Marker79002	2	28.245
Marker72060	2	28.485
Marker26977	2	29.438
Marker76824	2	29.89
Marker9747	2	31.306
Marker86502	2	32.474
Marker40823	2	32.911
Marker17558	2	34.32
Marker101599	2	34.566
Marker68283	2	34.566
Marker40964	2	36.409
Marker53089	2	38.48
Marker2498	2	38.965
Marker42010	2	38.965
Marker117894	2	39.393
Marker73946	2	40.034
Marker53147	2	40.761
Marker83746	2	41.231
Marker85241	2	41.231
Marker13523	2	41.83
Marker67926	2	42.3
Marker19863	2	42.608
Marker93863	2	42.608
Marker101383	2	42.608
Marker86650	2	42.998
Marker81079	2	42.998
Marker8831	2	43.665
Marker113814	2	43.967
Marker20188	2	43.967
Marker92227	2	44.625
Marker63919	2	45.07
Marker45476	2	45.292
Marker25882	2	45.292
Marker58112	2	45.292
Marker106580	2	45.292
Marker66802	2	45.292
Marker79849	2	45.292
Marker116208	2	45.292
Marker43301	2	45.548
Marker73248	2	45.933
Marker97399	2	46.232
Marker51135	2	46.232
Marker7634	2	46.232
Marker19293	2	46.232
Marker63436	2	46.232
Marker60539	2	46.531
Marker96666	2	46.916
Marker63266	2	47.258
Marker42200	2	47.6
Marker76464	2	48.118
Marker58275	2	48.289
Marker18543	2	48.833
Marker38265	2	48.833
Marker51151	2	49.09
Marker117694	2	50.047
Marker114537	2	50.313
Marker82518	2	50.313
Marker110795	2	50.313
Marker83632	2	50.534
Marker17705	2	51.09
Marker45871	2	51.474
Marker29980	2	51.474
Marker46875	2	51.773
Marker4677	2	53.061
Marker117258	2	54.098
Marker65700	2	55.831
Marker105311	2	56.628
Marker21433	2	57.856
Marker56219	2	60.147
Marker109990	2	61.011
Marker47644	2	61.182
Marker26600	2	61.807
Marker24965	2	62.235
Marker46496	2	62.504
Marker10134	2	62.504
Marker96599	2	63.434
Marker44845	2	63.978
Marker85760	2	64.742
Marker56096	2	65.478
Marker93144	2	65.735
Marker64857	2	65.906
Marker56719	2	66.162
Marker74591	2	66.632
Marker44510	2	67.448
Marker63702	2	67.619
Marker11341	2	67.79
Marker57483	2	68.458
Marker114103	2	68.685
Marker89426	2	69.085
Marker2109	2	72.434
Marker112750	2	72.434
Marker101051	2	76.484
Marker15652	2	79.05
Marker32354	2	81.644
Marker27316	2	83.039
Marker94003	2	83.27
Marker64153	2	83.542
Marker3345	2	83.809
Marker63900	2	84.03
Marker39416	2	84.03
Marker57186	2	84.03
Marker79968	2	84.03
Marker58647	2	84.03
Marker58120	2	84.03
Marker12903	2	84.03
Marker48475	2	84.03
Marker105544	2	84.03
Marker30349	2	84.03
Marker25902	2	84.03
Marker114363	2	84.558
Marker58439	2	84.729
Marker3223	2	84.729
Marker110179	2	85.074
Marker37008	2	85.544
Marker33584	2	86.056
Marker94609	2	86.441
Marker20388	2	86.826
Marker55930	2	87.555
Marker71947	2	88.153
Marker50400	2	88.752
Marker6042	2	89.136
Marker39113	2	89.607
Marker11946	2	89.992
Marker103322	2	90.248
Marker77496	2	90.505
Marker80378	2	90.889
Marker102341	2	91.146
Marker21160	2	91.488
Marker81795	2	91.744
Marker28745	2	92
Marker62995	2	92.342
Marker48262	2	92.899
Marker78208	2	93.241
Marker69537	2	93.583
Marker2250	2	93.925
Marker11337	2	94.395
Marker107291	2	94.651
Marker77996	2	94.907
Marker15456	2	95.378
Marker102005	2	95.976
Marker34271	2	96.574
Marker48080	2	97.044
Marker86258	2	97.643
Marker46485	2	98.113
Marker64145	2	98.583
Marker106813	2	99.053
Marker77332	2	99.608
Marker1524	2	100.335
Marker52600	2	100.805
Marker40874	2	101.062
Marker33417	2	101.062
Marker84835	2	101.062
Marker49608	2	101.232
Marker48431	2	101.232
Marker67049	2	101.361
Marker51029	2	101.361
Marker36297	2	101.66
Marker116622	2	102.13
Marker38439	2	102.258
Marker23260	2	102.429
Marker104439	2	102.771
Marker48158	2	103.113
Marker23360	2	103.113
Marker95247	2	103.113
Marker29508	2	103.113
Marker79563	2	103.113
Marker88601	2	103.241
Marker25342	2	103.369
Marker110585	2	103.711
Marker11723	2	104.053
Marker117652	2	104.267
Marker92808	2	104.48
Marker58162	2	104.737
Marker70775	2	104.737
Marker50191	2	104.737
Marker55315	2	104.737
Marker116498	2	104.737
Marker35377	2	104.737
Marker88030	2	104.908
Marker74841	2	105.164
Marker91627	2	105.506
Marker71631	2	105.848
Marker107183	2	106.19
Marker99627	2	106.446
Marker108455	2	106.703
Marker58062	2	107.045
Marker93375	2	107.258
Marker71806	2	107.6
Marker114731	2	108.07
Marker101302	2	108.412
Marker89764	2	108.754
Marker19391	2	108.882
Marker114354	2	109.139
Marker80692	2	109.352
Marker80228	2	109.566
Marker31792	2	109.694
Marker62606	2	110.079
Marker13292	2	110.335
Marker19734	2	110.72
Marker69780	2	111.404
Marker109881	2	111.874
Marker71251	2	112.344
Marker85722	2	113.284
Marker5308	2	114.31
Marker94727	2	115.293
Marker38242	2	116.233
Marker105403	2	116.703
Marker108692	2	117.173
Marker68981	2	117.988
Marker55067	2	118.33
Marker12462	2	118.715
Marker30376	2	119.057
Marker56577	2	119.398
Marker41543	2	119.74
Marker59541	2	120.082
Marker42143	2	120.424
Marker55899	2	121.193
Marker38640	2	121.963
Marker37615	2	122.732
Marker103754	2	123.202
Marker55988	2	123.672
Marker94357	2	124.228
Marker98022	2	124.783
Marker45000	2	125.253
Marker11263	2	125.852
Marker64264	2	126.194
Marker105395	2	126.45
Marker93494	2	127.048
Marker10912	2	127.305
Marker23109	2	127.433
Marker90699	2	127.561
Marker99135	2	127.689
Marker98250	2	127.903
Marker91988	2	128.16
Marker92590	2	128.416
Marker5491	2	128.544
Marker9601	2	128.672
Marker16331	2	128.886
Marker110820	2	129.014
Marker49635	2	129.271
Marker114252	2	129.271
Marker50138	2	129.442
Marker67814	2	129.57
Marker99650	2	129.83
Marker109982	2	129.958
Marker98003	2	130.172
Marker108585	2	130.428
Marker101561	2	130.813
Marker118098	2	131.155
Marker97474	2	131.497
Marker78907	2	131.838
Marker110763	2	132.052
Marker13314	2	132.394
Marker81623	2	132.736
Marker92633	2	133.206
Marker17336	2	133.676
Marker42515	2	134.018
Marker32527	2	134.488
Marker107467	2	134.958
Marker65642	2	135.3
Marker111	2	135.428
Marker78171	2	135.557
Marker108622	2	135.898
Marker92550	2	136.24
Marker72613	2	136.582
Marker43198	2	136.839
Marker97914	2	137.095
Marker107047	2	137.437
Marker30090	2	137.779
Marker17161	2	138.121
Marker36439	2	138.377
Marker8807	2	138.633
Marker30442	2	138.975
Marker63039	2	139.317
Marker45036	2	139.659
Marker44202	2	139.916
Marker18374	2	140.044
Marker8283	2	140.3
Marker40092	2	140.514
Marker12105	2	140.728
Marker3170	2	140.941
Marker88861	2	141.155
Marker71964	2	141.369
Marker22839	2	141.582
Marker28478	2	141.839
Marker22465	2	142.095
Marker40447	2	142.351
Marker96813	2	142.736
Marker41542	2	142.992
Marker72248	2	143.249
Marker47854	2	143.377
Marker87689	2	143.505
Marker113790	2	143.762
Marker85649	2	143.89
Marker41387	2	144.018
Marker96519	2	144.146
Marker35152	2	144.275
Marker36541	2	144.275
Marker12440	2	144.756
Marker11003	2	145.012
Marker89957	2	145.482
Marker38392	2	145.739
Marker106452	2	145.739
Marker2829	2	145.995
Marker111292	2	146.38
Marker39087	2	146.636
Marker39766	2	146.893
Marker117291	2	147.149
Marker98683	2	147.619
Marker71740	2	148.175
Marker83504	2	148.559
Marker1650	2	148.944
Marker81374	2	149.414
Marker26363	2	150.059
Marker5816	2	150.315
Marker102426	2	150.828
Marker38803	2	151.213
Marker25729	2	151.213
Marker65451	2	151.341
Marker40726	2	151.726
Marker80423	2	152.11
Marker7259	2	152.809
Marker40506	2	153.292
Marker67283	2	154.582
Marker20752	2	155.688
Marker31603	2	156.382
Marker57048	2	156.649
Marker68715	2	157.257
Marker94584	2	157.385
Marker102373	2	157.856
Marker88412	2	157.856
Marker67855	2	157.856
Marker30309	2	158.415
Marker47240	2	158.649
Marker5114	2	158.885
Marker45581	2	159.91
Marker114008	2	160.952
Marker86972	2	161.2
Marker80234	2	164.714
Marker79044	2	168.053
Marker90996	2	172.343
Marker34431	2	174.508
Marker115318	2	177.404
Marker104999	2	180.015
Marker74292	2	181.678
Marker38954	2	181.678
Marker104551	2	183.061
Marker46797	2	183.288
Marker70245	2	183.51
Marker102825	2	183.768
Marker77694	2	184.207
Marker53295	2	184.207
Marker48874	2	184.207
Marker15896	2	184.378
Marker75193	2	184.635
Marker2926	2	184.635
Marker2002956	3	0
Marker2071217	3	0.236
Marker2015855	3	0.968
Marker2000372	3	0.968
Marker1992149	3	1.205
Marker2034968	3	1.205
Marker2080734	3	1.528
Marker2032120	3	6.954
Marker2075292	3	7.437
Marker2010762	3	8.394
Marker2057405	3	8.862
Marker2032065	3	9.189
Marker2071346	3	9.517
Marker1998108	3	9.976
Marker2057481	3	10.514
Marker2016197	3	10.837
Marker2039548	3	11.294
Marker2015149	3	11.865
Marker2038606	3	13.886
Marker2067985	3	14.642
Marker2078519	3	15.087
Marker2047921	3	15.532
Marker2022131	3	16.333
Marker2036965	3	20.082
Marker2078097	3	20.082
Marker1997937	3	20.869
Marker2022686	3	21.569
Marker2039467	3	22.014
Marker2074375	3	22.583
Marker2074080	3	22.925
Marker2018981	3	23.224
Marker2025762	3	23.996
Marker2074754	3	25.209
Marker2046131	3	25.854
Marker2056089	3	26.325
Marker2031638	3	26.966
Marker2050713	3	27.466
Marker2067252	3	27.933
Marker1988204	3	28.326
Marker2057072	3	28.589
Marker2010026	3	28.76
Marker2008199	3	29.059
Marker2044240	3	29.447
Marker2034057	3	29.747
Marker2031429	3	29.918
Marker2012706	3	30.303
Marker1995977	3	30.774
Marker1995812	3	31.159
Marker2030384	3	31.634
Marker2057737	3	31.805
Marker2018225	3	31.805
Marker2045826	3	31.805
Marker2047414	3	31.805
Marker2059082	3	31.805
Marker2014865	3	31.976
Marker2073030	3	32.446
Marker2030225	3	33.045
Marker2031100	3	33.986
Marker2004909	3	35.272
Marker2005824	3	36.041
Marker2065982	3	36.298
Marker2015794	3	36.896
Marker2063054	3	37.323
Marker2018861	3	37.494
Marker1993435	3	37.751
Marker2062243	3	37.879
Marker2056237	3	38.135
Marker2022235	3	38.349
Marker2052575	3	38.819
Marker2046583	3	39.332
Marker2041342	3	39.588
Marker2046988	3	39.759
Marker2027257	3	39.759
Marker2078139	3	40.239
Marker2010098	3	40.41
Marker2042041	3	40.794
Marker2071582	3	41.35
Marker2007240	3	41.82
Marker2067407	3	42.076
Marker2004674	3	42.205
Marker2040269	3	42.333
Marker2044078	3	42.589
Marker1990297	3	42.589
Marker2084994	3	42.846
Marker2058799	3	43.102
Marker2001038	3	43.487
Marker2057708	3	43.957
Marker2016664	3	44.427
Marker1996848	3	44.769
Marker2028895	3	44.897
Marker2010959	3	45.153
Marker2024663	3	45.41
Marker2022037	3	45.666
Marker2006061	3	46.008
Marker2045320	3	46.35
Marker2036223	3	46.692
Marker2064120	3	46.948
Marker2014241	3	47.076
Marker2083659	3	47.076
Marker2003674	3	47.205
Marker2060361	3	47.205
Marker2017707	3	47.376
Marker2018899	3	47.376
Marker2085640	3	47.376
Marker2045750	3	47.376
Marker2036271	3	47.504
Marker2087460	3	47.632
Marker2079907	3	47.76
Marker2057045	3	48.017
Marker2021179	3	48.358
Marker2010749	3	48.7
Marker2053006	3	48.914
Marker2039240	3	49.128
Marker1991247	3	49.341
Marker2083469	3	49.598
Marker2031833	3	49.598
Marker2028327	3	49.854
Marker2060532	3	50.239
Marker2011539	3	50.239
Marker2000032	3	50.239
Marker2085702	3	50.495
Marker2053373	3	50.709
Marker2042661	3	50.923
Marker2085878	3	51.179
Marker2053147	3	51.179
Marker2035375	3	51.179
Marker2049021	3	51.179
Marker2042493	3	51.179
Marker2078728	3	51.179
Marker2013178	3	51.179
Marker1995342	3	51.307
Marker2019830	3	51.649
Marker2009505	3	51.777
Marker2051444	3	51.906
Marker2007169	3	52.247
Marker2017869	3	52.418
Marker2064005	3	52.418
Marker2049993	3	52.418
Marker1994284	3	52.418
Marker2012707	3	52.418
Marker2061416	3	52.931
Marker2057192	3	53.401
Marker2018581	3	53.871
Marker2077971	3	54.427
Marker2034293	3	55.025
Marker2079130	3	55.282
Marker2080129	3	55.666
Marker2040426	3	56.136
Marker2036375	3	56.607
Marker2010037	3	56.863
Marker2056248	3	56.991
Marker2080615	3	57.205
Marker2004639	3	57.418
Marker2011060	3	57.632
Marker2079399	3	57.974
Marker2042982	3	58.102
Marker2067623	3	58.23
Marker2005822	3	58.487
Marker1989675	3	58.743
Marker2048643	3	59.085
Marker2009418	3	59.427
Marker2069814	3	59.641
Marker2031432	3	59.854
Marker2041742	3	59.983
Marker2078231	3	59.983
Marker2049499	3	59.983
Marker2012868	3	60.111
Marker2070127	3	60.111
Marker2032383	3	60.367
Marker2033317	3	60.581
Marker2053156	3	60.709
Marker2047310	3	60.709
Marker2018041	3	60.709
Marker2068152	3	60.709
Marker2083384	3	60.709
Marker2082075	3	60.837
Marker2057769	3	61.179
Marker2011318	3	61.521
Marker2044133	3	61.778
Marker2020885	3	61.906
Marker2044161	3	61.906
Marker1998060	3	61.906
Marker2001592	3	61.906
Marker1989672	3	61.906
Marker2015042	3	61.906
Marker2025137	3	61.906
Marker1988829	3	61.906
Marker2035264	3	61.906
Marker2046321	3	61.906
Marker1993626	3	61.906
Marker2046832	3	61.906
Marker2000761	3	62.077
Marker2057885	3	62.333
Marker2054837	3	62.589
Marker2084948	3	62.974
Marker2001865	3	63.231
Marker2026078	3	63.487
Marker2002973	3	63.615
Marker2049482	3	64.004
Marker2059365	3	64.133
Marker2017281	3	64.133
Marker2004315	3	64.133
Marker2072779	3	64.261
Marker2013578	3	64.432
Marker2061387	3	64.432
Marker2045859	3	64.432
Marker2033210	3	64.432
Marker2014486	3	64.432
Marker2073918	3	64.432
Marker2056705	3	64.432
Marker2034617	3	64.432
Marker2014810	3	64.432
Marker2029481	3	64.432
Marker2060059	3	64.432
Marker2023276	3	64.432
Marker2069607	3	64.432
Marker1999570	3	64.432
Marker1999369	3	64.432
Marker2085297	3	64.432
Marker2060849	3	64.688
Marker2043715	3	65.158
Marker2049007	3	65.586
Marker2066254	3	65.586
Marker2044465	3	65.586
Marker2000746	3	65.586
Marker2000918	3	65.586
Marker1996746	3	65.586
Marker2077176	3	65.757
Marker1990248	3	65.757
Marker2051846	3	66.056
Marker2027458	3	66.184
Marker2018155	3	66.184
Marker2030250	3	66.184
Marker2063437	3	66.184
Marker2084355	3	66.74
Marker2012009	3	67.124
Marker2015475	3	67.252
Marker1998501	3	67.509
Marker2034655	3	67.765
Marker2052388	3	68.278
Marker2000536	3	68.582
Marker2062660	3	68.582
Marker2044105	3	68.582
Marker2060735	3	68.838
Marker2039104	3	69.223
Marker2081975	3	69.565
Marker1997047	3	69.821
Marker2067414	3	69.821
Marker2042521	3	69.992
Marker2003739	3	69.992
Marker2014499	3	70.163
Marker2045915	3	70.334
Marker2033508	3	70.633
Marker2004481	3	70.932
Marker2038937	3	71.103
Marker2058957	3	71.103
Marker1999186	3	71.402
Marker2026423	3	71.402
Marker2026079	3	71.402
Marker2007714	3	71.402
Marker2024780	3	71.402
Marker2074074	3	71.402
Marker2085951	3	71.402
Marker2001626	3	71.402
Marker2076276	3	71.402
Marker2076190	3	71.402
Marker2057110	3	71.402
Marker2016264	3	71.573
Marker2013602	3	72.043
Marker2041142	3	72.172
Marker2045658	3	72.343
Marker2057745	3	72.599
Marker2038536	3	72.813
Marker2033120	3	73.069
Marker2039305	3	73.069
Marker2014883	3	73.197
Marker2002927	3	73.454
Marker2031699	3	73.796
Marker1988387	3	74.052
Marker2068550	3	74.052
Marker2072816	3	74.052
Marker2046350	3	74.052
Marker2031219	3	74.223
Marker2002882	3	74.737
Marker2051118	3	75.036
Marker2055414	3	75.164
Marker2066449	3	75.42
Marker2055113	3	75.42
Marker2008542	3	75.954
Marker1995762	3	76.469
Marker2043640	3	76.64
Marker2028791	3	77.49
Marker2034815	3	77.789
Marker1996299	3	78.045
Marker1999341	3	78.216
Marker1993465	3	78.216
Marker2026331	3	78.216
Marker2072680	3	78.515
Marker2074464	3	78.515
Marker2080020	3	78.644
Marker2048217	3	78.644
Marker2039498	3	78.943
Marker2041073	3	79.159
Marker2009650	3	79.159
Marker2063571	3	79.159
Marker2063212	3	79.33
Marker2037420	3	79.33
Marker2045071	3	79.33
Marker2067818	3	79.587
Marker2077834	3	79.843
Marker2023950	3	79.843
Marker2004074	3	80.099
Marker2020437	3	80.228
Marker2008546	3	80.484
Marker2070348	3	80.484
Marker1994401	3	80.74
Marker2021942	3	80.911
Marker1994713	3	81.04
Marker2054122	3	81.339
Marker2071485	3	81.51
Marker2061835	3	81.809
Marker2043929	3	82.279
Marker1989883	3	82.535
Marker1998732	3	82.535
Marker2010031	3	82.792
Marker2008463	3	82.92
Marker2068549	3	83.048
Marker2010899	3	83.352
Marker2052177	3	83.568
Marker1997792	3	83.568
Marker2021366	3	84.215
Marker2027457	3	84.6
Marker2021118	3	85.198
Marker2002065	3	85.754
Marker1989411	3	86.437
Marker2058133	3	86.993
Marker2025136	3	87.463
Marker2036312	3	87.805
Marker2040968	3	88.318
Marker2069545	3	88.446
Marker2058077	3	88.617
Marker2084879	3	88.617
Marker2015646	3	88.617
Marker2033026	3	88.617
Marker2057246	3	88.788
Marker2059364	3	88.959
Marker1988460	3	88.959
Marker2043356	3	88.959
Marker2031253	3	88.959
Marker2005178	3	89.215
Marker2033096	3	89.6
Marker2028958	3	89.942
Marker1994789	3	90.412
Marker2025049	3	91.096
Marker2058310	3	91.096
Marker2065479	3	91.096
Marker2045027	3	91.096
Marker2086879	3	91.096
Marker2080480	3	91.481
Marker2022295	3	91.695
Marker2032568	3	91.695
Marker2016889	3	91.695
Marker2030669	3	91.695
Marker1998962	3	91.866
Marker2057402	3	92.379
Marker2014733	3	92.763
Marker2072358	3	93.02
Marker1989138	3	93.148
Marker2025041	3	93.404
Marker2010349	3	93.661
Marker2016886	3	93.789
Marker2032253	3	94.259
Marker2038466	3	94.729
Marker2054109	3	94.943
Marker2046643	3	95.199
Marker2046259	3	95.199
Marker2072590	3	95.199
Marker2007753	3	95.199
Marker2034938	3	95.456
Marker2000630	3	95.456
Marker2007866	3	95.456
Marker2004761	3	95.884
Marker2022008	3	96.354
Marker2083860	3	96.824
Marker2020587	3	97.294
Marker2014049	3	97.551
Marker2073483	3	97.679
Marker2061284	3	98.063
Marker2034549	3	98.448
Marker1997280	3	98.833
Marker2063982	3	98.961
Marker2082156	3	98.961
Marker2084370	3	99.444
Marker1993658	3	99.615
Marker2068648	3	99.743
Marker2079415	3	100
Marker2070989	3	100.261
Marker2064709	3	100.261
Marker2074752	3	100.261
Marker2017007	3	100.261
Marker2036913	3	100.482
Marker2079043	3	100.482
Marker1994150	3	100.482
Marker2036120	3	100.482
Marker2002060	3	100.482
Marker2001532	3	100.482
Marker2060864	3	100.482
Marker2055314	3	100.482
Marker2010360	3	100.87
Marker2065353	3	100.87
Marker2064029	3	101.041
Marker2037265	3	101.26
Marker2057277	3	101.484
Marker2027540	3	103.713
Marker2084899	3	107.506
Marker2056743	3	107.744
Marker2017706	3	108.425
Marker2082192	3	108.938
Marker1992185	3	111.067
Marker2019280	3	112.138
Marker2030021	3	112.614
Marker2079779	3	113.418
Marker2054185	3	120.44
Marker2082598	3	120.679
Marker2083406	3	120.944
Marker2003513	3	121.438
Marker2060091	3	121.909
Marker2027932	3	122.392
Marker2010659	3	131.418
Marker2078335	3	131.751
Marker2027916	3	132.368
Marker2002828	3	132.539
Marker2042695	3	135.129
Marker2021191	3	135.429
Marker2006823	3	135.642
Marker2084172	3	135.984
Marker2080954	3	136.454
Marker2006616	3	136.454
Marker2029290	3	136.454
Marker2016894	3	136.796
Marker2081492	3	136.796
Marker2041871	3	136.796
Marker2004718	3	137.01
Marker2038002	3	137.01
Marker2012694	3	137.329
Marker2056780	3	137.899
Marker2067935	3	139.067
Marker2038773	3	139.366
Marker2004620	3	139.633
Marker1993204	3	140.061
Marker2009408	3	140.704
Marker2000676	3	141.346
Marker1999205	3	142.639
Marker2024920	3	143.617
Marker2071312	3	143.617
Marker2033952	3	147.301
Marker2043330	3	147.957
Marker2049766	3	148.702
Marker2058741	3	149.673
Marker2003255	3	151.28
Marker2051957	3	152.204
Marker2051289	3	152.737
Marker2036165	3	153.436
Marker2086731	3	153.436
Marker1998116	3	155.925
Marker1997097	3	156.406
Marker2016610	3	156.406
Marker2038984	3	156.577
Marker2012400	3	157.139
Marker2042115	3	158.053
Marker2020087	3	159.84
Marker2009743	3	161.324
Marker2048522	3	162.972
Marker2083728	3	164.118
Marker2039844	3	164.332
Marker2060430	3	169.087
Marker2035058	3	169.3
Marker2062490	3	170.497
Marker2020354	3	171.323
Marker2086772	3	171.323
Marker2079777	3	172.298
Marker2014607	3	177.385
Marker2062954	3	177.556
Marker2049427	3	177.855
Marker2060092	3	178.473
Marker2069288	3	179.371
Marker2036747	3	179.606
Marker2072208	3	179.606
Marker2069564	3	180.172
Marker1709739	4	0
Marker1758729	4	0.764
Marker1756908	4	1.046
Marker1725967	4	3.546
Marker1676304	4	6.459
Marker1727982	4	6.988
Marker1757512	4	7.499
Marker1704840	4	7.894
Marker1676093	4	8.714
Marker1677599	4	8.952
Marker1728448	4	8.952
Marker1757284	4	8.952
Marker1728994	4	9.933
Marker1757563	4	10.876
Marker1750373	4	11.69
Marker1756369	4	12.238
Marker1747130	4	12.238
Marker1707644	4	12.238
Marker1746914	4	13.006
Marker1664255	4	13.556
Marker1689181	4	14.359
Marker1689284	4	15.164
Marker1712136	4	15.964
Marker1693118	4	16.771
Marker1730022	4	18.356
Marker1714764	4	19.325
Marker1687164	4	20.015
Marker1773605	4	20.498
Marker1707708	4	20.84
Marker1692324	4	21.29
Marker1722282	4	21.29
Marker1756848	4	21.29
Marker1686329	4	22.316
Marker1766292	4	22.577
Marker1671548	4	23.827
Marker1769482	4	30.836
Marker1687501	4	37.591
Marker1683183	4	38.526
Marker1779137	4	38.526
Marker1709592	4	43.919
Marker1723611	4	44.812
Marker1705376	4	50.479
Marker1756727	4	56.164
Marker1764979	4	56.493
Marker1761673	4	56.728
Marker1668938	4	56.728
Marker1682260	4	56.978
Marker1753845	4	59.207
Marker1689776	4	65.372
Marker1776782	4	65.372
Marker1716523	4	65.372
Marker1760994	4	65.372
Marker1681493	4	65.372
Marker1742966	4	65.372
Marker1766868	4	65.372
Marker1729707	4	65.372
Marker1704462	4	65.588
Marker1699690	4	65.588
Marker1672672	4	65.588
Marker1674904	4	65.588
Marker1673875	4	65.588
Marker1716393	4	65.846
Marker1695445	4	66.106
Marker1703269	4	66.97
Marker1726552	4	67.141
Marker1760945	4	67.141
Marker1753020	4	67.141
Marker1666344	4	67.141
Marker1737477	4	67.141
Marker1719152	4	67.361
Marker1732971	4	67.532
Marker1773125	4	67.532
Marker1728667	4	67.532
Marker1703850	4	67.703
Marker1671330	4	67.703
Marker1757825	4	67.703
Marker1698468	4	68.002
Marker1725009	4	68.258
Marker1767840	4	68.386
Marker1752414	4	68.557
Marker1715307	4	68.728
Marker1740880	4	68.947
Marker1742048	4	69.118
Marker1703407	4	69.337
Marker1742011	4	69.556
Marker1728457	4	69.556
Marker1735658	4	69.556
Marker1774304	4	69.684
Marker1688782	4	69.684
Marker1777305	4	69.684
Marker1668224	4	69.684
Marker1691972	4	69.684
Marker1710911	4	69.684
Marker1730199	4	69.684
Marker1735226	4	69.684
Marker1747183	4	69.684
Marker1754290	4	69.684
Marker1755063	4	69.684
Marker1755927	4	69.684
Marker1768651	4	69.684
Marker1704562	4	69.684
Marker1725128	4	69.684
Marker1686532	4	69.684
Marker1672431	4	69.684
Marker1686582	4	69.684
Marker1716082	4	69.684
Marker1722248	4	69.684
Marker1717483	4	69.684
Marker1768209	4	69.684
Marker1674865	4	69.684
Marker1772338	4	69.684
Marker1774291	4	69.684
Marker1723847	4	69.944
Marker1727589	4	69.944
Marker1730320	4	69.944
Marker1739921	4	69.944
Marker1773856	4	69.944
Marker1685106	4	69.944
Marker1745842	4	69.944
Marker1731694	4	69.944
Marker1732059	4	70.204
Marker1663664	4	70.204
Marker1741109	4	70.204
Marker1727099	4	70.204
Marker1714200	4	70.204
Marker1692067	4	70.204
Marker1667041	4	70.204
Marker1752061	4	70.462
Marker1667494	4	70.462
Marker1668632	4	70.462
Marker1674215	4	70.462
Marker1759843	4	70.462
Marker1772030	4	70.462
Marker1718524	4	70.462
Marker1674282	4	70.462
Marker1762068	4	70.462
Marker1760242	4	70.462
Marker1738761	4	70.462
Marker1762405	4	70.462
Marker1755104	4	70.462
Marker1765541	4	70.633
Marker1730519	4	70.633
Marker1759886	4	70.804
Marker1750344	4	70.804
Marker1664324	4	70.804
Marker1668440	4	70.804
Marker1721264	4	70.804
Marker1729455	4	70.975
Marker1695309	4	71.103
Marker1738578	4	71.231
Marker1740020	4	71.231
Marker1691511	4	71.231
Marker1724467	4	71.231
Marker1680145	4	71.231
Marker1719211	4	71.359
Marker1682743	4	71.488
Marker1689438	4	71.488
Marker1676837	4	71.488
Marker1713657	4	71.488
Marker1717304	4	71.488
Marker1726375	4	71.488
Marker1761369	4	71.488
Marker1767101	4	71.488
Marker1732168	4	71.488
Marker1720733	4	71.488
Marker1669081	4	71.488
Marker1698394	4	71.488
Marker1724956	4	71.488
Marker1718192	4	71.975
Marker1672798	4	71.975
Marker1763155	4	71.975
Marker1678875	4	72.103
Marker1775265	4	72.359
Marker1725934	4	72.829
Marker1671372	4	73
Marker1667414	4	73
Marker1718042	4	73
Marker1679715	4	73
Marker1703355	4	73
Marker1703248	4	73
Marker1763525	4	73
Marker1678174	4	73
Marker1749788	4	73
Marker1681984	4	73
Marker1759565	4	73.385
Marker1743751	4	73.727
Marker1756525	4	73.983
Marker1745411	4	73.983
Marker1748068	4	73.983
Marker1756016	4	73.983
Marker1761043	4	73.983
Marker1708873	4	73.983
Marker1703826	4	73.983
Marker1758252	4	73.983
Marker1705511	4	73.983
Marker1775426	4	74.373
Marker1689199	4	74.629
Marker1715013	4	74.629
Marker1716087	4	74.885
Marker1673452	4	75.484
Marker1772667	4	76.125
Marker1745682	4	76.424
Marker1750461	4	76.595
Marker1754199	4	76.851
Marker1746162	4	77.321
Marker1761018	4	77.706
Marker1754894	4	77.706
Marker1744290	4	77.706
Marker1709435	4	77.706
Marker1691560	4	77.962
Marker1675025	4	78.219
Marker1676770	4	78.475
Marker1764138	4	78.732
Marker1670015	4	78.732
Marker1673324	4	79.116
Marker1665869	4	79.245
Marker1742167	4	79.415
Marker1688389	4	79.415
Marker1771262	4	79.415
Marker1705339	4	79.415
Marker1753967	4	79.415
Marker1700096	4	79.415
Marker1687231	4	79.415
Marker1723718	4	79.415
Marker1770532	4	79.586
Marker1726659	4	79.843
Marker1716357	4	80.185
Marker1753325	4	80.783
Marker1663415	4	81.168
Marker1699054	4	81.168
Marker1672903	4	81.339
Marker1768776	4	81.467
Marker1721526	4	81.723
Marker1696178	4	82.195
Marker1749602	4	82.323
Marker1755291	4	82.452
Marker1682157	4	82.452
Marker1725120	4	82.623
Marker1707039	4	82.623
Marker1740528	4	82.623
Marker1711416	4	82.879
Marker1765551	4	82.879
Marker1712919	4	82.879
Marker1725308	4	82.879
Marker1748622	4	82.879
Marker1697591	4	82.879
Marker1775154	4	82.879
Marker1692510	4	82.879
Marker1758498	4	82.879
Marker1706068	4	82.879
Marker1748518	4	82.879
Marker1756631	4	82.879
Marker1694747	4	82.879
Marker1771882	4	82.879
Marker1719796	4	82.879
Marker1775060	4	82.879
Marker1667016	4	82.879
Marker1758639	4	82.879
Marker1718541	4	82.879
Marker1666690	4	82.879
Marker1683212	4	83.221
Marker1768823	4	83.477
Marker1679327	4	83.648
Marker1731674	4	83.819
Marker1715154	4	84.076
Marker1761532	4	84.332
Marker1725221	4	84.332
Marker1665481	4	84.332
Marker1722523	4	84.46
Marker1743738	4	84.717
Marker1666072	4	84.845
Marker1731363	4	84.973
Marker1755840	4	85.232
Marker1762499	4	85.403
Marker1754697	4	85.403
Marker1724691	4	85.788
Marker1767890	4	85.916
Marker1713716	4	86.215
Marker1737884	4	86.215
Marker1676472	4	86.215
Marker1667712	4	86.215
Marker1681239	4	86.215
Marker1680971	4	86.215
Marker1762850	4	86.215
Marker1759630	4	86.215
Marker1711273	4	86.215
Marker1757719	4	86.215
Marker1678413	4	86.215
Marker1778241	4	86.215
Marker1734900	4	86.215
Marker1754468	4	86.215
Marker1673124	4	86.215
Marker1675286	4	86.215
Marker1767172	4	86.215
Marker1731996	4	86.215
Marker1710568	4	86.386
Marker1692774	4	86.685
Marker1674664	4	86.685
Marker1684715	4	86.909
Marker1701146	4	86.909
Marker1765534	4	86.909
Marker1775038	4	86.909
Marker1754641	4	86.909
Marker1718709	4	86.909
Marker1725533	4	86.909
Marker1756185	4	86.909
Marker1749147	4	86.909
Marker1722168	4	86.909
Marker1736876	4	87.294
Marker1702949	4	87.465
Marker1711493	4	87.465
Marker1664399	4	87.764
Marker1670258	4	88.149
Marker1775215	4	88.362
Marker1686003	4	88.362
Marker1772654	4	88.362
Marker1719574	4	88.362
Marker1746950	4	88.362
Marker1720728	4	88.362
Marker1772010	4	88.491
Marker1748632	4	88.619
Marker1768807	4	88.79
Marker1676548	4	88.918
Marker1686288	4	88.918
Marker1714677	4	89.046
Marker1768041	4	89.217
Marker1700565	4	89.217
Marker1736244	4	89.217
Marker1758362	4	89.217
Marker1670819	4	89.217
Marker1739253	4	89.217
Marker1763324	4	89.217
Marker1727670	4	89.217
Marker1750901	4	89.217
Marker1688612	4	89.217
Marker1682996	4	89.217
Marker1745030	4	89.217
Marker1713633	4	89.217
Marker1683349	4	89.217
Marker1720430	4	89.217
Marker1680205	4	89.217
Marker1678968	4	89.217
Marker1688934	4	89.217
Marker1759263	4	89.217
Marker1684029	4	89.217
Marker1705926	4	89.388
Marker1765566	4	89.687
Marker1772507	4	89.687
Marker1678678	4	89.687
Marker1696716	4	89.687
Marker1737198	4	89.687
Marker1770243	4	89.687
Marker1766321	4	89.815
Marker1707882	4	90.072
Marker1696625	4	90.243
Marker1676177	4	90.243
Marker1750386	4	90.243
Marker1665963	4	90.243
Marker1706398	4	90.243
Marker1736881	4	90.243
Marker1673346	4	90.243
Marker1716479	4	90.371
Marker1728573	4	90.499
Marker1740948	4	90.499
Marker1687441	4	90.627
Marker1693010	4	90.756
Marker1688537	4	90.884
Marker1711296	4	90.884
Marker1713895	4	90.884
Marker1681543	4	90.884
Marker1682507	4	90.884
Marker1758251	4	90.884
Marker1768227	4	90.884
Marker1672446	4	91.055
Marker1683051	4	91.226
Marker1713984	4	91.482
Marker1677193	4	91.61
Marker1716080	4	91.738
Marker1724762	4	91.867
Marker1668152	4	91.995
Marker1718576	4	92.123
Marker1764267	4	92.251
Marker1756754	4	92.251
Marker1739229	4	92.251
Marker1772585	4	92.251
Marker1741565	4	92.251
Marker1689363	4	92.251
Marker1768147	4	92.251
Marker1720336	4	92.251
Marker1751499	4	92.251
Marker1721402	4	92.251
Marker1760106	4	92.251
Marker1679409	4	92.251
Marker1682652	4	92.251
Marker1687406	4	92.251
Marker1665977	4	92.422
Marker1763748	4	92.422
Marker1689378	4	92.422
Marker1759876	4	92.422
Marker1773078	4	92.422
Marker1670812	4	92.679
Marker1761232	4	92.978
Marker1761080	4	92.978
Marker1725760	4	92.978
Marker1756167	4	93.277
Marker1691872	4	93.277
Marker1752161	4	93.277
Marker1713309	4	93.277
Marker1663974	4	93.277
Marker1746042	4	93.277
Marker1753649	4	93.277
Marker1684311	4	93.277
Marker1679750	4	93.277
Marker1747589	4	93.277
Marker1724847	4	93.277
Marker1681542	4	93.277
Marker1689975	4	93.277
Marker1702898	4	93.277
Marker1684885	4	93.277
Marker1704294	4	93.277
Marker1752154	4	93.277
Marker1745479	4	93.277
Marker1756388	4	93.277
Marker1760361	4	93.277
Marker1718867	4	93.277
Marker1731909	4	93.277
Marker1734474	4	93.277
Marker1710261	4	93.277
Marker1768117	4	93.277
Marker1705181	4	93.277
Marker1756442	4	93.277
Marker1724982	4	93.277
Marker1686753	4	93.277
Marker1737984	4	93.448
Marker1732191	4	93.576
Marker1699632	4	93.576
Marker1743098	4	93.576
Marker1757799	4	93.576
Marker1772863	4	93.576
Marker1693356	4	93.576
Marker1674905	4	93.576
Marker1744470	4	93.576
Marker1761375	4	93.576
Marker1672040	4	93.576
Marker1773772	4	93.576
Marker1724047	4	93.576
Marker1726697	4	93.576
Marker1778326	4	93.576
Marker1741376	4	93.576
Marker1720462	4	93.576
Marker1696637	4	93.576
Marker1707527	4	93.747
Marker1678446	4	93.964
Marker1774408	4	93.964
Marker1664236	4	93.964
Marker1712681	4	93.964
Marker1705870	4	94.353
Marker1689755	4	94.737
Marker1706924	4	95.122
Marker1667469	4	95.25
Marker1719451	4	95.549
Marker1678802	4	95.934
Marker1674355	4	95.934
Marker1693102	4	96.19
Marker1703503	4	96.66
Marker1707930	4	97.002
Marker1773107	4	97.259
Marker1664661	4	97.43
Marker1734641	4	97.43
Marker1729227	4	97.43
Marker1748758	4	97.686
Marker1709369	4	97.985
Marker1697715	4	97.985
Marker1721422	4	97.985
Marker1707702	4	98.156
Marker1711027	4	98.413
Marker1666713	4	98.755
Marker1736251	4	99.139
Marker1752808	4	99.139
Marker1713422	4	99.267
Marker1684703	4	99.652
Marker1678885	4	100.037
Marker1696982	4	100.378
Marker1751253	4	100.635
Marker1698706	4	100.635
Marker1665791	4	101.109
Marker1769894	4	101.493
Marker1664574	4	102.006
Marker1690207	4	102.605
Marker1711399	4	102.775
Marker1709588	4	102.775
Marker1721448	4	102.775
Marker1684017	4	102.775
Marker1737345	4	102.775
Marker1712696	4	103.246
Marker1752264	4	103.716
Marker1747227	4	104.186
Marker1693839	4	104.528
Marker1676670	4	104.741
Marker1735353	4	105.083
Marker1694835	4	105.211
Marker1705865	4	105.34
Marker1748017	4	105.468
Marker1670534	4	105.468
Marker1727391	4	105.639
Marker1706555	4	106.023
Marker1748843	4	106.194
Marker1740467	4	106.194
Marker1751480	4	106.194
Marker1720003	4	106.579
Marker1755584	4	106.835
Marker1765247	4	106.835
Marker1699957	4	106.835
Marker1724166	4	106.835
Marker1670843	4	106.835
Marker1776532	4	106.835
Marker1768377	4	106.835
Marker1754292	4	107.006
Marker1687317	4	107.006
Marker1723844	4	107.177
Marker1773640	4	107.434
Marker1756643	4	107.605
Marker1688626	4	107.605
Marker1725322	4	107.605
Marker1730720	4	107.776
Marker1716133	4	107.904
Marker1772734	4	108.032
Marker1729957	4	108.16
Marker1756475	4	108.331
Marker1726608	4	108.331
Marker1769490	4	108.331
Marker1764133	4	108.331
Marker1681738	4	108.331
Marker1748118	4	108.331
Marker1747584	4	108.331
Marker1719963	4	108.331
Marker1745480	4	108.331
Marker1701530	4	108.331
Marker1714251	4	108.331
Marker1743263	4	108.331
Marker1668026	4	108.502
Marker1666707	4	108.758
Marker1671172	4	109.229
Marker1697278	4	109.485
Marker1750522	4	109.485
Marker1720065	4	109.827
Marker1714322	4	110.169
Marker1688525	4	110.511
Marker1715391	4	110.895
Marker1777924	4	110.895
Marker1673728	4	110.895
Marker1681513	4	110.895
Marker1688256	4	110.895
Marker1709370	4	110.895
Marker1677250	4	110.895
Marker1688397	4	110.895
Marker1752865	4	110.895
Marker1757964	4	110.895
Marker1759659	4	110.895
Marker1760130	4	110.895
Marker1772199	4	110.895
Marker1679912	4	110.895
Marker1690325	4	110.895
Marker1771010	4	110.895
Marker1740153	4	110.895
Marker1736878	4	110.895
Marker1739610	4	110.895
Marker1700457	4	110.895
Marker1705231	4	111.237
Marker1724891	4	111.579
Marker1672388	4	111.835
Marker1725687	4	112.22
Marker1760828	4	112.348
Marker1697336	4	112.348
Marker1722632	4	112.348
Marker1687421	4	112.348
Marker1769530	4	112.606
Marker1727530	4	112.606
Marker1721841	4	112.863
Marker1689811	4	113.119
Marker1709222	4	113.119
Marker1729272	4	113.119
Marker1750016	4	113.119
Marker1701121	4	113.119
Marker1751101	4	113.119
Marker1666833	4	113.119
Marker1667037	4	113.119
Marker1715259	4	113.248
Marker1753901	4	113.248
Marker1769483	4	113.248
Marker1714936	4	113.248
Marker1735446	4	113.418
Marker1756080	4	113.675
Marker1776558	4	113.931
Marker1737165	4	114.059
Marker1758116	4	114.059
Marker1743086	4	114.059
Marker1668689	4	114.188
Marker1740054	4	114.658
Marker1751543	4	115.042
Marker1674594	4	115.299
Marker1771964	4	115.47
Marker1681134	4	115.47
Marker1753958	4	115.47
Marker1714275	4	115.47
Marker1695513	4	115.47
Marker1684640	4	115.47
Marker1731707	4	115.47
Marker1729127	4	115.641
Marker1720649	4	115.946
Marker1756270	4	116.117
Marker1719904	4	116.117
Marker1670428	4	116.117
Marker1701214	4	116.117
Marker1688491	4	116.374
Marker1669026	4	116.502
Marker1750918	4	116.758
Marker1761827	4	116.758
Marker1696191	4	116.758
Marker1671288	4	117.229
Marker1699954	4	117.357
Marker1749779	4	117.613
Marker1764501	4	118.47
Marker1729525	4	118.986
Marker1709684	4	118.986
Marker1721058	4	118.986
Marker1680117	4	119.115
Marker1684351	4	119.334
Marker1664863	4	119.334
Marker1685445	4	119.554
Marker1734728	4	119.554
Marker1670101	4	119.771
Marker1672203	4	119.942
Marker1722576	4	120.203
Marker1775640	4	120.426
Marker1666474	4	120.426
Marker1754335	4	120.426
Marker1757162	4	120.426
Marker1719464	4	120.426
Marker1723818	4	120.664
Marker1754782	4	120.902
Marker1687881	4	121.135
Marker1698965	4	121.135
Marker1732235	4	121.135
Marker1775965	4	121.135
Marker1762009	4	121.367
Marker1771258	4	121.367
Marker1766333	4	121.367
Marker1735611	4	121.581
Marker1709981	4	121.581
Marker1757662	4	121.817
Marker1735589	4	121.817
Marker1731877	4	122.293
Marker1744144	4	124.862
Marker1761644	4	125.033
Marker1695106	4	125.033
Marker1695218	4	125.033
Marker1731763	4	125.254
Marker1716755	4	125.254
Marker1745089	4	125.526
Marker1668039	4	125.825
Marker1771202	4	126.252
Marker1697537	4	126.252
Marker1755235	4	126.252
Marker1766473	4	126.252
Marker1698106	4	126.508
Marker1706025	4	126.765
Marker1678469	4	127.021
Marker1763580	4	127.192
Marker1771974	4	127.192
Marker1678263	4	127.192
Marker1672553	4	127.406
Marker1736062	4	127.406
Marker1689447	4	127.406
Marker1682211	4	127.901
Marker1728353	4	129.62
Marker1675540	4	130.145
Marker1738185	4	130.539
Marker1762722	4	130.539
Marker1694238	4	131.206
Marker1771913	4	132.163
Marker1707574	4	133.483
Marker1776178	4	134.734
Marker1724958	4	135.886
Marker1778273	4	136.687
Marker1703376	4	136.687
[truncated: 6,078 more rows]

## Sheet: Genotype
Marker376272	B	B	B	B	A	B	B	B	A	B	A	A	B	B	A	B	B	B	B	B	B	A	A	A	X	A	B	B	B	A	B	A	A	A	A	B	A	B	B	A	B	A	B	A	A	A	A	B	A
Marker490516	B	B	B	B	A	B	B	B	A	B	A	A	B	B	A	B	B	B	B	B	B	A	X	A	B	A	B	B	B	A	B	A	A	A	A	B	A	B	B	A	B	A	B	A	A	A	A	B	A
Marker362998	B	B	B	B	A	B	B	B	A	B	A	A	B	B	A	B	B	B	B	B	X	A	X	A	B	A	B	B	X	A	B	A	A	A	A	B	A	B	B	A	B	A	B	A	A	A	A	B	A
Marker399295	B	B	B	B	A	B	B	B	A	B	A	A	B	B	A	B	B	B	B	B	B	A	A	A	X	A	B	B	B	A	B	A	A	A	A	B	A	B	B	A	B	A	B	A	A	A	A	B	A
Marker376129	B	B	B	B	A	B	B	B	A	B	A	A	B	B	A	B	B	B	B	B	B	A	A	A	X	A	B	B	X	A	B	A	A	A	A	B	A	B	B	A	B	A	B	A	A	A	A	B	A
Marker461181	B	B	B	B	A	B	B	B	A	B	A	A	B	B	A	B	B	B	B	B	B	A	A	A	B	A	B	B	B	A	B	A	A	A	A	B	A	B	B	A	B	A	B	A	A	A	A	B	A
Marker395506	B	B	A	B	A	B	B	B	A	B	A	A	B	B	A	B	B	B	B	B	A	A	A	A	B	A	B	B	B	A	B	A	A	A	A	B	A	B	B	A	B	A	B	A	A	A	A	B	A
Marker370776	B	B	A	B	A	B	B	B	A	B	A	A	B	B	A	B	B	B	B	B	A	A	A	A	B	A	B	B	A	A	B	A	A	A	A	B	A	B	B	A	B	A	B	A	A	A	A	B	A
Marker484841	B	B	A	B	A	B	B	B	A	B	A	A	B	B	A	B	B	B	B	B	A	A	X	A	X	A	B	B	A	A	B	A	A	A	A	B	A	B	B	A	B	A	B	A	A	A	A	B	A
Marker380511	B	B	A	B	A	B	B	B	A	B	A	A	B	B	A	B	B	B	B	B	A	A	A	A	X	A	B	B	A	A	B	A	A	A	A	B	A	B	B	A	B	A	B	A	A	A	A	B	A
Marker479028	B	B	A	B	A	B	B	B	A	B	A	A	B	B	A	B	B	B	B	B	A	A	X	X	X	A	B	B	X	A	B	A	A	A	A	B	A	B	B	A	B	A	B	A	A	A	A	B	A
Marker457401	B	B	A	B	A	B	B	B	A	B	A	A	B	B	A	B	B	B	B	B	A	A	A	A	X	A	B	B	A	A	B	A	A	A	A	B	A	B	B	A	B	A	B	A	A	A	A	B	A
Marker372941	B	B	A	B	A	B	B	B	A	B	A	A	B	B	A	B	B	B	B	B	A	A	A	A	B	A	B	B	A	A	B	A	A	A	A	B	A	B	B	A	B	A	B	A	A	A	A	B	A
Marker473249	B	B	A	B	A	B	B	B	A	B	A	A	B	B	A	B	B	B	B	B	A	A	A	X	B	A	B	B	A	A	B	A	A	A	A	B	A	B	B	A	B	A	B	A	A	A	A	B	A
Marker404224	B	B	A	B	A	B	B	B	A	B	A	X	B	B	A	B	B	B	B	B	A	A	X	A	B	A	B	B	A	A	B	A	A	A	A	B	A	B	B	A	B	A	B	A	A	A	A	B	A
Marker444603	B	B	A	B	A	B	B	B	A	B	A	A	B	B	A	B	B	B	B	B	A	A	A	A	B	A	B	B	A	A	B	A	A	A	A	B	A	B	B	A	B	A	B	A	A	A	A	B	A
Marker378961	A	A	A	B	A	B	B	B	A	B	A	B	B	B	A	B	B	B	B	B	A	B	B	B	B	B	X	A	A	A	B	A	A	A	A	B	A	B	B	B	B	A	B	A	A	A	A	B	A
Marker361917	A	A	A	B	A	B	B	B	A	B	A	B	B	B	A	B	B	B	B	B	A	B	B	B	X	B	A	A	A	A	B	A	A	A	A	B	A	B	B	B	B	A	B	A	A	A	A	B	A
Marker409709	A	A	A	B	A	B	B	B	A	B	A	B	B	B	A	B	B	B	B	B	A	B	B	B	B	B	A	A	A	A	B	A	A	A	A	B	A	B	B	B	B	A	B	A	A	A	A	B	A
Marker430912	A	A	A	B	A	B	B	B	A	B	A	B	B	B	A	B	B	B	B	B	A	B	B	B	B	B	A	A	A	A	B	A	A	A	A	B	A	B	B	B	B	A	B	A	A	A	A	B	A
Marker420917	A	A	A	B	A	B	B	B	A	B	A	B	B	B	A	B	B	B	B	B	A	B	B	B	B	B	A	A	A	A	B	A	A	A	A	B	A	B	B	B	B	A	B	A	A	A	A	A	A
Marker456370	A	X	A	B	A	B	B	B	A	B	A	B	B	B	X	X	B	B	B	B	A	B	B	B	B	B	A	A	A	A	B	A	A	A	A	B	A	B	B	B	B	A	B	A	A	B	A	A	A
Marker425856	X	A	A	B	A	B	B	B	A	B	A	B	B	B	A	B	B	B	B	X	A	B	B	B	B	B	A	A	A	A	B	A	A	A	A	B	A	B	B	B	B	A	B	A	A	B	A	A	A
Marker417977	A	A	A	B	A	A	B	B	A	B	A	X	B	B	X	A	B	A	B	X	X	A	B	B	X	B	A	A	A	A	B	A	A	A	X	B	A	B	A	B	B	A	X	A	A	B	A	A	A
Marker373133	A	A	A	B	A	A	B	B	A	B	A	A	B	B	B	A	B	A	B	A	B	A	B	B	A	B	A	A	A	A	B	A	A	A	A	B	A	B	A	B	B	A	A	A	A	B	A	A	A
Marker382132	A	A	A	B	A	A	B	B	A	B	A	A	B	B	B	A	B	A	B	A	B	A	B	B	A	B	A	A	A	A	B	A	A	A	A	B	A	B	A	B	B	A	A	A	A	B	A	A	A
Marker481163	X	B	A	B	A	A	B	B	A	B	A	A	B	B	B	A	B	A	B	A	B	A	B	B	X	B	A	A	A	A	B	A	A	A	X	B	A	B	A	B	B	A	A	A	A	B	A	A	A
Marker369696	B	B	A	B	A	A	B	B	A	B	A	A	B	B	B	A	B	X	B	A	B	X	B	B	X	B	A	A	A	A	B	A	A	A	A	B	A	B	A	B	B	A	A	A	A	B	A	A	A
Marker391190	B	B	A	B	A	A	B	B	A	B	A	A	B	B	B	A	B	X	B	A	X	A	B	B	X	B	A	A	A	A	B	A	A	A	A	B	A	B	A	B	B	A	A	A	A	B	A	A	A
Marker426203	B	B	A	B	A	A	B	B	A	B	A	A	B	B	B	A	B	A	B	A	B	A	B	B	X	B	A	A	A	A	B	A	A	A	B	B	A	B	A	B	B	A	A	A	A	B	A	A	A
Marker403422	B	B	B	B	A	A	B	B	A	B	A	A	B	B	B	A	B	A	B	A	B	A	B	B	X	B	A	A	A	A	B	A	A	A	B	B	A	B	A	B	B	A	A	A	A	B	A	A	A
Marker443363	B	B	X	B	A	A	B	B	A	B	A	A	B	B	B	A	B	A	B	A	B	A	B	B	X	B	A	A	A	A	B	A	A	A	B	B	A	B	A	B	B	A	A	A	A	B	A	A	A
Marker486569	B	B	B	B	A	A	B	B	A	B	A	A	B	B	B	A	B	A	B	A	B	X	B	B	X	B	A	A	A	A	B	A	A	A	B	B	A	B	X	B	B	A	A	A	A	B	A	A	A
Marker471859	B	B	B	B	A	A	B	B	A	B	A	A	B	B	B	A	B	A	B	A	B	A	B	B	A	B	A	A	A	A	B	A	A	A	B	B	A	B	B	B	B	A	A	B	A	B	A	A	A
Marker417558	B	B	B	B	A	A	B	B	A	B	A	A	B	B	B	A	B	A	B	A	B	A	B	B	A	B	A	A	A	A	B	A	A	A	B	B	A	B	B	B	B	A	A	B	A	B	A	A	A
Marker464155	B	B	B	B	A	A	B	B	A	B	A	A	B	B	B	A	B	A	B	A	B	A	B	B	A	B	A	A	A	A	B	A	A	A	B	B	A	B	B	B	B	A	A	B	A	B	A	A	A
Marker440296	B	B	B	B	A	A	B	B	A	B	B	A	B	B	B	A	B	A	B	A	B	B	B	B	X	B	A	A	A	X	B	A	A	A	B	B	A	B	B	B	B	A	A	B	A	B	A	A	A
Marker402097	B	B	B	B	A	B	B	B	A	B	B	A	B	B	B	B	B	A	B	X	B	B	B	B	X	B	A	A	A	B	B	A	X	A	B	B	A	B	B	B	B	A	A	B	A	B	A	A	A
Marker472424	B	B	B	B	A	B	B	B	A	B	B	A	B	B	B	B	B	A	B	A	B	B	B	B	A	B	A	A	X	B	B	A	X	A	B	B	A	B	B	B	B	A	A	B	A	B	A	A	A
Marker394853	B	B	B	B	A	B	B	B	A	B	B	A	B	B	B	X	B	A	B	A	B	B	B	B	X	B	A	A	A	B	B	A	X	A	B	B	A	B	B	B	B	A	A	B	B	B	A	A	A
Marker389332	B	B	B	B	A	B	B	B	A	B	B	A	B	B	B	B	B	A	B	A	B	B	B	B	A	B	A	A	A	B	B	A	A	A	B	B	A	B	B	B	B	A	A	B	B	B	A	A	A
Marker399061	B	B	B	B	A	B	B	B	A	B	B	A	B	B	B	B	B	A	B	A	B	B	B	B	X	B	A	A	A	B	B	A	A	A	B	B	A	B	B	B	B	A	A	B	B	B	A	A	A
Marker419330	B	B	B	B	A	B	B	B	A	B	B	A	B	B	B	B	B	A	B	A	B	B	B	B	A	B	A	A	X	B	B	A	X	A	B	B	A	B	B	B	B	A	A	B	X	B	A	A	A
Marker411413	B	B	B	B	A	B	B	B	A	B	B	A	B	B	B	B	B	A	B	A	B	B	B	B	A	B	A	A	X	B	B	A	A	A	B	B	A	B	B	B	B	A	A	B	B	B	A	A	A
Marker453311	B	B	B	B	A	B	B	B	A	B	B	A	B	B	B	B	B	A	B	A	B	B	B	B	A	B	A	A	X	B	B	A	A	A	B	B	A	B	B	B	B	A	A	B	B	B	A	A	A
Marker473916	B	B	B	B	A	B	B	B	A	B	B	A	B	B	B	B	B	A	B	A	B	B	B	B	A	B	A	A	A	B	B	A	A	A	B	B	A	B	B	B	B	A	A	B	B	B	A	A	A
Marker412454	B	B	B	B	A	B	B	B	A	B	B	A	B	B	B	B	B	A	B	A	B	B	B	B	A	B	A	A	X	B	B	A	A	A	B	B	A	B	B	B	B	A	A	B	B	B	A	A	A
Marker378656	B	B	B	B	A	B	B	B	A	B	B	A	B	B	B	B	B	A	B	A	B	B	B	B	A	B	A	A	A	B	B	A	X	A	B	B	A	B	B	B	B	A	A	B	B	B	A	A	A
Marker357166	B	B	B	B	X	B	B	B	A	B	B	A	B	B	B	B	B	A	B	X	B	B	B	B	A	B	A	A	A	B	B	A	X	A	B	B	A	B	B	B	B	A	B	B	B	B	A	A	A
Marker461001	B	B	B	B	A	B	B	B	A	B	B	A	B	B	B	B	B	A	B	A	B	B	B	B	A	B	A	A	A	B	B	A	A	A	B	B	A	B	B	B	B	A	B	B	B	B	A	A	A
Marker365387	B	B	B	B	X	B	B	B	A	A	B	B	B	B	B	B	B	A	B	B	B	B	B	A	A	X	B	A	A	B	B	A	A	A	B	B	A	B	B	B	B	B	X	B	A	B	A	A	A
Marker435978	B	B	B	B	H	B	B	B	A	A	B	B	B	B	B	B	B	A	B	B	B	B	B	A	A	A	B	A	A	B	B	A	B	A	B	B	A	B	B	B	B	B	B	B	A	B	A	A	A
Marker457066	B	B	B	B	H	B	B	B	A	A	B	B	B	B	B	B	B	A	B	B	B	B	B	A	A	A	B	A	A	B	B	A	B	A	B	B	A	B	B	B	B	B	B	B	A	B	A	A	A
Marker489484	B	B	B	B	A	B	B	B	A	A	B	B	B	B	B	B	B	A	B	B	B	B	B	X	A	A	B	A	A	B	B	A	B	A	B	B	A	B	B	B	B	B	B	B	A	B	A	A	A
Marker464207	B	B	B	B	H	B	B	B	A	A	B	B	B	B	B	B	B	A	B	B	B	B	B	A	A	A	B	A	A	B	B	A	X	A	B	B	A	B	B	B	B	B	B	B	A	B	A	A	A
Marker358819	B	B	B	B	A	B	B	B	A	A	B	B	B	X	B	B	B	A	B	B	B	B	B	A	A	A	B	A	A	B	B	A	B	A	B	B	A	B	B	B	B	B	B	B	A	B	A	A	A
Marker395025	B	B	B	B	A	B	B	B	A	A	B	B	B	A	B	B	B	A	B	B	B	B	B	B	A	A	B	A	A	B	B	A	B	A	B	B	A	B	B	B	B	B	B	B	A	B	A	A	A
Marker410230	B	B	B	B	H	B	B	B	A	A	B	B	B	A	B	B	B	A	B	B	B	B	B	B	A	A	B	A	A	B	B	A	B	A	B	B	A	B	B	B	B	B	B	B	A	B	A	A	A
Marker404360	B	B	B	B	H	B	B	B	A	A	B	B	B	A	B	B	B	A	B	B	B	B	B	B	A	A	B	A	A	B	B	A	B	A	B	B	A	B	B	B	B	B	B	B	A	B	A	A	A
Marker464330	B	B	B	B	X	B	B	B	A	A	B	B	B	A	B	B	B	A	B	B	B	B	B	B	X	A	B	A	A	B	B	A	X	A	B	B	A	B	B	B	B	B	B	X	B	B	A	A	A
Marker435265	B	B	B	B	H	B	B	B	A	A	B	B	B	A	B	B	B	A	B	B	B	B	B	B	X	A	B	A	A	B	B	A	X	A	B	B	A	B	B	B	B	B	B	X	B	B	A	A	A
Marker435814	B	B	B	B	H	B	B	B	A	A	B	B	B	A	B	B	B	A	B	B	B	B	B	B	X	A	B	A	A	B	B	A	B	A	B	B	A	B	B	B	B	B	B	X	B	B	A	A	A
Marker435178	B	B	B	B	H	B	B	B	A	A	B	B	B	A	B	B	B	A	B	B	B	B	B	B	A	A	B	A	A	B	B	A	X	A	B	B	A	B	B	B	B	B	B	B	B	B	A	A	A
Marker422845	B	B	B	B	X	B	B	B	A	A	B	B	B	A	B	B	B	A	B	B	B	B	B	B	X	A	B	A	A	B	B	A	X	A	B	B	A	B	B	B	B	B	B	X	A	B	A	A	A
Marker444874	B	B	B	B	H	B	B	B	A	A	B	B	B	A	B	B	B	A	B	B	B	B	B	B	A	A	B	A	A	B	B	A	B	A	B	B	A	B	B	B	B	B	B	B	A	B	A	A	A
Marker477934	B	B	B	B	X	B	B	B	A	A	B	B	B	A	B	B	B	A	B	B	B	B	B	B	X	A	B	A	A	B	B	A	B	A	B	B	A	B	B	B	B	B	B	B	A	B	A	A	A
Marker458297	B	B	B	B	A	B	B	B	A	A	B	B	B	A	B	B	B	A	B	B	B	B	B	B	A	A	B	A	A	B	B	A	X	A	B	B	A	B	B	B	B	B	B	X	X	B	A	A	A
Marker411416	B	B	B	B	A	B	B	B	A	A	B	B	B	A	B	B	B	A	B	B	B	B	B	B	A	A	B	A	A	B	B	A	B	A	B	B	A	B	B	B	B	B	B	A	A	B	A	A	A
Marker474883	B	B	B	B	A	B	B	B	A	A	B	B	B	A	B	B	B	A	B	B	B	B	B	B	X	A	B	A	A	B	B	A	B	A	B	B	A	B	B	B	B	B	B	X	A	B	A	A	A
Marker405419	B	B	B	B	A	B	B	B	A	A	B	B	B	A	B	B	B	A	B	B	B	B	B	B	X	A	B	A	A	B	B	A	B	A	B	B	A	B	B	B	B	B	B	A	A	B	A	A	A
Marker429045	B	B	B	B	A	B	B	B	A	A	B	B	B	A	B	B	B	A	B	B	B	B	B	B	X	A	B	A	A	B	B	A	B	A	B	B	A	B	B	B	B	B	B	X	A	B	A	A	A
Marker359770	B	B	B	B	H	B	B	B	A	A	B	B	B	A	B	B	B	A	B	B	B	B	B	B	A	A	B	A	A	B	B	A	X	A	B	B	A	B	B	B	B	B	B	A	A	B	A	A	A
Marker440589	B	B	B	B	H	B	B	B	A	A	B	B	B	A	B	B	B	A	B	B	B	B	B	B	A	A	B	A	A	B	B	A	B	A	B	B	A	B	B	B	B	B	B	A	A	B	A	A	A
Marker457281	B	B	B	B	A	B	B	B	A	A	B	B	B	A	B	B	B	A	B	B	B	B	B	B	X	A	B	A	A	B	B	A	B	A	B	B	A	B	B	B	B	B	B	A	A	B	A	A	A
Marker459936	B	B	B	B	A	B	B	B	A	A	B	B	B	A	B	B	B	A	B	B	B	B	B	B	X	A	B	A	X	B	B	A	X	A	A	B	A	B	B	H	B	B	B	A	A	B	A	A	A
Marker470473	B	B	B	B	A	B	B	B	A	A	B	B	B	A	B	B	B	A	B	B	B	B	B	B	X	A	B	A	A	B	B	A	B	A	A	B	A	B	B	H	B	B	B	A	A	B	A	A	A
Marker410193	B	B	B	B	A	B	B	B	A	A	B	B	B	A	B	B	B	A	B	B	B	B	B	B	B	A	B	A	X	B	B	A	B	A	A	B	A	B	B	B	B	B	B	A	A	B	A	A	A
Marker419305	B	B	B	B	A	B	B	B	A	A	B	B	B	A	B	B	B	A	B	B	B	B	B	B	B	A	B	A	X	B	B	A	X	A	A	B	A	B	B	H	B	B	B	A	H	B	A	A	A
Marker446566	B	B	B	B	A	B	B	B	A	A	B	B	B	A	B	B	B	A	B	B	B	B	B	B	X	A	B	A	X	B	B	A	X	A	A	B	A	B	B	H	B	B	B	A	H	B	A	A	A
Marker428360	B	B	B	B	A	B	B	B	A	A	B	B	B	A	B	B	B	A	B	B	B	B	B	B	X	A	B	A	B	B	B	A	X	A	A	B	A	B	B	B	B	B	B	A	A	B	A	A	A
Marker432372	B	B	B	B	A	B	B	B	A	A	B	B	B	A	B	B	B	A	B	B	B	B	B	B	B	A	B	A	B	X	B	A	X	A	A	B	A	B	B	H	B	B	B	A	A	B	A	A	A
Marker456617	B	B	B	B	A	B	B	B	A	A	B	B	B	A	B	B	B	A	B	B	B	B	B	B	X	A	B	A	X	A	B	A	B	A	A	B	A	B	B	H	B	B	B	A	A	B	A	A	A
Marker385333	B	B	B	B	A	B	B	B	A	A	B	B	B	A	B	B	B	A	B	B	B	B	B	B	B	A	B	A	B	A	B	A	B	A	A	B	A	B	B	H	B	B	B	A	H	B	A	A	A
Marker393969	B	B	B	B	A	B	B	B	A	A	B	B	B	A	B	B	B	A	B	B	B	B	B	B	B	A	B	A	B	A	B	A	B	A	A	B	A	B	B	H	B	B	B	A	H	B	A	A	A
Marker440245	B	B	B	B	A	B	B	B	A	A	B	B	B	A	B	B	B	A	B	B	B	B	B	B	B	A	B	A	B	A	B	A	B	A	A	B	A	B	B	H	B	B	B	A	A	B	A	A	A
Marker432243	B	B	B	B	A	B	B	B	A	A	B	B	B	A	B	B	B	A	B	B	B	B	B	B	B	A	B	A	B	A	B	A	B	A	A	B	A	B	B	H	B	B	B	A	A	B	A	A	A
Marker393383	B	B	B	B	A	B	B	B	A	A	B	B	B	A	B	B	B	A	B	B	B	B	B	B	B	A	B	A	B	A	B	A	X	A	A	B	A	B	B	B	B	B	B	A	H	B	A	A	A
Marker478552	B	B	B	B	A	B	B	B	A	A	B	B	B	A	B	B	B	A	B	B	B	B	B	B	B	A	B	A	B	A	B	A	B	A	A	B	A	B	B	B	B	B	B	A	H	B	A	A	A
Marker430791	B	B	B	B	A	B	B	B	A	A	B	B	B	A	B	B	B	A	B	B	B	B	B	B	B	A	B	A	X	A	B	A	B	A	A	B	A	B	B	H	B	B	B	A	H	B	A	A	A
Marker483623	B	B	B	B	A	B	B	B	A	A	B	B	B	A	B	B	B	A	B	B	B	B	B	B	B	A	B	A	X	A	B	A	B	A	A	B	A	B	B	H	B	B	B	A	A	B	A	A	A
Marker474689	B	B	B	B	A	B	B	B	A	A	B	B	B	A	B	B	B	A	B	B	B	B	B	B	B	A	B	A	B	A	B	A	B	A	A	B	A	B	B	B	B	B	B	A	A	B	A	A	A
Marker408214	B	B	B	B	A	B	B	B	A	A	B	B	B	A	B	B	B	A	B	B	B	B	B	B	B	A	B	A	B	A	B	A	B	A	A	B	A	B	B	B	B	B	B	A	A	B	A	A	A
Marker420396	B	B	B	B	A	B	B	B	A	A	B	B	B	A	B	B	B	A	B	B	B	B	B	B	B	A	B	A	B	A	B	A	X	A	A	B	A	B	B	H	B	B	B	A	A	B	A	A	A
Marker376793	B	B	B	B	A	B	B	B	A	A	B	B	B	A	B	B	B	A	B	B	B	B	B	B	B	A	B	A	B	A	B	A	X	A	A	B	A	B	B	H	B	B	B	A	A	B	A	A	A
Marker443616	B	B	B	B	A	B	B	B	A	A	B	B	B	A	B	B	B	A	B	B	B	B	B	B	B	A	B	A	X	A	B	A	X	A	A	B	A	B	B	H	B	B	B	A	A	B	A	A	A
Marker358088	B	B	B	B	A	B	B	B	A	A	B	B	B	A	B	B	B	A	B	B	B	B	B	B	B	A	B	A	B	A	B	A	B	A	A	B	A	B	B	B	B	B	B	A	A	B	A	A	A
Marker432462	B	B	B	B	A	X	B	B	A	A	B	B	B	A	B	B	B	A	B	B	B	B	B	B	B	A	B	A	X	A	B	A	X	A	A	B	A	B	B	X	B	B	B	A	A	B	A	A	A
Marker471591	B	B	B	B	A	A	B	B	A	A	B	B	B	A	B	B	B	A	B	B	B	B	B	B	B	A	B	A	X	A	B	A	B	A	A	B	A	B	B	B	B	B	B	A	A	B	A	A	A
Marker487979	B	B	B	B	A	A	B	B	A	A	B	B	B	A	B	B	B	A	B	B	B	B	B	B	B	A	B	A	B	A	B	A	B	A	A	B	A	B	B	B	B	B	B	A	A	B	A	A	A
Marker490890	B	B	B	B	A	A	B	B	A	A	B	B	B	A	B	B	B	A	B	B	B	B	B	B	B	A	B	A	B	A	B	A	X	A	A	B	A	B	B	H	B	B	B	A	A	B	A	A	A
Marker477068	B	B	B	B	A	A	B	B	A	A	B	B	B	A	B	B	B	A	B	B	B	B	B	B	B	A	B	A	B	A	B	A	B	A	A	B	A	B	B	H	B	B	B	A	A	B	A	A	A
Marker357735	B	B	B	B	A	A	B	B	A	A	B	B	B	A	B	B	B	A	B	B	B	B	B	B	B	A	B	A	B	A	B	A	B	A	A	B	A	B	B	H	B	B	B	A	A	B	A	A	A
Marker362917	B	B	B	B	A	A	B	B	A	A	B	B	B	A	B	B	B	A	B	B	B	B	B	B	B	A	B	A	B	A	B	A	B	A	A	B	A	B	B	H	B	B	B	A	A	B	A	A	A
Marker484070	B	B	B	B	A	A	B	B	A	A	B	B	B	A	B	B	B	A	B	B	B	B	B	B	B	A	B	A	B	A	B	A	B	A	A	B	A	B	B	H	B	B	B	A	A	B	A	A	A
Marker437969	B	B	B	B	A	A	B	B	A	A	B	B	B	A	B	B	B	A	B	B	B	B	B	B	B	A	B	A	B	A	B	A	B	A	A	B	A	B	B	H	B	B	B	A	A	B	A	A	A
Marker465793	B	B	B	B	A	A	B	B	A	A	B	B	B	A	B	B	B	A	B	B	B	B	B	B	B	A	B	A	X	A	B	A	B	A	A	B	A	B	B	X	B	B	B	A	A	B	A	A	A
Marker462050	B	B	B	B	A	A	B	B	A	A	B	B	B	A	B	B	B	A	B	B	B	B	B	B	B	A	B	A	X	A	B	A	X	A	A	B	A	B	B	H	B	B	B	A	A	B	A	A	A
Marker367799	B	B	B	B	A	A	B	B	A	A	B	B	B	A	B	B	B	A	B	B	B	B	B	B	B	A	B	A	X	A	B	A	X	A	A	B	A	B	B	X	B	B	B	A	A	B	A	A	A
Marker455432	B	B	B	B	A	A	B	B	A	A	B	B	B	A	B	B	B	A	B	B	B	B	B	B	B	A	B	A	B	A	B	A	X	A	A	B	A	B	B	H	B	B	B	A	A	B	A	A	A
Marker423076	B	B	B	B	A	A	B	B	A	A	B	B	B	A	B	B	B	A	B	B	B	B	B	B	B	A	B	A	X	A	B	A	B	A	A	B	A	B	B	B	B	B	B	A	A	B	A	A	A
Marker421925	B	B	B	B	A	A	B	B	A	A	B	B	B	A	B	B	B	A	B	B	B	B	B	B	B	A	B	A	B	A	B	A	X	A	A	B	A	B	B	B	B	B	B	A	A	B	A	A	A
Marker483723	B	B	B	B	A	A	B	B	A	A	B	B	B	A	B	B	B	A	B	B	B	B	B	B	B	A	B	A	B	A	B	A	B	A	A	B	A	B	B	B	B	B	B	A	A	B	A	A	A
Marker398995	B	B	B	B	A	A	B	B	A	A	B	B	B	A	B	B	B	A	B	B	B	B	B	B	B	A	B	A	B	A	B	A	B	A	A	B	A	B	B	B	B	B	B	A	A	B	A	A	A
Marker486645	B	B	B	B	A	A	B	B	A	A	B	B	B	A	B	B	B	A	B	B	B	B	B	B	B	A	B	A	X	A	B	A	B	A	A	B	A	B	B	B	B	B	B	A	A	B	A	A	A
Marker436872	B	B	B	B	A	A	B	B	A	A	B	B	B	A	B	B	B	A	B	B	B	B	B	B	B	A	B	A	B	A	B	A	B	A	A	B	A	B	B	B	B	B	B	A	A	B	A	A	A
Marker367722	B	B	B	B	A	A	B	B	A	A	B	B	B	A	B	B	B	A	B	B	B	B	B	B	B	A	B	A	B	A	B	A	B	A	A	B	A	B	B	B	B	B	B	A	A	B	A	A	A
Marker428396	B	B	B	B	A	A	B	B	A	A	B	B	B	A	B	B	B	A	B	B	B	B	B	B	B	A	B	A	X	A	B	A	B	A	A	B	A	B	B	B	B	B	B	A	A	B	A	A	A
Marker372137	B	B	B	B	A	A	B	B	A	A	B	B	B	A	B	B	B	A	B	B	B	B	B	B	B	A	B	A	B	A	B	A	B	A	A	B	A	B	B	B	B	B	B	A	A	B	A	A	A
Marker410523	B	B	B	B	A	A	B	B	A	A	B	B	B	A	B	B	B	A	B	B	B	B	B	B	B	A	B	A	B	A	B	A	B	A	A	B	A	B	B	B	B	B	B	A	A	B	A	A	A
Marker384412	B	B	B	B	A	A	B	B	A	A	B	B	B	A	B	B	B	A	B	B	B	B	B	B	B	A	B	A	X	A	B	A	B	A	A	B	A	B	B	B	B	B	B	A	A	B	A	A	A
Marker444556	B	B	B	B	A	A	B	B	A	A	B	B	B	A	B	B	B	A	B	B	B	B	B	B	B	A	B	A	X	A	B	A	B	A	A	B	A	B	B	B	B	B	B	A	A	B	A	A	A
Marker437656	B	B	B	B	A	A	B	B	A	A	B	B	B	A	B	B	B	A	B	B	B	B	B	B	B	A	B	A	X	A	B	A	B	A	A	B	A	B	B	B	B	B	B	A	A	B	A	A	A
Marker456676	B	B	B	B	A	A	B	B	A	A	B	B	B	A	B	B	B	A	B	B	B	B	B	B	B	A	B	A	B	A	B	A	B	A	A	B	A	B	B	B	B	B	B	A	A	B	A	A	A
Marker453446	B	B	B	B	A	A	B	B	A	A	B	B	B	A	B	B	B	A	B	B	B	B	B	B	B	A	B	A	B	A	B	A	X	A	A	B	A	B	B	B	B	B	B	A	A	B	A	A	A
Marker359909	B	B	B	B	A	A	B	B	A	A	B	B	B	A	B	B	B	A	B	B	B	B	B	B	B	A	B	A	X	A	B	A	B	A	A	B	A	B	B	B	B	B	B	A	A	B	A	A	A
Marker376420	B	B	B	B	A	A	B	B	A	A	B	B	B	A	B	B	B	A	B	B	B	B	B	B	B	A	B	A	B	A	B	A	B	A	A	B	A	B	B	B	B	B	B	A	A	B	A	A	A
Marker365932	B	B	B	B	A	A	B	B	A	A	B	B	B	A	B	B	B	A	B	B	B	B	B	B	B	A	B	A	B	A	B	A	X	A	A	B	A	B	B	B	B	B	B	A	A	B	A	A	A
Marker363779	B	B	B	B	A	A	B	B	A	A	B	B	B	A	B	B	B	A	B	B	B	B	B	B	B	A	B	A	B	A	B	A	B	A	A	B	A	B	B	B	B	B	B	A	A	B	A	A	A
Marker360509	B	B	B	B	A	A	B	B	A	A	B	B	B	A	B	B	B	A	B	B	B	B	B	B	B	A	B	A	B	A	B	A	B	A	A	B	A	B	B	B	B	B	B	A	A	B	A	A	A
Marker443675	B	B	B	B	A	A	B	B	A	A	B	B	B	A	B	B	B	A	B	B	B	B	B	B	B	A	B	A	B	A	B	A	X	A	A	B	A	B	B	B	B	B	B	A	A	B	A	A	A
Marker392202	B	B	B	B	A	A	B	B	A	A	B	B	B	A	B	B	B	A	B	B	B	B	B	B	B	A	B	A	X	A	B	A	B	A	A	B	A	B	B	B	B	B	B	A	A	B	A	A	A
Marker410857	B	B	B	B	A	A	B	B	A	A	B	B	B	A	B	B	B	A	B	B	B	B	B	B	B	A	B	A	B	A	B	A	B	A	A	B	A	B	B	B	B	B	B	A	A	B	A	A	A
Marker372997	B	B	B	B	A	A	B	B	A	A	B	B	B	A	B	B	B	A	B	B	B	B	B	B	B	A	B	A	B	A	B	A	B	A	A	B	A	B	B	B	B	B	B	A	A	B	A	A	A
Marker381498	B	B	B	B	A	A	B	B	A	A	B	B	B	A	B	B	B	A	B	B	B	B	B	B	B	A	B	A	X	A	B	A	X	A	A	B	A	B	B	B	B	B	B	A	A	B	A	A	A
Marker362380	B	B	B	B	A	A	B	B	A	A	B	B	B	A	B	B	B	A	B	B	B	B	B	B	B	A	B	A	X	A	B	A	B	A	A	B	A	B	B	B	B	B	B	A	A	B	A	A	A
Marker390921	B	B	B	B	A	A	B	B	A	A	B	B	B	A	B	B	B	A	B	B	B	B	B	B	B	A	B	A	X	A	B	A	B	A	A	B	A	B	B	B	B	B	B	A	A	B	A	A	A
Marker453006	B	B	B	B	A	A	B	B	A	A	B	B	B	A	B	B	B	A	B	B	B	B	B	B	B	A	B	A	B	A	B	A	B	A	A	B	A	B	B	B	B	B	B	A	A	B	A	A	A
Marker451426	B	B	B	B	A	A	B	B	A	A	B	B	B	A	B	B	B	A	B	B	B	B	B	B	B	A	B	A	X	A	B	A	X	A	A	B	A	B	B	B	B	B	B	A	A	B	A	A	A
Marker418077	B	B	B	B	A	A	B	B	A	A	B	B	B	A	B	B	B	A	B	B	B	B	B	B	B	A	B	A	X	A	B	A	X	A	A	B	A	B	B	B	B	B	B	A	A	B	A	A	A
Marker426579	B	B	B	B	A	A	B	B	A	A	B	B	B	A	B	B	B	A	B	B	B	B	B	B	B	A	B	A	B	A	B	A	B	A	A	B	A	B	B	X	B	B	B	A	A	B	A	A	A
Marker460933	B	B	B	B	A	A	B	B	A	A	B	B	B	A	B	B	B	A	B	B	B	B	B	B	B	A	B	A	B	A	B	A	X	A	A	B	A	B	B	H	B	B	B	A	A	B	A	A	A
Marker419621	B	B	B	B	A	A	B	B	A	A	B	B	B	A	B	B	B	A	B	B	B	B	B	B	B	A	B	A	B	A	B	A	B	A	A	B	A	B	B	H	B	B	B	A	A	B	A	A	A
Marker485587	B	B	B	B	A	A	B	B	A	A	B	B	B	A	B	B	B	A	B	B	B	B	B	B	B	A	B	A	X	A	B	A	X	A	A	B	A	B	B	H	B	B	B	A	A	B	A	A	A
Marker469032	B	B	B	B	A	A	B	B	A	A	B	B	B	A	B	B	B	A	B	B	B	B	B	B	B	A	B	A	B	A	B	A	B	A	A	B	A	B	B	H	B	B	B	A	A	B	A	A	A
Marker425994	B	B	B	B	A	A	B	B	A	A	B	B	B	A	B	B	B	A	B	B	X	B	B	B	B	A	B	A	B	A	B	A	X	A	A	B	A	B	B	X	B	B	B	A	A	B	A	A	A
Marker369701	B	B	B	B	A	A	B	B	A	A	B	B	B	A	B	B	B	A	B	B	A	B	B	B	B	A	B	A	X	A	B	A	X	A	A	B	A	B	B	H	B	B	B	A	A	B	A	A	A
Marker451072	B	B	B	B	A	A	B	B	A	A	B	B	B	A	B	B	B	A	B	B	A	B	B	B	B	A	B	A	X	A	B	A	X	A	A	B	A	B	B	A	B	B	B	A	A	B	A	A	A
Marker369341	B	B	B	B	A	A	B	B	A	A	B	B	B	A	B	B	B	A	B	B	A	B	B	B	B	A	B	A	A	A	B	A	B	A	A	B	A	B	B	A	B	B	B	A	A	B	A	A	A
Marker421538	B	B	B	B	A	A	B	B	A	A	B	B	B	A	B	B	B	A	B	B	A	B	B	B	X	A	B	A	X	A	B	A	X	A	A	B	A	B	B	A	B	B	B	A	A	B	A	A	A
Marker416251	B	B	B	B	A	A	B	B	A	A	B	B	B	A	B	B	B	A	B	B	A	B	B	B	B	A	B	A	B	A	B	A	X	A	A	B	A	B	B	A	B	B	B	A	A	B	A	A	A
Marker474825	B	B	B	B	A	A	B	B	A	A	B	B	B	A	B	B	B	A	B	B	A	B	B	B	B	A	B	A	B	A	B	A	B	A	A	B	A	B	B	A	B	B	B	A	A	B	A	A	A
Marker467582	B	B	B	B	A	A	B	B	A	A	B	B	B	A	B	B	B	A	B	B	A	B	B	B	X	A	B	A	B	A	B	A	X	A	A	B	A	B	B	A	B	B	B	A	A	B	A	A	A
Marker406115	B	B	B	B	A	A	B	B	A	A	B	B	B	A	B	B	B	A	B	B	A	B	B	B	B	A	B	A	B	A	B	A	B	A	A	B	A	B	B	A	B	B	B	A	A	B	A	A	A
Marker477742	B	B	B	B	A	A	B	B	A	A	B	B	B	A	B	B	B	A	B	B	A	B	B	B	X	A	B	A	B	A	B	A	B	A	A	B	A	B	B	A	B	B	B	A	A	B	A	A	A
Marker394413	B	B	B	B	A	A	B	B	A	A	B	B	B	A	B	B	B	A	B	B	A	B	B	B	B	A	B	A	B	A	B	A	B	A	A	B	A	B	B	A	B	B	B	A	A	B	A	A	A
Marker451264	B	B	B	B	A	A	B	B	A	A	B	B	B	A	B	B	B	A	B	B	A	B	B	B	X	A	B	A	B	A	B	A	X	A	A	B	A	B	B	A	B	B	B	A	X	B	A	A	A
Marker365478	B	B	B	B	A	A	B	B	A	A	B	B	B	A	B	B	B	A	B	B	A	B	B	B	B	A	B	A	X	A	B	A	B	A	A	B	A	B	B	X	B	B	B	A	H	B	A	A	A
Marker424062	B	B	B	B	A	A	B	B	A	A	B	B	B	A	B	B	B	A	B	B	A	B	B	B	B	A	B	A	A	A	B	A	B	A	A	B	A	B	B	A	B	B	B	A	H	B	A	A	A
Marker420577	B	B	B	B	A	A	B	B	A	A	B	B	B	A	B	B	B	A	B	B	A	B	B	B	X	A	B	A	A	A	B	A	X	A	A	B	A	B	B	A	B	B	B	A	H	B	A	A	A
Marker473163	B	B	B	B	A	A	B	B	A	A	B	B	B	A	B	B	B	A	B	B	A	B	B	B	B	A	B	A	X	A	B	A	B	A	A	B	A	B	B	A	B	B	B	A	H	B	A	A	A
Marker358078	B	B	B	B	A	A	B	B	A	A	B	B	B	A	B	B	B	A	B	B	A	B	B	B	X	A	B	A	A	A	B	A	X	A	A	B	A	B	B	A	B	B	B	A	H	B	A	A	A
Marker480873	B	B	B	B	A	A	B	B	A	A	B	B	B	A	B	B	B	A	B	B	A	B	B	B	X	A	B	A	A	A	B	A	B	A	A	B	A	B	B	X	B	B	B	A	A	B	A	A	A
Marker364416	B	B	B	B	A	A	B	B	A	A	B	B	B	A	B	B	B	A	B	B	A	B	B	B	B	A	B	A	X	A	B	A	B	A	A	B	A	B	B	B	B	B	B	A	A	B	A	A	A
Marker440781	B	B	B	B	A	A	B	B	A	A	B	B	B	A	B	B	B	A	B	B	A	B	B	B	B	A	B	A	A	A	B	A	B	A	A	B	A	B	B	B	B	B	B	A	A	B	A	A	A
Marker454968	B	B	B	B	A	A	B	B	A	A	B	B	B	A	B	B	B	A	B	B	A	B	B	B	B	A	B	A	X	A	B	A	X	A	A	B	A	B	B	B	B	B	B	A	A	B	A	A	A
Marker370312	B	B	B	B	A	A	B	B	A	A	B	B	B	A	B	B	B	A	B	B	A	B	B	B	B	A	B	A	A	A	B	A	X	A	A	B	A	B	B	B	B	B	B	A	A	B	A	A	A
Marker466959	B	B	B	B	A	A	B	B	A	A	B	B	B	A	B	B	B	A	B	B	A	B	B	B	B	A	B	A	A	A	B	A	X	A	A	B	A	B	B	B	B	B	B	A	A	B	A	A	A
Marker377956	B	B	B	B	A	A	B	B	A	A	B	B	B	A	B	B	B	A	B	B	A	B	B	B	B	A	B	A	X	A	B	A	B	A	A	B	A	B	B	B	B	B	B	A	A	B	A	A	A
Marker417222	B	B	B	B	A	A	B	B	A	A	B	B	B	A	B	B	B	A	B	B	A	B	B	B	B	A	B	A	X	A	B	A	B	A	A	B	A	B	B	B	B	B	B	A	A	B	A	A	A
Marker460399	B	B	B	B	A	A	B	B	A	A	B	B	B	A	B	B	B	A	B	B	A	B	B	B	B	A	B	A	A	A	B	A	X	A	A	B	A	B	B	B	B	B	B	A	A	B	A	A	A
Marker451414	B	B	B	B	A	A	B	B	A	A	B	B	B	A	B	B	B	A	B	B	A	B	B	B	B	A	B	A	X	A	B	A	B	A	A	B	A	B	B	B	B	B	B	A	A	B	A	A	A
Marker417666	B	B	B	B	A	A	B	B	A	A	B	B	B	A	B	B	B	A	B	B	A	B	B	B	B	A	B	A	A	A	B	A	B	A	A	B	A	B	B	B	B	B	B	A	A	B	A	A	A
Marker451538	B	B	B	B	A	A	B	B	A	A	B	B	B	A	B	B	B	A	B	B	A	B	B	B	B	A	B	A	A	A	B	A	B	A	A	B	A	B	B	B	B	B	B	A	A	B	A	A	A
Marker489547	B	B	B	B	A	A	B	B	A	A	B	B	B	A	B	B	B	A	B	B	A	B	B	B	B	A	B	A	A	A	B	A	B	A	A	B	A	B	B	B	B	B	B	A	A	B	A	A	A
Marker479265	B	B	B	B	A	A	B	B	A	A	B	B	B	A	B	B	B	A	B	B	A	B	B	B	B	A	B	A	A	A	B	A	B	A	A	B	A	B	B	B	B	B	B	A	A	B	A	A	A
Marker407714	B	B	B	B	A	A	B	B	A	A	B	B	B	A	B	B	B	A	B	B	A	B	B	B	B	A	B	A	X	A	B	A	B	A	A	B	A	B	B	B	B	B	B	A	A	B	A	A	A
Marker359659	B	B	B	B	A	A	B	B	A	A	B	B	B	A	B	B	B	A	B	B	A	B	B	B	B	A	B	A	X	A	B	A	B	A	A	B	A	B	B	B	B	B	B	A	A	B	A	A	A
Marker376270	B	B	B	B	A	A	B	B	A	A	B	B	B	A	B	B	B	A	B	B	A	B	B	B	B	A	B	A	B	A	B	A	B	A	A	B	A	B	B	B	B	B	B	A	A	B	A	A	A
Marker475880	B	B	B	B	A	A	B	B	A	A	B	B	B	A	B	B	B	A	B	B	A	B	B	B	B	A	B	A	B	A	B	A	B	A	A	B	A	B	B	B	B	B	B	A	A	B	A	A	A
Marker364158	B	B	B	B	A	A	B	B	A	A	B	B	B	A	B	B	B	A	B	B	A	B	B	B	B	A	B	A	X	A	B	A	B	A	A	B	A	B	B	B	B	B	B	A	A	B	A	A	A
Marker471768	B	B	B	B	A	A	B	B	A	A	B	B	B	A	B	B	B	A	B	B	A	B	B	B	B	A	B	A	X	A	B	A	B	A	A	B	A	B	B	B	B	B	B	A	A	B	A	A	A
Marker459842	B	B	B	B	A	A	B	B	A	A	B	B	B	A	B	B	B	A	B	B	X	B	B	B	B	A	B	A	X	A	B	A	B	A	A	B	A	B	B	B	B	B	B	A	A	B	A	A	A
Marker390598	B	B	B	B	A	A	B	B	A	A	B	B	B	A	B	B	B	A	A	B	A	B	B	B	B	A	B	A	B	A	B	A	B	A	A	B	A	B	B	B	A	B	B	A	A	B	A	A	A
Marker388749	B	B	B	B	A	A	B	B	A	A	B	B	B	A	B	B	B	A	A	B	A	B	B	B	B	A	B	A	B	A	B	A	B	A	A	B	A	B	B	B	A	B	B	A	A	B	A	A	A
Marker411561	B	B	B	B	A	A	B	B	A	A	B	B	B	A	B	B	B	A	A	B	X	B	B	B	B	A	B	A	B	A	B	A	B	A	A	B	A	B	B	B	A	B	B	A	A	B	A	A	A
Marker408304	B	B	B	B	A	A	B	B	A	A	B	B	B	A	B	B	B	A	A	B	B	B	B	B	B	A	B	A	B	A	B	A	B	A	A	B	A	B	B	B	A	B	B	A	A	B	A	A	A
Marker372559	B	B	B	B	A	A	B	B	A	A	B	B	B	A	B	B	B	A	A	B	B	B	B	B	B	A	B	A	B	A	B	A	B	A	A	B	A	B	B	B	A	B	B	A	A	B	A	A	A
Marker461243	B	B	B	B	A	A	B	B	A	A	B	B	B	A	B	B	B	A	A	B	B	B	B	B	B	A	B	A	B	A	B	A	B	A	A	B	A	B	B	B	A	B	B	A	A	B	A	A	A
Marker447890	B	B	B	B	A	A	B	B	A	A	B	B	B	A	B	B	B	A	A	B	B	B	B	B	B	A	B	A	B	A	B	A	B	A	A	B	A	B	B	B	A	B	B	A	A	B	A	A	A
Marker359271	B	B	B	B	A	A	B	B	A	A	B	B	B	A	B	B	B	A	A	B	B	B	B	B	B	A	B	A	B	A	B	A	B	A	A	B	A	B	B	B	A	B	B	A	A	B	A	A	A
Marker419150	B	B	B	B	A	A	B	B	A	A	B	B	B	A	B	B	B	A	A	B	B	B	B	B	B	A	B	A	B	A	B	A	B	A	A	B	A	B	B	B	A	B	B	A	A	B	A	A	A
Marker443226	B	B	B	B	A	A	B	B	A	A	B	B	B	A	B	B	B	A	A	B	B	B	B	B	B	A	B	A	B	A	B	A	B	A	A	B	A	B	B	B	A	B	B	A	A	B	A	A	A
Marker455613	B	B	B	B	A	A	B	B	A	A	B	B	B	A	B	B	B	A	A	B	B	B	B	B	B	A	B	A	B	A	B	A	B	A	A	B	A	B	B	B	A	B	B	A	A	B	A	A	A
Marker408916	B	B	B	B	A	A	B	B	A	A	B	B	B	A	B	B	B	A	A	B	B	B	B	B	B	A	B	A	B	A	B	A	B	A	A	B	A	B	B	B	A	B	B	A	A	B	A	A	A
Marker477150	B	B	B	B	A	A	B	B	A	A	B	B	B	A	B	B	B	A	A	B	B	B	B	B	B	A	B	A	B	A	B	A	B	A	A	B	A	B	B	B	A	B	B	A	A	B	A	A	A
Marker415374	B	B	B	B	A	A	B	B	A	A	B	B	B	A	B	B	B	A	A	B	B	B	B	B	B	A	B	A	B	A	B	A	B	A	A	B	A	B	B	B	A	B	B	A	A	B	A	A	A
Marker388898	B	B	B	B	A	A	B	B	A	A	B	B	B	A	B	B	B	A	A	B	B	B	B	B	B	A	B	A	B	A	B	A	B	A	A	B	A	B	B	B	A	B	B	A	H	B	A	A	A
Marker472461	B	B	B	B	A	A	B	B	A	A	B	B	B	A	B	B	B	A	A	B	B	B	B	B	B	A	B	A	X	A	B	A	B	A	A	B	A	B	B	B	A	B	B	A	H	B	A	A	A
Marker365140	B	B	B	B	A	A	B	B	A	A	B	B	B	A	B	B	B	A	A	B	B	B	B	B	B	A	B	A	B	A	B	A	B	A	A	B	A	B	B	B	A	B	B	A	H	B	A	A	A
Marker383717	B	B	B	B	A	A	B	B	A	A	B	B	B	A	B	B	B	A	A	B	B	B	B	B	B	A	B	A	B	A	B	A	B	A	A	B	A	B	B	B	A	B	B	A	H	B	A	A	A
Marker442969	B	B	B	B	A	A	B	B	A	A	B	B	B	A	B	B	B	A	A	B	B	B	B	B	B	A	B	A	A	A	B	A	B	A	A	B	A	B	B	B	A	B	B	A	H	B	A	A	A
Marker368100	B	B	B	B	A	A	B	B	A	A	B	B	B	A	B	B	B	A	A	B	B	B	B	B	B	A	B	A	A	A	B	A	B	A	A	B	A	B	B	B	A	B	B	A	H	B	A	A	A
Marker440896	B	B	B	B	A	A	B	B	A	A	B	B	B	A	B	B	B	A	A	B	B	B	B	B	B	A	B	A	A	A	B	A	B	A	A	B	A	B	B	B	A	B	B	A	A	B	A	A	A
Marker375612	B	B	B	B	A	A	B	B	A	A	B	B	B	A	B	B	B	A	A	B	B	B	B	B	B	A	B	A	A	A	B	A	B	A	A	B	A	B	B	B	A	B	B	A	A	B	A	A	A
Marker432061	B	B	B	B	A	A	B	B	A	A	B	B	B	A	B	B	B	A	A	B	B	B	B	B	B	A	B	A	A	A	B	A	B	A	A	B	A	B	B	B	A	B	B	A	A	B	A	A	A
Marker454481	B	B	B	B	A	A	B	B	A	A	B	B	B	A	B	B	B	A	A	B	B	B	B	B	B	A	B	A	B	A	B	A	B	A	A	B	A	B	B	B	A	B	B	A	A	B	A	A	A
Marker380777	B	B	B	B	A	A	B	B	A	A	B	B	B	A	B	B	B	A	A	B	B	B	B	B	B	A	B	A	B	A	B	A	B	A	A	B	A	B	B	B	A	B	B	A	A	B	A	A	A
Marker370971	B	B	B	B	A	A	B	B	A	A	B	B	B	A	B	B	B	A	A	B	B	B	B	B	B	A	B	A	B	A	B	A	B	A	A	B	A	B	B	B	A	B	B	A	A	B	A	A	A
Marker391768	B	B	B	B	A	A	B	B	A	A	B	B	B	A	B	B	B	A	A	B	B	B	B	B	B	A	B	A	B	A	B	A	B	A	A	B	A	B	B	B	A	B	B	A	A	B	A	A	A
Marker476142	B	B	B	B	A	A	B	B	A	A	B	B	B	A	B	B	B	A	A	B	B	B	B	B	B	A	B	A	B	A	B	A	B	A	A	B	A	B	B	B	A	B	B	A	A	B	A	A	A
Marker427014	B	B	B	B	A	A	B	B	A	A	B	B	B	A	B	B	B	A	A	B	B	B	B	B	B	A	B	A	B	A	B	A	B	A	A	B	A	B	B	B	A	B	B	A	A	B	A	A	A
Marker426555	B	B	B	B	A	A	B	B	A	A	B	B	B	A	B	B	B	A	A	B	B	B	B	B	B	A	B	A	B	A	B	A	B	A	A	B	A	B	B	B	A	B	B	A	A	B	A	A	A
Marker456227	B	B	B	B	A	A	B	B	A	A	B	B	B	A	B	B	B	A	A	B	B	B	B	B	B	A	B	A	B	A	B	A	B	A	A	B	A	B	B	B	A	B	B	A	A	B	A	A	A
Marker385470	B	B	B	B	A	A	B	B	A	A	B	B	B	A	B	B	B	A	A	B	B	B	B	B	B	A	B	A	B	A	B	A	B	A	A	B	A	B	B	B	A	B	B	A	A	B	A	A	A
Marker412675	B	B	B	B	A	A	B	B	A	A	B	B	B	A	B	B	B	A	A	B	B	B	B	B	B	A	B	A	B	A	B	A	B	A	A	B	A	B	B	B	A	B	B	A	A	B	A	A	A
Marker445837	B	B	B	B	A	A	B	B	A	A	B	B	B	A	B	B	B	A	A	B	B	B	B	B	X	A	B	A	B	A	B	A	B	A	A	B	A	B	B	B	A	B	B	A	A	B	A	A	A
Marker363915	B	B	B	B	A	A	B	B	A	A	B	B	B	A	B	B	B	A	A	B	B	B	B	B	X	A	B	A	B	A	B	A	B	A	A	B	A	B	B	B	A	B	B	A	A	B	A	A	A
Marker456270	B	B	B	B	A	A	B	B	A	A	B	B	B	A	B	B	B	A	A	B	B	B	B	B	B	A	B	A	B	A	B	A	B	A	A	B	A	B	B	B	A	B	B	A	A	B	A	A	A
Marker408786	B	B	B	B	A	A	B	B	A	A	B	B	B	A	B	B	B	A	A	B	B	B	B	B	X	A	B	A	B	A	B	A	B	A	A	B	A	B	B	B	A	B	B	A	A	B	A	A	A
Marker486451	B	B	B	B	A	A	B	B	A	A	B	B	B	A	B	B	B	A	A	B	B	B	B	B	X	A	B	A	B	A	B	A	B	A	A	B	A	B	B	B	A	B	B	A	A	B	A	A	A
Marker487474	B	B	B	B	A	A	B	B	A	A	B	B	B	A	B	B	B	A	A	B	B	B	B	B	B	A	B	A	B	A	B	A	B	A	A	B	A	B	B	B	A	B	B	A	A	B	A	A	A
Marker425467	B	B	B	B	A	A	B	B	A	A	B	B	B	A	B	B	B	A	A	B	B	B	B	B	X	A	B	A	B	A	B	A	B	A	A	B	A	B	B	B	A	B	B	A	A	B	A	A	A
Marker440378	B	B	B	B	A	A	B	B	A	A	B	B	B	A	B	B	B	A	A	B	B	B	B	B	B	A	B	A	B	A	B	A	B	A	A	B	A	B	B	B	A	B	B	A	A	B	A	A	A
Marker444758	B	B	B	B	A	A	B	B	A	A	B	B	B	A	B	B	B	A	A	B	B	B	B	B	B	A	B	A	B	A	B	A	B	A	A	B	A	B	B	B	A	B	B	A	A	B	A	A	A
Marker443658	B	B	B	B	A	A	B	B	A	A	B	B	B	A	B	B	B	A	A	B	B	B	B	B	X	A	B	A	B	A	B	A	B	A	A	B	A	B	B	B	A	B	B	A	A	B	A	A	A
Marker478257	B	B	B	B	A	A	B	B	A	A	B	B	B	A	B	B	B	A	A	B	B	B	B	B	B	A	B	A	B	A	B	A	B	A	A	B	A	B	B	B	A	B	B	A	A	B	A	A	A
Marker471600	B	B	B	B	A	A	B	B	A	A	B	B	B	A	B	B	B	A	A	B	B	B	B	B	B	A	B	A	B	A	B	A	B	A	A	B	A	B	B	H	A	B	B	A	A	B	A	A	A
Marker399751	B	B	B	B	A	A	B	B	A	A	B	B	B	A	B	B	B	A	A	B	B	B	B	B	B	A	B	A	B	A	B	A	B	A	A	B	A	B	B	H	A	B	B	A	A	B	A	A	A
Marker455317	B	B	B	B	A	A	B	B	A	A	B	B	B	A	B	B	B	A	A	B	B	B	B	B	B	A	B	A	B	A	B	A	B	A	A	B	A	B	B	A	A	B	B	A	A	B	A	A	A
Marker491353	B	B	B	B	A	A	B	B	A	A	B	B	B	A	B	B	B	A	A	B	B	B	B	B	B	A	B	A	X	A	B	A	B	A	A	B	A	B	B	A	A	B	B	A	A	B	A	A	A
Marker472452	B	B	B	B	A	A	B	B	A	A	B	B	B	A	B	B	B	A	A	B	B	B	B	B	X	A	B	A	X	A	B	A	B	A	A	B	A	B	B	A	A	B	B	A	A	B	A	A	A
Marker435604	B	B	B	B	A	A	B	B	A	A	B	B	B	A	B	B	B	A	A	B	B	B	B	B	X	A	B	A	B	A	B	A	B	A	A	B	A	B	B	A	A	B	B	A	A	B	A	A	A
Marker369368	B	B	B	B	A	A	B	B	A	A	B	B	B	A	B	B	B	A	A	B	B	B	B	B	B	A	B	A	B	A	B	A	B	A	A	B	A	B	B	H	A	B	B	A	A	B	A	A	A
Marker440557	B	B	B	B	A	A	B	B	A	A	B	B	B	A	B	B	B	A	A	B	B	B	B	B	X	A	B	A	B	A	B	A	X	A	A	B	A	B	B	H	A	B	B	A	A	B	A	A	A
Marker447755	B	B	B	B	A	A	B	B	A	A	B	B	B	A	B	B	B	A	A	B	B	B	B	B	X	A	B	A	X	A	B	A	X	A	A	B	A	B	B	H	A	B	B	A	A	B	A	A	A
Marker488229	B	B	B	B	A	A	B	B	A	A	B	B	B	A	B	B	B	A	A	B	B	B	B	B	X	A	B	A	B	A	B	A	X	A	A	B	A	B	B	H	A	B	B	A	A	B	A	A	A
Marker378179	B	B	B	B	A	A	B	B	A	A	B	B	B	A	B	B	B	A	A	B	B	B	B	B	B	A	B	A	B	A	B	A	B	A	A	B	A	B	B	H	A	B	B	A	A	B	A	A	A
Marker448211	B	B	B	B	A	A	B	B	A	A	B	B	B	A	B	B	B	A	A	B	B	B	B	B	X	A	B	A	X	A	B	A	B	A	A	B	A	B	B	A	A	B	B	A	A	B	A	A	A
Marker473264	B	B	B	B	A	A	B	B	A	A	B	B	B	A	B	B	B	A	A	B	B	B	B	B	X	A	B	A	B	A	B	A	X	A	A	B	A	B	B	A	A	B	B	A	A	B	A	A	A
Marker412147	B	B	B	B	A	A	B	B	A	A	B	B	B	A	B	B	B	A	A	B	X	B	B	B	X	A	B	A	X	A	B	A	X	A	A	B	A	B	B	A	A	B	B	A	A	B	A	A	A
Marker442489	B	B	B	B	A	A	B	B	A	A	B	B	B	A	B	B	B	A	A	B	H	B	B	B	B	A	B	A	B	A	B	A	X	A	A	B	A	B	B	A	A	B	B	A	A	B	A	A	A
Marker483418	B	B	B	B	A	A	B	B	A	A	B	B	B	A	B	B	B	A	A	B	X	B	B	B	B	A	B	A	X	A	B	A	B	A	A	B	A	B	B	A	A	B	B	A	A	B	A	A	A
Marker439058	B	B	B	B	A	A	B	B	A	A	B	B	B	A	B	B	B	A	A	B	H	B	B	B	B	A	B	A	B	A	B	A	X	A	A	B	A	B	B	A	A	B	B	A	A	B	A	A	A
Marker481940	B	B	B	B	A	A	B	B	A	A	B	B	B	A	B	B	B	A	A	B	B	B	B	B	B	A	B	A	X	A	B	A	X	A	A	B	A	B	B	A	A	B	B	A	A	B	A	A	A
Marker454804	B	B	B	B	A	A	B	B	A	A	B	B	B	A	B	B	B	A	A	B	H	B	B	B	B	A	B	A	X	A	B	A	B	A	A	B	A	B	B	A	A	B	B	A	A	B	A	A	A
Marker453609	B	B	B	B	A	A	B	B	A	A	B	B	B	A	B	B	B	A	A	B	B	B	B	B	B	A	B	A	B	A	B	A	B	A	A	B	A	B	B	A	A	B	B	A	A	B	A	A	A
Marker393485	B	B	B	B	A	A	B	B	A	A	B	B	B	A	B	B	B	A	A	B	H	B	B	B	B	A	B	A	B	A	B	A	B	A	A	B	A	B	B	A	A	B	B	A	A	B	A	A	A
Marker427619	B	B	B	B	A	A	B	B	A	A	B	B	B	A	B	B	B	A	A	B	H	B	B	B	B	A	B	A	B	A	B	A	B	A	A	B	A	B	B	A	A	B	B	A	A	B	A	A	A
Marker455457	B	B	B	B	A	A	B	B	A	A	B	B	B	A	B	B	B	A	A	B	X	B	B	B	B	A	B	A	B	A	B	A	X	A	A	B	A	B	B	A	A	B	B	A	A	B	A	A	A
Marker368924	B	B	B	B	A	A	B	B	A	A	B	B	B	A	B	B	B	A	A	B	H	B	B	B	B	A	B	A	B	A	B	A	X	A	A	B	A	B	B	A	A	B	B	A	A	B	A	A	A
Marker417880	B	B	B	B	A	A	B	B	A	A	B	B	B	A	B	B	B	A	A	B	B	B	B	B	B	A	B	A	X	A	B	A	B	A	A	B	A	B	B	A	A	B	B	A	A	B	A	A	A
Marker445595	B	B	B	B	A	A	B	B	A	A	B	B	B	A	B	B	B	A	A	B	B	B	B	B	B	A	B	A	B	A	B	A	B	A	A	B	A	B	B	A	A	B	B	A	A	B	A	A	A
Marker386403	B	B	B	B	A	A	B	B	A	A	B	B	B	A	B	B	B	A	A	B	H	B	B	B	B	A	B	A	B	A	B	A	B	A	A	B	A	B	B	A	A	B	B	A	A	B	A	A	A
Marker468367	B	B	B	B	A	A	B	B	A	A	B	B	B	A	B	B	B	A	A	B	H	B	B	B	B	A	B	A	B	A	B	A	B	A	A	B	A	B	B	A	A	B	B	A	A	B	A	A	A
Marker400910	B	B	B	B	A	A	B	B	A	A	B	B	B	A	B	B	B	A	A	B	H	B	B	B	B	A	B	A	X	A	B	A	B	A	A	B	A	B	B	A	A	B	B	A	A	B	A	A	A
Marker479107	B	B	B	B	A	A	B	B	A	A	B	B	B	A	B	B	B	A	A	B	B	B	B	B	B	A	B	A	B	A	B	A	X	A	A	B	A	B	B	A	A	B	B	A	A	B	A	A	A
Marker385054	B	B	B	B	A	A	B	B	A	A	B	B	B	A	B	B	B	A	A	B	B	B	B	B	B	A	B	A	X	A	B	A	B	A	A	B	A	B	B	A	A	B	B	A	A	B	A	A	A
Marker382361	B	B	B	B	A	A	B	B	A	A	B	B	B	A	B	B	B	A	A	B	B	B	B	B	B	B	B	A	B	A	B	A	X	A	A	B	A	B	B	A	A	B	B	A	A	A	A	A	A
Marker491888	B	B	B	B	A	A	B	B	A	A	B	B	B	A	B	B	B	A	A	B	B	B	B	B	B	B	B	A	B	A	B	A	B	A	A	B	A	B	B	A	A	B	B	A	A	A	A	A	A
Marker372715	B	B	B	B	A	A	B	B	A	A	B	B	B	A	B	B	B	A	A	B	X	B	B	B	B	B	B	A	X	A	B	A	X	A	A	B	A	B	B	A	A	B	B	A	A	A	A	A	A
Marker439040	B	B	B	B	A	A	B	B	A	A	B	B	B	A	B	B	B	A	A	B	A	B	B	B	B	B	B	A	B	A	B	A	X	A	A	B	A	B	B	A	A	B	B	A	A	A	A	A	A
Marker394915	B	B	B	B	A	A	B	B	A	A	B	B	B	A	B	B	B	A	A	B	A	B	B	B	B	B	B	A	B	A	B	A	X	A	A	B	A	B	B	A	A	B	B	A	A	A	A	A	A
Marker387324	B	B	B	B	A	A	B	B	A	A	B	B	B	A	B	B	B	A	A	B	A	B	B	B	B	B	B	A	X	A	B	A	B	A	A	B	A	B	B	A	A	B	B	A	A	A	A	A	A
Marker478115	B	B	B	B	A	A	B	B	A	A	B	B	B	A	B	B	B	A	A	B	A	B	B	B	B	B	B	A	B	A	B	A	X	A	A	B	A	B	B	A	A	B	B	A	A	A	A	A	A
Marker405976	B	B	B	B	A	A	B	B	A	A	B	B	B	A	B	B	B	A	A	B	A	B	B	B	B	B	B	A	B	A	B	A	B	A	A	B	A	B	B	A	A	B	B	A	A	A	A	A	A
Marker404841	B	B	B	B	A	A	B	B	A	A	B	B	B	A	B	B	B	A	A	B	A	B	B	B	B	B	B	A	B	A	B	A	B	A	A	B	A	B	B	A	A	B	B	A	A	A	A	A	A
Marker469255	B	B	B	B	A	A	B	B	A	A	B	B	B	A	B	B	B	A	A	B	A	B	B	B	B	B	B	A	B	A	B	A	B	A	A	B	A	B	B	A	A	B	B	A	A	A	A	A	A
Marker426557	B	B	B	B	A	A	B	B	A	A	B	B	B	A	B	B	B	A	A	B	A	B	B	B	B	B	B	A	B	A	B	A	X	A	A	B	A	B	B	A	A	B	B	A	A	A	A	A	A
Marker390458	B	B	B	B	A	A	B	B	A	A	B	B	B	A	B	B	B	A	A	B	A	B	B	B	B	B	B	A	B	A	B	A	B	A	A	B	A	B	B	A	A	B	B	A	A	A	A	A	A
Marker445201	B	B	B	B	A	A	B	B	A	A	B	B	B	A	B	B	B	A	A	B	A	B	B	B	B	B	B	A	B	A	B	A	B	A	A	B	A	B	B	A	A	B	B	A	A	A	A	A	A
Marker452047	B	B	B	B	A	A	B	B	A	A	B	B	B	A	B	B	B	A	A	B	A	B	B	B	B	B	B	A	B	A	B	A	B	A	A	B	A	B	B	A	A	B	B	A	A	A	A	A	A
Marker420759	B	B	B	B	A	A	B	B	A	A	B	B	B	A	B	B	B	A	A	B	A	B	B	B	B	B	B	A	B	A	B	A	B	A	A	B	A	B	B	A	A	B	B	A	A	A	A	A	A
Marker382350	B	B	B	B	A	A	B	B	A	A	B	B	B	A	B	B	B	A	A	B	A	B	B	B	B	B	B	A	B	A	B	A	B	A	A	B	A	B	B	A	A	B	B	A	A	A	A	A	A
Marker489419	B	B	B	B	A	A	B	B	A	A	B	B	B	A	B	B	B	A	A	B	A	B	B	B	B	B	B	A	B	A	B	A	B	A	A	B	A	B	B	A	A	B	B	A	A	A	A	A	A
Marker424295	B	B	B	B	A	A	B	B	A	A	B	B	B	A	B	B	B	A	A	B	A	B	B	B	B	B	B	A	B	A	B	A	B	A	A	B	A	B	B	A	A	B	B	A	A	A	A	A	A
Marker366304	B	B	B	B	A	A	B	B	A	A	B	B	B	A	B	B	B	A	A	B	A	B	B	B	B	B	B	A	B	A	B	A	B	A	A	B	A	B	B	A	A	B	B	A	A	A	A	A	A
Marker383094	B	B	B	B	A	A	B	B	A	A	B	B	B	A	B	B	B	A	A	B	A	B	B	B	B	B	B	A	B	A	B	A	B	A	A	B	A	B	B	A	A	B	B	A	A	A	A	A	A
Marker435712	B	B	B	B	A	A	B	B	A	A	B	B	B	A	B	B	B	A	A	B	A	B	B	B	B	B	B	A	B	A	B	A	B	A	A	B	A	B	B	A	A	B	B	A	A	A	A	A	A
Marker440265	B	B	B	B	A	A	B	B	A	A	B	B	B	A	B	B	B	A	A	B	A	B	B	B	B	B	B	A	B	A	B	A	B	A	A	B	A	B	B	A	A	B	B	A	A	A	A	A	A
Marker427018	B	B	B	B	A	A	B	B	A	A	B	B	B	A	B	B	B	A	A	B	A	B	B	B	B	B	B	A	B	A	B	A	B	A	A	B	A	B	B	A	A	B	B	A	A	A	A	A	A
Marker397291	B	B	B	B	A	A	B	B	A	A	B	B	B	A	B	B	B	A	A	B	A	B	B	B	B	B	B	A	B	A	B	A	B	A	A	B	A	B	B	A	A	B	B	A	A	A	A	A	A
Marker424500	B	B	B	B	A	A	B	B	A	A	B	B	B	A	B	B	B	A	A	B	A	B	B	B	B	B	B	A	B	A	B	A	B	A	A	B	A	B	B	A	A	B	B	A	A	A	A	A	A
Marker369721	B	B	B	B	A	A	B	B	A	A	B	B	B	A	B	B	B	A	A	B	A	B	B	B	B	B	B	A	B	A	B	A	B	A	A	B	A	B	B	A	A	B	B	A	A	A	A	A	A
Marker405346	B	B	B	B	A	A	B	B	A	A	B	B	B	A	B	B	B	A	A	B	A	B	B	B	B	B	B	A	B	A	B	A	B	A	A	B	A	B	B	A	A	B	B	A	A	A	A	A	A
Marker465401	B	B	B	B	A	A	B	B	A	A	B	B	B	A	B	B	B	A	A	B	A	B	B	B	B	B	B	A	B	A	B	A	B	A	A	B	A	B	B	A	A	B	B	A	A	A	A	A	A
Marker379239	B	B	B	B	A	A	B	B	A	A	B	B	B	A	B	B	B	A	A	B	A	B	B	B	B	B	B	A	B	A	B	A	B	A	A	B	A	B	B	A	A	B	B	A	A	A	A	A	A
Marker450020	B	B	B	B	A	A	B	B	A	A	B	B	B	A	B	B	B	A	A	B	A	B	B	B	B	B	B	A	B	A	B	A	B	A	A	B	A	B	B	A	A	B	B	A	A	A	A	A	A
Marker383083	B	B	B	B	A	A	B	B	A	A	B	B	B	A	B	B	B	A	A	B	A	B	B	B	B	B	B	A	B	A	B	A	B	A	A	B	A	B	B	A	A	B	B	A	A	A	A	A	A
Marker368604	B	B	B	B	A	A	B	B	A	A	B	B	B	A	B	B	B	A	A	B	A	B	B	B	B	B	B	A	B	A	B	A	B	A	A	B	A	B	B	A	A	B	B	A	A	A	A	A	A
Marker447770	B	B	B	B	A	A	B	B	A	A	B	B	B	A	B	B	B	A	A	B	A	B	B	B	B	B	B	A	B	A	B	A	B	A	A	B	A	B	B	A	A	B	B	A	A	A	A	A	A
Marker464257	B	B	B	B	A	A	B	B	A	A	B	B	B	A	B	B	B	A	A	B	A	B	B	B	B	B	B	A	B	A	B	A	B	A	A	B	A	B	B	A	A	B	B	A	A	A	A	A	A
Marker489310	B	B	B	B	A	A	B	B	A	A	B	B	B	A	B	B	B	A	A	B	A	B	B	B	B	B	B	A	B	A	B	A	B	A	A	B	A	B	B	A	A	B	B	A	A	A	A	A	A
Marker411392	B	B	B	B	A	A	B	B	A	A	B	B	B	A	B	B	B	A	A	B	A	B	B	B	B	B	B	A	B	A	B	A	B	A	A	B	A	B	B	A	A	B	B	A	A	A	A	A	A
Marker389973	B	B	B	B	A	A	B	B	A	A	B	B	B	A	B	B	B	A	A	B	A	B	B	B	B	B	B	A	B	A	B	A	B	A	A	B	A	B	B	A	A	B	B	A	A	A	A	A	A
Marker410225	B	B	B	B	A	A	B	B	A	A	B	B	B	A	B	B	B	A	A	B	A	B	B	B	B	B	B	A	B	A	B	A	B	A	A	B	A	B	B	A	A	B	B	A	A	A	A	A	A
Marker454689	B	B	B	B	A	A	B	B	A	A	B	B	B	A	B	B	B	A	A	B	A	B	B	B	B	B	B	A	B	A	B	A	B	A	A	B	A	B	B	A	A	B	B	A	A	A	A	A	A
Marker476053	B	B	B	B	A	A	B	B	A	A	B	B	B	A	B	B	B	A	A	B	A	B	B	B	B	B	B	A	B	A	B	A	B	A	A	B	A	B	B	A	A	B	B	A	A	A	A	A	A
Marker375849	B	B	B	B	A	A	B	B	A	A	B	B	B	A	B	B	B	A	A	B	A	B	B	B	B	B	B	A	B	A	B	A	B	A	A	B	A	B	B	A	A	B	B	A	A	A	A	A	A
Marker390047	B	B	B	B	A	A	B	B	A	A	B	B	B	A	B	B	B	A	A	B	A	B	B	B	B	B	B	A	B	A	B	A	B	A	A	B	A	B	B	A	A	B	B	A	A	A	A	A	A
Marker367685	B	B	B	B	A	A	B	B	A	A	B	B	B	A	B	B	B	A	A	B	A	B	B	B	B	B	B	A	B	A	B	A	B	A	A	B	A	B	B	A	A	B	B	A	A	A	A	A	A
Marker399239	B	B	B	B	A	A	B	B	A	A	B	B	B	A	B	B	B	A	A	B	A	B	B	B	B	B	B	A	B	A	B	A	B	A	A	B	A	B	B	A	A	B	B	A	A	A	A	A	A
Marker376667	B	B	B	B	A	A	B	B	A	A	B	B	B	A	B	B	B	A	A	B	A	B	B	B	B	B	B	A	B	A	B	A	B	A	A	B	A	B	B	A	A	B	B	A	A	A	A	A	A
Marker487802	B	B	B	B	A	A	B	B	A	A	B	B	B	A	B	B	B	A	A	B	A	B	B	B	B	B	B	A	B	A	B	A	B	A	A	B	A	B	B	A	A	B	B	A	A	A	A	A	A
Marker357709	B	B	B	B	A	A	B	B	A	A	B	B	B	A	B	B	B	A	A	B	A	B	B	B	B	B	B	A	B	A	B	A	B	A	A	B	A	B	B	A	A	B	B	A	A	A	A	A	A
Marker460877	B	B	B	B	A	A	B	B	A	A	B	B	B	A	B	B	B	A	A	B	A	B	B	B	B	B	B	A	B	A	B	A	B	A	A	B	A	B	B	A	A	B	B	A	A	A	A	A	A
Marker441608	B	B	B	B	A	A	B	B	A	A	B	B	B	A	B	B	B	A	A	B	A	B	B	B	B	B	B	A	B	A	B	A	B	A	A	B	A	B	B	A	A	B	B	A	A	A	A	A	A
Marker437875	B	B	B	B	A	A	B	B	A	A	B	B	B	A	B	B	B	A	A	B	A	B	B	B	B	B	B	A	B	A	B	A	B	A	A	B	A	B	B	A	A	B	B	A	A	A	A	A	A
Marker453334	B	B	B	B	A	A	B	B	A	A	B	B	B	A	B	B	B	A	A	B	A	B	B	B	B	B	B	A	B	A	B	A	B	A	A	B	A	B	B	A	A	B	B	A	A	A	A	A	A
Marker427661	B	B	B	B	A	A	B	B	A	A	B	B	B	A	B	B	B	A	A	B	A	B	B	B	B	B	B	A	B	A	B	A	B	A	A	B	A	B	B	A	A	B	B	A	A	A	A	A	A
Marker425339	B	B	B	B	A	A	B	B	A	A	B	B	B	A	B	B	B	A	A	B	A	B	B	B	B	B	B	A	B	A	B	A	B	A	A	B	A	B	B	A	A	B	B	A	A	A	A	A	A
Marker460898	B	B	B	B	A	A	B	B	A	A	B	B	B	A	B	B	B	A	A	B	A	B	B	B	B	B	B	A	B	A	B	A	B	A	A	B	A	B	B	A	A	B	B	A	A	A	A	A	A
Marker413488	B	B	B	B	A	A	B	B	A	A	B	B	B	A	B	B	B	A	A	B	A	B	B	B	B	B	B	A	B	A	B	A	B	A	A	B	A	B	B	A	A	B	B	A	A	A	A	A	A
Marker357684	B	B	B	B	A	A	B	B	A	A	B	B	B	A	B	B	B	A	A	B	A	B	B	B	B	B	B	A	B	A	B	A	B	A	A	B	A	B	B	A	A	B	B	A	A	A	A	A	A
Marker466486	B	B	B	B	A	A	B	B	A	A	B	B	B	A	B	B	B	A	A	B	A	B	B	B	B	B	B	A	B	A	B	A	B	A	A	B	A	B	B	A	A	B	B	A	A	A	A	A	A
Marker472889	B	B	B	B	A	A	B	B	A	A	B	B	B	A	B	B	B	A	A	B	A	B	B	B	B	B	B	A	B	A	B	A	B	A	A	B	A	B	B	A	A	B	B	A	A	A	A	A	A
Marker434109	B	B	B	B	A	A	B	B	A	A	B	B	B	A	B	B	B	A	A	B	A	B	B	B	B	B	B	A	B	A	B	A	B	A	A	B	A	B	B	A	A	B	B	A	A	A	A	A	A
Marker387452	B	B	B	B	A	A	B	B	A	A	B	B	B	A	B	B	B	A	A	B	A	B	B	B	B	B	B	A	B	A	B	A	B	A	A	B	A	B	B	A	A	B	B	A	A	A	A	A	A
Marker488069	B	B	B	B	A	A	B	B	A	A	B	B	B	A	B	B	B	A	A	B	A	B	B	B	B	B	B	A	B	A	B	A	B	A	A	B	A	B	B	A	A	B	B	A	A	A	A	A	A
Marker470448	B	B	B	B	A	A	B	B	A	A	B	B	B	A	B	B	B	A	A	B	A	B	B	B	B	B	B	A	B	A	B	A	B	A	A	B	A	B	B	A	A	B	B	A	A	A	A	A	A
Marker396287	B	B	B	B	A	A	B	B	A	A	B	B	B	A	B	B	B	A	A	B	A	B	B	B	B	B	B	A	B	A	B	A	B	A	A	B	A	B	B	A	A	B	B	A	A	A	A	A	A
Marker410650	B	B	B	B	A	A	B	B	A	A	B	B	B	A	B	B	B	A	A	B	A	B	B	B	B	B	B	A	B	A	B	A	X	A	A	B	A	B	B	A	A	B	B	A	A	A	A	A	A
Marker491143	B	B	B	B	A	A	B	B	A	A	B	B	B	A	B	B	B	A	A	B	A	B	B	B	B	B	B	A	B	A	B	A	A	A	A	B	A	B	B	A	A	B	B	A	A	A	A	A	A
Marker481816	B	B	B	B	A	A	B	B	A	A	B	B	B	A	B	B	B	A	A	B	A	B	B	B	B	B	B	A	B	A	B	A	X	A	A	B	A	B	B	A	A	B	B	A	A	A	A	A	A
Marker477777	B	B	B	B	A	A	B	B	A	A	B	B	B	A	B	B	B	A	A	B	A	B	B	B	B	B	B	A	B	A	B	A	X	A	A	B	A	B	B	A	A	B	B	A	A	A	A	A	A
Marker444073	B	B	B	B	A	A	B	B	A	A	B	B	B	A	B	B	B	A	A	B	A	B	B	B	B	B	B	A	B	A	B	A	X	A	A	B	A	B	B	A	A	B	B	A	A	A	A	A	A
Marker411688	B	B	B	B	A	A	B	B	A	A	B	B	B	A	B	B	B	A	A	B	A	B	B	B	B	B	B	A	B	A	B	A	A	A	A	B	A	B	B	A	A	B	B	A	A	A	A	A	A
Marker473265	B	B	B	B	A	A	B	B	A	A	B	B	B	A	B	B	B	A	A	B	A	B	B	B	B	B	B	A	B	A	B	A	A	A	A	B	A	B	B	A	A	B	B	A	A	A	A	A	A
Marker455145	B	B	B	B	A	A	B	B	A	A	B	B	B	A	B	B	B	A	A	B	A	B	B	B	B	B	B	A	B	A	B	A	A	A	A	B	A	B	B	A	A	B	B	A	A	A	A	A	A
Marker398457	B	B	B	B	A	A	B	B	A	A	B	B	B	A	B	B	B	A	A	B	A	B	B	B	B	B	B	A	B	A	B	A	A	A	A	B	A	B	B	A	A	B	B	A	A	A	A	A	A
Marker363416	B	B	B	B	A	A	B	B	A	A	B	B	B	A	B	B	B	A	A	B	A	B	B	B	B	B	B	A	B	A	B	A	A	A	A	B	A	B	B	A	A	B	B	A	A	A	A	A	A
Marker443840	B	B	B	B	A	A	B	B	A	A	B	B	B	A	B	B	B	A	A	B	A	B	B	B	B	B	B	A	B	A	B	A	X	A	A	B	A	B	B	A	A	B	B	A	A	A	A	A	A
Marker389958	B	B	B	B	A	A	B	B	A	A	B	B	B	A	B	B	B	A	A	B	A	B	B	B	B	B	B	A	B	A	B	A	A	A	A	B	A	B	B	A	A	B	B	A	A	A	A	A	A
Marker358784	B	B	B	B	A	A	B	B	A	A	B	B	B	A	B	B	B	A	A	B	A	B	B	B	B	B	B	A	B	A	B	A	A	A	A	B	A	B	B	A	A	B	B	A	A	A	A	A	A
Marker414361	B	B	B	B	A	A	B	B	A	A	B	B	B	A	B	B	B	A	A	B	A	B	B	B	B	B	B	A	B	A	B	A	X	A	A	B	A	B	B	A	A	B	B	A	A	A	A	A	A
Marker421732	B	B	B	B	A	A	B	B	A	A	B	B	B	A	B	B	B	A	A	B	A	B	B	B	B	B	B	A	B	A	B	A	X	A	A	B	A	B	B	A	A	B	B	A	A	A	A	A	A
Marker365705	B	B	B	B	A	A	B	B	A	A	B	B	B	A	B	B	B	A	A	B	A	B	B	B	B	B	B	A	B	A	B	A	X	A	A	B	A	B	B	A	A	B	B	A	A	A	A	A	A
Marker401036	B	B	B	B	A	A	B	B	A	A	B	B	B	A	B	B	B	A	A	B	A	B	B	B	B	B	B	A	B	A	B	A	A	A	A	B	A	B	B	A	A	B	B	A	A	A	A	A	A
Marker406343	B	B	B	B	A	A	B	B	A	A	B	B	B	A	B	B	B	A	A	B	A	B	B	B	B	B	B	A	B	A	B	A	A	A	A	B	A	B	B	A	A	B	B	A	A	A	A	A	A
Marker439086	B	B	B	B	A	A	B	B	A	A	B	B	B	A	B	B	B	A	A	B	A	B	B	B	B	B	B	A	B	A	B	A	X	A	A	B	A	B	B	A	A	B	B	A	A	A	A	A	A
Marker414462	B	B	B	B	A	A	B	B	A	A	B	B	B	A	B	B	B	A	A	B	A	B	B	B	B	B	B	A	B	A	B	A	A	A	A	B	A	B	B	A	A	B	B	A	A	A	A	A	A
Marker404410	B	B	B	B	A	A	B	B	A	A	B	B	B	A	B	B	B	A	A	B	A	B	B	B	B	B	B	A	B	A	B	A	A	A	A	B	A	B	B	A	A	B	B	A	A	A	A	A	A
Marker467478	B	B	B	B	A	A	B	B	A	A	B	B	B	A	B	B	B	A	A	B	A	B	B	B	B	B	B	A	B	A	B	A	A	A	A	B	A	B	B	A	A	B	B	A	A	A	A	A	A
Marker407679	B	B	B	B	A	A	B	B	A	A	B	B	B	A	B	B	B	A	A	B	A	B	B	B	B	B	B	A	B	A	B	A	A	A	A	B	A	B	B	A	A	B	B	A	A	A	A	A	A
Marker416756	B	B	B	B	A	A	B	B	A	A	B	B	B	A	B	B	B	A	A	B	A	B	B	B	B	B	B	A	B	A	B	A	A	A	A	B	A	B	B	A	A	B	B	A	A	A	A	A	A
Marker410240	B	B	B	B	A	A	B	B	A	A	B	B	B	A	B	B	B	A	A	B	A	B	B	B	B	B	B	A	B	A	B	A	A	A	A	B	A	B	B	A	A	B	B	A	A	A	A	A	A
Marker478339	B	B	B	B	A	A	B	B	A	A	B	B	B	A	B	B	B	A	A	B	A	B	B	B	B	B	B	A	B	A	B	A	A	A	A	B	A	B	B	A	A	B	B	A	A	A	A	A	A
Marker441709	B	B	B	B	A	A	B	B	A	A	B	B	B	A	B	B	B	A	A	B	A	B	B	B	B	B	B	A	B	A	B	A	A	A	A	B	A	B	B	A	A	B	B	A	A	A	A	A	A
Marker430087	B	B	B	B	A	A	B	B	A	A	B	B	B	A	B	B	B	A	A	B	A	B	B	B	B	B	B	A	B	A	B	A	A	A	A	B	A	B	B	A	A	B	B	A	A	A	A	A	A
Marker364727	B	B	B	B	A	A	B	B	A	A	B	B	B	A	B	B	B	A	A	B	A	B	B	B	B	B	B	A	B	A	B	A	A	A	A	B	A	B	B	A	A	B	B	A	A	A	A	A	A
Marker451686	B	B	B	B	A	A	B	B	A	A	B	B	B	A	B	B	B	A	A	B	A	B	B	B	B	B	B	A	B	A	B	A	A	A	A	B	A	B	B	A	A	B	B	A	A	A	A	A	A
Marker454273	B	B	B	B	A	A	B	B	A	A	B	B	B	A	B	B	B	A	A	B	A	B	B	B	B	B	B	A	B	A	B	A	A	A	A	B	A	B	B	A	A	B	B	A	A	A	A	A	A
Marker454175	B	B	B	B	A	A	B	B	A	A	B	B	B	A	B	B	B	A	A	B	A	B	B	B	B	B	B	A	B	A	B	A	A	A	A	B	A	B	B	A	A	B	B	A	A	A	A	A	A
Marker489558	B	B	B	B	A	A	B	B	A	A	B	B	B	A	B	B	B	A	A	B	A	B	B	B	B	B	B	A	B	A	B	A	A	A	A	B	A	B	B	A	A	B	B	A	A	A	A	A	A
Marker476750	B	B	B	B	A	A	B	B	A	A	B	B	B	A	B	B	B	A	A	B	A	B	B	B	B	B	B	A	B	A	B	A	A	A	A	B	A	B	B	A	X	B	B	A	A	A	A	A	A
Marker463190	B	B	B	B	A	A	B	B	A	A	B	B	B	A	B	B	B	A	A	B	A	B	B	B	B	B	B	A	B	A	B	A	A	A	A	B	A	B	B	A	B	B	B	A	A	A	A	A	A
Marker411753	B	B	B	B	A	A	B	B	A	A	B	B	B	A	B	B	B	A	A	B	A	B	B	B	B	B	B	A	B	A	B	A	A	A	A	B	A	B	B	A	B	B	B	A	A	A	A	A	A
Marker450871	B	B	B	B	A	A	B	B	A	A	B	B	B	A	B	B	B	A	A	B	A	B	B	B	B	B	B	A	B	A	B	A	A	A	A	B	A	B	B	A	B	B	B	A	A	A	A	A	A
Marker432337	B	B	B	B	A	A	B	B	A	A	B	B	B	A	B	B	B	A	A	B	A	B	B	B	B	B	B	A	B	A	B	A	A	A	A	B	A	B	B	A	B	B	B	A	A	A	A	A	A
Marker449597	B	B	B	B	A	A	B	B	A	A	B	B	B	A	B	B	B	A	A	B	A	B	B	B	B	B	B	A	B	A	B	A	A	A	A	B	A	B	B	A	B	B	B	A	A	A	A	A	A
Marker459697	B	B	B	B	A	A	B	B	A	A	B	B	B	A	B	B	B	A	A	B	A	B	B	B	B	B	B	A	X	A	B	A	A	A	A	B	A	B	B	A	B	B	B	A	A	A	A	A	A
Marker371133	B	B	B	B	A	A	B	B	A	A	B	B	B	A	B	B	B	A	A	B	A	B	B	B	B	B	B	A	A	A	B	A	X	A	A	B	A	B	B	A	B	B	B	A	A	A	A	A	A
Marker394598	B	B	B	B	A	A	B	B	A	A	B	B	B	A	B	B	B	A	A	B	A	B	B	B	B	B	B	A	A	A	B	A	B	A	A	B	A	B	B	A	B	B	B	A	A	A	A	A	A
Marker415753	B	B	B	B	A	A	B	B	A	A	B	B	B	A	B	B	B	A	A	B	A	B	B	B	B	B	B	A	A	A	B	A	B	A	A	B	A	B	B	A	B	B	B	A	A	A	A	A	A
Marker427798	B	B	B	B	A	A	B	B	A	A	B	B	B	A	B	B	B	A	A	B	A	B	B	B	B	B	B	A	A	A	B	A	B	A	A	B	A	B	B	A	B	B	B	A	A	A	A	A	A
Marker461283	B	B	B	B	A	A	B	B	A	A	B	B	B	A	B	B	B	A	A	B	A	B	B	B	B	B	A	A	A	A	B	A	B	A	A	B	A	B	B	A	B	B	B	A	A	A	A	A	A
Marker464296	B	B	B	B	A	A	B	B	A	A	B	B	B	A	B	B	B	A	A	B	A	B	B	B	B	B	A	A	A	A	B	A	B	A	A	B	A	B	B	A	B	B	B	A	A	A	A	A	A
Marker489276	B	B	B	B	A	A	B	B	A	A	B	B	B	A	B	B	B	A	A	B	A	B	B	B	B	B	A	A	A	A	B	A	X	A	A	B	A	B	B	A	B	B	B	A	A	A	A	A	A
Marker457860	B	B	B	B	A	A	B	B	A	A	B	B	B	A	B	B	B	A	A	B	A	B	B	B	B	B	A	A	A	A	B	A	B	A	A	B	A	B	B	A	B	B	B	A	A	A	A	A	A
Marker402704	B	B	B	B	A	A	B	B	A	A	B	B	B	A	B	B	B	A	A	B	A	B	B	B	B	B	A	A	A	A	B	A	B	A	A	B	A	B	B	A	B	B	B	A	A	A	A	A	A
Marker455349	B	B	B	B	A	A	B	B	A	A	B	B	B	A	B	B	B	A	A	B	A	B	B	B	X	B	A	A	A	A	B	A	X	A	A	B	A	B	B	A	B	B	B	A	A	A	A	A	A
Marker447470	B	B	B	B	A	A	B	B	A	A	B	B	B	A	B	B	B	A	A	B	A	B	B	B	X	B	B	A	A	A	B	A	X	A	A	B	A	B	B	A	B	B	B	A	A	A	A	A	A
Marker394493	B	B	B	B	A	A	B	B	A	A	B	B	B	A	B	B	B	A	A	B	A	B	B	B	B	B	B	A	A	A	B	A	B	A	A	B	A	B	B	A	B	B	B	A	A	A	A	A	A
Marker445932	B	B	B	B	A	A	B	B	A	A	B	B	B	A	B	B	B	A	A	B	A	B	B	B	X	B	B	A	A	A	B	A	B	A	A	B	A	B	B	A	B	B	B	A	A	A	A	A	A
Marker483034	B	B	B	B	A	A	B	B	A	A	B	B	B	A	B	B	B	A	A	B	A	B	B	B	X	B	B	A	A	A	B	A	X	A	A	B	A	B	B	A	B	B	B	A	A	A	A	A	A
Marker486087	B	B	B	B	A	A	B	B	A	A	B	B	B	A	B	B	B	A	A	B	A	B	B	B	B	B	B	A	A	A	B	A	B	A	A	B	A	B	B	A	B	B	B	A	A	A	A	A	A
Marker400432	B	B	B	B	A	A	B	B	A	A	B	B	B	A	B	B	B	A	A	B	A	B	B	B	B	B	B	A	A	A	B	A	B	A	A	B	A	B	B	A	B	B	B	A	A	A	A	A	A
Marker390437	B	B	B	B	A	A	B	B	A	A	B	B	B	A	B	B	B	A	A	B	A	B	B	B	X	B	B	A	A	A	B	A	X	A	A	B	A	B	B	A	B	B	B	A	A	A	A	A	A
Marker484401	B	B	B	B	A	A	B	B	A	A	B	B	B	A	B	B	B	A	A	B	A	B	B	B	B	B	B	A	A	A	B	A	B	A	A	B	A	B	B	A	B	B	B	A	A	A	A	A	A
Marker427642	B	B	B	B	A	A	B	B	A	A	B	B	B	A	B	B	B	A	A	B	A	B	B	B	B	B	B	A	A	A	B	A	B	A	A	B	A	B	B	A	B	B	B	A	A	A	A	A	A
Marker393560	B	B	B	B	A	A	B	B	A	A	B	B	B	A	B	B	B	A	A	B	A	B	B	B	B	B	B	A	A	A	B	A	X	A	A	B	A	B	B	A	B	B	B	A	A	A	A	A	A
Marker439914	B	B	B	B	A	A	B	B	A	A	B	B	B	A	B	B	B	A	A	B	A	B	B	B	B	B	B	A	A	A	B	A	X	A	A	B	A	B	B	A	B	B	B	A	A	A	A	A	A
Marker380205	B	B	B	B	A	A	B	B	A	A	B	B	B	A	B	B	B	A	A	B	A	B	B	B	B	B	B	A	A	A	B	A	B	A	A	B	A	B	B	A	B	B	B	A	A	A	A	A	A
Marker415097	B	B	B	B	A	A	B	B	A	A	B	B	B	A	B	B	B	A	A	B	A	B	B	B	B	B	B	A	A	A	B	A	B	A	A	B	A	B	B	A	B	B	B	A	A	A	A	A	A
Marker393252	B	B	B	B	A	A	B	B	A	A	B	B	B	A	B	B	B	A	A	B	A	B	B	B	B	B	B	A	A	A	B	A	X	A	A	B	A	B	B	A	B	B	B	A	A	A	A	A	A
Marker376196	B	B	B	B	A	A	B	B	A	A	B	B	B	A	B	B	B	A	A	B	A	B	B	B	B	B	B	A	A	A	B	A	B	A	A	B	A	B	B	A	B	B	B	A	A	A	A	A	A
Marker393177	B	B	B	B	A	A	B	B	A	A	B	B	B	A	B	B	B	A	A	B	A	B	B	B	B	B	B	A	A	A	B	A	B	A	A	B	A	B	B	A	B	B	B	A	A	A	A	A	A
Marker430189	B	B	B	B	A	A	B	B	A	A	B	B	B	A	B	B	B	A	A	B	A	B	B	B	B	B	B	A	A	A	B	A	B	A	A	B	A	B	B	A	B	B	B	A	A	A	A	A	A
Marker362008	B	B	B	B	A	A	B	B	A	A	B	B	B	A	B	B	B	A	A	B	A	B	B	B	B	B	B	A	A	A	B	A	B	A	A	B	A	B	B	A	B	B	B	A	A	A	A	A	A
Marker396899	B	B	B	B	A	A	B	B	A	A	B	B	B	A	B	B	B	A	A	B	A	B	B	B	B	B	B	A	A	A	B	A	X	A	A	B	A	B	B	A	B	B	B	A	A	A	A	A	A
Marker423867	B	B	B	B	A	A	B	B	A	A	B	B	B	A	B	B	B	A	A	B	A	B	B	B	B	B	B	A	A	A	B	A	X	A	A	B	A	B	B	A	B	B	B	A	A	A	A	A	A
Marker409667	B	B	B	B	A	A	B	B	A	A	B	B	B	A	B	B	B	A	A	B	A	B	B	B	B	B	B	A	A	A	B	A	X	A	A	B	A	B	B	A	B	B	B	A	A	A	A	A	A
Marker375540	B	B	B	B	A	A	B	B	A	A	B	B	B	A	B	B	B	A	A	B	A	B	B	B	B	B	B	A	A	A	B	A	X	A	A	B	A	B	B	A	B	B	B	A	A	A	A	A	A
Marker412270	B	B	B	B	A	A	B	B	A	A	B	B	B	A	B	B	B	A	A	B	A	B	B	B	B	B	B	A	A	A	B	A	B	A	A	B	A	B	B	A	B	B	B	A	A	A	A	A	A
Marker447016	B	B	B	B	A	A	B	B	A	A	B	B	B	A	B	B	B	A	A	B	A	B	B	B	B	B	B	A	A	A	B	A	B	A	A	B	A	B	B	A	B	B	B	A	A	A	A	A	A
Marker489460	B	B	B	B	A	A	B	B	A	A	B	B	B	A	B	B	B	A	A	B	A	B	B	B	B	B	B	A	A	A	B	A	B	A	A	B	A	B	B	A	B	B	B	A	A	A	A	A	A
Marker378818	B	B	B	B	A	A	B	B	A	A	B	B	B	A	B	B	B	A	A	B	A	B	B	B	B	B	B	A	A	A	B	A	B	A	A	B	A	B	B	A	B	B	B	A	H	A	A	A	A
Marker371764	B	B	B	B	A	A	B	B	A	A	B	B	B	A	B	B	B	A	A	B	A	B	B	B	X	B	A	A	A	A	B	A	X	A	A	B	A	B	B	A	B	B	B	A	X	A	A	X	A
Marker358813	B	B	B	B	A	A	B	B	A	A	B	B	B	A	B	B	B	A	A	B	A	B	B	B	X	B	A	A	A	A	B	A	X	A	A	B	A	B	B	A	B	B	B	A	A	X	A	B	A
Marker435009	B	B	B	B	A	A	B	B	A	A	B	B	B	A	X	B	B	A	A	B	A	B	B	B	B	B	A	A	X	A	B	A	B	A	A	B	A	B	B	A	B	B	B	A	X	B	A	B	A
Marker490937	B	B	B	B	A	A	B	B	A	A	B	B	B	A	B	B	B	A	A	B	A	B	B	B	B	B	A	A	B	A	B	A	B	A	A	B	A	B	B	A	B	B	B	A	H	B	A	B	A
Marker394448	B	B	B	B	A	A	B	B	A	A	B	B	B	A	B	B	B	A	A	B	A	B	B	B	B	B	A	A	B	A	B	A	X	A	A	B	A	B	B	A	B	B	B	A	H	B	A	B	A
Marker460878	B	B	B	B	A	A	B	B	A	A	B	B	B	A	X	B	B	A	A	B	A	B	B	B	B	B	A	A	B	A	B	A	B	A	A	B	A	B	B	A	B	B	B	A	A	B	A	B	A
Marker442801	B	B	B	B	A	A	B	B	A	A	B	B	B	A	B	B	B	A	A	B	A	B	B	B	B	B	A	A	X	A	B	A	B	A	A	B	A	B	B	A	B	B	B	A	H	B	A	B	A
Marker471766	B	B	B	B	A	A	B	B	A	A	B	B	B	A	B	B	B	A	A	B	A	B	B	B	B	B	A	A	B	A	B	A	B	A	A	B	A	B	B	A	B	B	B	A	A	B	A	B	A
Marker426304	B	B	B	B	A	A	B	B	A	A	B	B	B	A	X	B	B	A	A	B	A	B	B	B	B	B	A	A	B	A	B	A	X	A	B	B	A	B	B	A	B	B	B	A	H	B	A	B	A
Marker411328	B	B	B	B	A	A	B	B	A	A	B	B	B	A	X	B	B	A	A	B	A	B	B	B	B	B	A	A	B	A	B	A	X	A	B	B	A	B	B	A	B	B	B	A	X	B	A	B	A
Marker391726	B	B	B	B	A	A	B	B	A	A	B	B	B	A	B	B	B	A	A	B	A	B	B	B	B	B	A	A	B	A	B	A	B	A	B	B	A	B	B	A	B	B	B	A	X	B	A	B	A
Marker487199	B	B	B	B	A	A	B	B	A	A	B	B	B	A	X	B	B	A	A	B	A	B	B	B	B	B	A	A	B	A	B	A	X	A	B	B	A	B	B	A	B	B	B	A	A	B	A	B	A
Marker396906	B	B	B	B	A	B	B	B	A	A	B	B	B	A	X	B	B	A	A	B	A	B	B	B	B	B	A	A	X	A	B	A	B	A	B	A	A	B	B	A	B	B	B	A	A	B	A	B	A
Marker407898	B	B	B	B	A	B	B	B	A	A	B	B	B	A	B	B	B	A	A	A	A	B	A	B	B	B	A	A	A	A	B	A	B	A	B	A	A	B	B	A	B	B	B	A	A	B	A	B	A
Marker400876	B	B	B	B	A	B	B	A	A	A	B	B	B	A	X	B	B	A	A	A	A	B	X	B	B	B	A	A	A	A	B	A	X	A	B	A	A	B	B	A	B	B	B	X	A	B	A	B	A
Marker464842	B	B	B	B	A	B	B	X	A	A	B	B	B	A	X	B	B	A	A	A	A	B	A	B	B	B	A	A	X	A	B	A	B	A	B	A	A	B	B	A	B	B	B	A	A	B	A	B	A
Marker482896	B	B	B	B	A	B	B	A	A	A	B	B	B	A	B	B	B	A	A	A	A	B	A	B	B	B	A	A	A	A	B	A	X	A	B	A	A	B	B	A	B	B	B	B	A	B	A	B	A
Marker478562	B	B	B	B	A	B	B	X	A	A	B	A	B	A	X	B	B	A	A	A	A	B	A	B	B	B	A	A	X	A	B	A	X	A	B	A	A	B	B	A	B	B	B	X	A	B	A	B	A
Marker374100	B	B	B	B	A	B	B	A	A	A	B	X	B	A	B	B	B	A	A	A	A	B	A	B	B	B	A	A	X	A	B	A	B	A	B	A	A	B	B	A	B	B	B	X	A	B	A	B	A
Marker425581	B	B	B	B	A	B	B	A	A	A	B	A	B	A	B	B	B	A	A	A	A	B	A	B	B	B	A	A	X	A	B	A	X	A	B	A	A	B	B	A	B	B	B	B	A	B	A	B	A
Marker423569	B	B	B	B	A	B	B	A	A	A	B	A	B	A	B	B	B	A	A	A	A	B	A	B	B	B	A	A	A	A	B	A	B	A	B	A	B	B	B	A	B	B	B	B	A	B	A	B	A
Marker450228	B	B	B	B	A	B	B	A	A	A	B	A	B	A	B	B	B	A	A	A	A	B	A	B	B	B	A	A	B	A	B	A	B	A	B	A	B	B	B	A	B	B	B	B	A	B	A	B	A
Marker478470	B	B	B	B	A	B	B	A	A	A	B	A	B	A	X	B	B	A	A	A	A	B	A	B	B	B	A	A	B	A	B	A	B	A	B	A	B	B	B	A	B	B	B	B	A	B	A	B	A
Marker381724	B	B	B	B	A	B	B	A	A	A	B	A	B	A	X	B	B	A	A	A	A	B	A	B	B	B	A	A	B	A	B	A	B	A	B	A	B	B	B	A	B	B	B	B	A	B	A	B	A
Marker456749	B	B	B	B	A	B	B	A	A	A	B	A	B	A	B	B	B	A	A	A	A	B	A	B	B	B	A	A	X	A	B	A	B	A	B	A	B	B	B	A	B	B	B	B	A	B	A	B	A
Marker430960	B	B	B	B	A	B	B	A	A	A	B	A	B	A	B	B	B	A	A	A	A	B	A	B	B	B	A	A	B	A	B	A	B	A	B	A	B	B	B	A	B	B	B	B	A	B	A	B	A
Marker426830	B	B	B	B	A	B	B	A	A	A	B	A	B	A	B	B	B	A	A	A	A	B	A	B	B	B	A	A	X	A	B	A	B	A	B	A	B	B	B	A	B	B	B	B	A	B	A	B	A
Marker457340	B	B	B	B	A	B	B	A	A	A	B	A	B	A	X	B	B	A	A	A	B	B	A	B	B	B	A	A	X	A	B	A	B	A	B	A	B	B	B	A	B	B	B	B	A	B	A	B	A
Marker463373	B	B	B	B	A	B	B	A	A	A	B	A	B	A	B	B	B	A	A	A	X	B	A	B	B	B	A	A	X	A	B	A	B	A	B	A	B	B	B	A	B	B	B	B	A	B	A	B	A
Marker387153	B	B	B	B	A	B	B	A	A	A	B	A	B	A	B	B	B	A	A	A	B	B	A	B	B	B	A	A	B	A	B	A	B	A	B	A	B	B	B	A	B	B	B	B	A	B	A	B	A
Marker395683	B	B	B	B	X	B	B	A	A	A	B	A	B	A	B	B	B	A	A	A	X	B	A	B	B	B	A	A	B	A	B	A	B	A	B	A	B	B	X	A	B	X	B	B	A	A	A	B	A
Marker369138	B	B	B	B	H	B	B	A	A	A	B	A	B	B	A	A	B	X	B	A	B	B	A	B	B	A	A	A	A	A	A	A	B	A	B	A	B	A	A	A	B	A	B	B	B	A	B	A	A
Marker386758	B	B	B	B	X	B	B	A	A	A	B	A	B	B	X	A	B	B	B	A	B	B	A	B	B	A	A	A	X	A	A	A	B	A	B	A	B	A	A	A	B	A	B	B	B	A	B	A	A
Marker428998	B	B	B	B	H	B	B	A	A	A	B	A	B	B	A	A	B	B	B	A	B	B	A	B	B	A	A	A	A	A	A	A	B	A	B	A	B	A	A	A	B	A	B	B	B	A	B	A	A
Marker377187	B	B	B	B	H	B	B	A	A	A	B	A	B	B	X	X	B	B	B	A	B	B	A	B	B	X	A	A	X	A	A	A	B	A	B	A	B	A	A	A	B	A	B	B	B	A	B	A	A
Marker481532	B	B	B	B	A	B	B	A	A	A	B	A	B	B	A	A	B	X	B	A	B	B	A	B	B	A	A	A	A	A	A	A	B	A	B	A	B	A	A	A	B	A	B	B	B	A	B	A	A
Marker437942	B	B	B	A	A	A	B	A	A	A	B	A	B	B	A	A	B	B	B	A	B	B	A	B	B	A	A	A	A	A	A	A	B	A	B	A	B	A	A	A	B	A	B	B	B	A	B	A	A
Marker422132	B	B	B	A	X	A	B	A	A	A	B	A	B	B	X	A	B	B	B	A	B	B	A	B	B	A	A	A	A	A	A	A	B	A	B	A	B	A	A	A	B	A	B	B	B	A	B	A	A
Marker358960	B	B	B	A	A	A	B	A	A	A	B	A	B	B	A	B	B	B	B	A	B	B	A	B	B	A	A	A	A	A	B	A	B	A	B	A	B	A	A	A	B	A	B	B	B	A	B	A	A
Marker436497	B	B	B	A	A	A	B	A	A	A	B	A	B	B	A	B	B	B	B	A	B	B	A	B	B	A	A	A	A	A	B	A	B	A	B	A	B	A	A	A	B	A	B	B	B	A	B	A	A
Marker490011	B	B	B	A	A	A	B	A	A	A	B	A	B	B	A	B	B	B	B	A	B	B	A	B	B	A	A	A	A	A	B	A	B	A	B	A	B	A	A	A	B	A	B	B	B	A	B	A	A
Marker106119	B	B	B	B	A	A	A	B	B	B	B	B	B	B	X	B	B	A	A	A	B	A	B	B	A	B	A	A	X	B	B	B	X	A	A	B	B	A	A	B	A	B	A	B	B	A	B	B	B
Marker14806	B	B	B	B	X	A	A	B	B	X	B	B	B	B	A	B	B	A	A	A	B	A	B	B	X	B	A	A	X	B	B	B	A	A	A	B	B	A	A	B	A	B	A	B	X	A	B	B	B
Marker30227	B	B	B	B	A	A	A	B	B	B	B	B	B	B	X	B	B	A	A	A	B	A	B	B	X	B	A	A	A	B	B	B	X	A	A	B	B	A	A	B	A	B	A	B	B	A	B	B	B
Marker63969	B	B	B	B	X	A	X	B	B	B	B	B	B	B	X	B	B	A	A	A	B	A	X	B	X	B	A	A	X	B	B	B	X	A	A	B	B	A	A	B	A	B	A	B	B	X	B	X	B
Marker7604	B	B	B	B	A	A	A	B	B	B	B	B	B	B	A	B	A	A	A	A	B	A	B	B	A	B	A	A	A	B	B	B	A	A	A	B	B	B	A	B	A	B	A	B	B	A	B	B	B
Marker69128	B	B	B	B	A	A	B	B	B	A	B	B	B	B	A	B	A	A	A	A	B	A	A	B	A	B	A	A	A	B	A	B	A	A	A	B	B	B	A	B	A	A	A	B	B	B	B	A	B
Marker10390	B	B	B	B	A	A	B	B	B	A	B	B	B	B	A	B	A	A	A	A	B	A	A	B	A	B	A	A	A	B	A	B	A	A	A	B	B	B	A	B	A	A	A	B	A	B	B	A	B
Marker6746	B	B	B	B	X	A	B	B	B	A	B	B	B	B	A	B	A	A	A	A	B	A	A	B	A	B	A	A	X	B	A	B	X	A	A	B	B	B	A	B	A	A	A	B	A	B	B	A	B
Marker98736	B	B	B	B	A	A	B	B	B	A	B	B	B	B	A	B	A	A	A	A	B	A	A	B	X	B	X	A	X	B	X	B	X	A	A	B	B	B	A	B	A	A	A	B	X	B	B	A	B
Marker44421	B	B	B	B	X	A	X	B	B	A	B	B	B	B	A	B	A	A	A	A	B	A	A	B	A	B	A	A	A	B	A	B	A	A	A	B	B	B	A	B	A	A	A	B	A	B	B	A	B
Marker52066	B	B	B	B	X	A	X	B	B	A	B	B	B	A	A	B	A	A	A	A	B	A	A	B	X	B	B	A	X	B	A	B	X	A	A	B	B	B	A	B	A	A	A	B	A	B	B	A	B
Marker114709	B	B	B	B	A	A	X	B	B	A	B	B	B	A	X	B	A	A	A	A	B	A	A	B	A	B	B	A	A	X	A	B	A	A	A	B	B	B	A	B	A	A	A	B	A	B	B	A	B
Marker59209	B	B	B	B	A	A	B	B	B	A	B	B	B	A	A	B	A	A	A	A	B	A	A	B	A	B	B	B	A	B	A	B	A	A	A	B	B	B	A	A	A	A	A	B	A	B	B	A	B
Marker624	B	B	B	B	A	A	X	B	B	A	B	B	B	A	X	B	X	A	A	A	B	A	A	B	X	B	B	B	A	B	A	B	X	A	A	B	B	B	A	B	A	A	A	B	A	B	B	A	B
Marker36042	B	B	B	B	A	A	B	B	B	A	B	B	B	A	X	B	A	A	A	A	B	A	A	B	A	B	B	B	A	A	A	B	A	A	A	B	B	B	A	A	A	A	A	B	A	B	B	A	B
Marker33629	B	B	B	B	A	A	B	B	B	A	B	B	B	A	A	B	A	A	A	A	B	A	A	B	A	B	B	B	X	A	A	B	X	A	A	B	B	B	A	A	A	A	B	B	A	B	B	A	B
Marker54657	B	B	B	B	A	A	B	B	B	A	B	B	B	A	A	X	B	A	A	A	B	A	A	B	A	B	B	B	X	A	A	B	X	A	A	B	B	B	A	A	A	A	B	B	A	B	B	A	B
Marker50379	B	B	B	B	A	A	B	B	B	A	B	B	B	A	X	B	B	A	A	A	B	A	A	B	X	B	B	B	X	X	X	B	X	A	X	B	B	B	A	A	A	A	B	B	A	B	B	A	B
Marker50287	B	B	B	B	A	A	B	B	B	A	B	B	B	A	X	B	B	A	A	A	B	A	A	B	A	B	B	B	A	A	A	B	X	A	B	B	B	B	A	A	A	A	B	B	A	B	B	A	B
Marker34806	B	B	B	B	A	A	X	B	B	A	B	B	B	A	A	B	B	A	A	A	B	A	A	B	A	B	B	B	B	A	A	B	X	A	B	B	B	B	A	A	A	A	B	B	A	B	B	A	B
Marker86703	B	B	B	B	A	B	B	B	B	A	B	B	B	A	X	A	B	A	A	A	B	X	A	B	X	B	B	B	A	A	B	B	X	A	B	B	B	B	A	A	A	A	B	B	A	B	B	A	B
Marker84197	B	B	B	B	A	B	B	B	B	B	B	B	B	A	A	A	B	A	A	A	B	A	A	B	A	B	B	B	X	A	X	B	A	A	B	B	B	B	A	A	A	A	B	B	A	B	B	A	B
Marker72696	B	B	B	B	A	B	A	B	B	B	B	B	B	A	X	A	B	A	A	A	B	X	A	B	X	B	B	B	B	A	B	B	X	A	B	B	B	B	A	A	A	A	B	B	A	B	B	A	A
Marker117796	B	B	B	B	A	B	A	B	B	B	B	B	B	A	A	A	B	A	A	A	B	B	A	B	A	B	B	B	B	A	B	B	A	A	B	B	B	B	A	A	A	A	B	B	A	B	B	A	X
Marker50583	X	B	B	B	A	B	X	B	B	B	B	B	B	B	A	X	B	A	A	A	B	B	A	B	A	A	B	B	X	A	X	B	X	A	B	B	B	B	A	A	A	A	B	B	A	B	B	A	A
Marker9378	B	B	A	B	A	B	X	B	B	B	B	B	B	B	X	A	B	A	A	A	B	B	A	B	X	A	B	B	A	A	B	B	A	A	B	B	B	B	A	A	A	A	B	B	A	B	B	A	A
Marker18591	B	B	A	B	A	B	A	B	B	B	B	B	B	B	A	A	B	A	A	A	B	B	A	B	A	A	B	B	B	A	B	B	A	A	B	B	B	B	A	A	A	A	B	B	A	B	B	A	A
Marker87021	X	A	A	B	A	B	X	B	B	B	B	B	B	B	A	A	B	A	A	A	B	B	A	B	X	A	B	B	B	A	B	B	X	A	B	B	A	B	A	A	A	A	B	B	A	B	B	A	A
Marker57456	A	A	A	B	A	B	A	B	B	B	B	B	B	B	A	A	B	A	A	A	B	B	A	B	X	A	B	B	B	A	B	B	A	A	B	B	A	B	A	A	A	A	B	B	A	B	B	A	A
Marker8742	A	A	A	B	A	B	A	B	B	B	B	B	B	B	A	A	B	A	A	A	B	B	A	B	A	A	B	B	X	A	B	B	A	A	B	B	A	B	A	A	A	A	B	B	A	B	B	A	A
Marker48540	A	A	A	B	A	B	A	B	B	B	B	B	B	B	X	A	B	A	A	A	B	B	A	B	X	A	B	B	X	A	B	B	X	A	B	B	A	B	A	A	A	A	B	B	A	B	B	A	A
Marker35604	A	A	A	B	A	B	X	B	B	B	B	B	B	B	X	A	B	A	A	A	B	B	A	B	X	A	B	B	X	A	B	B	A	A	B	B	A	B	A	A	A	A	B	B	A	B	B	A	A
Marker79002	A	A	A	B	A	B	X	B	B	B	B	B	B	B	A	A	B	A	A	A	B	B	A	B	A	A	B	B	X	A	B	B	X	A	B	B	A	B	A	A	A	A	B	B	A	B	B	A	A
Marker72060	A	A	A	B	A	B	X	B	B	B	B	B	B	B	A	X	B	A	A	A	B	B	A	B	A	A	B	B	A	A	B	B	X	A	B	B	A	B	A	A	A	A	B	B	A	B	B	A	A
Marker26977	A	A	A	B	A	B	X	B	B	B	B	B	B	B	A	A	B	A	A	A	B	B	A	B	X	A	B	B	X	A	B	B	X	A	B	B	A	B	A	A	A	A	B	B	A	B	B	A	A
Marker76824	A	A	A	B	A	B	A	B	B	B	B	B	B	B	X	A	B	A	A	A	B	B	A	B	X	A	B	B	A	A	B	B	A	A	B	B	A	B	A	A	A	A	B	B	A	B	B	A	A
Marker9747	A	A	A	B	B	B	A	B	B	B	B	B	B	B	X	A	B	A	A	A	B	B	A	B	X	A	B	B	X	A	B	B	A	A	B	B	A	B	A	A	A	A	B	B	A	B	B	A	A
Marker86502	A	A	A	B	A	B	A	B	B	B	B	B	B	B	A	A	B	A	A	A	B	B	A	B	A	A	B	B	B	A	B	B	A	A	B	B	A	B	A	A	A	A	B	B	A	B	B	A	A
Marker40823	A	A	A	B	A	B	A	B	A	B	B	B	B	B	A	A	B	A	A	A	B	B	A	B	A	A	B	B	B	A	B	B	A	A	B	B	A	B	A	A	A	A	B	B	A	B	B	A	A
Marker17558	A	A	A	B	A	B	A	B	A	B	B	B	B	B	X	B	A	A	A	A	X	B	A	B	A	A	B	B	X	A	B	B	X	A	B	B	A	B	A	A	A	A	B	B	A	B	B	A	A
Marker101599	A	A	A	B	X	B	X	B	X	B	B	B	B	B	X	B	X	A	A	A	X	B	A	B	X	A	B	B	B	A	B	B	X	A	B	B	A	B	A	A	A	A	B	B	A	B	B	A	A
Marker68283	A	A	A	B	A	B	X	B	A	B	B	B	X	B	X	B	A	A	A	A	A	B	A	B	X	A	B	B	B	A	B	B	A	A	B	B	A	B	A	A	A	A	B	B	A	B	B	A	A
Marker40964	A	A	A	B	B	B	X	B	A	B	B	B	B	B	B	B	A	A	A	A	A	B	A	B	X	B	B	B	B	A	B	B	X	A	X	B	A	A	A	A	A	A	B	B	A	B	B	A	A
Marker53089	A	A	A	B	B	B	A	B	A	B	B	B	A	B	B	B	A	A	A	A	A	B	A	B	A	B	B	B	B	A	B	A	X	A	A	B	A	A	A	A	A	A	B	B	A	B	B	A	A
Marker2498	A	A	A	B	B	B	A	B	A	B	B	B	A	B	X	B	A	A	A	A	A	B	A	B	X	B	B	B	A	A	B	A	X	A	A	B	A	A	A	A	A	A	B	B	A	B	B	A	A
Marker42010	A	A	A	B	B	B	A	B	A	B	B	B	A	B	X	B	A	A	A	A	A	B	A	B	A	B	B	B	A	A	B	A	A	A	A	B	A	A	A	A	A	A	B	B	A	B	B	A	A
Marker117894	A	A	A	B	B	B	A	B	H	B	B	B	A	B	H	B	A	A	A	A	A	B	A	B	A	B	B	B	A	A	B	A	A	A	A	B	A	A	A	A	A	A	B	B	A	B	B	A	A
Marker73946	A	A	A	B	B	B	A	B	H	B	B	B	A	B	B	B	A	A	A	A	A	B	A	B	A	B	B	B	A	A	B	A	A	A	A	B	A	A	A	A	A	A	B	B	A	B	B	A	A
Marker53147	A	A	A	B	B	B	A	B	H	B	B	B	A	B	H	B	A	A	A	A	A	B	A	B	A	B	B	B	B	A	B	A	A	A	A	B	A	A	A	A	A	A	B	B	A	B	B	A	A
Marker83746	A	A	A	B	B	B	A	B	H	B	B	B	A	B	H	B	A	A	A	A	A	B	A	B	A	B	B	B	B	A	B	A	X	A	A	B	A	A	A	A	A	A	B	B	A	B	B	A	A
Marker85241	A	A	A	B	B	B	A	B	X	B	B	B	A	B	X	B	A	A	A	A	A	B	A	B	A	B	B	B	B	A	B	A	A	A	A	B	A	A	A	A	A	A	B	B	A	B	B	A	A
Marker13523	A	A	A	B	B	B	A	B	H	B	B	B	A	B	H	B	A	A	A	A	A	B	A	B	A	B	B	B	B	A	B	A	X	A	A	B	A	A	A	A	A	A	B	B	A	B	B	A	A
Marker67926	A	A	A	B	B	B	A	B	H	B	B	B	A	B	X	B	A	A	A	A	A	B	A	B	A	B	B	B	B	A	B	A	X	A	A	B	A	A	A	A	A	A	B	B	A	B	B	A	A
Marker19863	A	A	A	B	B	B	A	B	X	B	B	B	A	B	X	B	A	A	A	A	A	B	A	B	A	B	B	B	X	A	B	A	X	A	A	B	A	A	A	A	A	A	B	B	A	B	B	A	A
Marker93863	A	A	A	B	B	B	A	B	H	B	B	B	A	B	A	B	A	A	A	A	A	B	A	B	A	B	B	B	A	A	B	A	A	A	A	B	A	A	A	A	A	A	B	B	A	B	B	A	A
Marker101383	A	A	A	B	B	B	A	B	H	B	B	B	A	B	A	B	A	A	A	A	A	B	A	B	A	B	B	B	B	A	B	A	A	A	A	B	A	A	A	A	A	A	B	B	A	B	B	A	A
Marker86650	A	A	A	B	B	B	A	B	A	B	B	B	A	B	A	B	A	A	A	A	A	B	A	B	A	B	B	B	B	A	B	A	X	A	A	B	A	A	A	A	A	A	B	B	A	B	B	A	A
Marker81079	A	A	A	B	B	B	A	B	A	B	B	B	A	B	A	B	A	A	A	A	A	B	A	B	A	B	B	B	X	A	B	A	A	A	A	B	A	A	A	A	A	A	B	B	A	B	B	A	A
Marker8831	A	A	A	B	B	B	A	B	X	B	B	B	A	B	A	A	A	A	A	A	A	B	A	B	A	B	B	B	B	A	B	A	A	A	A	B	A	A	A	A	A	A	B	B	A	B	B	A	A
Marker113814	A	A	A	B	B	B	A	B	A	B	B	B	A	B	A	A	A	A	A	A	A	B	A	B	A	B	B	B	B	A	B	A	A	A	A	B	A	A	A	A	A	A	B	B	A	B	B	A	A
Marker20188	A	A	A	B	B	B	A	B	X	B	B	B	A	B	A	A	A	A	A	A	A	B	A	B	A	B	B	B	B	A	B	A	A	A	A	B	A	A	A	A	A	A	B	B	A	B	B	A	A
Marker92227	A	A	A	B	B	B	A	B	A	B	B	B	A	B	A	A	A	A	A	A	A	B	A	B	A	B	B	B	A	A	B	A	A	A	A	B	A	A	A	A	A	A	B	B	A	B	B	A	A
Marker63919	A	A	A	B	B	B	A	B	A	B	B	B	A	B	A	A	A	A	A	A	A	B	A	B	A	B	B	B	X	A	B	A	A	A	A	B	A	A	A	A	A	A	B	B	A	B	B	A	A
Marker45476	A	A	A	B	B	B	A	B	A	B	B	B	A	B	A	A	A	A	A	A	A	B	A	B	A	B	B	B	A	A	B	A	A	A	A	B	A	A	A	A	A	A	B	B	A	B	B	A	A
Marker25882	A	A	A	B	B	B	A	B	A	B	B	B	A	B	A	A	A	A	A	A	A	B	A	B	A	B	B	B	A	A	B	A	A	A	A	B	A	A	A	A	A	A	B	B	A	B	B	A	A
Marker58112	A	A	A	B	B	B	A	B	A	B	B	B	A	B	A	A	A	A	A	A	A	B	A	B	A	B	B	B	A	A	B	A	A	A	A	B	A	A	A	A	A	A	B	B	A	B	B	A	A
Marker106580	A	A	A	B	B	B	A	B	A	B	B	B	A	B	A	A	A	A	A	A	A	B	A	B	A	B	B	B	A	A	B	A	A	A	A	B	A	A	A	A	A	A	B	B	A	B	B	A	A
Marker66802	A	A	A	B	B	B	A	B	A	B	B	B	A	B	A	A	A	A	A	A	A	B	A	B	A	B	B	B	A	A	B	A	A	A	A	B	A	A	A	A	A	A	B	B	A	B	B	A	A
Marker79849	A	A	A	B	B	B	A	B	A	B	B	B	A	B	A	A	A	A	A	A	A	B	A	B	A	B	B	B	A	A	B	A	A	A	A	B	A	A	A	A	A	A	B	B	A	B	B	A	A
Marker116208	A	A	A	B	B	B	A	B	A	B	B	B	A	B	A	A	A	A	A	A	A	B	A	B	A	B	B	B	A	A	B	A	A	A	A	B	A	A	A	A	A	A	B	B	A	B	B	A	A
Marker43301	A	A	A	B	B	B	A	B	A	B	B	B	A	B	A	A	A	A	A	A	A	B	A	B	A	B	B	B	A	A	B	A	A	A	A	B	A	A	A	A	A	A	B	B	A	B	B	A	A
Marker73248	A	A	A	B	B	B	A	B	A	B	B	B	A	B	A	A	A	A	A	A	A	B	A	B	A	B	B	B	A	A	B	A	A	A	A	B	A	A	A	A	A	A	B	B	A	B	B	A	A
Marker97399	A	A	A	B	B	B	A	B	A	B	B	B	A	B	A	A	A	A	A	A	A	B	A	B	A	B	B	B	A	A	B	A	A	A	A	B	A	A	A	A	A	A	B	B	A	B	B	A	A
Marker51135	A	A	A	B	B	B	A	B	A	B	B	B	A	B	A	A	A	A	A	A	A	B	A	B	A	B	B	B	A	A	B	A	A	A	A	B	A	A	A	A	A	A	B	B	A	B	B	A	A
Marker7634	A	A	A	B	B	B	A	B	A	B	B	B	A	B	A	A	A	A	A	A	A	B	A	B	A	B	B	B	A	A	B	A	A	A	A	B	A	A	A	A	A	A	B	B	A	B	B	A	A
Marker19293	A	A	A	B	B	B	A	B	A	B	B	B	A	B	A	A	A	A	A	A	A	B	A	B	A	B	B	B	A	A	B	A	A	A	A	B	A	A	A	A	A	A	B	B	A	B	B	A	A
Marker63436	A	A	A	B	B	B	A	B	A	B	B	B	A	B	A	A	A	A	A	A	A	B	A	B	A	B	B	B	A	A	B	A	A	A	A	B	A	A	A	A	A	A	B	B	A	B	B	A	A
Marker60539	A	A	A	B	B	B	A	B	A	B	B	B	A	B	A	A	A	A	A	A	A	B	A	B	A	B	B	B	A	A	B	A	A	A	A	B	A	A	A	A	A	A	B	B	A	B	B	A	A
Marker96666	A	A	A	B	B	B	A	B	A	B	B	B	A	B	A	A	A	A	A	A	A	B	A	B	A	B	B	B	A	A	B	A	A	A	A	B	A	A	A	A	A	A	B	B	A	B	B	A	A
Marker63266	A	A	A	B	B	B	A	B	A	B	B	B	A	B	A	A	A	A	A	A	A	B	A	B	A	B	B	B	A	A	B	A	A	A	A	B	A	A	A	A	A	A	B	B	A	B	B	A	A
Marker42200	A	A	A	B	B	B	A	B	A	B	B	B	A	B	A	A	A	A	A	A	A	B	A	B	A	B	B	B	A	A	B	A	A	A	A	B	A	A	A	A	A	A	B	B	A	B	B	A	A
Marker76464	A	A	A	B	B	B	A	B	X	B	B	B	A	B	A	A	A	A	A	A	A	B	A	B	A	B	B	B	A	A	B	A	A	A	A	B	A	A	A	A	A	A	B	B	A	B	B	A	A
Marker58275	A	A	A	B	X	B	A	B	X	B	B	B	A	B	A	A	A	A	A	A	A	B	A	B	A	B	B	B	A	A	B	A	A	A	A	B	A	A	A	A	A	A	B	B	A	B	B	A	A
Marker18543	A	A	A	B	A	B	A	B	X	B	B	B	A	B	A	A	A	A	A	A	A	B	A	B	A	B	B	B	X	A	B	A	A	A	A	B	B	A	A	A	A	A	B	B	A	B	B	A	A
Marker38265	A	A	A	B	A	B	A	B	B	B	B	B	A	B	A	A	A	A	A	A	A	B	A	B	A	B	B	B	X	A	B	A	A	A	A	B	B	A	A	A	A	A	B	B	A	B	B	A	A
Marker51151	A	A	A	B	A	B	A	B	B	B	B	B	A	B	A	A	A	A	A	A	A	B	A	B	A	B	B	B	B	A	B	A	A	A	A	B	B	A	A	A	A	A	B	B	A	B	B	A	A
Marker117694	A	A	A	B	H	B	A	B	B	B	B	B	A	A	A	A	A	A	A	A	A	B	A	B	A	B	B	B	B	A	B	A	A	A	A	B	B	A	A	A	A	A	B	B	A	B	B	A	A
Marker114537	A	A	A	B	X	B	A	B	B	B	B	B	A	A	A	A	A	A	A	A	A	B	A	B	A	B	B	B	A	A	B	A	A	A	A	B	B	A	A	A	A	A	B	B	A	B	B	A	A
Marker82518	A	A	A	B	A	B	A	B	B	B	B	B	A	A	A	A	A	A	A	A	A	B	A	B	A	B	B	B	A	A	B	A	A	A	A	B	B	A	A	A	A	A	B	B	A	B	B	A	A
Marker110795	A	A	A	B	H	B	A	B	X	B	B	B	A	A	A	A	A	A	A	A	A	B	A	B	A	B	B	B	X	A	B	A	A	A	A	B	B	A	A	A	A	A	B	B	A	B	B	A	A
Marker83632	A	A	A	B	H	B	A	B	A	B	B	B	A	A	A	A	A	A	A	A	A	B	A	B	A	B	B	B	A	A	B	A	A	A	A	B	B	A	A	A	A	A	B	B	A	B	B	A	A
Marker17705	A	A	A	B	A	B	A	B	A	B	B	B	A	A	A	A	A	A	A	A	A	B	A	B	A	B	B	B	X	A	B	A	A	A	A	B	B	A	A	A	A	A	B	B	A	B	B	A	A
Marker45871	A	A	A	B	A	B	A	B	X	B	B	B	A	A	A	A	A	A	A	A	A	B	A	B	A	B	B	B	B	A	B	A	A	A	A	B	B	A	A	A	A	A	B	B	A	B	B	A	A
Marker29980	A	A	A	B	A	B	A	B	X	B	B	B	A	A	A	A	A	A	A	A	A	B	A	B	A	B	B	B	B	A	B	A	A	A	A	B	B	A	A	A	A	A	B	B	A	B	B	A	A
Marker46875	A	A	A	B	H	B	A	B	A	B	B	B	A	A	A	A	A	A	A	A	A	B	A	B	A	B	B	B	B	A	B	A	A	A	A	B	B	A	A	A	A	A	B	B	A	B	B	A	A
Marker4677	A	A	A	B	H	B	A	B	A	B	B	B	A	A	A	A	A	A	A	A	A	B	A	B	A	B	B	B	B	A	B	A	A	A	A	B	B	A	A	A	A	A	B	B	A	B	B	A	A
Marker117258	A	A	A	B	X	B	A	B	A	B	B	B	A	A	A	A	A	A	A	A	A	B	A	B	A	B	B	B	B	A	B	A	A	A	A	B	B	A	A	A	A	A	B	B	A	B	B	A	A
Marker65700	A	A	A	B	X	B	A	A	A	B	B	A	A	A	A	A	A	A	A	A	A	B	A	B	A	B	B	B	A	A	B	A	A	A	A	B	B	A	A	A	A	A	B	B	A	B	B	A	A
Marker105311	A	A	A	B	A	B	A	A	A	B	B	A	A	A	A	A	A	A	A	A	A	B	A	B	A	B	B	B	B	A	B	A	A	A	A	B	B	A	A	A	A	A	B	B	A	B	B	A	A
Marker21433	A	A	A	B	H	B	A	A	A	B	B	A	A	A	A	A	A	A	A	A	A	B	A	B	A	B	B	B	B	A	B	A	A	A	A	B	B	A	A	A	A	A	B	B	A	B	B	A	A
Marker56219	A	A	A	B	H	B	A	A	A	B	B	A	A	A	A	A	A	A	A	A	A	B	A	B	A	B	B	B	A	A	B	A	A	B	A	B	B	A	A	A	A	A	B	B	A	B	B	A	A
Marker109990	A	A	A	B	B	B	A	A	A	B	B	A	A	A	A	A	A	A	A	A	A	B	A	B	A	B	B	B	X	A	B	A	A	B	A	B	B	A	A	A	A	A	B	B	A	B	B	A	A
Marker47644	A	A	A	B	B	B	A	A	A	B	B	A	A	A	A	A	A	A	A	A	A	B	A	B	X	B	B	B	B	A	B	A	A	B	A	B	B	A	A	A	A	A	B	B	A	B	B	A	A
Marker26600	A	A	A	B	B	A	A	A	A	B	B	A	A	A	A	A	A	A	A	A	A	B	A	B	X	B	B	B	A	A	B	A	A	B	A	B	B	A	A	A	A	A	B	B	A	B	B	A	A
Marker24965	A	A	A	B	H	A	A	A	A	B	B	A	A	A	A	A	A	A	A	A	A	B	A	B	A	B	B	B	A	A	B	A	A	B	A	B	B	A	A	A	A	A	B	B	A	B	B	A	A
Marker46496	A	A	A	B	X	A	A	A	A	B	B	A	A	A	A	A	A	A	A	A	A	B	A	B	A	B	B	B	X	A	B	A	A	B	A	B	B	A	A	A	A	A	B	B	A	B	B	A	A
Marker10134	A	A	A	B	H	X	A	A	A	B	B	A	A	A	A	A	A	A	A	A	A	B	A	B	X	B	B	B	A	A	B	A	A	B	A	B	B	A	A	A	A	A	B	B	A	B	B	A	A
Marker96599	A	A	A	B	H	A	A	A	A	B	B	A	A	A	A	A	A	A	A	A	A	B	A	B	B	B	B	B	X	A	B	A	A	B	A	B	B	A	A	A	A	A	B	B	A	B	B	A	A
Marker44845	A	A	A	B	B	A	A	A	A	B	B	A	A	A	A	A	A	A	A	A	A	B	A	B	B	B	B	B	X	A	B	A	A	B	A	B	B	A	A	A	A	A	B	B	A	B	B	A	A
Marker85760	A	A	A	B	B	A	A	A	A	B	B	A	A	A	A	A	A	A	A	A	A	B	A	B	B	B	B	B	B	A	B	A	A	B	A	B	B	A	A	A	A	A	B	B	A	B	B	A	A
Marker56096	A	A	A	B	B	A	A	A	A	B	B	A	A	A	A	A	A	A	A	A	A	B	A	B	B	B	B	B	B	A	B	A	A	B	A	B	B	A	A	A	A	A	B	B	A	B	B	A	A
Marker93144	A	A	A	B	B	A	A	A	A	B	B	A	A	A	A	A	A	A	A	A	A	B	A	B	B	B	B	B	B	A	B	A	A	B	A	B	B	A	A	A	A	A	B	B	A	B	B	A	A
Marker64857	A	A	A	B	B	A	A	A	A	B	B	A	A	A	A	A	A	A	A	A	A	B	A	B	B	B	B	B	B	A	B	A	A	B	A	B	B	A	A	A	A	A	B	B	A	B	B	A	A
Marker56719	A	A	A	B	H	A	A	A	A	B	B	A	A	A	A	A	A	A	A	A	A	B	A	B	B	B	B	B	B	A	B	A	A	B	A	B	B	A	A	A	A	A	B	B	A	B	B	A	A
Marker74591	A	A	A	B	H	A	A	A	A	B	B	A	A	A	A	A	A	A	A	A	A	B	A	B	B	B	B	B	B	A	B	A	A	B	A	B	B	A	A	A	A	A	B	B	A	B	B	A	A
Marker44510	A	A	A	B	H	A	A	A	A	B	B	A	A	A	A	A	A	A	A	A	A	B	A	B	B	B	B	B	B	A	B	A	A	B	A	B	B	A	A	A	A	A	B	B	A	B	B	A	A
Marker63702	A	A	A	B	X	A	A	A	A	B	B	A	A	A	A	A	A	A	A	A	A	B	A	B	B	B	B	B	B	A	B	A	A	B	A	B	B	A	A	A	A	A	B	B	A	B	B	A	A
Marker11341	A	A	A	B	H	A	A	A	A	B	B	A	A	A	A	A	A	A	A	A	A	B	A	B	B	B	B	B	B	A	B	A	A	B	A	B	B	A	A	A	A	A	B	B	A	B	B	A	A
Marker57483	A	A	A	B	B	A	A	A	A	B	B	A	A	A	A	A	A	A	A	A	A	B	A	B	B	B	B	B	X	A	B	A	A	B	A	B	B	A	A	A	A	A	B	B	A	B	B	A	A
Marker114103	A	A	A	B	B	A	A	A	A	B	B	A	A	A	A	A	A	A	A	A	A	B	A	B	B	B	B	B	X	A	B	A	A	B	A	B	B	A	A	A	A	A	B	B	A	B	B	A	A
Marker89426	A	A	A	B	B	A	A	A	A	B	B	A	A	A	A	A	A	A	X	A	A	B	A	B	X	B	B	B	X	A	B	A	A	B	A	B	B	A	A	A	A	A	B	B	A	B	B	A	A
Marker2109	A	A	A	B	B	A	A	A	A	B	B	A	A	A	A	A	A	A	B	A	A	B	A	X	X	B	B	B	A	A	B	A	A	B	A	B	B	B	A	A	A	A	B	B	A	B	B	X	A
Marker112750	A	A	A	B	B	A	A	A	A	B	B	A	A	A	X	A	A	A	X	A	A	B	A	B	X	B	B	B	A	A	B	A	A	B	A	B	B	B	A	A	A	A	B	B	A	B	B	X	A
Marker101051	A	A	A	B	B	A	B	A	A	B	B	A	A	A	A	A	A	A	B	A	A	B	A	B	B	B	B	B	X	A	B	A	A	B	A	B	B	B	A	A	A	B	B	B	A	B	B	B	A
Marker15652	A	A	A	A	B	A	A	A	A	B	B	A	A	A	X	A	A	A	B	A	A	B	A	A	X	B	B	B	A	A	B	A	A	B	A	B	B	X	A	A	A	B	B	B	A	B	B	X	A
Marker32354	A	A	A	A	B	A	B	A	A	B	B	A	A	A	B	A	A	A	B	A	A	B	A	A	B	B	B	B	B	A	B	A	A	B	A	B	B	B	A	A	A	B	B	B	A	B	B	B	A
Marker27316	A	A	A	A	B	A	B	A	A	B	B	A	A	A	B	A	A	A	B	A	A	X	A	A	X	B	B	B	X	A	B	A	A	B	A	B	B	B	A	B	A	B	B	B	A	B	B	B	A
Marker94003	A	A	A	A	B	A	B	A	A	B	B	A	A	A	B	A	A	A	B	A	A	A	A	A	X	B	B	B	A	A	B	A	A	B	A	B	B	B	A	B	A	B	B	B	A	B	B	B	A
Marker64153	A	A	A	A	B	A	B	A	A	B	B	A	A	A	B	A	A	A	B	A	A	X	A	X	B	B	B	B	X	A	B	A	A	B	A	B	B	B	A	B	A	B	B	B	A	B	B	B	A
Marker3345	A	A	A	A	B	A	B	A	A	B	B	A	A	A	B	A	A	A	B	A	A	A	A	A	B	B	B	B	B	A	B	A	A	B	A	B	B	B	A	B	A	B	B	B	A	B	B	B	A
Marker63900	A	A	A	A	B	A	B	A	A	B	B	A	A	A	B	A	A	A	B	A	A	A	A	A	B	B	B	B	B	A	B	A	A	B	A	B	B	B	A	B	A	B	B	B	A	B	B	B	A
Marker39416	A	A	A	A	B	A	B	A	A	B	B	A	A	A	B	A	A	A	B	A	A	A	A	A	B	B	B	B	X	A	B	A	A	B	A	B	B	B	A	B	A	B	B	B	A	B	B	B	A
Marker57186	A	A	A	A	B	A	B	A	A	B	B	A	A	A	B	A	A	A	B	A	A	A	A	A	B	B	B	B	X	A	B	A	A	B	A	B	B	B	A	B	A	B	B	B	A	B	B	B	A
Marker79968	A	A	A	A	B	A	B	A	A	B	B	A	A	A	B	A	A	A	B	A	A	A	A	A	B	B	B	B	B	A	B	A	A	B	A	B	B	B	A	B	A	B	B	B	A	B	B	B	A
Marker58647	A	A	A	A	B	A	B	A	A	B	B	A	A	A	B	A	A	A	B	A	A	A	A	A	B	B	B	B	B	A	B	A	A	B	A	B	B	B	A	B	A	B	B	B	A	B	B	B	A
Marker58120	A	A	A	A	B	A	B	A	A	B	B	A	A	A	B	A	A	A	B	A	A	A	A	A	B	B	B	B	B	A	B	A	A	B	A	B	B	B	A	B	A	B	B	B	A	B	B	B	A
Marker12903	A	A	A	A	B	A	B	A	A	B	B	A	A	A	B	A	A	A	B	A	A	A	A	A	B	B	B	B	X	A	B	A	A	B	A	B	B	B	A	B	A	B	B	B	A	B	B	B	A
Marker48475	A	A	A	A	B	A	B	A	A	B	B	A	A	A	B	A	A	A	B	A	A	A	A	A	B	B	B	B	B	A	B	A	A	B	A	B	B	B	A	B	A	B	B	B	A	B	B	B	A
Marker105544	A	A	A	A	B	A	B	A	A	B	B	A	A	A	B	A	A	A	B	A	A	A	A	A	B	B	B	B	B	A	B	A	A	B	A	B	B	B	A	B	A	B	B	B	A	B	B	B	A
Marker30349	A	A	A	A	B	A	B	A	A	B	B	A	A	A	B	A	A	A	B	A	A	A	A	A	B	B	B	B	X	A	B	A	A	B	A	B	B	B	A	B	A	B	B	B	A	B	B	B	A
Marker25902	A	A	A	A	B	A	B	A	A	B	B	A	A	A	B	A	A	A	B	A	A	A	A	A	B	B	B	B	X	A	B	A	A	B	A	B	B	B	A	B	A	B	B	B	A	B	B	B	A
Marker114363	A	A	A	A	B	A	B	A	A	B	B	A	A	A	B	A	A	A	B	A	A	A	A	A	B	B	B	B	A	A	B	A	A	B	A	B	B	B	A	B	A	B	B	B	A	B	B	B	A
Marker58439	A	A	A	A	B	A	B	A	A	B	B	A	A	A	B	A	A	A	B	A	A	A	A	A	B	B	B	B	A	A	B	A	A	B	A	B	B	B	A	B	A	B	B	B	A	B	B	B	A
Marker3223	A	A	A	A	B	A	B	A	A	B	B	A	A	A	B	A	A	A	B	A	A	A	A	A	B	B	B	B	A	A	B	A	A	X	A	B	B	B	A	B	A	B	B	B	A	B	B	B	A
Marker110179	A	A	A	A	B	A	B	A	A	B	B	A	A	A	B	A	A	A	B	A	A	A	A	A	B	B	B	B	A	A	B	A	A	A	A	B	B	B	A	B	A	B	B	B	A	B	B	B	A
Marker37008	A	A	A	A	B	A	B	A	A	B	B	A	A	A	B	A	A	A	B	A	A	A	A	A	B	B	B	B	A	A	B	A	A	A	A	B	B	B	A	B	A	B	B	B	A	B	B	B	A
Marker33584	A	A	A	A	B	A	B	A	A	B	B	A	A	A	B	A	A	A	B	A	A	A	A	A	B	B	B	X	A	A	B	A	A	A	A	B	B	B	A	B	A	B	B	B	A	B	B	B	A
Marker94609	A	A	A	A	B	A	B	A	A	B	B	A	A	A	B	A	A	A	B	A	A	A	A	A	B	B	B	A	A	A	B	A	A	A	A	B	B	B	A	B	A	B	B	B	A	B	B	B	A
Marker20388	A	A	A	A	B	A	B	A	A	B	B	A	A	A	B	A	A	A	B	A	A	A	A	A	B	B	B	X	A	A	B	A	A	A	A	B	B	B	A	B	A	B	B	B	A	B	B	B	A
Marker55930	A	A	A	A	B	A	B	A	A	B	B	A	A	A	B	A	A	A	B	A	A	A	A	A	B	B	B	A	A	A	B	A	A	A	A	B	B	A	A	B	A	B	B	B	A	B	B	B	A
Marker71947	A	A	A	A	B	A	B	A	A	B	B	A	A	A	B	A	A	A	B	A	A	A	A	A	B	B	B	A	A	A	B	A	A	A	A	B	B	A	A	B	A	B	B	B	A	B	B	B	A
Marker50400	A	A	A	A	B	A	B	A	A	B	B	A	A	A	B	A	A	A	B	A	A	A	A	A	B	B	B	A	A	A	B	A	A	A	A	B	B	A	A	B	A	B	B	B	A	B	B	B	A
Marker6042	A	A	A	A	B	A	B	A	A	B	B	A	A	A	B	A	A	A	B	A	A	A	A	A	B	B	B	A	A	A	B	A	A	A	A	B	B	A	A	B	A	B	B	B	A	B	B	B	A
Marker39113	A	A	A	A	B	A	B	A	A	B	B	A	A	A	B	A	A	A	B	A	A	A	A	A	B	B	B	A	A	A	B	A	A	A	A	B	B	A	A	B	A	B	B	B	A	B	B	B	A
Marker11946	A	A	A	A	B	A	B	A	A	B	B	A	A	A	B	A	A	A	B	A	A	A	A	A	B	B	B	A	A	A	B	A	A	A	A	B	B	A	A	B	A	B	B	B	A	B	B	B	A
Marker103322	A	A	A	A	B	A	B	A	A	B	B	A	A	A	B	A	A	A	B	A	A	A	A	A	B	B	B	A	A	A	B	A	A	A	A	B	B	A	A	B	A	B	B	B	A	B	B	B	A
Marker77496	A	A	A	A	B	A	B	A	A	B	B	A	A	A	B	A	A	A	B	A	A	A	A	A	B	B	B	A	X	A	B	A	A	A	A	B	B	A	A	B	A	B	B	B	A	B	B	B	A
Marker80378	A	A	A	A	B	A	B	A	A	B	B	A	A	A	B	A	A	A	B	A	A	A	A	A	B	B	B	A	B	A	B	A	A	A	A	B	B	A	A	B	A	B	B	B	A	B	B	B	A
Marker102341	A	A	A	A	B	A	B	A	A	B	B	A	A	A	B	A	A	A	B	A	A	A	A	A	B	B	B	A	B	A	B	A	A	A	A	B	B	A	A	B	A	B	B	B	A	B	B	B	A
Marker21160	A	A	A	A	B	A	B	A	A	B	B	A	A	A	B	A	A	A	B	A	A	A	A	A	B	B	B	A	B	A	B	A	A	A	A	B	B	A	A	B	A	B	B	B	A	B	B	B	A
Marker81795	A	A	A	A	B	A	B	A	A	B	B	A	A	A	B	A	A	A	B	A	A	A	A	A	B	B	B	A	B	A	B	A	A	A	A	B	B	A	A	B	A	B	B	B	A	B	B	B	A
Marker28745	A	A	A	A	B	A	B	A	A	B	B	A	A	A	B	A	A	A	B	A	A	A	A	A	B	B	B	A	B	A	B	A	A	A	A	B	B	A	A	B	A	B	B	B	A	B	B	B	A
Marker62995	A	A	A	A	B	A	B	A	A	B	B	A	A	A	B	A	A	A	B	A	A	A	A	A	B	B	B	A	B	A	B	A	A	A	A	B	B	A	A	B	A	B	B	B	A	B	B	B	A
Marker48262	A	A	A	A	B	A	B	A	A	B	B	A	A	A	B	A	A	A	B	A	A	A	A	A	B	B	B	A	B	A	B	A	A	A	A	B	B	A	A	B	A	B	B	B	A	B	B	B	A
Marker78208	A	A	A	A	B	A	B	A	A	B	B	A	A	A	B	A	A	A	B	A	A	A	A	A	B	B	B	A	B	A	B	A	A	A	A	B	B	A	A	B	A	B	B	B	A	B	B	B	A
Marker69537	A	A	A	A	B	A	B	A	A	B	B	A	A	A	B	A	A	A	B	A	A	A	A	A	B	B	B	A	B	A	B	A	A	A	A	B	B	A	A	B	A	B	B	B	A	B	B	B	A
Marker2250	A	A	A	A	B	A	B	A	A	B	B	A	A	A	B	A	A	A	B	A	A	A	A	A	B	B	B	A	B	A	B	A	A	A	A	B	B	A	A	B	A	B	B	B	A	B	B	B	A
Marker11337	A	A	A	A	B	A	B	A	A	B	B	A	A	A	B	A	A	A	B	A	A	A	A	A	B	B	B	A	B	A	B	A	A	A	A	B	B	A	A	B	A	B	B	B	A	B	B	B	A
Marker107291	A	A	A	A	B	A	B	A	A	B	B	A	A	A	B	A	A	A	B	A	A	A	A	A	B	B	B	A	B	A	B	A	A	A	A	B	B	A	A	B	A	B	B	B	A	B	B	B	A
Marker77996	A	A	A	A	B	A	B	A	A	B	B	A	A	A	B	A	A	A	B	A	A	A	A	A	B	B	B	A	B	A	B	A	A	A	A	B	B	A	A	B	A	B	B	B	A	B	B	B	A
Marker15456	A	A	A	A	B	A	B	A	A	B	B	A	A	A	B	A	A	A	B	A	A	A	A	A	B	B	B	A	B	A	B	A	A	A	A	B	B	A	A	B	A	B	B	B	A	B	B	B	A
Marker102005	A	A	A	A	B	A	B	A	A	B	B	A	A	A	B	A	H	A	B	A	A	A	A	A	B	B	B	A	B	A	B	A	A	A	A	B	B	A	A	B	A	B	B	B	A	B	B	B	A
Marker34271	A	A	A	A	B	A	B	A	A	B	B	A	A	A	B	A	H	A	B	A	A	A	A	A	B	B	B	A	B	A	B	A	A	A	A	B	B	A	A	B	A	B	B	B	A	B	B	B	A
Marker48080	A	A	A	A	B	A	B	A	A	B	B	A	A	A	B	A	H	A	B	A	A	A	A	A	B	B	B	A	B	A	B	A	A	A	A	B	B	A	A	B	A	B	B	B	A	B	B	B	A
Marker86258	A	A	A	A	B	A	B	A	A	B	B	A	A	A	B	A	A	A	B	A	A	A	A	A	B	B	B	A	B	A	B	A	A	A	A	B	B	A	A	B	A	B	B	B	A	B	B	B	A
Marker46485	A	A	A	A	B	A	B	A	A	B	B	A	A	A	B	A	A	A	B	A	A	A	A	A	B	B	B	A	B	A	B	A	A	A	A	B	B	A	A	B	A	B	B	B	A	B	B	B	A
Marker64145	A	A	A	A	B	A	B	A	A	B	B	A	A	A	B	A	A	A	B	A	A	A	A	A	B	B	B	A	B	A	B	A	A	A	A	B	B	A	A	B	A	B	B	B	A	B	B	B	A
Marker106813	A	A	A	A	B	A	B	A	A	B	B	A	A	A	B	A	A	A	B	A	A	A	A	A	B	B	B	A	B	A	B	A	A	A	A	B	B	A	A	B	A	B	B	B	A	B	B	B	A
Marker77332	A	A	A	A	B	A	B	A	A	B	B	A	A	A	B	A	A	A	B	A	A	A	A	A	B	B	B	A	B	A	B	A	A	A	A	B	B	A	A	B	A	B	B	B	A	B	B	B	A
Marker1524	A	A	A	A	B	A	B	A	A	B	B	A	A	A	B	A	A	A	B	A	A	A	A	A	B	B	B	A	B	A	B	A	A	A	A	B	B	A	A	B	A	B	B	B	A	B	B	B	A
Marker52600	A	A	A	A	B	A	B	A	A	B	B	A	A	A	B	A	A	A	B	A	A	A	A	A	B	B	B	A	B	A	B	A	A	A	A	B	B	A	A	B	A	B	B	B	A	B	B	B	A
Marker40874	A	A	A	A	B	A	B	A	A	B	B	A	A	A	B	A	A	A	B	A	A	A	A	A	B	B	B	A	B	A	B	A	A	A	A	B	B	A	A	B	A	B	B	B	A	B	B	B	A
Marker33417	A	A	A	A	B	A	B	A	A	B	B	A	A	A	B	A	A	A	B	A	A	A	A	A	B	B	B	A	B	A	B	A	A	A	A	B	B	A	A	B	A	B	B	B	A	B	B	B	A
Marker84835	A	A	A	A	B	A	B	A	A	B	B	A	A	A	B	A	A	A	B	A	A	A	A	A	B	B	B	A	B	A	B	A	A	A	A	B	B	A	A	B	A	B	B	B	A	B	B	B	A
Marker49608	A	A	A	A	B	A	B	A	A	B	B	A	A	A	B	A	A	A	B	A	A	A	A	A	B	B	B	A	B	A	B	A	A	A	A	B	B	A	A	B	A	B	B	B	A	B	B	B	A
Marker48431	A	A	A	A	B	A	B	A	A	B	B	A	A	A	B	A	A	A	B	A	A	A	A	A	B	B	B	A	B	A	B	A	A	A	A	B	B	A	A	B	A	B	B	B	A	B	B	B	A
Marker67049	A	A	A	A	B	A	B	A	A	B	B	A	A	A	B	A	A	A	B	A	A	A	A	A	B	B	B	A	B	A	B	A	A	A	A	B	B	A	A	B	A	B	B	B	A	B	B	B	A
Marker51029	A	A	A	A	B	A	B	A	A	B	B	A	A	A	B	A	A	A	B	A	A	A	A	A	B	B	B	A	B	A	B	A	A	A	A	B	B	A	A	B	A	B	B	B	A	B	B	B	A
Marker36297	A	A	A	A	B	A	B	A	A	B	B	A	A	A	B	A	A	A	B	A	A	A	A	A	B	B	B	A	B	A	B	A	A	A	A	B	B	A	A	B	A	B	B	B	A	B	B	B	A
Marker116622	A	A	A	A	B	A	B	A	A	B	B	A	A	A	B	A	A	A	B	A	A	A	A	A	B	B	B	A	B	A	B	A	A	A	A	B	B	A	A	B	A	B	B	B	A	B	B	B	A
Marker38439	A	A	A	A	B	A	B	A	A	B	B	A	A	A	B	A	A	A	B	A	A	A	A	A	B	B	B	A	B	A	B	A	A	A	A	B	B	A	A	B	A	B	B	B	A	B	B	B	A
Marker23260	A	A	A	A	B	A	B	A	A	B	B	A	A	A	B	A	A	A	B	A	A	A	A	A	B	B	B	A	B	A	B	A	A	A	A	B	B	A	A	B	A	B	B	B	A	B	B	B	A
Marker104439	A	A	A	A	B	A	B	A	A	B	B	A	A	A	B	A	A	A	B	A	A	A	A	A	B	B	B	A	B	A	B	A	A	A	A	B	B	A	A	B	A	B	B	B	A	B	B	B	A
Marker48158	A	A	A	A	B	A	B	A	A	B	B	A	A	A	B	A	A	A	B	A	A	A	A	A	B	B	B	A	B	A	B	A	A	A	A	B	B	A	A	B	A	B	B	B	A	B	B	B	A
Marker23360	A	A	A	A	B	A	B	A	A	B	B	A	A	A	B	A	A	A	B	A	A	A	A	A	B	B	B	A	B	A	B	A	A	A	A	B	B	A	A	B	A	B	B	B	A	B	B	B	A
Marker95247	A	A	A	A	B	A	B	A	A	B	B	A	A	A	B	A	A	A	B	A	A	A	A	A	B	B	B	A	B	A	B	A	A	A	A	B	B	A	A	B	A	B	B	B	A	B	B	B	A
Marker29508	A	A	A	A	B	A	B	A	A	B	B	A	A	A	B	A	A	A	B	A	A	A	A	A	B	B	B	A	B	A	B	A	A	A	A	B	B	A	A	B	A	B	B	B	A	B	B	B	A
Marker79563	A	A	A	A	B	A	B	A	A	B	B	A	A	A	B	A	A	A	B	A	A	A	A	A	B	B	B	A	B	A	B	A	A	A	A	B	B	A	A	B	A	B	B	B	A	B	B	B	A
Marker88601	A	A	A	A	B	A	B	A	A	B	B	A	A	A	B	A	A	A	B	A	A	A	A	A	B	B	B	A	B	A	B	A	A	A	A	B	B	A	A	B	A	B	B	B	A	B	B	B	A
Marker25342	A	A	A	A	B	A	B	A	A	B	B	A	A	A	B	A	A	A	B	A	A	A	A	A	B	B	B	A	B	A	B	A	A	A	A	B	B	A	A	B	A	B	B	B	A	B	B	B	A
Marker110585	A	A	A	A	B	A	B	A	A	B	B	A	A	A	B	A	A	A	B	A	A	A	A	A	B	B	B	A	B	A	B	A	A	A	A	B	B	A	A	B	A	B	B	B	A	B	B	B	A
Marker11723	A	A	A	A	B	A	B	A	A	B	B	A	A	A	B	A	A	A	B	A	A	A	A	A	B	B	B	A	B	A	B	A	A	A	A	B	B	A	A	B	A	B	B	B	A	B	B	B	A
Marker117652	A	A	A	A	B	A	B	A	A	B	B	A	A	A	B	A	A	A	B	A	A	A	A	A	B	B	B	A	B	A	B	A	A	A	A	B	B	A	A	B	A	B	B	B	A	B	B	B	A
Marker92808	A	A	A	A	B	A	B	A	A	B	B	A	A	A	B	A	A	A	B	A	A	A	A	A	B	B	B	A	B	A	B	A	A	A	A	B	B	A	A	B	A	B	B	B	A	B	B	B	A
Marker58162	A	A	A	A	B	A	B	A	A	B	B	A	A	A	B	A	A	A	B	A	A	A	A	A	B	B	B	A	B	A	B	A	A	A	A	B	B	A	A	B	A	B	B	B	A	B	B	B	A
Marker70775	A	A	A	A	B	A	B	A	A	B	B	A	A	A	B	A	A	A	B	A	A	A	A	A	B	B	B	A	B	A	B	A	A	A	A	B	B	A	A	B	A	B	B	B	A	B	B	B	A
Marker50191	A	A	A	A	B	A	B	A	A	B	B	A	A	A	B	A	A	A	B	A	A	A	A	A	B	B	B	A	B	A	B	A	A	A	A	B	B	A	A	B	A	B	B	B	A	B	B	B	A
Marker55315	A	A	A	A	B	A	B	A	A	B	B	A	A	A	B	A	A	A	B	A	A	A	A	A	B	B	B	A	B	A	B	A	A	A	A	B	B	A	A	B	A	B	B	B	A	B	B	B	A
Marker116498	A	A	A	A	B	A	B	A	A	B	B	A	A	A	B	A	A	A	B	A	A	A	A	A	B	B	B	A	B	A	B	A	A	A	A	B	B	A	A	B	A	B	B	B	A	B	B	B	A
Marker35377	A	A	A	A	B	A	B	A	A	B	B	A	A	A	B	A	X	A	B	A	A	A	A	A	B	B	B	A	B	A	B	A	A	A	A	B	B	A	A	B	A	B	B	B	A	B	B	B	A
Marker88030	A	A	A	A	B	A	B	A	A	B	B	A	A	A	B	A	H	A	B	A	A	A	A	A	B	B	B	A	B	A	B	A	A	A	A	B	B	A	A	B	A	B	B	B	A	B	B	B	A
Marker74841	A	A	A	A	B	A	B	A	A	B	B	A	A	A	B	A	H	A	B	A	A	A	A	A	B	B	B	A	B	A	B	A	A	A	A	B	B	A	A	B	A	B	B	B	A	B	B	B	A
Marker91627	A	A	A	A	B	A	B	A	A	B	B	A	A	A	B	A	H	A	B	A	A	A	A	A	B	B	B	A	B	A	B	A	A	A	A	B	B	A	A	B	A	B	B	B	A	B	B	B	A
Marker71631	A	A	A	A	B	A	B	A	A	B	B	A	A	A	B	A	H	A	B	A	A	A	A	A	B	B	B	A	B	A	B	A	A	A	A	B	B	A	A	B	A	B	B	B	A	B	B	B	A
Marker107183	A	A	A	A	B	A	B	A	A	B	B	A	A	A	B	A	H	A	B	A	A	A	A	A	B	B	B	A	B	A	B	A	A	A	A	B	B	A	A	B	A	B	B	B	A	B	B	B	A
Marker99627	A	A	A	A	B	A	B	A	A	B	B	A	A	A	B	A	H	A	B	A	A	A	A	A	B	B	B	A	B	A	B	A	A	A	A	B	B	A	A	B	A	B	B	B	A	B	B	B	A
Marker108455	A	A	A	A	B	A	B	A	A	B	B	A	A	A	B	A	A	A	B	A	A	A	A	A	B	B	B	A	B	A	B	A	A	A	A	B	B	A	A	B	A	B	B	B	A	B	B	B	A
Marker58062	A	A	A	A	B	A	B	A	A	B	B	A	A	A	B	A	A	A	B	A	A	A	A	A	B	B	B	A	B	A	B	A	A	A	A	B	B	A	A	B	A	B	B	B	A	B	B	B	A
Marker93375	A	A	A	A	B	A	B	A	A	B	B	A	A	A	B	A	A	A	B	A	A	A	A	A	B	B	B	A	B	A	B	A	A	A	A	B	B	A	A	B	A	B	B	B	A	B	B	B	A
Marker71806	A	A	A	A	B	A	B	A	A	B	B	A	A	A	B	A	A	A	B	A	A	A	A	A	B	B	B	A	B	A	B	A	A	A	A	B	B	A	A	B	A	B	B	B	A	B	B	B	A
Marker114731	A	A	A	A	B	A	B	A	A	B	B	A	A	A	B	A	A	A	B	A	A	A	A	A	B	B	B	A	B	A	B	A	A	A	A	B	B	A	A	B	A	B	B	B	A	B	B	B	A
Marker101302	A	A	A	A	B	A	B	A	A	B	B	A	A	A	B	A	A	A	B	A	A	A	A	A	B	B	B	A	B	A	B	A	A	A	A	B	B	A	A	B	A	B	B	B	A	B	B	B	A
Marker89764	A	A	A	A	B	A	B	A	A	B	B	A	A	A	B	A	A	A	B	A	A	A	A	A	B	B	B	A	B	A	B	A	A	A	A	B	B	A	A	B	A	B	B	B	A	B	B	B	A
Marker19391	A	A	A	A	B	A	B	A	A	B	B	A	A	A	B	A	A	A	B	A	A	A	A	A	B	B	B	A	B	A	B	A	A	A	A	B	B	A	A	B	A	B	B	B	A	B	B	B	A
Marker114354	A	A	A	A	B	A	B	A	A	B	B	A	A	A	B	A	A	A	B	A	A	A	A	A	B	B	B	A	B	A	B	A	A	A	A	B	B	A	A	B	A	B	B	B	A	B	B	B	A
Marker80692	A	A	A	A	B	A	B	A	A	B	B	A	A	A	B	A	A	A	B	A	A	A	A	A	B	B	B	A	B	A	B	A	A	A	A	B	B	A	A	B	A	B	B	B	A	B	B	B	A
Marker80228	A	A	A	A	B	A	B	A	A	B	B	A	A	A	B	A	A	A	B	A	A	A	A	A	B	B	B	A	B	A	B	A	A	A	A	B	B	A	A	B	A	B	B	B	A	B	B	B	A
Marker31792	A	A	A	A	B	A	B	A	A	B	B	A	A	A	B	A	A	A	B	A	A	A	A	A	B	B	B	A	B	A	B	A	A	A	A	B	B	A	A	B	A	B	B	B	A	B	B	B	A
Marker62606	A	A	A	A	B	A	B	A	A	B	B	A	A	A	B	A	A	A	B	A	A	A	A	A	B	B	B	A	B	A	B	A	A	A	A	B	B	A	A	B	A	B	B	B	A	B	B	B	A
Marker13292	A	A	A	A	B	A	B	A	A	B	B	A	A	A	B	A	A	A	B	A	A	A	A	A	B	B	B	A	B	A	B	A	A	A	A	B	B	A	A	B	A	B	B	B	A	B	B	B	A
Marker19734	A	A	A	A	B	A	B	A	A	B	B	A	A	A	B	A	A	A	B	A	A	A	A	A	B	B	B	A	B	A	B	A	A	A	A	B	B	A	A	B	A	B	B	B	A	B	B	B	A
Marker69780	A	A	A	A	B	A	B	A	A	B	B	A	A	A	B	A	A	A	B	A	A	A	A	A	B	B	B	A	B	A	B	A	A	A	A	B	B	A	A	B	A	B	B	B	A	B	B	B	A
Marker109881	A	A	A	A	B	A	B	A	A	B	B	A	A	A	B	A	A	A	B	A	A	A	A	A	B	B	B	A	B	A	B	A	A	A	A	B	B	A	A	B	A	B	B	B	A	B	B	B	A
Marker71251	A	A	A	A	B	A	B	A	A	B	B	A	A	A	B	A	A	A	B	A	A	A	A	A	B	B	B	A	B	A	B	A	A	A	A	B	B	A	A	B	A	B	B	B	A	B	B	B	A
Marker85722	A	A	A	A	B	A	B	A	A	B	B	A	A	A	B	A	H	A	B	A	A	A	A	A	B	B	B	A	B	A	B	A	A	A	A	B	B	A	A	B	A	B	B	B	A	B	B	B	A
Marker5308	A	A	A	A	B	A	B	A	A	B	B	A	A	A	B	A	H	A	B	A	A	A	A	A	B	B	B	A	B	A	B	A	A	A	A	B	B	A	A	B	A	B	B	B	A	B	B	B	A
Marker94727	A	A	A	A	B	A	B	A	A	B	B	A	A	A	B	A	H	A	B	A	A	A	A	A	B	B	B	A	B	A	B	A	A	A	A	B	B	A	A	B	A	B	B	B	A	B	B	B	A
Marker38242	A	A	A	A	B	A	B	A	A	B	B	A	A	A	B	A	X	A	B	A	A	A	A	A	B	B	B	A	B	A	B	A	A	A	A	B	B	A	A	B	A	B	B	B	A	B	B	B	A
Marker105403	A	A	A	A	B	A	B	A	A	B	B	A	A	A	B	A	A	A	B	A	A	A	A	A	B	B	B	A	B	A	B	A	A	A	A	B	B	A	A	B	A	B	B	B	A	B	B	B	A
Marker108692	A	A	A	A	B	A	B	A	A	B	B	A	A	A	B	A	A	A	B	A	A	A	A	A	B	B	B	A	B	A	B	A	A	A	A	B	B	A	A	B	A	B	B	B	A	B	B	B	A
Marker68981	A	A	A	A	B	A	B	A	A	B	B	A	A	A	B	A	A	A	B	A	A	A	A	A	B	B	B	A	B	A	B	A	A	A	A	B	B	A	A	B	A	B	B	B	A	B	B	B	A
Marker55067	A	A	A	A	B	A	B	A	A	B	B	A	A	A	B	A	A	A	B	A	A	A	A	A	B	B	B	A	B	A	B	A	A	A	A	B	B	A	A	B	A	B	B	B	A	B	B	B	A
Marker12462	A	A	A	A	B	A	B	A	A	B	B	A	A	A	B	A	A	A	B	A	A	A	A	A	B	B	B	A	B	A	B	A	A	A	A	B	B	A	A	B	A	B	B	B	A	B	B	B	A
Marker30376	A	A	A	A	B	A	B	A	A	B	B	A	A	A	B	A	A	A	B	A	A	A	A	A	B	B	B	A	B	A	B	A	A	A	A	B	B	A	A	B	A	B	B	B	A	B	B	B	A
Marker56577	A	A	A	A	B	A	B	A	A	B	B	A	A	A	B	A	A	A	B	A	A	A	A	A	B	B	B	A	B	A	B	A	A	A	A	B	B	A	A	B	A	B	B	B	A	B	B	B	A
Marker41543	A	A	A	A	B	A	B	A	A	B	B	A	A	A	B	A	A	A	B	A	A	A	A	A	B	B	B	A	B	A	B	A	A	A	A	B	B	A	A	B	A	B	B	B	A	B	B	B	A
Marker59541	A	A	A	A	B	A	B	A	A	B	B	A	A	A	B	A	A	A	B	A	A	A	A	A	B	B	B	A	B	A	B	A	A	A	A	B	B	A	A	B	A	B	B	B	A	B	B	B	A
Marker42143	A	A	A	A	B	A	B	A	A	B	B	A	A	A	B	A	A	A	B	A	A	A	A	A	B	B	B	A	B	A	B	A	A	A	A	B	B	A	A	B	A	B	B	B	A	B	B	B	A
Marker55899	A	A	A	A	B	A	B	A	A	B	B	A	A	A	B	A	A	A	B	A	A	A	A	A	B	B	B	A	B	A	B	A	A	A	A	B	B	A	A	B	A	B	B	B	A	B	B	B	A
Marker38640	A	A	A	A	B	A	B	A	A	B	B	A	A	A	B	A	A	A	B	A	A	A	A	A	B	B	B	A	B	A	B	A	A	A	A	B	B	A	A	B	A	B	B	B	A	B	B	B	A
Marker37615	A	A	A	A	B	A	B	A	A	B	B	A	A	A	B	A	A	A	B	A	A	A	A	A	B	B	B	A	B	A	B	A	A	A	A	B	B	A	A	B	A	B	B	B	A	B	B	B	A
Marker103754	A	A	A	A	B	A	B	A	A	B	B	A	A	A	B	A	A	A	B	A	A	A	A	A	B	B	B	A	B	A	B	A	A	A	A	B	B	A	A	B	A	B	B	B	A	B	B	B	A
Marker55988	A	A	A	A	B	A	B	A	A	B	B	A	A	A	B	A	A	A	B	A	A	A	A	A	B	B	B	A	B	A	B	A	A	A	A	B	B	A	A	B	A	B	B	B	A	B	B	B	A
Marker94357	A	A	A	A	B	A	B	A	A	B	B	A	A	A	B	A	A	A	B	A	A	A	A	A	B	B	B	A	B	A	B	A	A	A	A	B	B	A	A	B	A	B	B	B	A	B	B	B	A
Marker98022	A	A	A	A	B	A	B	A	A	B	B	A	A	A	B	A	A	A	B	A	A	A	A	A	B	B	B	A	B	A	B	A	A	A	A	B	B	A	A	B	A	B	B	B	A	B	B	B	A
Marker45000	A	A	A	A	B	A	B	A	A	B	B	A	A	A	B	A	A	A	B	A	A	A	A	A	B	B	B	A	B	A	B	A	A	A	A	B	B	A	A	B	A	B	B	B	A	B	B	B	A
Marker11263	A	A	A	A	B	A	B	A	A	B	B	A	A	A	B	A	A	A	B	A	A	A	A	A	B	B	B	A	B	A	B	A	A	A	A	B	B	A	A	B	A	B	B	B	A	B	B	B	A
Marker64264	A	A	A	A	B	A	B	A	A	B	B	A	A	A	B	A	A	A	B	A	A	A	A	A	B	B	B	A	B	A	B	A	A	A	A	B	B	A	A	B	A	B	B	B	A	B	B	B	A
Marker105395	A	A	A	A	B	A	B	A	A	B	B	A	A	A	B	A	A	A	B	A	A	A	A	A	B	B	B	A	B	A	B	A	A	A	A	B	B	A	A	B	A	B	B	B	A	B	B	B	A
Marker93494	A	A	A	A	B	A	B	A	A	B	B	A	A	A	B	A	A	A	B	A	A	A	A	A	B	B	B	A	B	A	B	A	A	A	A	B	B	A	A	B	A	B	B	B	A	B	B	B	A
Marker10912	A	A	A	A	B	A	B	A	A	B	B	A	A	A	B	A	A	A	B	A	A	A	A	A	B	B	B	A	B	A	B	A	A	A	A	B	B	A	A	B	A	B	B	B	A	B	B	B	A
Marker23109	A	A	A	A	B	A	B	A	A	B	B	A	A	A	B	A	A	A	B	A	A	A	A	A	B	B	B	A	B	A	B	A	A	A	A	B	B	A	A	B	A	B	B	B	A	B	B	B	A
Marker90699	A	A	A	A	B	A	B	A	A	B	B	A	A	A	B	A	A	A	B	A	A	A	A	A	B	B	B	A	B	A	B	A	A	A	A	B	B	A	A	B	A	B	B	B	A	B	B	B	A
Marker99135	A	A	A	A	B	A	B	A	A	B	B	A	A	A	B	A	A	A	B	A	A	A	A	A	B	B	B	A	B	A	B	A	A	A	A	B	B	A	A	B	A	B	B	B	A	B	B	B	A
Marker98250	A	A	A	A	B	A	B	A	A	B	B	A	A	A	B	A	A	A	B	A	A	A	A	A	B	B	B	A	B	A	B	A	A	A	A	B	B	A	A	B	A	B	B	B	A	B	B	B	A
Marker91988	A	A	A	A	B	A	B	A	A	B	B	A	A	A	B	A	A	A	B	A	A	A	A	A	B	B	B	A	B	A	B	A	A	A	A	B	B	A	A	B	A	B	B	B	A	B	B	B	A
Marker92590	A	A	A	A	B	A	B	A	A	B	B	A	A	A	B	A	A	A	B	A	A	A	A	A	B	B	B	A	B	A	B	A	A	A	A	B	B	A	A	B	A	B	B	B	A	B	B	B	A
Marker5491	A	A	A	A	B	A	B	A	A	B	B	A	A	A	B	A	A	A	B	A	A	A	A	A	B	B	B	A	B	A	B	A	A	A	A	B	B	A	A	B	A	B	B	B	A	B	B	B	A
Marker9601	A	A	A	A	B	A	B	A	A	B	B	A	A	A	B	A	A	A	B	A	A	A	A	A	B	B	B	A	B	A	B	A	A	A	A	B	B	A	A	B	A	B	B	B	A	B	B	B	A
Marker16331	A	A	A	A	B	A	B	A	A	B	B	A	A	A	B	A	A	A	B	A	A	A	A	A	B	B	B	A	B	A	B	A	A	A	A	B	B	A	A	B	A	B	B	B	A	B	B	B	A
Marker110820	A	A	A	A	B	A	B	A	A	B	B	A	A	A	B	A	X	A	B	A	A	A	A	A	B	B	B	A	B	A	B	A	A	A	A	B	B	A	A	B	A	B	B	B	A	B	B	B	A
Marker49635	A	A	A	A	B	A	B	A	A	B	B	A	A	A	B	A	B	A	B	A	A	A	A	A	B	B	B	A	B	A	B	A	A	A	A	B	B	A	A	B	A	B	B	B	A	B	B	B	A
Marker114252	A	A	A	A	B	A	B	A	A	B	B	A	A	A	B	A	B	A	B	A	A	A	A	A	B	B	B	A	B	A	B	A	A	A	A	B	B	A	A	B	A	B	B	B	A	B	B	B	A
Marker50138	A	A	A	A	B	A	B	A	A	B	B	A	A	A	B	A	B	A	B	A	A	A	A	A	B	B	B	A	B	A	B	A	A	A	A	B	B	A	A	B	A	B	B	B	A	B	B	B	A
Marker67814	A	A	A	A	B	A	B	A	A	B	B	A	A	A	B	A	B	A	B	A	A	A	A	A	B	B	B	A	B	A	B	A	A	A	A	B	B	A	A	B	A	B	B	B	A	B	B	B	A
Marker99650	A	A	A	A	B	A	B	A	A	B	B	A	A	A	B	A	A	A	B	A	A	A	A	A	B	B	B	A	B	A	B	A	A	A	A	B	B	A	A	B	A	B	B	B	A	B	B	B	A
Marker109982	A	A	A	A	B	A	B	A	A	B	B	A	A	A	B	A	A	A	B	A	A	A	A	A	B	B	B	A	B	A	B	A	A	A	A	B	B	A	A	B	A	B	B	B	A	B	B	B	A
Marker98003	A	A	A	A	B	A	B	A	A	B	B	A	A	A	B	A	A	A	B	A	A	A	A	A	B	B	B	A	B	A	B	A	A	A	A	B	B	A	A	B	A	B	B	B	A	B	B	B	A
Marker108585	A	A	A	A	B	A	B	A	A	B	B	A	A	A	B	A	A	A	B	A	A	A	A	A	B	B	B	A	B	A	B	A	A	A	A	B	B	A	A	B	A	B	B	B	A	B	B	B	A
Marker101561	A	A	A	A	B	A	B	A	A	B	B	A	A	A	B	A	A	A	B	A	A	A	A	A	B	B	B	A	B	A	B	A	A	A	A	B	B	A	A	B	A	B	B	B	A	B	B	B	A
Marker118098	A	A	A	A	B	A	B	A	A	B	B	A	A	A	B	A	A	A	B	A	A	A	A	A	B	B	B	A	B	A	B	A	A	A	A	B	B	A	A	B	A	B	B	B	A	B	B	B	A
Marker97474	A	A	A	A	B	A	B	A	A	B	B	A	A	A	B	A	A	A	B	A	A	A	A	A	B	B	B	A	B	A	B	A	A	A	A	B	B	A	A	B	A	B	B	B	A	B	B	B	A
Marker78907	A	A	A	A	B	A	B	A	A	B	B	A	A	A	B	A	A	A	B	A	A	A	A	A	B	B	B	A	B	A	B	A	A	A	A	B	B	A	A	B	A	B	B	B	A	B	B	B	A
Marker110763	A	A	A	A	B	A	B	A	A	B	B	A	A	A	B	A	A	A	B	A	A	A	A	A	B	B	B	A	B	A	B	A	A	A	A	B	B	A	A	B	A	B	B	B	A	B	B	B	A
Marker13314	A	A	A	A	B	A	B	A	A	B	B	A	A	A	B	A	A	A	B	A	A	A	A	A	B	B	B	A	B	A	B	A	A	A	A	B	B	A	A	B	A	B	B	B	A	B	B	B	A
Marker81623	A	A	A	A	B	A	B	A	A	B	B	A	A	A	B	A	A	A	B	A	A	A	A	A	B	B	B	A	B	A	B	A	A	A	A	B	B	A	A	B	A	B	B	B	A	B	B	B	A
Marker92633	A	A	A	A	B	A	B	A	A	B	B	A	A	A	B	A	A	A	B	A	A	A	A	A	B	B	B	A	B	A	B	A	A	A	A	B	B	A	A	B	A	B	B	B	A	B	B	B	A
Marker17336	A	A	A	A	B	A	B	A	A	B	B	A	A	A	B	A	A	A	B	A	A	A	A	A	B	B	B	A	B	A	B	A	A	A	A	B	B	A	A	B	A	B	B	B	A	B	B	B	A
Marker42515	A	A	A	A	B	A	B	A	A	B	B	A	A	A	B	A	A	A	B	A	A	A	A	A	B	B	B	A	B	A	B	A	A	A	A	B	B	A	A	B	A	B	B	B	A	B	B	B	A
Marker32527	A	A	A	A	B	A	B	A	A	B	B	A	A	A	B	A	A	A	B	A	A	A	A	A	B	B	B	A	B	A	B	A	A	A	A	B	B	A	A	B	A	B	B	B	A	B	B	B	A
Marker107467	A	A	A	A	B	A	B	A	A	B	B	A	A	A	B	A	A	A	B	A	A	A	A	A	B	B	B	A	B	A	B	A	A	A	A	B	B	A	A	B	A	B	B	B	A	B	B	B	A
Marker65642	A	A	A	A	B	A	B	A	A	B	B	A	A	A	B	A	A	A	B	A	A	A	A	A	B	B	B	A	B	A	B	A	A	A	A	B	B	A	A	B	A	B	B	B	A	B	B	B	A
Marker111	A	A	A	A	B	A	B	A	A	B	B	A	A	A	B	A	A	A	B	A	A	A	A	A	B	B	B	A	B	A	B	A	A	A	A	B	B	A	A	B	A	B	B	B	A	B	B	B	A
Marker78171	A	A	A	A	B	A	B	A	A	B	B	A	A	A	B	A	A	A	B	A	A	A	A	A	B	B	B	A	B	A	B	A	A	A	A	B	B	A	A	B	A	B	B	B	A	B	B	B	A
Marker108622	A	A	A	A	B	A	B	A	A	B	B	A	A	A	B	A	A	A	B	A	A	A	A	A	B	B	B	A	B	A	B	A	A	A	A	B	B	A	A	B	A	B	B	B	A	B	B	B	A
Marker92550	A	A	A	A	B	A	B	A	A	B	B	A	A	A	B	A	A	A	B	A	A	A	A	A	B	B	B	A	B	A	B	A	A	A	A	B	B	A	A	B	A	B	B	B	A	B	B	B	A
Marker72613	A	A	A	A	B	A	B	A	A	B	B	A	A	A	B	A	A	A	B	A	A	A	A	A	B	B	B	A	B	A	B	A	A	A	A	B	B	A	A	B	A	B	B	B	A	B	B	B	A
Marker43198	A	A	A	A	B	A	B	A	A	B	B	A	A	A	B	A	A	A	B	A	A	A	A	A	B	B	B	A	B	A	B	A	A	A	A	B	B	A	A	B	A	B	B	B	A	B	B	B	A
Marker97914	A	A	A	A	B	A	B	A	A	B	B	A	A	A	B	A	A	A	B	A	A	A	A	A	B	B	B	A	B	A	B	A	A	A	A	B	B	A	A	B	A	B	B	B	A	B	B	B	A
Marker107047	A	A	A	A	B	A	B	A	A	B	B	A	A	A	B	A	A	A	B	A	A	A	A	A	B	B	B	A	B	A	B	A	A	A	A	B	B	A	A	B	A	B	B	B	A	B	B	B	A
Marker30090	A	A	A	A	B	A	B	A	A	B	B	A	A	A	B	A	A	A	B	A	A	A	A	A	B	B	B	A	B	A	B	A	A	A	A	B	B	A	A	B	A	B	B	B	A	B	B	B	A
Marker17161	A	A	A	A	B	A	B	A	A	B	B	A	A	A	B	A	A	A	B	A	A	A	A	A	B	B	B	A	B	A	B	A	A	A	A	B	B	A	A	B	A	B	B	B	A	B	B	B	A
Marker36439	A	A	A	A	B	A	B	A	A	B	B	A	A	A	B	A	A	A	B	A	A	A	A	A	B	B	B	A	B	A	B	A	A	A	A	B	B	A	A	B	A	B	B	B	A	B	B	B	A
Marker8807	A	A	A	A	B	A	B	A	A	B	B	A	A	A	B	A	A	A	B	A	A	A	A	A	B	B	B	A	B	A	B	A	A	A	A	B	B	A	A	B	A	B	B	B	A	B	B	B	A
Marker30442	A	A	A	A	B	A	B	A	A	B	B	A	A	A	B	A	A	A	B	A	A	A	A	A	B	B	B	A	B	A	B	A	A	A	A	B	B	A	A	B	A	B	B	B	A	B	B	B	A
Marker63039	A	A	A	A	B	A	B	A	A	B	B	A	A	A	B	A	A	A	B	A	A	A	A	A	B	B	B	A	B	A	B	A	A	A	A	B	B	A	A	B	A	B	B	B	A	B	B	B	A
Marker45036	A	A	A	A	B	A	B	A	A	B	B	A	A	A	B	A	A	A	B	A	A	A	A	A	B	B	B	A	B	A	B	A	A	A	A	B	B	A	A	B	A	B	B	B	A	B	B	B	A
Marker44202	A	A	A	A	B	A	B	A	A	B	B	A	A	A	B	A	A	A	B	A	A	A	A	A	B	B	B	A	B	A	B	A	A	A	A	B	B	A	A	B	A	B	B	B	A	B	B	B	A
Marker18374	A	A	A	A	B	A	B	A	A	B	B	A	A	A	B	A	A	A	B	A	A	A	A	A	B	B	B	A	B	A	B	A	A	A	A	B	B	A	A	B	A	B	B	B	A	B	B	B	A
Marker8283	A	A	A	A	B	A	B	A	A	B	B	A	A	A	B	A	A	A	B	A	A	A	A	A	B	B	B	A	B	A	B	A	A	A	A	B	B	A	A	B	A	B	B	B	A	B	B	B	A
Marker40092	A	A	A	A	B	A	B	A	A	B	B	A	A	A	B	A	A	A	B	A	A	A	A	A	B	B	B	A	B	A	B	A	A	A	A	B	B	A	A	B	A	B	B	B	A	B	B	B	A
Marker12105	A	A	A	A	B	A	B	A	A	B	B	A	A	A	B	A	A	A	B	A	A	A	A	A	B	B	B	A	B	A	B	A	A	A	A	B	B	A	A	B	A	B	B	B	A	B	B	B	A
Marker3170	A	A	A	A	B	A	B	A	A	B	B	A	A	A	B	A	A	A	B	A	A	A	A	A	B	B	B	A	B	A	B	A	A	A	A	B	B	A	A	B	A	B	B	B	A	B	B	B	A
Marker88861	A	A	A	A	B	A	B	A	A	B	B	A	A	A	B	A	A	A	B	A	A	A	A	A	B	B	B	A	B	A	B	A	A	A	A	B	B	A	A	B	A	B	B	B	A	B	B	B	A
Marker71964	A	A	A	A	B	A	B	A	A	B	B	A	A	A	B	A	A	A	B	A	A	A	A	A	B	B	B	A	B	A	B	A	A	A	A	B	B	A	A	B	A	B	B	B	A	B	B	B	A
Marker22839	A	A	A	A	B	A	B	A	A	B	B	A	A	A	B	A	A	A	B	A	A	A	A	A	B	B	B	A	B	A	B	A	A	A	A	B	B	A	A	B	A	B	B	B	A	B	B	B	A
Marker28478	A	A	A	A	B	A	B	A	A	B	B	A	A	A	B	A	A	A	B	A	A	A	A	A	B	B	B	A	B	A	B	A	A	A	A	B	B	A	A	B	A	B	B	B	A	B	B	B	A
Marker22465	A	A	A	A	B	A	B	A	A	B	B	A	A	A	B	A	A	A	B	A	A	A	A	A	B	B	B	A	B	A	B	A	A	A	A	B	B	A	A	B	A	B	B	B	A	B	B	B	A
Marker40447	A	A	A	A	B	A	B	A	A	B	B	A	A	A	B	A	A	A	B	A	A	A	A	A	B	B	B	A	B	A	B	A	A	A	A	B	B	A	A	B	A	B	B	B	A	B	B	B	A
Marker96813	A	A	A	A	B	A	B	A	A	B	B	A	A	A	B	A	A	A	B	A	A	A	A	A	B	B	B	A	B	A	B	A	A	A	A	B	B	A	A	B	A	B	B	B	A	B	B	B	A
Marker41542	A	A	A	A	B	A	B	A	A	B	B	A	A	A	B	A	A	A	B	A	A	A	A	A	B	B	B	A	B	A	B	A	A	A	A	B	B	A	A	B	A	B	B	B	A	B	B	B	A
Marker72248	A	A	A	A	B	A	B	A	A	B	B	A	A	A	B	A	A	A	B	A	A	A	A	A	B	B	B	A	B	A	B	A	A	A	A	B	B	A	A	B	A	B	B	B	A	B	B	B	A
Marker47854	A	A	A	A	B	A	B	A	A	B	B	A	A	A	B	A	A	A	B	A	A	A	A	A	B	B	B	A	B	A	B	A	A	A	A	B	B	A	A	B	A	B	B	B	A	B	B	B	A
Marker87689	A	A	A	A	B	A	B	A	A	B	B	A	A	A	B	A	A	A	B	A	A	A	A	A	B	B	B	A	B	A	B	A	A	A	A	B	B	A	A	B	A	B	B	B	A	B	B	B	A
Marker113790	A	A	A	A	B	A	B	A	A	B	B	A	A	A	B	A	A	A	B	A	A	A	A	A	B	B	B	A	B	A	B	A	A	A	A	B	B	A	A	B	A	B	B	B	A	B	B	B	A
Marker85649	A	A	A	A	B	A	B	A	A	B	B	A	A	A	B	A	A	A	B	A	A	A	A	A	B	B	B	A	B	A	B	A	A	A	A	B	B	A	A	B	A	B	B	B	A	B	B	B	A
Marker41387	A	A	A	A	B	A	B	A	A	B	B	A	A	A	B	A	A	A	B	A	A	A	A	A	B	B	B	A	B	A	B	A	A	A	A	B	B	A	A	B	A	B	B	B	A	B	B	B	A
Marker96519	A	A	A	A	B	A	B	A	A	B	B	A	A	A	B	A	A	A	B	A	A	A	A	A	B	B	B	A	B	A	B	A	A	A	A	B	B	A	A	B	A	B	B	B	A	B	B	B	A
Marker35152	A	A	A	A	B	A	B	A	A	B	B	A	A	A	B	A	A	A	B	A	A	A	A	A	B	B	B	A	B	A	B	A	A	A	A	B	B	A	A	B	A	B	B	B	A	B	B	B	A
Marker36541	A	A	A	A	B	A	B	A	A	B	B	A	A	A	B	A	A	A	B	A	A	A	A	A	B	B	B	A	B	A	B	A	A	A	A	B	B	A	A	B	A	B	B	B	A	B	B	B	A
Marker12440	A	A	A	A	B	A	B	A	A	B	B	A	A	A	B	A	A	A	B	A	A	A	A	A	B	B	B	A	X	A	B	A	A	A	A	B	B	A	A	B	A	B	B	B	A	B	B	B	A
Marker11003	A	A	A	A	B	A	B	A	A	B	B	A	A	A	B	A	A	A	B	A	A	A	A	A	B	B	B	A	A	A	B	A	A	A	A	B	B	A	A	B	A	B	B	B	A	B	B	B	A
Marker89957	A	A	A	A	B	A	B	A	A	B	B	A	A	A	B	A	A	A	B	A	A	A	A	A	B	B	B	A	A	A	B	A	A	A	A	B	B	A	A	B	A	B	B	B	A	B	B	B	A
Marker38392	A	A	A	A	B	A	B	A	A	B	B	A	A	A	B	A	A	A	B	A	A	A	A	A	B	B	B	A	A	A	B	A	A	A	A	B	B	A	A	B	A	B	B	B	A	B	B	B	A
Marker106452	A	A	A	A	B	A	B	A	A	B	B	A	A	A	B	A	A	A	B	A	A	A	A	A	B	B	B	A	A	A	B	A	X	A	A	B	B	A	A	B	A	B	B	B	A	B	B	B	A
Marker2829	A	A	A	A	B	A	B	A	A	B	B	A	A	A	B	A	A	A	B	A	A	A	A	A	B	B	B	A	A	A	B	A	X	A	A	B	B	A	A	B	A	B	B	B	A	B	B	B	A
Marker111292	A	A	A	A	B	A	B	A	A	B	B	A	A	A	B	A	A	A	B	A	A	A	A	A	B	B	B	A	A	A	B	A	A	A	A	B	B	A	A	B	A	B	B	B	A	B	B	B	A
Marker39087	A	A	A	A	B	A	B	A	A	B	B	A	A	A	B	A	A	A	B	A	A	A	A	A	B	B	B	A	A	A	B	A	X	A	A	B	B	A	A	B	A	B	B	B	A	B	B	B	A
Marker39766	A	A	A	A	B	A	B	A	A	B	B	A	A	A	B	A	A	A	B	A	A	A	A	A	B	B	B	A	A	A	B	A	X	A	A	B	B	A	A	B	A	B	B	B	A	B	B	B	A
Marker117291	A	A	A	A	B	A	B	A	A	B	B	A	A	A	B	A	A	A	B	A	A	A	A	A	B	B	B	A	A	A	B	A	A	A	A	B	B	A	A	B	A	B	B	B	A	B	B	B	A
Marker98683	A	A	A	A	B	A	B	A	A	B	B	A	A	A	B	A	A	A	B	A	A	A	A	A	B	B	B	A	A	A	B	A	A	A	A	B	B	A	A	B	A	B	B	B	A	B	B	B	A
Marker71740	A	A	A	A	B	A	B	A	A	B	B	A	A	A	B	A	A	A	B	A	A	A	A	A	B	B	B	A	A	A	B	A	A	A	A	B	B	A	A	B	A	B	B	B	A	B	B	B	A
Marker83504	A	A	A	A	B	A	B	A	A	B	B	A	A	A	B	A	A	A	B	A	A	A	A	A	B	B	B	A	A	A	B	A	X	A	A	B	B	A	A	B	A	B	B	B	A	B	B	B	A
Marker1650	A	A	A	A	B	A	B	A	A	B	B	A	A	A	B	A	A	A	B	A	A	A	A	A	B	B	B	A	A	A	B	A	A	A	A	B	B	A	A	B	A	B	B	B	A	B	B	B	A
Marker81374	A	A	A	A	B	A	B	A	A	B	B	A	A	A	B	A	A	A	B	A	A	A	A	A	B	B	B	A	A	A	B	A	A	A	A	B	B	A	A	B	A	B	B	B	A	B	B	B	A
Marker26363	A	A	A	A	B	A	B	A	A	B	B	A	A	A	B	A	A	A	B	A	A	A	A	A	B	B	B	A	A	A	B	A	A	A	A	B	B	A	A	B	A	B	B	B	A	B	B	B	A
Marker5816	A	A	A	A	B	A	B	A	A	B	B	A	A	A	B	A	A	A	B	A	A	A	A	A	B	B	B	A	A	A	B	A	A	A	A	B	B	A	A	B	A	B	B	B	A	B	B	B	A
Marker102426	A	A	A	A	B	A	B	A	A	B	B	A	A	A	B	A	A	A	B	A	A	A	A	A	B	B	B	A	A	A	B	A	A	A	A	B	B	A	A	B	A	B	B	B	A	B	B	B	A
Marker38803	A	A	A	A	B	A	B	A	A	B	B	A	A	A	B	A	A	A	B	A	A	A	A	A	B	B	B	A	A	A	B	A	A	A	A	B	B	A	A	B	A	B	B	B	A	B	B	B	A
Marker25729	A	A	A	A	B	A	B	A	A	B	B	A	A	A	B	A	A	A	B	A	A	A	A	A	B	B	B	A	A	A	B	A	A	A	A	B	B	A	A	B	A	B	B	B	A	B	B	B	A
Marker65451	A	A	A	A	B	A	B	A	A	B	B	A	A	A	B	A	A	A	B	A	A	A	A	A	B	B	B	A	A	A	B	A	A	A	A	B	B	A	A	B	A	B	B	B	A	B	B	B	A
Marker40726	A	A	A	A	B	A	B	A	A	B	B	A	A	A	B	A	A	A	B	A	A	A	A	A	B	B	B	A	A	A	B	A	A	A	A	B	B	A	A	B	A	B	B	B	A	B	B	B	A
Marker80423	A	A	A	A	B	A	B	A	A	B	B	A	A	A	B	A	A	A	B	A	A	A	A	A	B	B	B	A	A	A	B	A	A	A	A	B	B	A	A	B	A	B	B	B	A	B	B	B	A
Marker7259	A	A	A	A	B	A	B	A	A	B	B	A	A	A	B	A	A	A	B	A	A	A	A	A	B	B	B	A	A	A	B	A	X	A	A	B	B	A	A	B	A	B	B	B	A	B	B	B	A
Marker40506	A	A	A	A	B	A	B	A	A	B	B	A	A	A	B	A	X	A	B	A	A	A	A	A	B	B	B	A	A	A	B	A	X	A	A	B	B	A	A	B	A	B	B	B	A	B	B	B	A
Marker67283	A	A	A	A	B	A	B	A	A	B	B	A	A	X	B	A	B	A	B	A	A	A	A	A	X	B	B	A	X	A	B	A	X	A	A	B	B	A	A	B	A	B	B	B	A	X	B	B	A
Marker20752	A	A	A	A	B	A	B	A	A	B	B	A	A	B	B	A	X	A	B	A	A	A	A	A	X	B	B	A	A	A	B	A	A	A	A	B	B	A	A	B	A	B	B	B	A	B	B	B	A
Marker31603	A	A	A	A	B	A	B	A	A	B	B	A	A	B	B	A	A	A	B	A	A	A	A	A	A	B	B	A	X	A	B	A	X	A	A	B	B	A	A	B	A	B	B	B	A	A	B	B	A
Marker57048	A	A	A	A	B	A	B	A	A	B	B	A	A	B	B	A	A	A	B	A	A	A	A	A	A	B	B	A	B	A	B	A	A	A	A	B	B	A	A	B	A	B	B	B	A	A	B	B	A
Marker68715	A	A	A	A	B	A	B	A	A	B	B	A	A	B	B	A	B	A	B	A	A	A	A	A	A	B	B	A	A	A	B	A	A	A	A	B	B	A	A	B	A	B	B	B	A	A	B	B	A
Marker94584	A	A	A	A	B	A	B	A	A	B	B	A	A	B	B	A	B	A	B	A	A	A	A	A	A	B	B	A	A	A	B	A	A	A	A	B	B	A	A	B	A	B	B	B	A	A	B	B	A
Marker102373	A	A	A	A	B	A	B	A	A	B	B	A	A	B	B	A	B	A	B	A	A	A	A	A	A	B	B	A	B	A	B	A	A	A	A	B	B	A	A	B	A	B	B	B	A	A	B	B	A
Marker88412	A	A	A	A	B	A	B	A	A	B	B	A	A	B	B	A	B	A	B	A	A	A	A	A	A	B	B	A	B	A	B	A	X	A	A	B	B	A	A	B	A	B	B	B	A	A	B	B	A
Marker67855	A	A	A	A	B	A	B	A	A	B	B	A	A	B	B	A	B	A	B	A	A	A	A	A	A	B	B	A	B	A	B	A	A	A	A	B	B	A	A	B	A	B	B	B	A	A	B	B	A
Marker30309	A	A	A	A	B	A	B	A	A	B	B	A	A	B	B	A	B	A	B	A	A	A	A	A	A	B	B	A	B	A	B	A	A	A	A	B	B	A	A	B	A	B	B	B	A	A	B	B	A
Marker47240	A	A	A	A	B	A	B	A	A	B	B	A	A	B	B	A	B	A	B	A	X	A	A	A	A	X	B	A	X	A	B	A	X	A	A	B	B	A	A	B	A	B	B	B	X	A	B	B	A
Marker5114	A	A	A	A	B	A	B	A	A	B	B	A	A	B	B	A	B	A	B	A	A	A	A	A	A	B	B	A	B	A	B	A	A	A	A	B	B	A	A	B	A	B	B	X	X	A	B	B	A
Marker45581	A	A	A	A	A	A	X	A	A	B	B	A	A	B	X	A	B	A	B	A	A	A	A	A	A	A	B	A	X	X	B	A	X	A	A	B	B	A	A	B	A	B	B	B	A	A	B	B	A
Marker114008	A	A	A	A	B	A	B	X	A	B	B	A	A	B	B	A	B	A	B	A	B	A	A	A	A	A	B	X	X	X	B	A	X	A	A	B	B	A	A	B	A	B	X	B	A	A	B	B	A
Marker86972	A	A	A	A	B	A	B	A	A	B	B	A	A	B	B	A	B	A	B	A	B	A	A	A	A	A	B	A	X	A	B	A	X	A	A	B	B	A	A	B	A	B	B	B	X	A	B	B	A
Marker80234	A	A	A	A	X	A	X	B	A	B	B	A	A	B	X	A	B	A	B	A	B	A	A	A	A	A	B	X	B	X	B	A	X	A	A	B	B	A	B	B	A	B	X	X	A	A	B	B	A
Marker79044	A	A	A	A	A	A	X	B	A	B	B	A	A	B	A	A	B	A	B	A	B	X	A	A	A	X	B	A	X	A	B	A	A	A	A	B	B	A	X	B	A	B	A	A	B	A	B	A	A
Marker90996	A	A	A	A	A	A	A	B	A	B	B	A	A	B	X	A	B	A	B	A	B	B	A	A	A	A	B	A	X	X	B	A	A	B	A	B	B	A	B	B	A	B	A	A	B	X	B	A	A
Marker34431	A	A	A	B	A	A	A	B	A	B	B	A	A	B	A	A	B	A	B	A	B	B	A	A	A	A	B	A	B	A	B	A	A	B	A	B	B	A	B	B	A	B	A	A	B	B	B	A	A
Marker115318	A	A	A	B	A	A	A	X	A	B	B	A	A	B	A	A	B	A	B	A	B	B	A	A	A	A	B	B	B	B	B	A	A	B	A	B	B	A	B	B	A	B	A	A	B	B	A	A	A
Marker104999	A	A	A	B	A	A	A	B	A	B	B	A	A	B	A	A	B	A	B	A	B	B	A	A	A	A	B	B	B	X	B	A	A	B	A	B	B	A	B	B	A	B	B	A	B	B	A	A	A
Marker74292	A	A	B	B	A	A	A	B	A	B	B	A	B	B	A	A	B	A	B	A	B	B	A	A	A	A	B	B	B	B	B	A	A	B	A	B	B	A	B	B	A	B	B	A	B	B	A	A	A
Marker38954	A	A	B	B	A	A	A	B	A	B	B	A	B	B	A	A	B	A	B	A	B	B	A	A	A	A	B	B	X	B	B	A	A	X	A	B	B	A	X	B	A	B	B	A	B	B	A	A	A
Marker104551	A	A	B	B	A	A	A	B	A	B	B	A	B	B	A	A	A	A	B	A	B	B	A	A	A	A	B	B	X	B	B	A	A	B	A	X	B	A	X	A	A	B	B	A	B	B	A	A	A
Marker46797	A	A	B	B	A	A	A	B	A	B	B	A	B	B	A	A	X	A	B	A	B	B	A	A	A	A	B	B	X	B	B	A	A	B	A	A	B	A	A	A	A	B	B	A	B	B	A	A	A
Marker70245	A	A	B	B	A	A	A	B	A	B	B	A	B	B	A	A	A	A	B	A	B	B	A	A	A	A	B	B	B	B	B	A	A	B	A	A	B	A	A	A	A	B	B	A	B	B	A	A	A
Marker102825	A	A	B	B	A	A	A	B	A	B	B	A	B	B	A	A	A	A	B	A	B	B	A	A	A	A	B	B	B	B	B	A	A	B	A	A	B	A	B	A	A	B	B	A	B	B	A	A	A
Marker77694	A	A	B	B	A	A	A	B	A	B	B	A	B	B	A	A	A	A	B	A	B	B	A	A	A	A	B	B	X	B	B	A	A	B	A	A	B	A	A	A	A	B	B	A	B	B	A	A	A
Marker53295	A	A	B	B	A	A	A	B	A	B	B	A	B	B	A	A	A	A	B	A	B	B	A	A	A	A	B	B	B	B	B	A	A	B	A	A	B	A	A	A	A	B	B	A	B	B	A	A	A
Marker48874	A	A	B	B	A	A	A	B	A	B	B	A	B	B	A	A	A	A	B	A	B	B	A	A	A	A	B	B	B	B	B	A	A	B	A	A	B	A	A	A	A	B	B	A	B	B	A	A	A
Marker15896	A	A	B	B	A	A	A	B	A	B	B	A	B	B	A	A	A	A	B	A	B	B	A	A	A	A	B	B	B	B	B	A	A	B	A	A	B	A	A	A	A	B	B	A	B	B	A	A	A
Marker75193	A	A	B	B	A	A	A	B	A	B	B	A	B	B	A	A	A	A	B	A	B	B	A	A	A	A	B	B	B	B	B	A	A	B	A	A	B	A	B	A	A	B	B	A	B	B	A	A	A
Marker2926	A	A	B	B	A	A	A	B	A	B	B	A	B	B	A	A	A	A	B	A	B	B	A	A	A	A	B	B	X	B	B	A	A	B	A	A	B	A	B	A	A	B	B	A	B	B	A	A	A
Marker2002956	B	B	B	A	A	B	B	A	A	B	A	B	B	A	B	A	A	A	B	A	B	B	B	B	B	B	B	B	A	A	A	A	X	B	A	A	A	B	B	A	A	B	B	A	A	A	H	A	A
Marker2071217	B	B	B	A	A	B	B	A	A	B	A	B	B	A	X	A	X	A	B	A	B	B	B	B	B	B	B	B	A	A	A	A	A	B	A	A	A	B	B	A	A	B	B	A	A	A	H	A	A
Marker2015855	X	B	B	A	A	B	B	A	A	B	A	B	B	A	X	A	X	A	B	A	B	B	B	B	X	B	B	B	B	A	A	A	X	B	A	A	A	B	B	A	A	B	B	A	A	A	A	A	A
Marker2000372	X	B	B	A	A	B	B	A	A	B	A	B	B	A	B	A	X	A	B	A	B	B	X	B	X	B	B	B	B	A	A	A	X	B	A	A	A	X	B	X	X	B	B	A	A	A	A	A	A
Marker1992149	B	B	B	A	A	B	B	A	A	B	A	B	B	A	B	A	A	A	B	A	B	B	B	B	B	B	B	B	B	A	A	A	A	B	A	A	A	B	B	A	A	B	B	A	A	A	A	A	A
Marker2034968	B	B	B	A	A	B	B	A	A	B	A	B	B	A	B	A	A	A	B	A	B	B	B	B	X	B	B	B	B	A	A	A	A	B	A	A	A	B	B	A	A	B	B	A	A	A	H	A	A
Marker2080734	B	B	B	A	A	B	B	A	A	B	A	B	B	A	B	X	X	A	B	A	B	B	X	B	B	B	B	B	X	A	A	A	X	B	A	A	A	X	B	A	A	B	B	A	A	A	B	A	A
Marker2032120	B	B	B	A	A	B	B	A	A	B	B	B	B	A	B	B	B	A	B	A	B	B	B	B	X	B	B	B	B	A	A	A	A	B	A	A	A	X	B	B	A	B	B	A	A	A	X	B	A
Marker2075292	B	B	B	A	A	B	B	A	A	B	X	B	B	A	B	B	B	A	B	A	B	B	X	B	B	B	B	B	A	A	A	A	A	B	A	A	A	A	B	B	A	B	B	A	A	A	B	B	A
Marker2010762	B	B	B	A	A	B	B	A	B	B	X	B	B	A	X	B	B	A	B	A	B	B	X	B	X	B	B	B	A	A	A	A	A	B	A	A	A	A	B	B	B	B	B	A	A	A	H	B	A
Marker2057405	B	B	B	A	A	B	B	A	B	B	X	B	B	A	B	B	B	A	B	A	B	B	B	B	X	B	B	B	A	A	A	A	X	B	A	A	A	A	B	B	B	B	B	A	A	A	X	B	A
Marker2032065	B	B	B	A	A	B	B	A	B	B	B	B	B	A	X	B	B	A	B	A	B	B	B	B	X	B	B	B	X	A	A	A	X	B	A	A	A	A	B	B	B	B	B	A	A	A	X	B	A
Marker2071346	B	B	B	A	A	B	B	A	B	B	B	B	B	A	X	B	B	A	B	A	B	B	B	B	B	B	B	B	B	A	A	A	X	B	A	A	A	A	B	B	B	B	B	A	A	A	B	B	A
Marker1998108	B	B	B	A	A	B	B	A	A	B	B	B	B	A	X	B	B	A	B	A	B	B	X	B	B	B	B	B	A	A	A	A	A	B	A	A	A	A	B	B	B	B	B	A	A	A	B	B	A
Marker2057481	B	B	B	A	A	B	B	A	X	B	B	B	B	A	X	B	B	A	B	A	B	B	B	B	B	B	B	B	X	A	A	A	A	B	A	A	A	A	B	B	B	B	B	A	A	A	H	B	A
Marker2016197	B	B	B	A	A	B	B	A	X	B	B	B	B	A	X	B	B	A	B	A	B	B	B	B	X	X	B	B	B	A	A	A	X	B	A	A	A	A	X	B	B	B	B	A	A	A	H	B	A
Marker2039548	B	B	B	A	A	B	B	A	B	B	B	B	B	A	X	B	B	A	B	A	B	B	B	B	B	A	B	B	X	A	A	A	A	B	A	A	A	A	B	B	B	B	B	A	A	A	H	B	X
Marker2015149	B	B	B	A	A	B	B	A	B	B	B	B	B	A	X	B	B	A	B	A	B	B	B	B	X	B	B	B	B	A	A	A	X	B	A	A	A	A	B	B	B	B	B	A	A	A	X	B	A
Marker2038606	B	B	X	A	A	B	B	A	B	B	B	B	B	X	B	B	B	A	B	A	B	B	B	B	B	A	X	B	A	A	A	A	A	B	A	A	A	A	X	B	A	B	B	A	A	A	H	B	A
Marker2067985	B	B	B	A	A	B	B	A	B	B	B	B	B	B	B	B	B	A	B	A	B	B	B	B	B	A	A	B	A	A	A	A	A	B	A	A	A	A	A	B	A	B	B	A	A	A	H	B	A
Marker2078519	B	B	B	A	A	B	B	A	B	B	B	B	B	B	B	B	B	A	B	A	B	B	B	B	B	A	A	B	A	A	A	A	A	B	A	A	A	A	A	B	A	B	B	A	A	A	X	B	A
Marker2047921	B	B	B	A	A	B	B	A	B	B	B	B	B	B	B	B	B	A	B	A	B	B	B	B	B	A	A	B	A	A	A	A	A	B	A	A	A	A	A	B	A	B	B	A	A	A	H	B	A
Marker2022131	B	B	X	A	A	B	B	A	B	B	B	B	B	B	X	B	B	A	B	A	B	B	B	B	X	A	A	B	X	A	A	A	A	B	A	A	A	A	A	B	A	B	B	A	A	A	X	B	B
Marker2036965	B	B	A	A	H	B	B	A	B	B	B	B	B	B	B	B	B	A	B	A	B	B	B	B	X	A	X	B	B	A	B	A	A	B	A	A	A	A	A	B	A	B	B	A	A	A	B	B	B
Marker2078097	B	B	X	A	X	B	B	A	B	B	B	B	B	B	X	B	B	A	B	A	B	B	B	B	X	A	A	B	X	A	B	A	X	B	A	A	A	A	A	B	A	B	B	A	A	A	B	B	X
Marker1997937	B	B	A	A	X	B	B	A	B	B	B	B	B	B	B	B	B	A	B	A	B	B	B	B	A	A	A	B	B	A	B	A	X	B	A	A	B	A	A	B	A	B	B	A	A	A	B	B	B
Marker2022686	X	B	A	A	X	B	B	A	B	B	B	B	B	B	B	B	B	A	B	A	B	B	B	B	A	A	A	B	B	A	B	A	X	B	A	A	A	A	A	B	A	B	B	A	A	A	B	B	B
Marker2039467	B	B	A	A	A	B	B	A	B	B	B	B	B	B	B	B	B	A	B	A	B	B	B	B	X	A	A	B	X	A	B	A	A	B	A	A	B	A	A	B	A	B	B	A	A	A	B	B	B
Marker2074375	X	B	A	A	A	B	B	A	B	B	B	B	B	B	B	B	B	A	B	A	B	B	B	B	A	A	A	B	X	A	B	A	A	B	A	A	B	A	A	B	A	B	B	A	A	A	B	B	B
Marker2074080	X	B	A	A	H	B	B	A	B	B	B	B	B	B	B	B	B	A	B	A	B	B	B	B	A	A	A	B	A	A	B	A	X	B	A	A	B	A	A	B	A	B	B	A	A	A	B	B	X
Marker2018981	B	B	A	A	H	B	B	A	B	B	B	B	B	B	B	B	B	A	B	A	B	B	B	B	A	A	A	B	X	A	B	A	A	B	A	A	B	A	A	B	A	B	B	A	A	A	B	B	B
Marker2025762	B	B	A	A	H	B	B	A	B	B	B	B	B	B	B	B	B	A	B	A	B	B	B	B	A	A	A	B	B	A	B	A	A	B	A	A	B	A	A	B	A	B	B	A	A	A	B	B	B
Marker2074754	B	B	A	A	A	B	B	A	B	B	B	B	B	B	B	B	B	A	B	A	B	B	B	B	A	A	A	B	X	A	B	A	A	B	A	A	B	A	A	B	A	B	B	A	A	A	B	B	B
Marker2046131	B	B	A	A	A	B	B	A	B	B	B	B	B	B	B	B	B	A	B	A	B	B	B	B	A	A	A	B	A	A	B	A	A	B	A	A	B	A	A	B	A	B	B	A	A	A	B	B	B
Marker2056089	B	B	A	A	A	B	B	A	B	B	B	B	B	B	B	B	B	A	B	A	B	B	B	B	A	A	A	B	A	A	B	A	A	B	A	A	B	A	A	B	A	B	B	A	A	A	B	B	B
Marker2031638	B	B	A	A	A	B	B	A	B	B	B	B	B	B	B	B	B	A	B	A	B	B	B	B	A	A	A	B	A	A	B	A	A	B	A	A	B	A	A	B	A	B	B	A	A	A	B	B	H
Marker2050713	B	B	A	A	X	B	B	A	B	B	B	B	B	B	B	B	B	A	B	A	B	B	B	B	A	A	A	B	X	A	B	A	X	B	A	A	X	A	A	B	A	B	B	A	A	A	B	B	X
Marker2067252	B	B	A	A	A	B	B	A	B	B	B	B	B	B	B	B	B	A	B	A	B	B	B	B	A	A	A	B	A	A	B	A	A	B	A	A	B	A	A	B	A	B	B	A	A	A	B	B	H
Marker1988204	B	B	A	A	A	B	B	A	B	B	B	B	B	B	B	B	B	A	B	A	B	B	B	B	A	A	A	B	A	A	B	A	X	B	A	A	B	A	A	B	A	B	B	A	A	A	B	B	H
Marker2057072	B	B	A	A	A	B	B	A	B	B	B	B	B	B	B	B	B	A	B	A	B	B	B	B	A	A	A	B	A	A	B	A	A	B	A	A	B	A	A	B	A	B	B	A	A	A	B	B	B
Marker2010026	B	B	A	A	A	B	B	A	B	B	B	B	B	B	B	B	B	A	B	A	B	B	B	B	A	A	A	B	A	A	B	A	A	B	A	A	B	A	A	B	A	B	B	A	A	A	B	B	B
Marker2008199	B	B	A	A	A	B	B	A	B	B	B	B	B	B	B	B	B	A	B	A	B	B	B	B	A	A	A	B	A	A	B	A	X	B	A	A	B	A	A	B	A	B	B	A	A	A	B	B	H
Marker2044240	B	B	A	A	H	B	B	A	B	B	B	B	B	B	B	B	B	A	B	A	B	B	B	B	A	A	A	B	A	A	B	A	A	B	A	A	B	A	A	B	A	B	B	A	A	A	B	B	H
Marker2034057	B	B	A	A	A	B	B	A	B	B	B	B	B	B	B	B	B	A	B	A	B	B	B	B	A	A	A	B	A	A	B	A	A	B	A	A	B	A	A	B	A	B	B	A	A	A	B	B	B
Marker2031429	B	B	A	A	A	B	B	A	B	B	B	B	B	B	B	B	B	A	B	A	B	B	B	B	A	A	A	B	A	A	B	A	A	B	A	A	B	A	A	B	A	B	B	A	A	A	B	B	B
Marker2012706	B	B	A	A	A	B	B	A	B	B	B	B	B	B	B	B	B	A	B	A	B	B	B	B	A	A	A	B	A	A	B	A	A	B	A	A	B	A	A	B	A	B	B	A	A	A	B	B	B
Marker1995977	B	B	A	A	A	B	B	A	B	B	B	B	B	B	B	B	B	A	B	A	B	B	B	B	A	A	A	B	A	A	B	A	A	B	A	A	B	A	A	B	A	B	B	A	A	A	B	B	B
Marker1995812	B	B	A	A	A	B	B	A	B	B	B	B	B	B	B	B	B	A	B	A	B	B	B	B	A	A	A	B	A	A	B	A	X	B	A	A	H	A	A	B	A	B	B	A	A	A	B	B	B
Marker2030384	B	B	A	A	B	B	B	A	B	B	B	B	B	B	B	B	B	A	B	A	B	B	B	B	A	A	A	B	A	A	B	A	X	B	A	A	H	A	A	B	A	B	B	A	A	A	B	B	B
Marker2057737	B	B	A	A	B	B	B	A	B	B	B	B	B	B	B	B	B	A	B	A	B	B	B	B	A	A	A	B	A	A	B	A	X	B	A	A	B	A	A	B	A	B	B	A	A	A	B	B	B
Marker2018225	B	B	A	A	B	B	B	A	B	B	B	B	B	B	B	B	B	A	B	A	B	B	B	B	A	A	A	B	A	A	B	A	X	B	A	A	B	A	A	B	A	B	B	A	A	A	B	B	B
Marker2045826	B	B	A	A	B	B	B	A	B	B	B	B	B	B	B	B	B	A	B	A	B	B	B	B	A	A	A	B	A	A	B	A	X	B	A	A	B	A	A	B	A	B	B	A	A	A	B	B	B
Marker2047414	B	B	A	A	H	B	B	A	B	B	B	B	B	B	B	B	B	A	B	A	B	B	B	B	A	A	A	B	A	A	B	A	X	B	A	A	B	A	A	B	A	B	B	A	A	A	B	B	B
Marker2059082	B	B	A	A	H	B	B	A	B	B	B	B	B	B	B	B	B	A	B	A	B	B	B	B	A	A	A	B	A	A	B	A	X	B	A	A	B	A	A	B	A	B	B	A	A	A	B	B	B
Marker2014865	B	B	A	A	H	B	B	A	B	B	B	B	B	B	B	B	B	A	B	A	B	B	B	B	A	A	A	B	A	A	B	A	A	B	A	A	B	A	A	B	A	B	B	A	A	A	B	B	B
Marker2073030	B	B	A	A	H	B	B	A	B	B	B	B	B	B	B	B	B	A	B	A	B	B	B	B	A	A	A	B	A	A	B	A	A	B	A	A	B	A	A	B	A	B	B	A	A	A	B	B	B
Marker2030225	B	B	A	A	H	B	B	A	B	B	B	B	B	B	B	B	B	A	B	A	B	B	B	B	A	A	A	B	A	A	B	A	A	B	A	A	B	A	A	B	A	B	B	A	A	A	B	B	B
Marker2031100	B	B	A	A	A	B	B	A	B	B	B	B	B	B	B	B	B	A	B	A	B	B	B	B	A	A	A	B	A	A	B	A	A	B	A	A	H	A	A	B	A	B	B	A	A	A	B	B	B
Marker2004909	B	B	A	A	H	B	B	A	B	B	B	B	B	B	B	B	B	A	B	A	B	B	B	B	A	A	A	B	A	A	B	A	A	B	A	A	H	A	A	B	A	B	B	A	A	A	B	B	B
Marker2005824	B	B	A	A	H	B	B	A	B	B	B	B	B	B	B	B	B	A	B	A	B	B	B	B	A	A	A	B	A	A	B	A	A	B	A	A	B	A	A	B	A	B	B	A	A	A	B	B	B
Marker2065982	B	B	A	A	H	B	B	A	B	B	B	B	B	B	B	B	B	A	B	A	B	B	B	B	A	A	A	B	A	A	B	A	A	B	A	A	B	A	A	B	A	B	B	A	A	A	B	B	B
Marker2015794	B	B	A	A	H	B	B	A	B	B	B	B	B	B	B	B	B	A	B	A	B	B	B	B	A	A	A	B	A	A	B	A	A	B	A	A	H	A	A	B	A	B	B	A	A	A	B	B	B
Marker2063054	B	B	A	A	A	B	B	A	B	B	B	B	B	B	B	B	B	A	B	A	B	B	B	B	A	A	A	B	A	A	B	A	A	B	A	A	B	A	A	B	A	B	B	A	A	A	B	B	B
Marker2018861	B	B	A	A	A	B	B	A	B	B	B	B	B	B	B	B	B	A	B	A	B	B	B	B	A	A	A	B	A	A	B	A	A	B	A	A	B	A	A	B	A	B	B	A	A	A	B	B	B
Marker1993435	B	B	A	A	A	B	B	A	B	B	B	B	B	B	B	B	B	A	B	A	B	B	B	B	A	A	A	B	A	A	B	A	A	B	A	A	B	A	A	B	A	B	B	A	A	A	B	B	B
Marker2062243	B	B	A	A	A	B	B	A	B	B	B	B	B	B	B	B	B	A	B	A	B	B	B	B	A	A	A	B	A	A	B	A	A	B	A	A	B	A	A	B	A	B	B	A	A	A	B	B	B
Marker2056237	B	B	A	A	H	B	B	A	B	B	B	B	B	B	B	B	B	A	B	A	B	B	B	B	A	A	A	B	A	A	B	A	A	B	A	A	B	A	A	B	A	B	B	A	A	A	B	B	B
Marker2022235	B	B	A	A	H	B	B	A	B	B	B	B	B	B	B	B	B	A	B	A	B	B	B	B	A	A	A	B	A	A	B	A	A	B	A	A	B	A	A	B	A	B	B	A	A	A	B	B	B
Marker2052575	B	B	A	A	H	B	B	A	B	B	B	B	B	B	B	B	B	A	B	A	B	B	B	B	A	A	A	B	A	A	B	A	A	B	A	A	H	A	A	B	A	B	B	A	A	A	B	B	B
Marker2046583	B	B	A	A	A	B	B	A	B	B	B	B	B	B	B	B	B	A	B	A	B	B	B	B	A	A	A	B	A	A	B	A	A	B	A	A	H	A	A	B	A	B	B	A	A	A	B	B	B
Marker2041342	B	B	A	A	A	B	B	A	B	B	B	B	B	B	B	B	B	A	B	A	B	B	B	B	A	A	A	B	A	A	B	A	A	B	A	A	H	A	A	B	A	B	B	A	A	A	B	B	B
Marker2046988	B	B	A	A	X	B	B	A	B	B	B	B	B	B	B	B	B	A	B	A	B	B	B	B	A	A	A	B	A	A	B	A	X	B	A	A	B	A	A	B	A	B	B	A	A	A	B	B	B
Marker2027257	B	B	A	A	X	B	B	A	B	B	B	B	B	B	B	B	B	A	B	A	B	B	B	B	A	A	A	B	A	A	B	A	A	B	A	A	H	A	A	B	A	B	B	A	A	A	B	B	B
Marker2078139	B	B	A	A	H	B	B	A	B	B	B	B	B	B	B	B	B	A	B	A	B	B	B	B	A	A	A	B	A	A	B	A	A	B	A	A	B	A	A	B	A	B	B	A	A	A	B	B	B
Marker2010098	B	B	A	A	H	B	B	A	B	B	B	B	B	B	B	B	B	A	B	A	B	B	B	B	A	A	A	B	A	A	B	A	A	B	A	A	B	A	A	B	A	B	B	A	A	A	B	B	B
Marker2042041	B	B	A	A	H	B	B	A	B	B	B	B	B	B	B	B	B	A	B	A	B	B	B	B	A	A	A	B	A	A	B	A	A	B	A	A	H	A	A	B	A	B	B	A	A	A	B	B	B
Marker2071582	B	B	A	A	H	B	B	A	B	B	B	B	B	B	B	B	B	A	B	A	B	B	B	B	A	A	A	B	A	A	B	A	A	B	A	A	H	A	A	B	A	B	B	A	A	A	B	B	B
Marker2007240	B	B	A	A	H	B	B	A	B	B	B	B	B	B	B	B	B	A	B	A	B	B	B	B	A	A	A	B	A	A	B	A	X	B	A	A	H	A	A	B	A	B	B	A	A	A	B	B	B
Marker2067407	B	B	A	A	X	B	B	A	B	B	B	B	B	B	B	B	B	A	B	A	B	B	B	B	A	A	A	B	A	A	B	A	B	B	A	A	B	A	A	B	A	B	B	A	A	A	B	B	B
Marker2004674	B	B	A	A	A	B	B	A	B	B	B	B	B	B	B	B	B	A	B	A	B	B	B	B	A	A	A	B	A	A	B	A	B	B	A	A	B	A	A	B	A	B	B	A	A	A	B	B	B
Marker2040269	B	B	A	A	A	B	B	A	B	B	B	B	B	B	B	B	B	A	B	A	B	B	B	B	A	A	A	B	A	A	B	A	B	B	A	A	B	A	A	B	A	B	B	A	A	A	B	B	B
Marker2044078	B	B	A	A	A	B	B	A	B	B	B	B	B	B	B	B	B	A	B	A	B	B	B	B	A	A	A	B	A	A	B	A	B	B	A	A	B	A	A	B	A	B	B	A	A	A	B	B	B
Marker1990297	B	B	A	A	A	B	B	A	B	B	B	B	B	B	B	B	B	A	B	A	B	B	B	B	A	A	A	B	A	A	B	A	B	B	A	A	B	A	A	B	A	B	B	A	A	A	B	B	B
Marker2084994	B	B	A	A	A	B	B	A	B	B	B	B	B	B	B	B	B	A	B	A	B	B	B	B	A	A	A	B	A	A	B	A	B	B	A	A	B	A	A	B	A	B	B	A	A	A	B	B	B
Marker2058799	B	B	A	A	A	B	B	A	B	B	B	B	B	B	B	B	B	A	B	A	B	B	B	B	A	A	A	B	A	A	B	A	B	B	A	A	H	A	A	B	A	B	B	A	A	A	B	B	B
Marker2001038	B	B	A	A	A	B	B	A	B	B	B	B	B	B	B	B	B	A	B	A	B	B	B	B	A	A	A	B	A	A	B	A	B	B	A	A	H	A	A	B	A	B	B	A	A	A	B	B	B
Marker2057708	B	B	A	A	A	B	B	A	B	B	B	B	B	B	B	B	B	A	B	A	B	B	B	B	A	A	A	B	A	A	B	A	B	B	A	A	H	A	A	B	A	B	B	A	A	A	B	B	B
Marker2016664	B	B	A	A	A	B	B	A	B	B	B	B	B	B	B	B	B	A	B	A	B	B	B	B	A	A	A	B	A	A	B	A	B	B	A	A	H	A	A	B	A	B	B	A	A	A	B	B	B
Marker1996848	B	B	A	A	A	B	B	A	B	B	B	B	B	B	B	B	B	A	B	A	B	B	B	B	A	A	A	B	A	A	B	A	B	B	A	A	H	A	A	B	A	B	B	A	A	A	B	B	B
Marker2028895	B	B	A	A	A	B	B	A	B	B	B	B	B	B	B	B	B	A	B	A	B	B	B	B	A	A	A	B	A	A	B	A	B	B	A	A	H	A	A	B	A	B	B	A	A	A	B	B	B
Marker2010959	B	B	A	A	A	B	B	A	B	B	B	B	B	B	B	B	B	A	B	A	B	B	B	B	A	A	A	B	A	A	B	A	B	B	A	A	H	A	A	B	A	B	B	A	A	A	B	B	B
Marker2024663	B	B	A	A	A	B	B	A	B	B	B	B	B	B	B	B	B	A	B	A	B	B	B	B	A	A	A	B	A	A	B	A	B	B	A	A	H	A	A	B	A	B	B	A	A	A	B	B	B
Marker2022037	B	B	A	A	A	B	B	A	B	B	B	B	B	B	B	B	B	A	B	A	B	B	B	B	A	A	A	B	A	A	B	A	B	B	A	A	H	A	A	B	A	B	B	A	A	A	B	B	B
Marker2006061	B	B	A	A	A	B	B	A	B	B	B	B	B	B	B	B	B	A	B	A	B	B	B	B	A	A	A	B	A	A	B	A	B	B	A	A	H	A	A	B	A	B	B	A	A	A	B	B	B
Marker2045320	B	B	A	A	A	B	B	A	B	B	B	B	B	B	B	B	B	A	B	A	B	B	B	B	A	A	A	B	A	A	B	A	B	B	A	A	H	A	A	B	A	B	B	A	A	A	B	B	B
Marker2036223	B	B	A	A	A	B	B	A	B	B	B	B	B	B	B	B	B	A	B	A	B	B	B	B	A	A	A	B	A	A	B	A	B	B	A	A	H	A	A	B	A	B	B	A	A	A	B	B	B
Marker2064120	B	B	A	A	A	B	B	A	B	B	B	B	B	B	B	B	B	A	B	A	B	B	B	B	A	A	A	B	A	A	B	A	B	B	A	A	B	A	A	B	A	B	B	A	A	A	B	B	B
Marker2014241	B	B	A	A	A	B	B	A	B	B	B	B	B	B	B	B	B	A	B	A	B	B	B	B	A	A	A	B	A	A	B	A	B	B	A	A	B	A	A	B	A	B	B	A	A	A	B	B	B
Marker2083659	B	B	A	A	A	B	B	A	B	B	B	B	B	B	B	B	B	A	B	A	B	B	B	B	A	A	A	B	A	A	B	A	B	B	A	A	B	A	A	B	A	B	B	A	A	A	B	B	B
Marker2003674	B	B	A	A	A	B	B	A	B	B	B	B	B	B	B	B	B	A	B	A	B	B	B	B	A	A	A	B	A	A	B	A	B	B	A	A	B	A	A	B	A	B	B	A	A	A	B	B	B
Marker2060361	B	B	A	A	A	B	B	A	B	B	B	B	B	B	B	B	B	A	B	A	B	B	B	B	A	A	A	B	A	A	B	A	X	B	A	A	B	A	A	B	A	B	B	A	A	A	B	B	B
Marker2017707	B	B	A	A	A	B	B	A	B	B	B	B	B	B	B	B	B	A	B	A	B	B	B	B	A	A	A	B	A	A	B	A	B	B	A	A	B	A	A	B	A	B	B	A	A	A	B	B	B
Marker2018899	B	B	A	A	H	B	B	A	B	B	B	B	B	B	B	B	B	A	B	A	B	B	B	B	A	A	A	B	A	A	B	A	B	B	A	A	B	A	A	B	A	B	B	A	A	A	B	B	B
Marker2085640	B	B	A	A	H	B	B	A	B	B	B	B	B	B	B	B	B	A	B	A	B	B	B	B	A	A	A	B	A	A	B	A	B	B	A	A	B	A	A	B	A	B	B	A	A	A	B	B	B
Marker2045750	B	B	A	A	X	B	B	A	B	B	B	B	B	B	B	B	B	A	B	A	B	B	B	B	A	A	A	B	A	A	B	A	X	B	A	A	B	A	A	B	A	B	B	A	A	A	B	B	B
Marker2036271	B	B	A	A	H	B	B	A	B	B	B	B	B	B	B	B	B	A	B	A	B	B	B	B	A	A	A	B	A	A	B	A	B	B	A	A	B	A	A	B	A	B	B	A	A	A	B	B	B
Marker2087460	B	B	A	A	X	B	B	A	B	B	B	B	B	B	B	B	B	A	B	A	B	B	B	B	A	A	A	B	A	A	B	A	B	B	A	A	B	A	A	B	A	B	B	A	A	A	B	B	B
Marker2079907	B	B	A	A	A	B	B	A	B	B	B	B	B	B	B	B	B	A	B	A	B	B	B	B	A	A	A	B	A	A	B	A	B	B	A	A	B	A	A	B	A	B	B	A	A	A	B	B	B
Marker2057045	B	B	A	A	A	B	B	A	B	B	B	B	B	B	B	B	B	A	B	A	B	B	B	B	A	A	A	B	A	A	B	A	B	B	A	A	H	A	A	B	A	B	B	A	A	A	B	B	B
Marker2021179	B	B	A	A	A	B	B	A	B	B	B	B	B	B	B	B	B	A	B	A	B	B	B	B	A	A	A	B	A	A	B	A	B	B	A	A	H	A	A	B	A	B	B	A	A	A	B	B	B
Marker2010749	B	B	A	A	A	B	B	A	B	B	B	B	B	B	B	B	B	A	B	A	B	B	B	B	A	A	A	B	A	A	B	A	B	B	A	A	H	A	A	B	A	B	B	A	A	A	B	B	B
Marker2053006	B	B	A	A	A	B	B	A	B	B	B	B	B	B	B	B	B	A	B	A	B	B	B	B	A	A	A	B	A	A	B	A	B	B	A	A	H	A	A	B	A	B	B	A	A	A	B	B	B
Marker2039240	B	B	A	A	A	B	B	A	B	B	B	B	B	B	B	B	B	A	B	A	B	B	B	B	A	A	A	B	A	A	B	A	B	B	A	A	H	A	A	B	A	B	B	A	A	A	B	B	B
Marker1991247	B	B	A	A	A	B	B	A	B	B	B	B	B	B	B	B	B	A	B	A	B	B	B	B	A	A	A	B	A	A	B	A	B	B	A	A	H	A	A	B	A	B	B	A	A	A	B	B	B
Marker2083469	B	B	A	A	A	B	B	A	B	B	B	B	B	B	B	B	B	A	B	A	B	B	B	B	A	A	A	B	A	A	B	A	B	B	A	A	H	A	A	B	A	B	B	A	A	A	B	B	B
Marker2031833	B	B	A	A	A	B	B	A	B	B	B	B	B	B	B	B	B	A	B	A	B	B	B	B	A	A	A	B	A	A	B	A	B	B	A	A	H	A	A	B	A	B	B	A	A	A	B	B	B
Marker2028327	B	B	A	A	A	B	B	A	B	B	B	B	B	B	B	B	B	A	B	A	B	B	B	B	A	A	A	B	A	A	B	A	B	B	A	A	H	A	A	B	A	B	B	A	A	A	B	B	H
Marker2060532	B	B	A	A	A	B	B	A	B	B	B	B	B	B	B	B	B	A	B	A	B	B	B	B	A	A	A	B	A	A	B	A	B	B	A	A	H	A	A	B	A	B	B	A	A	A	B	B	B
Marker2011539	B	B	A	A	A	B	B	A	B	B	B	B	B	B	B	B	B	A	B	A	B	B	B	B	A	A	A	B	A	A	B	A	X	B	A	A	B	A	A	B	A	B	B	A	A	A	B	B	B
Marker2000032	B	B	A	A	X	B	B	A	B	B	B	B	B	B	B	B	B	A	B	A	B	B	B	B	A	A	A	B	A	A	B	A	X	B	A	A	B	A	A	B	A	B	B	A	A	A	B	B	B
Marker2085702	B	B	A	A	A	B	B	A	B	B	B	B	B	B	B	B	B	A	B	A	B	B	B	B	A	A	A	B	A	A	B	A	B	B	A	A	H	A	A	B	A	B	B	A	A	A	B	B	B
Marker2053373	B	B	A	A	A	B	B	A	B	B	B	B	B	B	B	B	B	A	B	A	B	B	B	B	A	A	A	B	A	A	B	A	B	B	A	A	H	A	A	B	A	B	B	A	A	A	B	B	X
Marker2042661	B	B	A	A	A	B	B	A	B	B	B	B	B	B	B	B	B	A	B	A	B	B	B	B	A	A	A	B	A	A	B	A	B	B	A	A	H	A	A	B	A	B	B	A	A	A	B	B	B
Marker2085878	B	B	A	A	A	B	B	A	B	B	B	B	B	B	B	B	B	A	B	A	B	B	B	B	A	A	A	B	A	A	B	A	B	B	A	A	H	A	A	B	A	B	B	A	A	A	B	B	B
Marker2053147	B	B	A	A	A	B	B	A	B	B	B	B	B	B	B	B	B	A	B	A	B	B	B	B	A	A	A	B	A	A	B	A	B	B	A	A	X	A	A	B	A	B	B	A	A	A	B	B	B
Marker2035375	B	B	A	A	A	B	B	A	B	B	B	B	B	B	B	B	B	A	B	A	B	B	B	B	A	A	A	B	A	A	B	A	B	B	A	A	H	A	A	B	A	B	B	A	A	A	B	B	X
Marker2049021	B	B	A	A	A	B	B	A	B	B	B	B	B	B	B	B	B	A	B	A	B	B	B	B	A	A	A	B	A	A	B	A	B	B	A	A	A	A	A	B	A	B	B	A	A	A	B	B	B
Marker2042493	B	B	A	A	X	B	B	A	B	B	B	B	B	B	B	B	B	A	B	A	B	B	B	B	A	A	A	B	A	A	B	A	B	B	A	A	H	A	A	B	A	B	B	A	A	A	B	B	B
Marker2078728	B	B	A	A	A	B	B	A	B	B	B	B	B	B	B	B	B	A	B	A	B	B	B	B	A	A	A	B	A	A	B	A	B	B	A	A	B	A	A	B	A	B	B	A	A	A	B	B	B
Marker2013178	B	B	A	A	A	B	B	A	B	B	B	B	B	B	B	B	B	A	B	A	B	B	B	B	A	A	A	B	A	A	B	A	B	B	A	A	B	A	A	B	A	B	B	A	A	A	B	B	B
Marker1995342	B	B	A	A	A	B	B	A	B	B	B	B	B	B	B	B	B	A	B	A	B	B	B	B	A	A	A	B	A	A	B	A	B	B	A	A	B	A	A	B	A	B	B	A	A	A	B	B	B
Marker2019830	B	B	A	A	A	B	B	A	B	B	B	B	B	B	B	B	B	A	B	A	B	B	B	B	A	A	A	B	A	A	B	A	B	B	A	A	B	A	A	B	A	B	B	A	A	A	B	B	B
Marker2009505	B	B	A	A	A	B	B	A	B	B	B	B	B	B	B	B	B	A	B	A	B	B	B	B	A	A	A	B	A	A	B	A	B	B	A	A	X	A	A	B	A	B	B	A	A	A	B	B	B
Marker2051444	B	B	A	A	A	B	B	A	B	B	B	B	B	B	B	B	B	A	B	A	B	B	B	B	A	A	A	B	A	A	B	A	B	B	A	A	H	A	A	B	A	B	B	A	A	A	B	B	B
Marker2007169	B	B	A	A	A	B	B	A	B	B	B	B	B	B	B	B	B	A	B	A	B	B	B	B	A	A	A	B	A	A	B	A	B	B	A	A	H	A	A	B	A	B	B	A	A	A	B	B	B
Marker2017869	B	B	A	A	A	B	B	A	B	B	B	B	B	B	B	B	B	A	B	A	B	B	B	B	A	A	A	B	A	A	B	A	B	B	A	A	A	A	A	B	A	B	B	A	A	A	B	B	B
Marker2064005	B	B	A	A	A	B	B	A	B	B	B	B	B	B	B	B	B	A	B	A	B	B	B	B	A	A	A	B	A	A	B	A	B	B	A	A	X	A	A	B	A	B	B	A	A	A	B	B	B
Marker2049993	B	B	A	A	A	B	B	A	B	B	B	B	B	B	B	B	B	A	B	A	B	B	B	B	A	A	A	B	A	A	B	A	B	B	A	A	X	A	A	B	A	B	B	A	A	A	B	B	B
Marker1994284	B	B	A	A	A	B	B	A	B	B	B	B	B	B	B	B	B	A	B	A	B	B	B	B	A	A	A	B	A	A	B	A	B	B	A	A	A	A	A	B	A	B	B	A	A	A	B	B	B
Marker2012707	B	B	A	A	A	B	B	A	B	B	B	B	B	B	B	B	B	A	B	A	B	B	B	B	A	A	A	B	A	A	B	A	B	B	A	A	A	A	A	B	A	B	B	A	A	A	B	B	B
Marker2061416	B	B	A	A	H	B	B	A	B	B	B	B	B	B	B	B	B	A	B	A	B	B	B	B	A	A	A	B	A	A	B	A	B	B	A	A	H	A	A	B	A	B	B	A	A	A	B	B	B
Marker2057192	B	B	A	A	H	B	B	A	B	B	B	B	B	B	B	B	B	A	B	A	B	B	B	B	A	A	A	B	A	A	B	A	B	B	A	A	H	A	A	B	A	B	B	A	A	A	B	B	B
Marker2018581	B	B	A	A	H	B	B	A	B	B	B	B	B	B	B	B	B	A	B	A	B	B	B	B	A	A	A	B	A	A	B	A	B	B	A	A	H	A	A	B	A	B	B	A	A	A	B	B	B
Marker2077971	B	B	A	A	H	B	B	A	B	B	B	B	B	B	B	B	B	A	B	A	B	B	B	B	A	A	A	B	A	A	B	A	B	B	A	A	H	A	A	B	A	B	B	A	A	A	B	B	B
Marker2034293	B	B	A	A	H	B	B	A	B	B	B	B	B	B	B	B	B	A	B	A	B	B	B	B	A	A	A	B	A	A	B	A	B	B	A	A	H	A	A	B	A	B	B	A	A	A	B	B	B
Marker2079130	B	B	A	A	H	B	B	A	B	B	B	B	B	B	B	B	B	A	B	A	B	B	B	B	A	A	A	B	A	A	B	A	B	B	A	A	X	A	A	B	A	B	B	A	A	A	B	B	B
Marker2080129	B	B	A	A	H	B	B	A	B	B	B	B	B	B	B	B	B	A	B	A	B	B	B	B	A	A	A	B	A	A	B	A	B	B	A	A	H	A	A	B	A	B	B	A	A	A	B	B	B
Marker2040426	B	B	A	A	H	B	B	A	B	B	B	B	B	B	B	B	B	A	B	A	B	B	B	B	A	A	A	B	A	A	B	A	B	B	A	A	H	A	A	B	A	B	B	A	A	A	B	B	B
Marker2036375	B	B	A	A	B	B	B	A	B	B	B	B	B	B	B	B	B	A	B	A	B	B	B	B	A	A	A	B	A	A	B	A	B	B	A	A	H	A	A	B	A	B	B	A	A	A	B	B	B
Marker2010037	B	B	A	A	X	B	B	A	B	B	B	B	B	B	B	B	B	A	B	A	B	B	B	B	A	A	A	B	A	A	B	A	B	B	A	A	B	A	A	B	A	B	B	A	A	A	B	B	B
Marker2056248	B	B	A	A	A	B	B	A	B	B	B	B	B	B	B	B	B	A	B	A	B	B	B	B	A	A	A	B	A	A	B	A	B	B	A	A	B	A	A	B	A	B	B	A	A	A	B	B	B
Marker2080615	B	B	A	A	A	B	B	A	B	B	B	B	B	B	B	B	B	A	B	A	B	B	B	B	A	A	A	B	A	A	B	A	B	B	A	A	B	A	A	B	A	B	B	A	A	A	B	B	B
Marker2004639	B	B	A	A	A	B	B	A	B	B	B	B	B	B	B	B	B	A	B	A	B	B	B	B	A	A	A	B	A	A	B	A	B	B	A	A	B	A	A	B	A	B	B	A	A	A	B	B	B
Marker2011060	B	B	A	A	A	B	B	A	B	B	B	B	B	B	B	B	B	A	B	A	B	B	B	B	A	A	A	B	A	A	B	A	B	B	A	A	B	A	A	B	A	B	B	A	A	A	B	B	B
Marker2079399	B	B	A	A	A	B	B	A	B	B	B	B	B	B	B	B	B	A	B	A	B	B	B	B	A	A	A	B	A	A	B	A	B	B	A	A	B	A	A	B	A	B	B	A	A	A	B	B	H
Marker2042982	B	B	A	A	A	B	B	A	B	B	B	B	B	B	B	B	B	A	B	A	B	B	B	B	A	A	A	B	A	A	B	A	B	B	A	A	B	A	A	B	A	B	B	A	A	A	B	B	H
Marker2067623	B	B	A	A	A	B	B	A	B	B	B	B	B	B	B	B	B	A	B	A	B	B	B	B	A	A	A	B	A	A	B	A	B	B	A	A	B	A	A	B	A	B	B	A	A	A	B	B	H
Marker2005822	B	B	A	A	A	B	B	A	B	B	B	B	B	B	B	B	B	A	B	A	B	B	B	B	A	A	A	B	A	A	B	A	B	B	A	A	B	A	A	B	A	B	B	A	A	A	B	B	H
Marker1989675	B	B	A	A	A	B	B	A	B	B	B	B	B	B	B	B	B	A	B	A	B	B	B	B	A	A	A	B	A	A	B	A	B	B	A	A	B	A	A	B	A	B	B	A	A	A	B	B	B
Marker2048643	B	B	A	A	A	B	B	A	B	B	B	B	B	B	B	B	B	A	B	A	B	B	B	B	A	A	A	B	A	A	B	A	B	B	A	A	B	A	A	B	A	B	B	A	A	A	B	B	B
Marker2009418	B	B	A	A	A	B	B	A	B	B	B	B	B	B	B	B	B	A	B	A	B	B	B	B	A	A	A	B	A	A	B	A	B	B	A	A	B	A	A	B	A	B	B	A	A	A	B	B	B
Marker2069814	B	B	A	A	A	B	B	A	B	B	B	B	B	B	B	B	B	A	B	A	B	B	B	B	A	A	A	B	A	A	B	A	B	B	A	A	B	A	A	B	A	B	B	A	A	A	B	B	B
Marker2031432	B	B	A	A	A	B	B	A	B	B	B	B	B	B	B	B	B	A	B	A	B	B	B	B	A	A	A	B	A	A	B	A	B	B	A	A	B	A	A	B	A	B	B	A	A	A	B	B	B
Marker2041742	B	B	A	A	A	B	B	A	B	B	B	B	B	B	B	B	B	A	B	A	B	B	B	B	A	A	A	B	A	A	B	A	B	B	A	A	B	A	A	B	A	B	B	A	A	A	B	B	B
Marker2078231	B	B	A	A	X	B	B	A	B	B	B	B	B	B	B	B	B	A	B	A	B	B	B	B	A	A	A	B	A	A	B	A	X	B	A	A	B	A	A	B	A	B	B	A	A	A	B	B	B
Marker2049499	B	B	A	A	A	B	B	A	B	B	B	B	B	B	B	B	B	A	B	A	B	B	B	B	A	A	A	B	A	A	B	A	B	B	A	A	B	A	A	B	A	B	B	A	A	A	B	B	B
Marker2012868	B	B	A	A	A	B	B	A	B	B	B	B	B	B	B	B	B	A	B	A	B	B	B	B	A	A	A	B	A	A	B	A	B	B	A	A	B	A	A	B	A	B	B	A	A	A	B	B	B
Marker2070127	B	B	A	A	A	B	B	A	B	B	B	B	B	B	B	B	B	A	B	A	B	B	B	B	A	A	A	B	A	A	B	A	B	B	A	A	B	A	A	B	A	B	B	A	A	A	B	B	B
Marker2032383	B	B	A	A	A	B	B	A	B	B	B	B	B	B	B	B	B	A	B	A	B	B	B	B	A	A	A	B	A	A	B	A	B	B	A	A	B	A	A	B	A	B	B	A	A	A	B	B	H
Marker2033317	B	B	A	A	A	B	B	A	B	B	B	B	B	B	B	B	B	A	B	A	B	B	B	B	A	A	A	B	A	A	B	A	B	B	A	A	B	A	A	B	A	B	B	A	A	A	B	B	H
Marker2053156	B	B	A	A	A	B	B	A	B	B	B	B	B	B	B	B	B	A	B	A	B	B	B	B	A	A	A	B	A	A	B	A	B	B	A	A	B	A	A	B	A	B	B	A	A	A	B	B	X
Marker2047310	B	B	A	A	A	B	B	A	B	B	B	B	B	B	B	B	B	A	B	A	B	B	B	B	A	A	A	B	A	A	B	A	B	B	A	A	B	A	A	B	A	B	B	A	A	A	B	B	H
Marker2018041	B	B	A	A	A	B	B	A	B	B	B	B	B	B	B	B	B	A	B	A	B	B	B	B	A	A	A	B	A	A	B	A	B	B	A	A	B	A	A	B	A	B	B	A	A	A	B	B	B
Marker2068152	B	B	A	A	A	B	B	A	B	B	B	B	B	B	B	B	B	A	B	A	B	B	B	B	A	A	A	B	A	A	B	A	B	B	A	A	B	A	A	B	A	B	B	A	A	A	B	B	B
Marker2083384	B	B	A	A	A	B	B	A	B	B	B	B	B	B	B	B	B	A	B	A	B	B	B	B	A	A	A	B	A	A	B	A	B	B	A	A	B	A	A	B	A	B	B	A	A	A	B	B	X
Marker2082075	B	B	A	A	A	B	B	A	B	B	B	B	B	B	B	B	B	A	B	A	B	B	B	B	A	A	A	B	A	A	B	A	B	B	A	A	B	A	A	B	A	B	B	A	A	A	B	B	H
Marker2057769	B	B	A	A	A	B	B	A	B	B	B	B	B	B	B	B	B	A	B	A	B	B	B	B	A	A	A	B	A	A	B	A	B	B	A	A	B	A	A	B	A	B	B	A	A	A	B	B	H
Marker2011318	B	B	A	A	A	B	B	A	B	B	B	B	B	B	B	B	B	A	B	A	B	B	B	B	A	A	A	B	A	A	B	A	B	B	A	A	B	A	A	B	A	B	B	A	A	A	B	B	H
Marker2044133	B	B	A	A	A	B	B	A	B	B	B	B	B	B	B	B	B	A	B	A	B	B	B	B	A	A	A	B	A	A	B	A	B	B	A	A	B	A	A	B	A	B	B	A	A	A	B	B	H
Marker2020885	B	B	A	A	A	B	B	A	B	B	B	B	B	B	B	B	B	A	B	A	B	B	B	B	A	A	A	B	A	A	B	A	B	B	A	A	B	A	A	B	A	B	B	A	A	A	B	B	H
Marker2044161	B	B	A	A	A	B	B	A	B	B	B	B	B	B	B	B	B	A	B	A	B	B	B	B	A	A	A	B	A	A	B	A	B	B	A	A	B	A	A	B	A	B	B	A	A	A	B	B	B
Marker1998060	B	B	A	A	A	B	B	A	B	B	B	B	B	B	B	B	B	A	B	A	B	B	B	B	A	A	A	B	A	A	B	A	B	B	A	A	B	A	A	B	A	B	B	A	A	A	B	B	B
Marker2001592	B	B	A	A	A	B	B	A	B	B	B	B	B	B	B	B	B	A	B	A	B	B	B	B	A	A	A	B	A	A	B	A	B	B	A	A	B	A	A	B	A	B	B	A	A	A	B	B	B
Marker1989672	B	B	A	A	A	B	B	A	B	B	B	B	B	B	B	B	B	A	B	A	B	B	B	B	A	A	A	B	A	A	B	A	B	B	A	A	B	A	A	B	A	B	B	A	A	A	B	B	B
Marker2015042	B	B	A	A	A	B	B	A	B	B	B	B	B	B	B	B	B	A	B	A	B	B	B	B	A	A	A	B	A	A	B	A	B	B	A	A	B	A	A	B	A	B	B	A	A	A	B	B	B
Marker2025137	B	B	A	A	A	B	B	A	B	B	B	B	B	B	B	B	B	A	B	A	B	B	B	B	A	A	A	B	A	A	B	A	B	B	A	A	B	A	A	B	A	B	B	A	A	A	B	B	B
Marker1988829	B	B	A	A	A	B	B	A	B	B	B	B	B	B	B	B	B	A	B	A	B	B	B	B	A	A	A	B	A	A	B	A	B	B	A	A	B	A	A	B	A	B	B	A	A	A	B	B	B
Marker2035264	B	B	A	A	A	B	B	A	B	B	B	B	B	B	B	B	B	A	B	A	B	B	B	B	A	A	A	B	A	A	B	A	X	B	A	A	B	A	A	B	A	B	B	A	A	A	B	B	B
Marker2046321	B	B	A	A	X	B	B	A	B	B	B	B	B	B	B	B	B	A	B	A	B	B	B	B	A	A	A	B	A	A	B	A	X	B	A	A	B	A	A	B	A	B	B	A	A	A	B	B	B
Marker1993626	B	B	A	A	A	B	B	A	B	B	B	B	B	B	B	B	B	A	B	A	B	B	B	B	A	A	A	B	A	A	B	A	B	B	A	A	B	A	A	B	A	B	B	A	A	A	B	B	B
Marker2046832	B	B	A	A	A	B	B	A	B	B	B	B	B	B	B	B	B	A	B	A	B	B	B	B	A	A	A	B	A	A	B	A	B	B	A	A	B	A	A	B	A	B	B	A	A	A	B	B	B
Marker2000761	B	B	A	A	A	B	B	A	B	B	B	B	B	B	B	B	B	A	B	A	B	B	B	B	A	A	A	B	A	A	B	A	B	B	A	A	B	A	A	B	A	B	B	A	A	A	B	B	B
Marker2057885	B	B	A	A	X	B	B	A	B	B	B	B	B	B	B	B	B	A	B	A	B	B	B	B	A	A	A	B	A	A	B	A	B	B	A	A	X	A	A	B	A	B	B	A	A	A	B	B	B
Marker2054837	B	B	A	A	B	B	B	A	B	B	B	B	B	B	B	B	B	A	B	A	B	B	B	B	A	A	A	B	A	A	B	A	B	B	A	A	H	A	A	B	A	B	B	A	A	A	B	B	B
Marker2084948	B	B	A	A	B	B	B	A	B	B	B	B	B	B	B	B	B	A	B	A	B	B	B	B	A	A	A	B	A	A	B	A	B	B	A	A	X	A	A	B	A	B	B	A	A	A	B	B	H
Marker2001865	B	B	A	A	B	B	B	A	B	B	B	B	B	B	B	B	B	A	B	A	B	B	B	B	A	A	A	B	A	A	B	A	B	B	A	A	H	A	A	B	A	B	B	A	A	A	B	B	H
Marker2026078	B	B	A	A	B	B	B	A	B	B	B	B	B	B	B	B	B	A	B	A	B	B	B	B	A	A	A	B	A	A	B	A	B	B	A	A	B	A	A	B	A	B	B	A	A	A	B	B	H
Marker2002973	B	B	A	A	X	B	B	A	B	B	B	B	B	B	B	B	B	A	B	A	B	B	B	B	A	A	A	B	A	A	B	A	B	B	A	A	B	A	A	B	A	B	B	A	A	A	B	B	H
Marker2049482	B	B	A	A	H	B	B	A	B	B	B	B	B	B	B	B	B	A	B	A	B	B	B	B	A	A	A	B	A	B	B	A	B	B	A	A	X	A	A	B	A	B	B	A	A	A	B	B	X
Marker2059365	B	B	A	A	H	B	B	A	B	B	B	B	B	B	B	B	B	A	B	A	B	B	B	B	A	A	A	B	A	B	B	A	B	B	A	A	H	A	A	B	A	B	B	A	A	A	B	B	B
Marker2017281	B	B	A	A	X	B	B	A	B	B	B	B	B	B	B	B	B	A	B	A	B	B	B	B	A	A	A	B	A	B	B	A	X	B	A	A	H	A	A	B	A	B	B	A	A	A	B	B	B
Marker2004315	B	B	A	A	H	B	B	A	B	B	B	B	B	B	B	B	B	A	B	A	B	B	B	B	A	A	A	B	A	B	B	A	B	B	A	A	B	A	A	B	A	B	B	A	A	A	B	B	B
Marker2072779	B	B	A	A	H	B	B	A	B	B	B	B	B	B	B	B	B	A	B	A	B	B	B	B	A	A	A	B	A	B	B	A	B	B	A	A	B	A	A	B	A	B	B	A	A	A	B	B	B
Marker2013578	B	B	A	A	A	B	B	A	B	B	B	B	B	B	B	B	B	A	B	A	B	B	B	B	A	A	A	B	A	B	B	A	B	B	A	A	B	A	A	B	A	B	B	A	A	A	B	B	B
Marker2061387	B	B	A	A	A	B	B	A	B	B	B	B	B	B	B	B	B	A	B	A	B	B	B	B	A	A	A	B	A	B	B	A	B	B	A	A	B	A	A	B	A	B	B	A	A	A	B	B	X
Marker2045859	B	B	A	A	A	B	B	A	B	B	B	B	B	B	B	B	B	A	B	A	B	B	B	B	A	A	A	B	A	B	B	A	X	B	A	A	B	A	A	B	A	B	B	A	A	A	B	B	B
Marker2033210	B	B	A	A	A	B	B	A	B	B	B	B	B	B	B	B	B	A	B	A	B	B	B	B	A	A	A	B	A	B	B	A	B	B	A	A	B	A	A	B	A	B	B	A	A	A	B	B	B
Marker2014486	B	B	A	A	A	B	B	A	B	B	B	B	B	B	B	B	B	A	B	A	B	B	B	B	A	A	A	B	A	B	B	A	B	B	A	A	B	A	A	B	A	B	B	A	A	A	B	B	X
Marker2073918	B	B	A	A	A	B	B	A	B	B	B	B	B	B	B	B	B	A	B	A	B	B	B	B	A	A	A	B	A	B	B	A	B	B	A	A	B	A	A	B	A	B	B	A	A	A	B	B	B
Marker2056705	B	B	A	A	A	B	B	A	B	B	B	B	B	B	B	B	B	A	B	A	B	B	B	B	A	A	A	B	A	B	B	A	B	B	A	A	X	A	A	B	A	B	B	A	A	A	B	B	B
Marker2034617	B	B	A	A	A	B	B	A	B	B	B	B	B	B	B	B	B	A	B	A	B	B	B	B	A	A	A	B	A	B	B	A	B	B	A	A	B	A	A	B	A	B	B	A	A	A	B	B	B
Marker2014810	B	B	A	A	A	B	B	A	B	B	B	B	B	B	B	B	B	A	B	A	B	B	B	B	X	A	A	B	A	B	B	A	B	B	A	A	B	A	A	B	A	B	B	A	A	A	B	B	B
Marker2029481	B	B	A	A	A	B	B	A	B	B	B	B	B	B	B	B	B	A	B	A	B	B	B	B	X	A	A	B	A	B	B	A	X	B	A	A	B	A	A	B	A	B	B	A	A	A	B	B	B
Marker2060059	B	B	A	A	A	B	B	A	B	B	B	B	B	B	B	B	B	A	B	A	B	B	B	B	X	A	A	B	A	B	B	A	X	B	A	A	B	A	A	B	A	B	B	A	A	A	B	B	B
Marker2023276	B	B	A	A	A	B	B	A	B	B	B	B	B	B	B	B	B	A	B	A	B	B	B	B	A	A	A	B	A	B	B	A	B	B	A	A	B	A	A	B	A	B	B	A	A	A	B	B	B
Marker2069607	B	B	A	A	A	B	B	A	B	B	B	B	B	B	B	B	B	A	B	A	B	B	B	B	A	A	A	B	A	B	B	A	B	B	A	A	X	A	A	B	A	B	B	A	A	A	B	B	B
Marker1999570	B	B	A	A	A	B	B	A	B	B	B	B	B	B	B	B	B	A	B	A	B	B	B	B	A	A	A	B	A	B	B	A	X	B	A	A	B	A	A	B	A	B	B	A	A	A	B	B	B
Marker1999369	B	B	A	A	A	B	B	A	B	B	B	B	B	B	B	B	B	A	B	A	B	B	B	B	A	A	A	B	A	B	B	A	X	B	A	A	B	A	A	B	A	B	B	A	A	A	B	B	B
Marker2085297	B	B	A	A	A	B	B	A	B	B	B	B	B	B	B	B	B	A	B	A	B	B	B	B	A	A	A	B	A	B	B	A	B	B	A	A	B	A	A	B	A	B	B	A	A	A	B	B	B
Marker2060849	B	B	A	A	A	B	B	A	B	B	B	B	B	B	B	B	B	A	B	A	B	B	B	B	A	A	A	B	A	B	B	A	B	B	A	A	H	A	A	B	A	B	B	A	A	A	B	B	B
Marker2043715	B	B	A	A	H	B	B	A	B	B	B	B	B	B	B	B	B	A	B	A	B	B	B	B	A	A	A	B	A	B	B	A	B	B	A	A	H	A	A	B	A	B	B	A	A	A	B	B	B
Marker2049007	B	B	A	A	X	B	B	A	B	B	B	B	B	B	B	B	B	A	B	A	B	B	B	B	X	A	A	B	X	B	B	A	X	B	A	A	A	A	A	B	A	B	B	A	A	A	B	B	B
Marker2066254	B	B	A	A	X	B	B	A	B	B	B	B	B	B	B	B	B	A	B	A	B	B	B	B	X	A	A	B	A	B	B	A	B	B	A	A	A	A	A	B	A	B	B	A	A	A	B	B	B
Marker2044465	B	B	A	A	A	B	B	A	B	B	B	B	B	B	B	B	B	A	B	A	B	B	B	B	A	A	A	B	A	B	B	A	B	B	A	A	H	A	A	B	A	B	B	A	A	A	B	B	B
Marker2000746	B	B	A	A	A	B	B	A	B	B	B	B	B	B	B	B	B	A	B	A	B	B	B	B	X	A	A	B	X	B	B	A	X	B	A	A	A	A	A	B	A	B	B	A	A	A	B	B	B
Marker2000918	B	B	A	A	H	B	B	A	B	B	B	B	B	B	B	B	B	A	B	A	B	B	B	B	A	A	A	B	X	B	B	A	B	B	A	A	A	A	A	B	A	B	B	A	A	A	B	B	B
Marker1996746	B	B	A	A	A	B	B	A	B	B	B	B	B	B	B	B	B	A	B	A	B	B	B	B	X	A	A	B	A	B	B	A	B	B	A	A	A	A	A	B	A	B	B	A	A	A	B	B	B
Marker2077176	B	B	A	A	A	B	B	A	B	B	B	B	B	B	B	B	B	A	B	A	B	B	B	B	A	A	A	B	A	B	B	A	B	B	A	A	H	A	A	B	A	B	B	A	A	A	B	B	B
Marker1990248	B	B	A	A	A	B	B	A	B	B	B	B	B	B	B	B	B	A	B	A	B	B	B	B	X	A	A	B	A	B	B	A	X	B	A	A	X	A	A	B	A	B	B	A	A	A	B	B	B
Marker2051846	B	B	A	A	A	B	B	A	B	B	B	B	B	B	B	B	B	A	B	A	B	B	B	B	A	A	A	B	A	B	B	A	B	B	A	A	B	A	A	B	A	B	B	A	A	A	B	B	B
Marker2027458	B	B	A	A	H	B	B	A	B	B	B	B	B	B	B	B	B	A	B	A	B	B	B	B	X	A	A	B	A	B	B	A	B	B	A	A	B	A	A	B	A	B	B	A	A	A	B	B	B
Marker2018155	B	B	A	A	X	B	B	A	B	B	B	B	B	B	B	B	B	A	B	A	B	B	B	B	A	A	A	B	X	B	B	A	X	B	A	A	B	A	A	B	A	B	B	A	A	A	B	B	B
Marker2030250	B	B	A	A	H	B	B	A	B	B	B	B	B	B	B	B	B	A	B	A	B	B	B	B	X	A	A	B	X	B	B	A	X	B	A	A	B	A	A	B	A	B	B	A	A	A	B	B	B
Marker2063437	B	B	A	A	A	B	B	A	B	B	B	B	B	B	B	B	B	A	B	A	B	B	B	B	A	A	A	B	A	B	B	A	B	B	A	A	B	A	A	B	A	B	B	A	A	A	B	B	B
Marker2084355	B	B	A	A	H	B	B	A	B	B	B	B	B	B	B	B	B	A	B	A	B	B	B	B	A	A	A	B	A	B	B	A	B	B	A	A	B	A	A	B	A	B	B	A	A	A	B	B	B
Marker2012009	B	B	A	A	X	B	B	A	B	B	B	B	B	B	B	B	B	A	B	A	B	B	B	B	A	A	A	B	A	B	B	A	X	B	A	A	B	A	A	B	A	B	B	A	A	A	B	B	B
Marker2015475	B	B	A	A	A	B	B	A	B	B	B	B	B	B	B	B	B	A	B	A	B	B	B	B	A	A	A	B	A	B	B	A	A	B	A	A	B	A	A	B	A	B	B	A	A	A	B	B	B
Marker1998501	B	B	A	A	A	B	B	A	B	B	B	B	B	B	B	B	B	A	B	A	B	B	B	B	A	A	A	B	A	B	B	A	X	B	A	A	B	A	A	B	A	B	B	A	A	A	B	B	B
Marker2034655	B	B	A	A	A	B	B	A	B	B	B	B	B	B	B	B	B	A	B	A	B	B	B	B	A	A	A	B	A	B	B	A	B	B	A	A	B	A	A	B	A	B	B	A	A	A	B	B	B
Marker2052388	B	B	A	A	H	B	B	A	B	B	B	B	B	B	B	B	B	A	B	A	B	B	B	B	A	A	A	B	A	B	B	A	B	B	A	A	B	A	A	B	A	B	B	A	A	A	B	B	B
Marker2000536	B	B	A	A	X	B	B	A	B	B	B	B	B	B	B	B	B	A	B	A	B	B	B	B	A	A	A	B	A	B	B	A	B	B	A	A	A	A	A	B	A	B	B	A	A	A	B	B	B
Marker2062660	B	B	A	A	A	B	B	A	B	B	B	B	B	B	B	B	B	A	B	A	B	B	B	B	A	A	A	B	A	B	B	A	B	B	A	A	A	A	A	B	A	B	B	A	A	A	B	B	B
Marker2044105	B	B	A	A	A	B	B	A	B	B	B	B	B	B	B	B	B	A	B	A	B	B	B	B	A	A	A	B	A	B	B	A	B	B	A	A	A	A	A	B	A	B	B	A	A	A	B	B	B
Marker2060735	B	B	A	A	A	B	B	A	B	B	B	B	B	B	B	B	B	A	B	A	B	B	B	B	A	A	A	B	A	B	B	A	B	B	A	A	A	A	A	B	A	B	B	A	A	A	B	B	B
Marker2039104	B	B	A	A	A	B	B	A	B	B	B	B	B	B	B	B	B	A	B	A	B	B	B	B	A	A	A	B	A	B	B	A	B	B	A	A	H	A	A	B	A	B	B	A	A	A	B	B	B
Marker2081975	B	B	A	A	A	B	B	A	B	B	B	B	B	B	B	B	B	A	B	A	B	B	B	B	A	A	A	B	A	B	B	A	B	B	A	A	H	A	A	B	A	B	B	A	A	A	B	B	B
Marker1997047	B	B	A	A	A	B	B	A	B	B	B	B	B	B	B	B	B	A	B	A	B	B	B	B	A	A	A	B	A	B	B	A	X	B	A	A	H	A	A	B	A	B	B	A	A	A	B	B	B
Marker2067414	B	B	A	A	A	B	B	A	B	B	B	B	B	B	B	B	B	A	B	A	B	B	B	B	A	A	A	B	A	B	B	A	B	B	A	A	B	A	A	B	A	B	B	A	A	A	B	B	B
Marker2042521	B	B	A	A	A	B	B	A	B	B	B	B	B	B	B	B	B	A	B	A	B	B	B	B	A	A	A	B	A	B	B	A	B	B	A	A	B	A	A	B	A	B	B	A	A	A	B	B	B
Marker2003739	B	B	A	A	A	B	B	A	B	B	B	B	B	B	B	B	B	A	B	A	B	B	B	B	A	A	A	B	A	B	B	A	X	B	A	A	H	A	A	B	A	B	B	A	A	A	B	B	B
Marker2014499	B	B	A	A	A	B	B	A	B	B	B	B	B	B	B	B	B	A	B	A	B	B	B	B	A	A	A	B	A	B	B	A	A	B	A	A	B	A	A	B	A	B	B	A	A	A	B	B	B
Marker2045915	B	B	A	A	A	B	B	A	B	B	B	B	B	B	B	B	B	A	B	A	B	B	B	B	A	A	A	B	A	B	B	A	A	B	A	A	B	A	A	B	A	B	B	A	A	A	B	B	B
Marker2033508	B	B	A	A	A	B	B	A	B	B	B	B	B	B	B	B	B	A	B	A	B	B	B	B	A	A	A	B	A	B	B	A	X	B	A	A	B	A	A	B	A	B	B	A	A	A	B	B	B
Marker2004481	B	B	A	A	A	B	B	A	B	B	B	B	B	B	B	B	B	A	B	A	B	B	B	B	A	A	A	B	A	B	B	A	B	B	A	A	B	A	A	B	A	B	B	A	A	A	B	B	B
Marker2038937	B	B	A	A	A	B	B	A	B	B	B	B	B	B	B	B	B	A	B	A	B	B	B	B	A	A	A	B	A	B	B	A	X	B	A	A	B	A	A	B	A	B	B	A	A	A	B	B	B
Marker2058957	B	B	A	A	A	B	B	A	B	B	B	B	B	B	B	B	B	A	B	A	B	B	B	B	A	A	A	B	A	B	B	A	X	B	A	A	B	A	A	B	A	B	B	A	A	A	B	B	B
Marker1999186	B	B	A	A	A	B	B	A	B	B	B	B	B	B	B	B	B	A	B	A	B	B	B	B	A	A	A	B	A	B	B	A	B	B	A	A	B	A	A	B	A	B	B	A	A	A	B	B	B
Marker2026423	B	B	A	A	A	B	B	A	B	B	B	B	B	B	B	B	B	A	B	A	B	B	B	B	A	A	A	B	A	B	B	A	B	B	A	A	B	A	A	B	A	B	B	A	A	A	B	B	B
Marker2026079	B	B	A	A	A	B	B	A	B	B	B	B	B	B	B	B	B	A	B	A	B	B	B	B	A	A	A	B	A	B	B	A	B	B	A	A	B	A	A	B	A	B	B	A	A	A	B	B	B
Marker2007714	B	B	A	A	A	B	B	A	B	B	B	B	B	B	B	B	B	A	B	A	B	B	B	B	A	A	A	B	A	B	B	A	X	B	A	A	B	A	A	B	A	B	B	A	A	A	B	B	B
Marker2024780	B	B	A	A	A	B	B	A	B	B	B	B	B	B	B	B	B	A	B	A	B	B	B	B	A	A	A	B	A	B	B	A	B	B	A	A	B	A	A	B	A	B	B	A	A	A	B	B	B
Marker2074074	B	B	A	A	A	B	B	A	B	B	B	B	B	B	B	B	B	A	B	A	B	B	B	B	A	A	A	B	A	B	B	A	B	B	A	A	B	A	A	B	A	B	B	A	A	A	B	B	B
Marker2085951	B	B	A	A	A	B	B	A	B	B	B	B	B	B	B	B	B	A	B	A	B	B	B	B	A	A	A	B	A	B	B	A	B	B	A	A	B	A	A	B	A	B	B	A	A	A	B	B	B
Marker2001626	B	B	A	A	A	B	B	A	B	B	B	B	B	B	B	B	B	A	B	A	B	B	B	B	A	A	A	B	A	B	B	A	X	B	A	A	B	A	A	B	A	B	B	A	A	A	B	B	B
Marker2076276	B	B	A	A	A	B	B	A	B	B	B	B	B	B	B	B	B	A	B	A	B	B	B	B	A	A	A	B	A	B	B	A	X	B	A	A	B	A	A	B	A	B	B	A	A	A	B	B	B
Marker2076190	B	B	A	A	A	B	B	A	B	B	B	B	B	B	B	B	B	A	B	A	B	B	B	B	A	A	A	B	A	B	B	A	X	B	A	A	B	A	A	B	A	B	B	A	A	A	B	B	B
Marker2057110	B	B	A	A	A	B	B	A	B	B	B	B	B	B	B	B	B	A	B	A	B	B	B	B	A	A	A	B	A	B	B	A	B	B	A	A	B	A	A	B	A	B	B	A	A	A	B	B	B
Marker2016264	B	B	A	A	A	B	B	A	B	B	B	B	B	B	B	B	B	A	B	A	B	B	B	B	A	A	A	B	A	B	B	A	B	B	A	A	H	A	A	B	A	B	B	A	A	A	B	B	H
Marker2013602	B	B	A	A	A	B	B	A	B	B	B	B	B	B	B	B	B	A	B	A	B	B	B	B	A	A	A	B	A	B	B	A	B	B	A	A	H	A	A	B	A	B	B	A	A	A	B	B	H
Marker2041142	B	B	A	A	A	B	B	A	B	B	B	B	B	B	B	B	B	A	B	A	B	B	B	B	A	A	A	B	A	B	B	A	X	B	A	A	X	A	A	B	A	B	B	A	A	A	B	B	H
Marker2045658	B	B	A	A	A	B	B	A	B	B	B	B	B	B	B	B	B	A	B	A	B	B	B	B	A	A	A	B	A	B	B	A	X	B	A	A	H	A	A	B	A	B	B	A	A	A	B	B	B
Marker2057745	B	B	A	A	A	B	B	A	B	B	B	B	B	B	B	B	B	A	B	A	B	B	B	B	A	A	A	B	A	B	B	A	B	B	A	A	H	A	A	B	A	B	B	A	A	A	B	B	B
Marker2038536	B	B	A	A	A	B	B	A	B	B	B	B	B	B	B	B	B	A	B	A	B	B	B	B	A	A	A	B	A	B	B	A	X	B	A	A	H	A	A	B	A	B	B	A	A	A	B	B	B
Marker2033120	B	B	A	A	H	B	B	A	B	B	B	B	B	B	B	B	B	A	B	A	B	B	B	B	A	A	A	B	A	B	B	A	B	B	A	A	H	A	A	B	A	B	B	A	A	A	B	B	B
Marker2039305	B	B	A	A	A	B	B	A	B	B	B	B	B	B	B	B	B	A	B	A	B	B	B	B	A	A	A	B	A	B	B	A	B	B	A	A	X	A	A	B	A	B	B	A	A	A	B	B	B
Marker2014883	B	B	A	A	A	B	B	A	B	B	B	B	B	B	B	B	B	A	B	A	B	B	B	B	A	A	A	B	A	B	B	A	B	B	A	A	H	A	A	B	A	B	B	A	A	A	B	B	B
Marker2002927	B	B	A	A	A	B	B	A	B	B	B	B	B	B	B	B	B	A	B	A	B	B	B	B	A	A	A	B	A	B	B	A	B	B	A	A	H	A	A	B	A	B	B	A	A	A	B	B	B
Marker2031699	B	B	A	A	A	B	B	A	B	B	B	B	B	B	B	B	B	A	B	A	B	B	B	B	A	A	A	B	A	B	B	A	B	B	A	A	H	A	A	B	A	B	B	A	A	A	B	B	B
Marker1988387	B	B	A	A	A	B	B	A	B	B	B	B	B	B	B	B	B	A	B	A	B	B	B	B	A	A	A	B	A	B	B	A	B	B	A	A	B	A	A	B	A	B	B	A	A	A	B	B	B
Marker2068550	B	B	A	A	A	B	B	A	B	B	B	B	B	B	B	B	B	A	B	A	B	B	B	B	A	A	A	B	A	B	B	A	X	B	A	A	B	A	A	B	A	B	B	A	A	A	B	B	B
Marker2072816	B	B	A	A	X	B	B	A	B	B	B	B	B	B	B	B	B	A	B	A	B	B	B	B	A	A	A	B	A	B	B	A	X	B	A	A	B	A	A	B	A	B	B	A	A	A	B	B	B
Marker2046350	B	B	A	A	X	B	B	A	B	B	B	B	B	B	B	B	B	A	B	A	B	B	B	B	A	A	A	B	A	B	B	A	B	B	A	A	B	A	A	B	A	B	B	A	A	A	B	B	B
Marker2031219	B	B	A	A	H	B	B	A	B	B	B	B	B	B	B	B	B	A	B	A	B	B	B	B	A	A	A	B	A	B	B	A	B	B	A	A	B	A	A	B	A	B	B	A	A	A	B	B	B
Marker2002882	B	B	A	A	A	B	B	A	B	B	B	B	B	B	B	B	B	A	B	A	B	B	B	B	A	A	A	B	A	B	B	A	B	B	A	A	B	A	A	B	A	B	B	A	A	A	B	B	B
Marker2051118	B	B	A	A	A	B	B	A	B	B	B	B	B	B	X	B	B	A	B	A	B	B	B	B	A	A	A	B	A	B	B	A	B	B	A	A	H	A	A	B	A	B	B	A	A	A	B	B	B
Marker2055414	B	B	A	A	H	B	B	A	B	B	B	B	B	B	X	B	B	A	B	A	B	B	B	B	A	A	A	B	A	B	B	A	B	B	A	A	H	A	A	B	A	B	B	A	A	A	B	B	B
Marker2066449	B	B	A	A	H	B	B	A	B	B	B	B	B	B	B	B	B	A	B	A	B	B	B	B	A	A	A	B	A	B	B	A	B	B	A	A	H	A	A	B	A	B	B	A	A	A	B	B	B
Marker2055113	B	B	A	A	X	B	B	A	B	B	B	B	B	B	X	B	B	A	B	A	B	B	B	B	A	A	A	B	A	B	B	A	B	B	A	A	X	A	A	B	A	B	B	A	A	A	B	B	B
Marker2008542	B	B	A	A	A	B	B	A	B	B	B	B	B	B	B	B	B	A	B	A	B	B	B	B	A	A	A	B	A	B	B	A	B	B	A	A	H	A	A	B	A	B	B	A	A	A	B	B	B
Marker1995762	B	B	A	A	H	B	B	A	B	B	B	B	B	B	B	B	B	A	B	A	B	B	B	B	A	A	A	B	A	B	B	A	B	B	A	A	H	A	A	B	A	B	B	A	A	A	B	A	B
Marker2043640	B	B	A	A	H	B	B	A	B	B	B	B	B	B	B	B	B	A	B	A	B	B	B	B	A	A	A	B	A	B	B	A	B	B	A	A	H	A	A	B	A	B	B	A	A	A	B	A	B
Marker2028791	B	B	A	A	H	B	B	A	B	B	B	B	B	B	B	B	B	A	B	A	B	B	B	B	A	A	A	B	A	B	B	A	B	B	A	A	H	A	A	B	A	B	B	A	A	A	B	A	B
Marker2034815	B	B	A	A	H	B	B	A	B	B	B	B	B	B	B	B	B	A	B	A	B	B	B	B	A	A	A	B	X	B	B	A	B	B	A	A	B	A	A	B	A	B	B	A	A	A	B	A	B
Marker1996299	B	B	A	A	A	B	B	A	B	B	B	B	B	B	B	B	B	A	B	A	B	B	B	B	A	A	A	B	B	B	B	A	B	B	A	A	B	A	A	B	A	B	B	A	A	A	B	A	B
Marker1999341	B	B	A	A	A	B	B	A	B	B	B	B	B	B	B	B	B	A	B	A	B	B	B	B	A	A	A	B	X	B	B	A	X	B	A	A	B	A	A	B	A	B	B	A	A	A	B	A	B
Marker1993465	B	B	A	A	H	B	B	A	B	B	B	B	B	B	B	B	B	A	B	A	B	B	B	B	A	A	A	B	X	B	B	A	X	B	A	A	B	A	A	B	A	B	B	A	A	A	B	A	B
Marker2026331	B	B	A	A	X	B	B	A	B	B	B	B	B	B	B	B	B	A	B	A	B	B	B	B	A	A	A	B	X	B	B	A	X	B	A	A	B	A	A	B	A	B	B	A	A	A	B	A	B
Marker2072680	B	B	A	A	A	B	B	A	B	B	B	B	B	B	B	B	B	A	B	A	B	B	B	B	A	A	A	B	A	B	B	A	B	B	A	A	H	A	A	B	A	B	B	A	A	A	B	A	B
Marker2074464	B	B	A	A	A	B	B	A	B	B	B	B	B	B	B	B	B	A	B	A	B	B	B	B	A	A	A	B	A	B	B	A	B	B	A	A	H	A	A	B	A	B	B	A	A	A	B	A	B
Marker2080020	B	B	A	A	A	B	B	A	B	B	B	B	B	B	B	B	B	A	B	A	B	B	B	B	A	A	A	B	A	B	B	A	B	B	A	A	H	A	A	B	A	B	B	A	A	A	B	A	B
Marker2048217	B	B	A	A	A	B	B	A	B	B	B	B	B	B	B	B	B	A	B	A	B	B	B	B	A	A	A	B	A	B	B	A	B	B	A	A	H	A	A	B	A	B	B	A	A	A	B	A	B
Marker2039498	B	B	A	A	A	B	B	A	B	B	B	B	B	B	B	B	B	A	B	A	B	B	B	B	A	A	A	B	A	B	B	A	B	B	A	A	B	A	A	B	A	B	B	A	A	A	B	A	B
Marker2041073	B	B	A	A	A	B	B	A	B	B	B	B	B	B	B	B	B	A	B	A	B	B	B	B	A	A	A	B	A	B	B	A	X	B	A	A	B	A	A	B	A	B	B	A	A	A	B	A	B
Marker2009650	B	B	A	A	X	B	B	A	B	B	B	B	B	B	B	B	B	A	B	A	B	B	B	B	A	A	A	B	X	B	B	A	B	B	A	A	B	A	A	B	A	B	B	A	A	A	B	A	B
Marker2063571	B	B	A	A	A	B	B	A	B	B	B	B	B	B	B	B	B	A	B	A	B	B	B	B	A	A	A	B	X	B	B	A	B	B	A	A	B	A	A	B	A	B	B	A	A	A	B	A	B
Marker2063212	B	B	A	A	A	B	B	A	B	B	B	B	B	B	B	B	B	A	B	A	B	B	B	B	A	A	A	B	B	B	B	A	B	B	A	A	B	A	A	B	A	B	B	A	A	A	B	A	B
Marker2037420	B	B	A	A	A	B	B	A	B	B	B	B	B	B	B	B	B	A	B	A	B	B	B	B	A	A	A	B	X	B	B	A	B	B	A	A	B	A	A	B	A	B	B	A	A	A	B	A	B
Marker2045071	B	B	A	A	A	B	B	A	B	B	B	B	B	B	B	B	B	A	B	A	B	B	B	B	A	A	A	B	B	B	B	A	B	B	A	A	B	A	A	B	A	B	B	A	A	A	B	A	B
Marker2067818	B	B	A	A	A	B	B	A	B	B	B	B	B	B	B	B	B	A	B	A	B	B	B	B	A	A	A	B	B	B	B	A	B	B	A	A	H	A	A	B	A	B	B	A	A	A	B	A	B
Marker2077834	B	B	A	A	A	B	B	A	B	B	B	B	B	B	B	B	B	A	B	A	B	B	B	B	A	A	A	B	B	B	B	A	B	B	A	A	B	A	A	B	A	B	B	A	A	A	B	A	B
Marker2023950	B	B	A	A	A	B	B	A	B	B	B	B	B	B	B	B	B	A	B	A	B	B	B	B	A	A	A	B	B	B	B	A	B	B	A	A	B	A	A	B	A	B	B	A	A	A	B	A	B
Marker2004074	B	B	A	A	A	B	B	A	B	B	B	B	B	B	B	B	B	A	B	A	B	B	B	B	A	A	A	B	X	B	B	A	B	B	A	A	B	A	A	B	A	B	B	A	A	A	B	A	B
Marker2020437	B	B	A	A	A	B	B	A	B	B	B	B	B	B	B	B	B	A	B	A	B	B	B	B	A	A	A	B	A	B	B	A	B	B	A	A	B	A	A	B	A	B	B	A	A	A	B	A	B
Marker2008546	B	B	A	A	A	B	B	A	B	B	B	B	B	B	B	B	B	A	B	A	B	B	B	B	A	A	A	B	A	B	B	A	B	B	A	A	B	A	A	B	A	B	B	A	A	A	B	A	B
Marker2070348	B	B	A	A	A	B	B	A	B	B	B	B	B	B	B	B	B	A	B	A	B	B	B	B	A	A	A	B	A	B	B	A	B	B	A	A	B	A	A	B	A	B	B	A	A	A	B	A	B
Marker1994401	B	B	A	A	A	B	B	A	B	B	B	B	B	B	B	B	B	A	B	A	B	B	B	B	A	A	A	B	A	B	B	A	B	B	A	A	B	A	A	B	A	B	B	A	A	A	B	A	B
Marker2021942	B	B	A	A	A	B	B	A	B	B	B	B	B	B	B	B	B	A	B	A	B	B	B	B	A	A	A	B	A	B	B	A	B	B	A	A	H	A	A	B	A	B	B	A	A	A	B	A	B
Marker1994713	B	B	A	A	A	B	B	A	B	B	B	B	B	B	B	B	B	A	B	A	B	B	B	B	A	A	A	B	X	B	B	A	B	B	A	A	H	A	A	B	A	B	B	A	A	A	B	A	B
Marker2054122	B	B	A	A	H	B	B	A	B	B	B	B	B	B	B	B	B	A	B	A	B	B	B	B	A	A	A	B	A	B	B	A	B	B	A	A	H	A	A	B	A	B	B	A	A	A	B	A	B
Marker2071485	B	B	A	A	A	B	B	A	B	B	B	B	B	B	B	B	B	A	B	A	B	B	B	B	A	A	A	B	A	B	B	A	B	B	A	A	B	A	A	B	A	B	B	A	A	A	B	A	H
Marker2061835	B	B	A	A	A	B	B	A	B	B	B	B	B	B	B	B	B	A	B	A	B	B	B	B	A	A	A	B	A	B	B	A	B	B	A	A	B	A	A	B	A	B	B	A	A	A	B	A	H
Marker2043929	B	B	A	A	A	B	B	A	B	B	B	B	B	B	B	B	B	A	B	A	B	B	B	B	A	A	A	B	A	B	B	A	B	B	A	A	H	A	A	B	A	B	B	A	A	A	B	A	H
Marker1989883	B	B	A	A	A	B	B	A	B	B	B	B	B	B	B	B	B	A	B	A	B	B	B	B	A	A	A	B	X	B	B	A	B	B	A	A	B	A	A	B	A	B	B	A	A	A	B	A	X
Marker1998732	B	B	A	A	A	B	B	A	B	B	B	B	B	B	B	B	B	A	B	A	B	B	B	B	A	A	A	B	B	B	B	A	B	B	A	A	B	A	A	B	A	B	B	A	A	A	B	A	B
Marker2010031	B	B	A	A	A	B	B	A	B	B	B	B	B	B	B	B	B	A	B	A	B	B	B	B	A	A	A	B	B	B	B	A	B	B	A	A	B	A	A	B	A	B	B	A	A	A	B	A	B
Marker2008463	B	B	A	A	A	B	B	A	B	B	B	B	B	B	B	B	B	A	B	A	B	B	B	B	A	A	A	B	B	B	B	A	B	B	A	A	B	A	A	B	A	B	B	A	A	A	B	A	B
Marker2068549	B	B	A	A	A	B	B	A	B	B	B	B	B	B	B	B	B	A	B	A	B	B	B	B	A	A	A	B	B	B	B	A	B	B	A	A	B	A	A	B	A	B	B	A	A	A	B	A	B
Marker2010899	B	B	A	A	A	B	B	A	B	B	B	B	B	B	B	B	B	A	B	A	B	B	B	B	A	A	A	B	B	B	B	A	B	B	A	A	H	A	A	B	A	B	B	A	A	A	B	A	B
Marker2052177	B	B	A	A	A	B	B	A	B	B	B	B	B	B	B	B	B	A	B	A	B	B	B	B	A	A	A	B	A	B	B	A	B	B	A	A	H	A	A	B	A	B	B	A	A	A	B	A	B
Marker1997792	B	B	A	A	X	B	B	A	B	B	B	B	B	B	B	B	B	A	B	A	B	B	B	B	A	A	A	B	X	B	B	A	B	B	A	A	H	A	A	B	A	B	B	A	A	A	B	A	B
Marker2021366	B	B	A	A	A	B	B	A	B	B	B	B	B	B	B	B	B	A	B	A	B	B	B	B	A	A	A	B	A	B	B	A	B	B	A	A	B	A	A	B	A	B	B	A	A	A	B	A	B
Marker2027457	B	B	A	A	H	B	B	A	B	B	B	B	B	B	B	B	B	A	B	A	B	B	B	B	A	A	A	B	A	B	B	A	B	B	A	A	B	A	A	B	A	B	B	A	A	A	B	A	B
Marker2021118	B	B	A	A	H	B	B	A	B	B	B	B	B	B	B	B	B	A	B	A	B	B	B	B	A	A	A	B	A	B	B	A	B	B	A	A	B	A	A	B	A	B	B	A	A	A	B	A	B
Marker2002065	B	B	A	A	H	B	B	A	B	B	B	B	B	B	B	B	B	A	B	A	B	B	B	B	A	A	A	B	A	B	B	A	B	B	A	A	B	A	A	B	A	B	B	A	A	A	B	A	B
Marker1989411	B	B	A	A	H	B	B	A	B	B	B	B	B	B	B	B	B	A	B	A	B	B	B	B	A	A	A	B	A	B	B	A	B	B	A	A	H	A	A	B	A	B	B	A	A	A	B	A	B
Marker2058133	B	B	A	A	H	B	B	A	B	B	B	B	B	B	B	B	B	A	B	A	B	B	B	B	A	A	A	B	A	B	B	A	B	B	A	A	H	A	A	B	A	B	B	A	A	A	B	A	B
Marker2025136	B	B	A	A	A	B	B	A	B	B	B	B	B	B	B	B	B	A	B	A	B	B	B	B	A	A	A	B	A	B	B	A	B	B	A	A	H	A	A	B	A	B	B	A	A	A	B	A	B
Marker2036312	B	B	A	A	A	B	B	A	B	B	B	B	B	B	B	B	B	A	B	A	B	B	B	B	A	A	A	B	A	B	B	A	B	B	A	A	H	A	A	B	A	B	B	A	A	A	B	A	B
Marker2040968	B	B	A	A	H	B	B	A	B	B	B	B	B	B	B	B	B	A	B	A	B	B	B	B	A	A	A	B	A	B	B	A	B	B	A	A	H	A	A	B	A	B	B	A	A	A	B	A	B
Marker2069545	B	B	A	A	H	B	B	A	B	B	B	B	B	B	B	B	B	A	B	A	B	B	B	B	A	A	A	B	A	B	B	A	B	B	A	A	H	A	A	B	A	B	B	A	A	A	B	A	B
Marker2058077	B	B	A	A	X	B	B	A	B	B	B	B	B	B	B	B	B	A	B	A	B	B	B	B	A	A	A	B	X	B	B	A	B	B	A	A	H	A	A	B	A	B	B	A	A	A	B	A	B
Marker2084879	B	B	A	A	X	B	B	A	B	B	B	B	B	B	B	B	B	A	B	A	B	B	B	B	A	A	A	B	X	B	B	A	B	B	A	A	H	A	A	B	A	B	B	A	A	A	B	A	B
Marker2015646	B	B	A	A	A	B	B	A	B	B	B	B	B	B	B	B	B	A	B	A	B	B	B	B	A	A	A	B	B	B	B	A	B	B	A	A	H	A	A	B	A	B	B	A	A	A	B	A	B
Marker2033026	B	B	A	A	X	B	B	A	B	B	B	B	B	B	B	B	B	A	B	A	B	B	B	B	A	A	A	B	X	B	B	A	B	B	A	A	B	A	A	B	A	B	B	A	A	A	B	A	B
Marker2057246	B	B	A	A	H	B	B	A	B	B	B	B	B	B	B	B	B	A	B	A	B	B	B	B	A	A	A	B	A	B	B	A	B	B	A	A	H	A	A	B	A	B	B	A	A	A	B	A	B
Marker2059364	B	B	A	A	X	B	B	A	B	B	B	B	B	B	B	B	B	A	B	A	B	B	B	B	A	A	A	B	X	B	B	A	X	B	A	A	B	A	A	B	A	B	B	A	A	A	B	A	B
Marker1988460	B	B	A	A	H	B	B	A	B	B	B	B	B	B	B	B	B	A	B	A	B	B	B	B	A	A	A	B	A	B	B	A	B	B	A	A	H	A	A	B	A	B	B	A	A	A	B	A	B
Marker2043356	B	B	A	A	A	B	B	A	B	B	B	B	B	B	B	B	B	A	B	A	B	B	B	B	A	A	A	B	X	B	B	A	X	B	A	A	B	A	A	B	A	B	B	A	A	A	B	A	B
Marker2031253	B	B	A	A	H	B	B	A	B	B	B	B	B	B	B	B	B	A	B	A	B	B	B	B	A	A	A	B	A	B	B	A	B	B	A	A	H	A	A	B	A	B	B	A	A	A	B	A	B
Marker2005178	B	B	A	A	H	B	B	A	B	B	B	B	B	B	B	B	B	A	B	A	B	B	B	B	A	A	A	B	A	B	B	A	B	B	A	A	H	A	A	B	A	B	B	A	A	A	B	A	B
Marker2033096	B	B	A	A	H	B	B	A	B	B	B	B	B	B	B	B	B	A	B	A	B	B	B	B	A	A	A	B	X	B	B	A	B	B	A	A	B	A	A	B	A	B	B	A	A	A	B	A	B
Marker2028958	B	B	A	A	H	B	B	A	B	B	B	B	B	B	B	B	B	A	B	A	B	B	B	B	A	A	A	B	B	B	B	A	B	B	A	A	B	A	A	B	A	B	B	A	A	A	B	A	B
Marker1994789	B	B	A	A	H	B	B	A	B	B	B	B	B	B	B	B	B	A	B	A	B	B	B	B	A	A	A	B	B	B	B	A	B	B	A	A	B	A	A	B	A	B	B	A	A	A	B	A	B
Marker2025049	B	B	A	A	H	B	B	A	B	B	B	B	B	B	B	B	B	A	B	A	B	B	B	B	A	A	A	B	A	B	B	A	B	B	A	A	B	A	A	B	A	B	B	A	A	A	B	A	B
Marker2058310	B	B	A	A	X	B	B	A	B	B	B	B	B	B	B	B	B	A	B	A	B	B	B	B	A	A	A	B	A	B	B	A	B	B	A	A	B	A	A	B	A	B	B	A	A	A	B	A	B
Marker2065479	B	B	A	A	H	B	B	A	B	B	B	B	B	B	B	B	B	A	B	A	B	B	B	B	A	A	A	B	X	B	B	A	B	B	A	A	B	A	A	B	A	B	B	A	A	A	B	A	B
Marker2045027	B	B	A	A	X	B	B	A	B	B	B	B	B	B	B	B	B	A	B	A	B	B	B	B	A	A	A	B	X	B	B	A	B	B	A	A	B	A	A	B	A	B	B	A	A	A	B	A	B
Marker2086879	B	B	A	A	A	B	B	A	B	B	B	B	B	B	B	B	B	A	B	A	B	B	B	B	A	A	A	B	A	B	B	A	B	B	A	A	B	A	A	B	A	B	B	A	A	A	B	A	B
Marker2080480	B	B	A	A	H	B	B	A	B	B	B	B	B	B	B	B	B	A	B	A	B	B	B	B	A	A	A	B	A	B	B	A	B	B	A	A	B	A	A	B	A	B	B	A	A	A	B	A	B
Marker2022295	B	B	A	A	H	B	B	A	B	B	B	B	B	B	B	B	B	A	B	A	B	B	B	B	A	A	A	B	A	B	B	A	B	B	A	A	B	A	A	B	A	B	B	A	A	A	B	A	B
Marker2032568	B	B	A	A	X	B	B	A	B	B	B	B	B	B	B	B	B	A	B	A	B	B	B	B	A	A	A	B	X	B	B	A	B	B	A	A	H	A	A	B	A	B	B	A	A	A	B	A	B
Marker2016889	B	B	A	A	X	B	B	A	B	B	B	B	B	B	B	B	B	A	B	A	B	B	B	B	A	A	A	B	A	B	B	A	B	B	A	A	H	A	A	B	A	B	B	A	A	A	B	A	B
Marker2030669	B	B	A	A	H	B	B	A	B	B	B	B	B	B	B	B	B	A	B	A	B	B	B	B	A	A	A	B	A	B	B	A	B	B	A	A	B	A	A	B	A	B	B	A	A	A	B	A	B
Marker1998962	B	B	A	A	H	B	B	A	B	B	B	B	B	B	B	B	B	A	B	A	B	B	B	B	A	A	A	B	B	B	B	A	B	B	A	A	H	A	A	B	A	B	B	A	A	A	B	A	B
Marker2057402	B	B	A	A	H	B	B	A	B	B	B	B	B	B	B	B	B	A	B	A	B	B	B	B	A	A	A	B	B	B	B	A	B	B	A	A	H	A	A	B	A	B	B	A	A	A	B	A	B
Marker2014733	B	B	A	A	A	B	B	A	B	B	B	B	B	B	B	B	B	A	B	A	B	B	B	B	A	A	A	B	B	B	B	A	B	B	A	A	H	A	A	B	A	B	B	A	A	A	B	A	B
Marker2072358	B	B	A	A	A	B	B	A	B	B	B	B	B	B	B	B	B	A	B	A	B	B	B	B	A	A	A	B	X	B	B	A	B	B	A	A	H	A	A	B	A	B	B	A	A	A	B	A	H
Marker1989138	B	B	A	A	A	B	B	A	B	B	B	B	B	B	B	B	B	A	B	A	B	B	B	B	A	A	A	B	B	B	B	A	B	B	A	A	H	A	A	B	A	B	B	A	A	A	B	A	H
Marker2025041	B	B	A	A	A	B	B	A	B	B	B	B	B	B	B	B	B	A	B	A	B	B	B	B	A	A	A	B	B	B	B	A	B	B	A	A	H	A	A	B	A	B	B	A	A	A	B	A	H
Marker2010349	B	B	A	A	A	B	B	A	B	B	B	B	B	B	B	B	B	A	B	A	B	B	B	B	A	A	A	B	X	B	B	A	B	B	A	A	B	A	A	B	A	B	B	A	A	A	B	A	H
Marker2016886	B	B	A	A	A	B	B	A	B	B	B	B	B	B	B	B	B	A	B	A	B	B	B	B	A	A	A	B	A	B	B	A	B	B	A	A	B	A	A	B	A	B	B	A	A	A	B	A	H
Marker2032253	B	B	A	A	A	B	B	A	B	B	B	B	B	B	B	B	B	A	B	A	B	B	B	B	A	A	A	B	A	B	B	A	B	B	A	A	B	A	A	B	A	B	B	A	A	A	B	A	H
Marker2038466	B	B	A	A	A	B	B	A	B	B	B	B	B	B	B	B	B	A	B	A	B	B	B	B	A	A	A	B	A	B	B	A	B	B	A	A	B	A	A	B	A	B	B	A	A	A	B	A	H
Marker2054109	B	B	A	A	A	B	B	A	B	B	B	B	B	B	B	B	B	A	B	A	B	B	B	B	A	A	A	B	A	B	B	A	B	B	A	A	B	A	A	B	A	B	B	A	A	A	B	A	H
Marker2046643	B	B	A	A	A	B	B	A	B	B	B	B	B	B	B	B	B	A	B	A	B	B	B	B	A	A	A	B	A	B	B	A	B	B	A	A	B	A	A	B	A	B	B	A	A	A	B	A	B
Marker2046259	B	B	A	A	A	B	B	A	B	B	B	B	B	B	B	B	B	A	B	A	B	B	B	B	A	A	A	B	X	B	B	A	B	B	A	A	B	A	A	B	A	B	B	A	A	A	B	A	B
Marker2072590	B	B	A	A	A	B	B	A	B	B	B	B	B	B	B	B	B	A	B	A	B	B	B	B	A	A	A	B	X	B	B	A	B	B	A	A	H	A	A	B	A	B	B	A	A	A	B	A	B
Marker2007753	B	B	A	A	X	B	B	A	B	B	B	B	B	B	B	B	B	A	B	A	B	B	B	B	A	A	A	B	X	B	B	A	B	B	A	A	B	A	A	B	A	B	B	A	A	A	B	A	B
Marker2034938	B	B	A	A	A	B	B	A	B	B	B	B	B	B	B	B	B	A	B	A	B	B	B	B	A	A	A	B	A	B	B	A	B	B	A	A	B	A	A	B	A	B	B	A	A	A	B	A	B
Marker2000630	B	B	A	A	A	B	B	A	B	B	B	B	B	B	B	B	B	A	B	A	B	B	B	B	A	A	A	B	X	B	B	A	B	B	A	A	B	A	A	B	A	B	B	A	A	A	B	A	B
Marker2007866	B	B	A	A	X	B	B	A	B	B	B	B	B	B	B	B	B	A	B	A	B	B	B	B	A	A	A	B	B	B	B	A	B	B	A	A	B	A	A	B	A	B	B	A	A	A	B	A	B
Marker2004761	B	B	A	A	H	B	B	A	B	B	B	B	B	B	B	B	B	A	B	A	B	B	B	B	A	A	A	B	B	B	B	A	B	B	A	A	B	A	A	B	A	B	B	A	A	A	B	A	B
Marker2022008	B	B	A	A	H	B	B	A	B	B	B	B	B	B	B	B	B	A	B	A	B	B	B	B	A	A	A	B	X	B	B	A	B	B	A	A	B	A	A	B	A	B	B	A	A	A	B	A	H
Marker2083860	B	B	A	A	H	B	B	A	B	B	B	B	B	B	B	B	B	A	B	A	B	B	B	B	A	A	A	B	A	B	B	A	B	B	A	A	B	A	A	B	A	B	B	A	A	A	B	A	H
Marker2020587	B	B	A	A	H	B	B	A	B	B	B	B	B	B	B	B	B	A	B	A	B	B	B	B	A	A	A	B	A	B	B	A	B	B	A	A	B	A	A	B	A	B	B	A	A	A	B	A	H
Marker2014049	B	B	A	A	H	B	B	A	B	B	B	B	B	B	B	B	B	A	B	A	B	B	B	B	A	A	A	B	A	B	B	A	B	B	A	A	B	A	A	B	A	B	B	A	A	A	B	A	X
Marker2073483	B	B	A	A	H	B	B	A	B	B	B	B	B	B	B	B	B	A	B	A	B	B	B	B	A	A	A	B	A	B	B	A	B	B	A	A	B	A	A	B	A	B	B	A	A	A	B	A	B
Marker2061284	B	B	A	A	H	B	B	A	B	B	B	B	B	B	B	B	B	A	B	A	B	B	B	B	A	A	A	B	A	B	B	A	B	B	A	A	B	A	A	B	A	B	B	A	A	A	B	A	B
Marker2034549	B	B	A	A	H	B	B	A	B	B	B	B	B	B	B	B	B	A	B	A	B	B	B	B	A	A	A	B	X	B	B	A	B	B	A	A	B	A	A	B	A	B	B	A	A	A	B	A	B
Marker1997280	B	B	A	A	A	B	B	A	B	B	B	B	B	B	B	B	B	A	B	A	B	B	B	B	A	A	A	B	B	B	B	A	B	B	A	A	B	A	A	B	A	B	B	A	A	A	B	A	B
Marker2063982	B	B	A	A	A	B	B	A	B	B	B	B	B	B	B	B	B	A	B	A	B	B	B	B	A	A	A	B	X	B	B	A	B	B	A	A	B	A	A	B	A	B	B	A	A	A	B	A	B
Marker2082156	B	B	A	A	X	B	B	A	B	B	B	B	B	B	B	B	B	A	B	A	B	B	B	B	A	A	A	B	X	B	B	A	B	B	A	A	B	A	A	B	A	B	B	A	A	A	B	A	X
Marker2084370	B	B	A	A	A	B	B	A	B	B	B	B	B	B	B	B	B	A	B	A	B	B	B	B	A	A	A	B	A	B	B	A	B	B	A	A	B	A	A	B	A	B	B	A	A	A	B	X	B
Marker1993658	B	B	A	A	A	B	B	A	B	B	B	B	B	B	B	B	B	A	B	A	B	B	B	B	A	A	A	B	A	B	B	A	B	B	A	A	B	A	A	B	A	B	B	A	A	A	B	B	B
Marker2068648	B	B	A	A	A	B	B	A	B	B	B	B	B	B	B	B	B	A	B	A	B	B	B	B	A	A	A	B	X	B	B	A	B	B	A	A	B	A	A	B	A	B	B	A	A	A	B	B	B
Marker2079415	B	B	A	A	A	B	B	A	B	B	B	B	B	B	B	B	B	A	B	A	B	B	B	B	A	A	A	B	A	B	B	A	B	B	A	A	B	A	A	B	A	B	B	A	A	A	B	B	H
Marker2070989	B	B	A	A	A	B	B	A	B	B	B	B	B	B	B	B	B	A	B	A	B	B	B	B	A	A	A	B	A	B	B	A	X	B	A	A	B	A	A	B	A	B	B	A	A	A	B	B	H
Marker2064709	B	B	A	A	A	B	B	A	B	B	B	B	B	B	B	B	B	A	B	A	B	B	B	B	A	A	A	B	X	B	B	A	B	B	A	A	B	A	A	B	A	B	B	A	A	A	B	B	B
Marker2074752	B	B	A	A	A	B	B	A	B	B	B	B	B	B	B	B	B	A	B	A	B	B	B	B	A	A	A	B	B	B	B	A	X	B	A	A	B	A	A	B	A	B	B	A	A	A	B	B	B
Marker2017007	B	B	A	A	A	B	B	A	B	B	B	B	B	B	B	B	B	A	B	A	B	B	B	B	A	A	A	B	B	B	B	A	X	B	A	A	B	A	A	B	A	B	B	A	A	A	B	B	X
Marker2036913	B	B	A	A	A	B	X	A	B	B	B	B	B	B	B	A	B	X	B	A	B	B	B	B	A	A	A	B	B	B	B	A	X	B	A	A	B	A	A	B	A	B	B	A	A	A	B	B	B
Marker2079043	B	B	A	A	A	B	X	A	B	B	B	B	B	B	B	A	B	X	B	A	B	B	B	B	A	A	A	B	X	B	B	A	X	B	A	A	B	A	A	B	A	B	B	A	A	A	B	B	B
Marker1994150	B	B	A	A	A	B	X	A	B	B	B	B	B	B	B	A	B	X	B	A	B	B	B	B	A	A	A	B	B	B	B	A	X	B	A	A	B	A	A	B	A	B	B	A	A	A	B	B	B
Marker2036120	B	B	A	A	A	B	B	A	B	B	B	B	B	B	B	A	B	A	B	A	B	B	B	B	A	A	A	B	X	B	B	A	B	B	A	A	B	A	A	B	A	B	B	A	A	A	B	B	B
Marker2002060	B	B	A	A	A	B	X	A	B	B	B	B	B	B	B	A	B	A	B	A	B	B	B	B	A	A	A	B	X	B	B	A	X	B	A	A	B	A	A	B	A	B	B	A	A	A	B	B	B
Marker2001532	B	B	A	A	A	B	B	A	B	B	B	B	B	B	B	A	B	X	B	A	B	B	B	B	A	A	A	B	B	B	B	A	B	B	A	A	B	A	A	B	A	B	B	A	A	A	B	B	B
Marker2060864	B	B	A	A	A	B	B	A	B	B	B	B	B	B	B	A	B	A	B	A	B	B	B	B	A	A	A	B	B	B	B	A	B	B	A	A	B	A	A	B	A	B	B	A	A	A	B	B	B
Marker2055314	B	B	A	A	A	B	B	A	B	B	B	B	B	B	B	A	B	A	B	A	B	B	B	B	A	A	A	B	B	B	B	A	B	B	A	A	B	A	A	B	A	B	B	A	A	A	B	B	B
Marker2010360	B	B	A	A	A	B	B	A	B	B	B	B	B	B	B	A	B	A	B	A	B	B	B	B	A	A	A	B	A	B	B	A	B	B	A	A	B	A	A	B	A	B	B	A	A	A	B	B	B
Marker2065353	B	B	A	A	A	B	X	A	B	B	B	B	B	B	B	A	B	A	B	A	B	B	B	B	A	A	A	B	A	B	B	A	X	B	A	A	B	A	A	B	A	B	B	A	A	A	B	B	B
Marker2064029	B	B	A	A	A	B	B	A	B	B	B	B	B	B	B	A	B	A	B	A	B	B	B	B	A	A	A	B	A	B	B	A	B	B	A	A	B	A	A	B	A	B	B	A	A	A	B	B	B
Marker2037265	B	B	A	A	A	B	B	A	B	B	B	B	B	B	B	A	B	A	B	A	B	B	B	B	A	A	A	B	X	B	B	A	B	B	A	A	B	A	A	B	A	B	B	A	A	A	B	B	B
Marker2057277	B	B	A	A	A	B	X	A	B	B	B	B	B	B	B	A	B	A	B	A	B	B	B	B	A	A	A	B	A	B	B	A	B	B	A	A	B	A	X	B	A	B	B	A	A	A	B	B	B
Marker2027540	B	B	A	A	A	B	B	A	B	B	B	B	B	A	B	A	B	A	B	X	B	B	X	A	A	A	A	B	X	B	B	A	B	X	X	A	B	A	B	B	A	B	B	A	A	A	B	B	B
Marker2084899	B	B	A	A	A	B	X	A	B	A	B	B	B	A	B	A	B	A	A	A	B	B	X	A	A	A	A	B	X	B	A	A	X	B	B	A	X	A	B	B	A	B	B	A	B	A	B	B	A
Marker2056743	B	B	A	A	A	B	B	A	B	A	B	B	B	A	B	A	B	A	A	A	B	B	A	A	A	A	A	B	A	B	A	A	B	B	B	A	B	A	B	B	A	B	B	A	B	A	B	B	A
Marker2017706	B	B	B	A	A	B	B	A	B	A	B	B	B	A	B	A	B	A	A	A	B	B	A	A	A	A	A	X	A	B	A	A	X	H	B	A	B	A	B	B	A	B	B	A	B	A	B	B	A
Marker2082192	B	B	A	A	A	B	B	A	B	A	X	B	B	A	B	A	B	A	A	A	X	B	A	A	A	A	A	B	A	B	A	A	X	X	B	A	B	A	B	B	A	B	B	A	B	A	B	B	A
Marker1992185	B	B	B	A	A	B	B	A	B	A	X	B	B	A	B	A	B	A	A	B	X	B	A	A	A	A	A	B	X	B	B	A	X	H	B	A	A	B	B	B	A	B	B	A	B	A	B	B	A
Marker2019280	B	B	B	A	A	B	B	A	B	A	B	B	B	A	B	A	B	A	A	B	B	B	A	A	A	A	A	B	A	B	A	A	X	H	B	A	A	B	B	B	A	B	B	A	B	A	B	B	A
Marker2030021	B	B	B	A	A	B	B	A	B	A	B	B	B	A	B	A	B	A	A	B	B	B	A	A	A	A	A	X	A	B	B	A	B	H	B	A	A	B	B	B	A	B	B	A	B	A	B	B	A
Marker2079779	B	B	B	A	A	B	B	A	B	A	B	B	B	A	B	A	B	A	A	B	B	B	A	A	A	A	A	B	A	B	B	A	B	B	B	A	A	B	B	B	A	B	B	A	B	A	B	B	A
Marker2054185	B	B	B	A	A	B	B	A	B	A	A	B	B	X	B	A	B	A	A	B	A	B	A	A	X	A	A	A	A	B	B	A	X	B	B	A	A	B	B	B	A	B	B	A	A	A	B	B	A
Marker2082598	B	B	B	A	A	B	B	A	B	A	A	B	B	B	B	A	X	A	A	B	A	B	A	A	A	A	A	A	A	B	B	A	B	B	B	A	A	B	B	B	A	B	B	A	A	A	B	B	A
Marker2083406	B	B	B	A	A	B	B	A	B	A	A	B	B	B	B	A	B	A	A	B	A	B	A	A	A	A	A	A	A	B	B	A	B	B	B	A	A	B	B	B	A	B	B	A	A	A	B	B	A
Marker2003513	B	B	B	A	A	B	B	A	B	A	A	B	B	B	B	A	B	A	A	B	A	B	A	A	A	A	A	A	X	B	B	A	B	B	B	A	A	B	B	B	A	B	B	A	A	A	B	B	A
Marker2060091	B	B	B	A	A	B	B	A	B	A	A	B	B	B	B	X	B	A	A	B	A	B	A	A	X	A	A	A	X	B	B	A	B	B	B	A	A	B	B	A	A	B	B	A	A	A	B	B	A
Marker2027932	B	B	B	A	A	B	B	A	B	A	A	B	B	B	B	A	A	A	A	B	A	B	A	A	B	A	A	A	X	B	B	A	B	B	B	A	A	B	B	A	X	B	B	A	A	A	B	B	A
Marker2010659	A	A	B	A	A	B	B	A	B	A	A	B	X	B	B	B	A	A	A	A	A	B	A	A	X	A	B	A	A	A	B	A	A	B	B	A	X	B	B	A	X	B	B	A	A	A	B	X	A
Marker2078335	A	A	B	A	A	B	B	A	B	A	A	B	X	B	B	B	A	A	A	A	A	B	A	A	B	A	B	A	A	A	B	A	X	B	B	A	B	B	B	A	B	H	B	A	A	A	B	A	A
Marker2027916	A	A	B	A	A	B	B	A	B	A	A	B	X	B	B	B	A	A	A	A	A	B	A	A	B	A	B	A	A	A	B	A	A	B	B	A	B	B	B	A	B	H	B	A	A	A	B	A	A
Marker2002828	A	A	B	A	A	B	B	A	B	A	A	B	X	B	B	B	A	A	A	A	A	B	A	A	B	A	B	A	X	A	B	A	X	B	B	A	B	B	B	A	X	H	B	A	A	A	B	A	A
Marker2042695	X	A	B	A	X	B	B	A	B	X	A	B	B	B	B	B	A	A	A	A	A	B	A	A	B	A	B	A	X	B	B	A	A	B	B	B	B	B	B	A	B	A	B	A	A	A	B	A	A
Marker2021191	A	A	B	A	A	B	B	A	B	B	A	B	B	B	B	B	A	A	A	A	A	B	A	A	B	A	B	A	A	X	B	A	A	B	B	B	B	B	B	A	B	A	B	A	A	A	B	A	A
Marker2006823	A	A	B	A	X	B	B	A	B	B	A	B	B	B	X	B	A	A	A	A	A	B	A	A	B	A	B	A	X	X	B	A	A	B	B	B	B	B	B	A	B	A	B	A	A	A	B	A	A
Marker2084172	A	A	B	A	A	B	B	X	B	B	A	B	B	B	B	B	A	A	A	A	A	B	A	A	X	A	B	A	A	B	B	A	A	B	B	B	B	B	B	A	B	H	B	A	A	A	B	A	A
Marker2080954	A	A	B	A	X	B	B	X	B	X	A	B	B	B	B	B	A	A	A	A	A	B	A	A	B	A	B	A	X	B	B	A	A	B	B	X	B	B	B	A	B	B	B	A	A	A	B	A	X
Marker2006616	A	A	B	A	A	B	B	X	B	B	A	B	X	B	X	B	A	A	A	A	A	B	A	A	X	A	B	A	B	B	B	A	A	B	B	B	B	B	B	A	B	B	B	A	A	A	B	A	X
Marker2029290	A	A	B	A	X	B	B	X	B	B	A	B	B	B	X	B	A	A	A	A	A	B	A	A	B	A	B	A	B	B	B	A	A	B	B	B	B	B	B	A	B	B	B	A	A	A	B	A	X
Marker2016894	A	A	B	A	X	B	B	A	B	B	A	B	B	B	X	B	A	A	A	A	A	B	A	A	X	A	B	A	X	B	B	A	A	B	B	B	B	B	B	A	B	H	B	A	A	A	B	A	X
Marker2081492	A	A	B	A	A	B	B	A	B	B	X	B	B	B	X	B	A	A	A	A	A	B	A	A	X	A	B	A	X	B	B	A	A	B	B	B	B	B	B	A	B	A	B	A	A	A	B	A	A
Marker2041871	A	A	B	A	A	B	B	X	B	B	B	B	B	B	X	B	A	A	A	A	A	B	A	A	X	A	B	A	A	X	B	A	A	B	B	B	B	B	B	A	B	A	B	A	A	A	B	A	A
Marker2004718	A	A	B	A	A	B	B	X	B	B	B	B	B	B	B	B	A	A	A	A	A	B	A	A	X	A	B	A	X	B	B	A	A	B	B	B	B	B	B	A	B	H	B	A	A	A	B	A	A
Marker2038002	A	A	B	A	A	B	B	A	B	B	B	B	B	B	X	B	A	A	A	A	A	B	A	A	B	A	B	A	A	B	B	A	A	B	B	B	B	B	B	A	B	H	B	A	A	A	B	A	A
Marker2012694	A	A	B	A	A	B	B	A	B	B	B	B	B	B	X	B	A	A	A	A	A	B	A	A	B	A	B	A	A	X	B	A	A	B	B	B	B	B	B	A	B	A	B	A	A	A	B	A	A
Marker2056780	A	A	B	A	A	B	B	A	B	B	B	B	B	B	B	B	A	A	A	A	A	B	A	A	B	A	B	A	B	B	B	A	A	B	B	B	B	B	B	A	B	A	B	A	A	A	B	A	A
Marker2067935	A	A	B	A	A	B	B	A	B	B	B	B	B	B	B	B	A	A	A	A	B	B	A	A	B	A	B	A	B	B	B	A	A	B	B	B	B	B	B	A	B	A	B	A	A	A	B	A	A
Marker2038773	A	A	B	A	A	B	B	A	B	B	B	B	B	B	X	B	A	A	A	A	X	B	A	A	B	A	B	A	X	B	B	A	A	B	B	B	B	B	B	A	B	A	B	A	A	A	B	A	A
Marker2004620	A	A	B	A	A	B	B	A	B	B	B	B	B	B	B	B	A	A	A	A	B	B	A	A	X	A	B	A	A	X	B	A	A	B	B	B	B	B	B	A	B	A	B	A	A	A	B	A	A
Marker1993204	A	A	B	A	A	B	B	A	B	B	B	B	B	B	B	B	A	A	A	A	B	B	A	X	B	A	B	A	A	X	B	A	A	B	B	B	B	B	B	A	B	A	B	A	A	A	B	A	A
Marker2009408	A	A	B	A	A	B	B	A	B	B	B	B	B	B	B	B	A	A	A	A	B	B	A	A	B	A	B	A	A	B	B	A	A	B	B	B	B	B	B	A	B	A	B	A	A	A	B	A	A
Marker2000676	A	A	B	A	A	B	B	A	B	B	B	B	B	B	B	B	A	A	A	A	B	B	A	A	B	A	B	A	A	B	B	A	A	B	B	B	B	B	B	A	B	H	B	A	A	A	B	A	A
Marker1999205	A	A	B	A	A	B	B	A	B	B	B	B	B	B	B	B	A	A	A	A	B	B	A	A	B	A	B	A	B	X	B	A	A	B	B	B	B	B	B	A	B	H	B	A	A	A	B	A	A
Marker2024920	A	A	B	A	A	B	B	A	B	B	B	B	B	B	X	B	A	A	A	A	B	B	A	B	X	A	B	A	B	X	B	A	A	A	B	B	B	B	B	A	B	H	B	A	A	A	B	A	A
Marker2071312	A	A	B	A	A	B	B	A	B	B	B	B	B	B	B	B	A	A	A	A	B	B	A	B	B	A	B	A	X	B	X	A	A	A	B	B	B	B	B	A	B	H	B	A	A	A	B	A	A
Marker2033952	X	A	B	A	A	B	B	A	B	B	B	B	B	B	X	A	A	A	A	A	B	B	A	B	X	A	B	A	X	X	B	A	A	A	B	A	B	B	B	A	B	A	A	A	A	A	B	A	A
Marker2043330	A	A	B	A	A	B	B	A	B	B	B	B	B	B	A	A	A	A	A	A	B	B	A	B	B	A	B	A	A	B	B	A	A	A	B	A	B	B	B	A	B	H	A	A	A	A	B	A	A
Marker2049766	A	A	B	A	A	B	B	A	B	B	B	B	B	B	A	A	A	A	A	A	B	B	A	X	X	A	B	A	A	B	B	X	A	A	B	X	B	B	B	A	B	A	A	A	A	A	B	A	A
Marker2058741	A	A	B	A	A	B	B	A	B	B	B	B	B	B	A	A	A	A	A	A	B	B	A	B	X	A	B	A	X	B	A	A	A	X	B	A	B	B	B	A	B	A	A	A	A	A	B	X	A
Marker2003255	B	B	B	A	A	B	B	A	B	B	B	B	B	B	X	X	X	A	A	A	B	B	A	B	B	A	B	A	X	B	A	A	A	A	B	A	B	B	B	A	B	X	X	A	A	A	B	A	A
Marker2051957	B	B	B	A	A	B	B	A	B	B	B	B	B	B	X	A	A	A	A	A	B	B	A	B	B	A	B	A	A	X	A	A	A	A	B	A	B	B	B	A	B	H	A	A	A	A	B	A	A
Marker2051289	B	B	B	A	A	B	B	A	B	B	B	B	B	B	X	A	A	A	A	A	B	B	A	B	X	A	B	A	X	B	A	A	A	A	B	A	B	B	B	A	B	H	A	A	A	A	B	A	A
Marker2036165	B	B	B	A	A	B	B	A	B	B	B	B	B	B	A	A	A	A	A	A	B	B	A	B	B	A	B	A	A	B	A	A	A	A	B	A	B	B	B	A	B	H	A	A	A	A	B	A	A
Marker2086731	B	B	B	A	A	B	B	A	B	B	B	B	B	B	X	A	A	A	A	A	B	B	A	B	X	A	B	A	X	B	A	X	A	A	B	A	B	B	B	A	B	A	A	A	A	A	B	A	A
Marker1998116	B	B	B	A	A	B	B	A	B	B	B	B	B	B	A	A	B	A	A	A	B	B	A	B	X	A	B	A	A	X	A	B	A	A	B	A	B	B	B	A	B	A	A	A	A	A	B	B	B
Marker1997097	B	B	B	A	A	B	B	A	B	B	B	B	B	B	X	A	B	A	A	A	B	B	A	B	B	A	B	A	A	X	A	B	X	A	B	A	B	B	B	A	B	X	A	A	A	A	B	B	B
Marker2016610	B	B	B	A	A	B	B	A	B	B	B	B	B	B	A	A	X	A	A	A	B	B	A	B	X	A	B	A	A	B	A	B	X	A	B	A	B	B	B	A	B	A	A	A	A	A	B	B	B
Marker2038984	B	B	B	A	A	B	B	A	B	B	B	B	B	B	A	A	X	A	A	A	B	B	A	B	B	A	B	A	A	X	A	B	A	A	B	A	B	B	B	A	B	A	A	A	A	A	B	B	B
Marker2012400	B	B	B	A	A	B	B	A	B	B	B	B	B	B	A	A	B	A	A	A	B	B	A	B	B	A	B	A	A	X	A	B	A	A	B	A	B	B	B	A	B	A	A	A	A	A	B	B	B
Marker2042115	B	B	B	A	A	B	B	A	B	B	B	B	B	B	A	A	B	A	A	A	B	B	A	B	X	A	B	A	A	X	A	B	A	A	B	A	B	B	B	A	B	A	A	A	A	A	B	B	X
Marker2020087	B	B	B	A	A	B	B	A	B	B	A	H	B	B	X	A	B	A	A	A	B	B	A	B	X	A	B	A	A	A	A	B	X	A	B	A	B	B	B	A	B	A	A	A	A	A	B	B	A
Marker2009743	B	B	B	A	A	B	B	A	B	B	A	H	B	B	B	B	B	A	A	A	B	B	A	B	B	A	B	A	A	A	B	B	A	A	B	A	B	B	B	A	B	A	A	A	A	A	B	B	A
Marker2048522	B	B	B	A	A	B	B	A	B	B	A	B	B	B	B	B	B	A	A	A	B	B	A	B	B	A	B	A	A	A	B	B	A	A	B	A	B	B	B	B	B	A	A	A	A	A	B	B	A
Marker2083728	B	B	B	A	A	B	B	A	B	B	A	H	B	B	B	B	B	A	A	A	B	B	A	B	X	A	B	A	A	A	B	B	A	A	B	A	B	B	B	A	B	A	A	A	A	A	B	B	A
Marker2039844	B	B	B	A	A	B	B	A	B	B	A	B	B	B	B	B	B	A	A	A	B	B	A	B	X	A	B	A	A	A	B	B	X	A	B	A	B	B	B	A	B	A	A	A	A	A	B	B	A
Marker2060430	B	B	B	B	A	B	B	B	B	A	A	H	B	B	X	B	B	A	A	A	B	B	A	B	B	A	B	B	X	A	B	B	A	B	B	A	B	B	B	A	B	A	B	A	A	A	B	B	A
Marker2035058	B	B	B	B	A	B	B	B	B	A	A	H	B	B	X	B	B	A	A	A	B	B	A	B	B	A	B	B	A	A	B	B	A	B	B	A	B	B	B	A	B	A	B	A	A	A	B	B	A
Marker2062490	B	B	B	B	A	B	B	B	B	A	A	H	B	B	B	B	B	A	A	A	B	B	A	B	B	A	B	B	B	A	B	B	A	B	B	A	B	B	B	B	B	A	B	A	A	A	B	B	A
Marker2020354	B	B	B	B	A	B	B	B	B	A	A	H	B	B	B	B	B	A	A	A	B	B	A	B	B	A	B	B	A	A	B	B	A	B	B	A	B	B	B	B	B	A	B	A	A	A	B	B	A
Marker2086772	B	B	B	B	A	B	B	B	B	A	A	X	B	B	B	B	B	A	A	A	B	B	A	B	X	A	B	B	A	A	B	B	X	B	B	A	B	B	B	B	B	A	B	A	A	A	B	B	A
Marker2079777	B	B	B	B	A	B	B	B	B	A	A	H	B	B	B	B	B	A	A	A	B	B	A	B	B	A	B	B	B	A	B	B	A	A	B	A	B	B	B	A	B	A	B	A	A	A	X	B	A
Marker2014607	B	B	B	B	A	B	B	A	B	B	A	H	B	B	B	B	B	A	A	A	B	B	A	B	B	A	B	B	X	A	B	B	X	B	B	X	B	B	B	B	B	B	B	A	A	A	A	B	A
Marker2062954	B	B	B	B	A	B	B	A	B	B	A	H	B	B	B	B	B	A	A	A	B	B	A	B	B	A	B	B	B	A	B	B	X	B	B	X	B	B	B	B	B	B	B	A	A	A	A	B	A
Marker2049427	B	B	B	B	A	B	B	A	B	B	A	B	B	B	B	B	B	A	A	A	B	B	A	B	B	A	B	B	B	A	B	B	A	B	B	B	B	B	B	B	B	B	B	A	A	A	A	B	A
Marker2060092	B	B	B	B	A	B	B	A	B	B	A	H	B	B	B	B	B	A	A	A	B	B	A	B	B	A	B	B	A	A	B	B	A	B	B	B	B	B	B	B	B	X	B	A	A	A	A	B	A
Marker2069288	B	B	B	B	A	B	B	X	B	B	A	B	B	B	B	B	B	A	A	A	B	B	A	B	B	A	B	B	B	A	B	B	X	B	B	B	B	B	B	B	B	B	B	A	A	A	A	B	A
Marker2036747	B	B	B	B	A	B	B	A	B	X	A	B	B	B	B	B	B	A	A	A	B	B	A	B	X	A	B	B	X	A	B	B	X	B	B	B	B	B	B	B	B	B	B	A	A	A	X	B	A
Marker2072208	B	B	B	B	A	B	B	A	B	B	A	B	B	B	B	B	B	A	A	A	B	B	A	B	X	A	B	B	X	A	B	B	A	B	B	B	B	B	B	B	B	B	B	A	A	A	A	B	A
Marker2069564	B	B	B	B	A	B	B	X	B	B	A	H	B	B	B	B	B	A	A	A	B	B	A	B	X	A	B	B	X	A	B	B	X	B	B	B	B	B	B	B	B	B	B	A	A	A	A	B	A
Marker1709739	B	B	A	B	A	B	B	B	A	A	B	B	B	B	A	A	A	A	A	A	A	A	B	B	A	A	B	B	B	A	A	B	B	A	B	B	B	B	B	B	A	A	B	B	A	A	A	B	A
Marker1758729	B	B	A	B	A	B	B	X	A	A	B	A	X	B	A	A	A	A	A	A	X	A	B	B	X	A	B	B	X	A	A	B	B	A	B	X	B	X	B	B	A	A	B	B	A	A	A	B	A
Marker1756908	B	B	A	B	A	B	B	B	A	A	B	X	B	B	A	A	A	A	A	A	B	A	B	B	A	A	B	B	B	A	A	B	X	A	B	B	B	B	B	B	A	A	B	B	A	A	A	B	A
Marker1725967	X	B	A	B	A	B	B	B	A	A	B	A	B	B	A	A	A	A	A	A	B	A	B	B	A	A	B	B	X	A	A	B	X	A	B	B	B	B	B	B	A	A	B	B	A	A	A	B	A
Marker1676304	B	B	A	B	A	B	B	X	A	A	B	B	X	B	A	A	A	A	A	A	B	A	B	B	A	A	B	B	X	A	A	B	B	A	B	X	B	X	B	B	A	A	B	B	B	A	A	B	X
Marker1727982	X	B	A	B	A	B	B	B	A	A	B	X	X	B	A	A	A	A	A	A	B	A	B	B	X	A	B	B	B	A	A	B	X	A	B	X	B	X	B	B	A	A	B	B	B	A	A	B	A
Marker1757512	A	A	A	B	A	B	B	B	A	A	B	B	A	B	A	A	A	A	A	A	B	A	B	B	X	A	B	B	B	A	A	B	X	A	B	B	B	B	B	B	A	A	B	B	B	A	A	B	X
Marker1704840	A	A	A	B	A	B	B	B	A	A	B	B	A	B	A	A	A	A	A	A	B	A	B	B	A	A	B	B	B	A	A	B	B	A	B	B	B	B	B	B	A	A	B	B	B	A	A	B	A
Marker1676093	A	A	A	B	A	B	B	B	A	A	B	B	A	B	A	A	A	A	A	A	B	A	B	B	A	A	B	B	B	A	A	B	B	A	B	B	B	B	B	B	A	A	B	B	B	A	A	B	A
Marker1677599	X	X	A	B	A	B	B	X	A	A	B	X	A	B	A	A	A	A	A	A	B	A	B	B	X	A	B	B	X	A	A	B	B	A	B	B	B	B	B	B	A	A	B	B	B	A	A	B	X
Marker1728448	A	A	A	B	A	B	B	B	A	A	B	B	A	B	A	A	A	A	A	A	B	A	B	B	X	A	B	B	B	A	A	B	X	A	B	B	B	X	B	B	A	A	B	B	B	A	A	B	X
Marker1757284	A	A	A	B	A	B	B	X	A	A	B	X	A	B	A	A	A	A	A	A	B	A	B	B	X	A	B	B	X	A	A	B	B	A	B	B	B	B	B	B	A	A	B	B	B	A	A	B	A
Marker1728994	A	A	A	B	A	B	B	B	A	A	B	B	A	B	A	A	A	A	A	A	B	A	B	B	X	B	B	B	B	A	A	B	B	A	B	B	B	A	B	B	A	A	B	B	B	A	A	B	A
Marker1757563	A	A	A	B	A	B	B	X	A	A	B	A	A	B	X	A	A	A	A	A	B	A	B	B	X	A	B	B	X	A	A	B	B	A	B	B	B	X	B	B	A	A	B	B	B	A	A	B	A
Marker1750373	A	A	A	B	A	B	B	A	A	A	B	B	A	B	A	A	A	A	A	A	B	A	B	B	A	A	B	B	X	A	A	B	X	A	B	B	B	A	B	B	A	A	B	B	B	A	A	B	A
Marker1756369	A	A	A	B	A	B	B	A	A	A	B	B	A	B	A	A	A	A	A	A	B	A	B	B	A	B	B	B	X	A	A	B	B	A	B	B	B	A	B	B	A	A	B	B	B	A	A	B	A
Marker1747130	A	A	A	B	A	B	B	A	A	A	B	X	A	B	A	A	A	A	A	A	B	A	B	B	X	B	B	B	B	A	A	B	X	A	B	B	B	A	B	B	A	A	B	B	B	A	A	B	A
Marker1707644	A	A	A	B	A	B	B	A	A	A	B	A	A	B	X	A	A	A	A	A	B	A	B	B	A	B	B	B	B	A	A	B	X	A	B	B	B	A	B	B	A	A	B	B	B	A	A	B	A
Marker1746914	A	A	A	B	A	B	B	A	A	A	B	B	A	B	A	A	A	A	A	A	B	A	B	B	A	B	B	B	B	A	A	B	B	A	B	B	B	A	B	B	A	A	B	B	B	A	A	B	A
Marker1664255	A	A	A	B	A	B	B	A	A	A	B	B	A	B	X	A	A	A	A	A	B	A	B	B	A	B	B	B	X	A	A	B	B	A	B	B	B	A	B	B	A	A	B	B	B	A	A	B	A
Marker1689181	A	A	A	B	A	B	B	A	A	A	B	B	A	B	A	A	A	A	A	A	B	A	B	B	A	B	B	B	A	A	A	B	B	A	B	B	B	A	B	B	A	A	B	B	B	A	A	B	A
Marker1689284	A	A	A	B	A	B	B	A	A	A	B	X	A	B	A	A	A	A	A	A	B	X	B	B	A	X	B	B	X	A	A	B	B	A	B	B	B	A	B	B	A	A	B	B	B	A	A	B	A
Marker1712136	A	A	A	B	A	B	B	A	A	A	B	A	A	B	A	A	A	A	A	A	B	X	B	B	A	B	B	B	A	A	A	B	B	A	B	B	B	A	B	B	A	A	B	B	B	A	A	B	A
Marker1693118	A	A	A	B	A	B	B	A	A	A	B	A	A	B	X	A	A	A	A	A	B	A	B	B	X	B	B	B	B	A	A	B	B	A	B	B	B	A	B	B	X	A	B	B	B	A	X	B	A
Marker1730022	A	A	A	B	A	B	X	A	A	A	B	A	A	B	A	A	A	A	A	A	B	B	B	B	A	B	B	B	A	A	A	B	X	A	B	B	B	A	B	B	A	A	B	B	B	A	A	B	A
Marker1714764	A	A	A	B	A	B	B	A	A	A	B	A	A	B	A	A	A	A	A	B	B	B	B	B	A	B	B	B	A	A	A	B	B	A	B	B	B	A	B	B	A	A	B	B	B	A	B	B	A
Marker1687164	A	A	A	B	A	B	B	A	A	A	B	X	A	B	X	A	A	A	A	A	B	B	B	B	X	B	B	B	X	A	A	B	X	A	B	B	B	A	B	B	A	A	B	B	B	A	X	B	A
Marker1773605	A	A	A	B	A	B	B	A	A	A	B	A	A	B	A	A	X	A	A	B	B	B	B	B	A	B	B	B	A	A	A	B	B	A	B	B	B	A	B	B	B	A	B	B	B	A	B	B	A
Marker1707708	A	A	A	B	A	B	X	A	A	A	B	A	A	B	X	A	A	A	A	B	B	B	B	B	A	B	B	B	A	A	A	B	B	A	B	B	B	A	B	B	B	A	B	B	B	A	B	B	A
Marker1692324	A	A	A	B	A	B	B	A	A	A	B	A	A	B	X	A	A	A	A	B	X	B	B	B	A	B	X	B	A	A	A	B	X	A	B	B	B	A	B	B	B	A	B	B	B	A	B	B	A
Marker1722282	A	A	A	B	A	B	X	A	A	A	B	A	A	B	A	A	A	A	A	X	B	B	B	B	X	B	B	X	X	A	A	B	B	A	B	X	B	A	B	B	B	A	B	B	B	X	B	B	A
Marker1756848	A	A	A	B	A	B	X	A	A	A	B	A	A	B	A	A	A	A	A	B	B	B	B	B	X	B	B	B	X	A	A	B	B	A	B	B	B	A	B	B	B	A	B	B	B	A	X	B	A
Marker1686329	A	A	A	B	A	B	X	A	A	A	B	A	A	B	X	A	B	A	A	B	B	B	B	B	X	A	A	B	X	A	A	B	X	A	B	B	B	A	B	B	B	A	B	B	B	A	B	B	A
Marker1766292	A	A	A	B	A	B	B	A	A	A	B	A	A	B	A	A	B	A	A	B	B	B	B	B	X	A	A	B	A	A	A	B	X	A	B	B	B	A	B	B	B	A	B	B	B	X	B	B	A
Marker1671548	A	A	A	B	A	B	B	A	A	A	B	A	A	B	A	A	B	A	A	B	B	B	B	B	A	A	A	B	A	A	A	B	B	A	B	B	B	A	B	B	A	A	B	B	B	A	B	B	A
Marker1769482	A	A	A	B	H	B	B	A	A	A	B	A	A	A	A	A	B	A	A	B	A	B	B	B	X	A	A	B	X	A	A	A	B	A	B	B	B	A	B	B	A	A	B	B	B	B	B	B	A
Marker1687501	A	A	A	B	A	B	B	A	A	A	B	A	A	A	A	A	B	A	A	A	A	B	B	B	B	A	A	A	A	A	A	A	B	A	B	A	B	A	B	B	B	A	B	B	B	B	A	B	A
Marker1683183	A	A	A	B	A	B	B	A	A	A	B	A	A	X	A	A	B	A	A	A	A	B	B	B	B	A	A	A	X	A	A	X	X	A	B	A	X	A	B	B	X	A	B	B	B	B	A	B	A
Marker1779137	A	A	A	B	X	B	X	A	A	A	B	A	A	X	X	A	B	X	A	A	X	B	B	B	B	A	A	A	X	A	A	X	B	A	B	X	B	A	B	B	B	A	B	B	B	B	A	B	A
Marker1709592	A	A	A	B	A	B	B	A	A	A	B	A	A	A	B	B	B	B	A	A	A	B	B	B	B	A	A	A	B	A	A	A	B	A	B	A	B	A	B	A	B	A	B	B	B	B	A	B	A
Marker1723611	X	A	A	B	H	B	B	A	A	A	B	A	A	A	B	B	B	B	A	A	A	B	B	B	B	A	A	A	B	A	A	A	X	A	B	A	B	A	B	A	B	A	B	B	B	B	A	B	A
Marker1705376	A	A	A	B	H	B	A	A	A	A	B	A	A	B	B	B	B	B	A	B	A	B	B	B	B	B	A	A	A	A	A	A	B	B	B	A	B	A	B	A	B	A	B	B	B	B	A	B	A
Marker1756727	B	B	X	B	H	B	X	A	A	A	B	A	A	B	X	A	B	B	A	B	A	B	B	B	B	B	A	A	X	A	A	A	X	B	B	A	X	A	A	A	A	A	B	B	B	B	A	B	A
Marker1764979	B	B	A	B	A	B	A	A	A	A	B	A	A	B	B	A	B	B	A	B	A	B	X	B	B	B	A	A	A	A	A	A	B	B	B	A	A	A	A	A	A	A	B	B	B	B	A	B	A
Marker1761673	B	B	X	B	A	B	A	A	A	A	B	A	A	B	B	A	B	B	A	X	A	X	B	B	B	B	A	A	A	A	A	A	B	B	B	A	A	A	A	A	A	A	B	B	B	B	A	B	A
Marker1668938	B	B	A	B	A	B	A	A	A	A	B	A	A	B	B	A	B	B	A	B	A	B	B	B	B	B	A	A	A	A	A	A	B	B	B	A	A	A	A	A	A	A	B	B	B	B	A	B	A
Marker1682260	B	B	A	B	A	B	X	A	A	X	B	A	A	B	X	A	B	B	A	X	A	B	B	B	B	B	A	A	X	A	A	A	B	B	B	A	A	A	A	X	A	A	B	B	B	B	A	B	A
Marker1753845	B	B	A	B	H	B	X	A	A	A	B	A	A	B	A	A	B	B	A	B	A	A	B	B	B	B	A	A	A	A	A	A	B	B	B	A	A	A	A	A	A	A	B	B	B	B	A	B	A
Marker1689776	B	B	B	A	X	B	B	A	B	B	B	A	A	B	A	A	B	B	A	B	A	A	A	B	B	B	A	A	X	A	B	A	B	B	B	A	A	A	A	H	A	A	B	B	B	B	A	B	A
Marker1776782	B	B	B	A	A	B	B	A	B	B	B	A	A	B	X	A	B	B	A	B	A	A	A	B	B	B	A	A	A	A	B	A	B	B	B	A	A	A	A	H	A	A	B	B	B	B	A	B	A
Marker1716523	B	B	B	A	A	B	B	A	B	B	B	A	A	B	A	A	B	B	A	B	A	A	A	B	B	B	A	A	B	A	B	A	B	B	B	A	A	A	A	H	A	A	B	B	B	B	A	B	A
Marker1760994	B	B	B	A	A	B	B	A	B	B	B	A	A	B	A	A	B	B	A	B	A	A	A	B	B	B	A	A	B	A	B	A	B	B	B	A	A	A	A	A	A	A	B	B	B	B	A	B	A
Marker1681493	B	B	B	A	X	B	B	A	B	B	B	A	A	B	A	A	B	B	A	B	A	A	A	B	B	B	A	A	A	A	B	A	B	B	B	A	A	A	A	X	A	A	B	B	B	B	A	B	A
Marker1742966	B	B	B	A	H	B	B	A	B	B	B	A	A	B	A	A	B	B	A	B	A	A	A	B	B	B	A	A	X	A	B	A	B	B	B	A	A	A	A	X	A	A	B	B	B	B	A	B	A
Marker1766868	B	B	B	A	A	B	B	A	B	B	B	A	A	B	A	A	B	B	A	B	A	A	A	B	B	B	A	A	B	A	B	A	X	B	B	A	A	A	A	H	A	A	B	B	B	B	A	B	A
Marker1729707	B	B	B	A	A	B	B	A	B	B	B	A	A	B	A	A	B	B	A	B	A	A	A	B	B	B	A	A	X	A	B	A	B	B	B	A	A	A	A	A	A	A	B	B	B	B	A	B	A
Marker1704462	B	B	B	A	A	B	B	A	B	B	B	A	A	B	A	A	B	B	A	B	A	A	A	B	B	B	A	A	A	A	B	A	B	B	B	A	A	A	A	A	A	A	B	B	B	B	A	B	A
Marker1699690	B	B	B	A	A	B	B	A	B	B	B	A	A	B	A	A	B	B	A	B	A	A	A	B	B	B	A	A	X	A	B	A	B	B	B	A	A	A	A	A	A	A	B	B	B	B	A	B	A
Marker1672672	B	B	B	A	A	B	B	A	B	B	B	A	A	B	A	A	B	B	A	B	A	A	A	B	B	B	A	A	X	A	B	A	B	B	B	A	A	A	A	A	A	A	B	B	B	B	A	B	A
Marker1674904	B	B	B	A	X	B	B	A	B	B	B	A	A	B	A	A	B	B	A	B	A	A	A	B	B	B	A	A	A	A	B	A	B	B	B	A	A	A	A	A	A	A	B	B	B	B	A	B	A
Marker1673875	B	B	B	A	A	B	B	A	B	B	B	A	A	B	A	A	B	B	A	B	A	A	A	B	B	B	A	A	A	A	B	A	B	B	B	A	A	A	A	H	A	A	B	B	B	B	A	B	A
Marker1716393	B	B	B	A	A	B	B	A	B	B	B	A	A	B	A	A	B	B	A	B	A	A	A	B	B	B	A	A	B	A	B	A	B	B	B	A	A	A	A	A	A	A	H	B	B	B	A	B	A
Marker1695445	B	B	B	A	H	B	B	A	B	B	B	A	A	B	A	A	B	B	A	B	A	A	A	A	B	B	A	A	X	A	B	A	B	B	B	A	A	A	A	A	A	A	H	B	B	B	A	B	A
Marker1703269	B	B	B	A	H	B	B	A	B	B	B	A	A	B	A	A	B	B	A	B	A	A	A	B	B	B	A	A	A	A	B	A	B	B	B	A	A	A	A	H	A	A	B	B	B	B	A	B	A
Marker1726552	B	B	B	A	A	B	B	A	B	B	B	A	A	B	A	A	B	B	A	B	A	A	A	B	B	B	A	A	X	A	B	A	X	B	B	A	A	A	A	B	A	A	B	B	B	B	A	B	A
Marker1760945	B	B	B	A	A	B	B	A	B	B	B	A	A	B	A	A	B	B	A	B	A	A	A	B	B	B	A	A	A	A	B	A	B	B	B	A	A	A	A	B	A	A	B	B	B	B	A	B	A
Marker1753020	B	B	B	A	H	B	B	A	B	B	B	A	A	B	A	A	B	B	A	B	A	A	A	B	B	B	A	A	B	A	B	A	B	B	B	A	A	A	A	B	A	A	B	B	B	B	A	B	A
Marker1666344	B	B	B	A	X	B	B	A	B	B	B	A	A	B	A	A	B	B	A	B	A	A	A	B	B	B	A	A	X	A	B	A	B	B	B	A	A	A	A	B	A	A	B	B	B	B	A	B	A
Marker1737477	B	B	B	A	X	B	B	A	B	B	B	A	A	B	A	A	B	B	A	B	A	A	A	B	B	B	A	A	B	A	B	A	X	B	B	A	A	A	A	B	A	A	B	B	B	B	A	B	A
Marker1719152	B	B	B	A	A	B	B	A	B	B	B	A	A	B	A	A	B	B	A	B	A	A	A	B	B	B	A	A	X	A	B	A	X	B	B	A	A	A	A	H	A	A	B	B	B	B	A	B	A
Marker1732971	B	B	B	A	A	B	B	A	B	B	B	A	A	B	A	A	B	B	A	B	A	A	A	B	B	B	A	A	B	A	B	A	B	B	B	A	A	A	A	A	A	A	B	B	B	B	A	B	A
Marker1773125	B	B	B	A	A	B	B	A	B	B	B	A	A	B	A	A	B	B	A	B	A	A	A	B	B	B	A	A	X	A	B	A	X	B	B	A	A	A	A	X	A	A	B	B	B	B	A	B	A
Marker1728667	B	B	B	A	A	B	B	A	B	B	B	A	A	B	A	A	B	B	A	B	A	A	A	B	B	B	A	A	B	A	B	A	B	B	B	A	A	A	A	A	A	A	B	B	B	B	A	B	A
Marker1703850	B	B	B	A	H	B	B	A	B	B	B	A	A	B	A	A	B	B	A	B	A	A	A	B	B	B	A	A	B	A	B	A	B	B	B	A	A	A	A	A	A	A	B	B	B	B	A	B	A
Marker1671330	B	B	B	A	X	B	B	A	B	B	B	A	A	B	A	A	B	B	A	B	A	A	A	B	B	B	A	A	B	A	B	A	X	B	B	A	A	A	A	A	A	A	B	B	B	B	A	B	A
Marker1757825	B	B	B	A	H	B	B	A	B	B	B	A	A	B	A	A	B	B	A	B	A	A	A	B	B	B	A	A	B	A	B	A	B	B	B	A	A	A	A	H	A	A	B	B	B	B	A	B	A
Marker1698468	B	B	B	A	H	B	B	A	B	B	B	A	A	B	A	A	B	B	A	B	A	A	A	B	B	B	A	A	X	A	B	A	B	B	B	A	A	A	A	A	A	A	B	B	B	B	A	B	A
Marker1725009	B	B	B	A	H	B	B	A	B	B	B	A	A	B	A	A	B	B	A	B	A	A	A	B	B	B	A	A	B	A	B	A	B	B	B	A	A	A	A	A	A	A	B	B	B	B	A	B	A
Marker1767840	B	B	B	A	A	B	B	A	B	B	B	A	A	B	A	A	B	B	A	B	A	A	A	B	B	B	A	A	B	A	B	A	B	B	B	A	A	A	A	A	A	A	B	B	B	B	A	B	A
Marker1752414	B	B	B	A	A	B	B	A	B	B	B	A	A	B	A	A	B	B	A	B	A	A	A	B	B	B	A	A	B	A	B	A	B	B	B	A	A	A	A	A	A	A	B	B	B	B	A	B	A
Marker1715307	B	B	B	A	A	B	B	A	B	B	B	A	A	B	A	A	B	B	A	B	A	A	A	B	B	B	A	A	B	A	B	A	B	B	B	A	A	A	A	A	A	A	B	B	B	B	A	B	A
Marker1740880	B	B	B	A	A	B	B	A	B	B	B	A	A	B	A	A	B	B	A	B	A	A	A	B	B	B	A	A	X	A	B	A	B	B	B	A	A	A	A	B	A	A	B	B	B	B	A	B	A
Marker1742048	B	B	B	A	A	B	B	A	B	B	B	A	A	B	A	A	B	B	A	B	A	A	A	B	B	B	A	A	B	A	B	A	B	B	B	A	A	A	A	B	A	A	B	B	B	B	A	B	A
Marker1703407	B	B	B	A	A	B	B	A	B	B	B	A	A	B	A	A	B	B	A	B	A	A	A	A	B	B	A	A	X	A	B	A	B	B	B	A	A	A	A	B	A	A	B	B	B	B	A	B	A
Marker1742011	B	B	B	A	A	B	B	A	B	B	B	A	A	B	A	A	B	B	A	B	A	A	A	A	B	B	A	A	B	A	B	A	B	B	B	A	A	A	A	B	A	A	B	B	B	A	A	B	A
Marker1728457	B	B	B	A	A	B	B	A	B	B	B	A	A	B	A	A	B	B	A	B	A	A	A	A	B	B	A	A	X	A	B	A	B	B	B	A	A	A	A	B	A	A	B	B	B	A	A	B	A
Marker1735658	B	B	B	A	X	B	B	A	B	B	B	A	A	B	A	A	B	B	A	B	A	A	A	A	B	B	A	A	X	A	B	A	B	B	B	A	A	A	A	B	A	A	B	B	B	A	A	B	A
Marker1774304	B	B	B	A	A	B	B	A	B	B	B	A	A	B	A	A	B	B	A	B	A	A	A	A	B	B	A	A	B	A	B	A	B	B	B	A	A	A	A	B	A	A	B	B	B	A	A	B	A
Marker1688782	B	B	B	A	A	B	B	A	B	B	B	A	A	B	A	A	B	B	A	B	A	A	A	A	X	B	A	A	X	A	B	A	B	B	B	A	A	A	A	B	A	A	B	B	B	A	A	B	A
Marker1777305	B	B	B	A	A	B	B	A	B	B	B	A	A	B	A	A	B	B	A	B	A	A	A	A	X	B	A	A	B	A	B	A	B	B	B	A	A	A	A	B	A	A	B	B	B	A	A	B	A
Marker1668224	X	B	B	A	X	B	B	A	B	B	B	A	A	B	A	A	B	B	A	B	A	A	A	A	X	B	A	A	X	A	B	A	X	B	B	A	A	A	A	B	A	A	B	B	B	A	A	B	A
Marker1691972	B	B	B	A	A	B	B	A	B	B	B	A	A	B	A	A	B	B	A	B	A	A	A	A	B	B	A	A	B	A	B	A	B	B	B	A	A	A	A	B	A	A	X	B	B	A	A	B	A
Marker1710911	B	B	B	A	A	B	B	A	B	B	B	A	A	B	A	A	B	B	A	B	A	A	A	A	B	B	A	A	X	A	B	A	X	B	B	A	A	A	A	B	A	A	H	B	B	A	A	B	A
Marker1730199	B	B	B	A	A	B	B	A	B	B	B	A	A	B	A	A	B	B	A	B	A	A	A	A	X	B	A	A	X	A	B	A	B	B	B	A	A	A	A	B	A	A	B	B	B	A	A	B	A
Marker1735226	B	B	B	A	A	B	B	A	B	B	B	A	A	B	A	A	B	B	A	B	A	A	A	A	X	B	A	A	B	A	B	A	B	B	B	A	A	A	A	B	A	A	B	B	B	A	A	B	A
Marker1747183	B	B	B	A	A	B	B	A	B	B	B	A	A	B	A	A	B	B	A	B	A	A	A	A	X	B	A	A	X	A	B	A	B	B	B	A	A	A	A	B	A	A	B	B	B	A	A	B	A
Marker1754290	B	B	B	A	A	B	B	A	B	B	B	A	A	B	A	A	B	B	A	B	A	A	A	A	B	B	A	A	B	A	B	A	B	B	B	A	A	A	A	B	A	A	B	B	B	A	A	B	A
Marker1755063	B	B	B	A	A	B	B	A	B	B	B	A	A	B	A	A	B	B	A	B	A	A	A	A	B	B	A	A	B	A	B	A	B	B	B	A	A	A	A	B	A	A	B	B	B	A	A	B	A
Marker1755927	B	B	B	A	A	B	B	A	B	B	B	A	A	B	A	A	B	B	A	B	A	A	A	A	X	B	A	A	B	A	B	A	B	B	B	A	A	A	A	B	A	A	B	B	B	A	A	B	A
Marker1768651	B	B	B	A	A	B	B	A	B	B	B	A	A	B	A	A	B	B	A	B	A	A	A	A	B	B	A	A	A	A	B	A	B	B	B	A	A	A	A	B	A	A	B	B	B	A	A	B	A
Marker1704562	B	B	B	A	X	B	B	A	B	B	B	A	A	B	A	A	B	B	A	B	A	A	A	A	B	B	A	A	A	A	B	A	X	B	B	A	A	A	A	B	A	A	B	B	B	A	A	B	A
Marker1725128	B	B	B	A	A	B	B	A	B	B	B	A	A	B	A	A	B	B	A	B	A	A	A	A	B	B	A	A	A	A	B	A	B	B	B	A	A	A	A	B	A	A	B	B	B	A	A	B	A
Marker1686532	X	B	B	A	A	B	B	A	B	B	B	A	A	B	A	A	B	B	A	B	A	A	A	A	X	B	A	A	X	A	B	A	X	B	B	A	A	A	A	B	A	A	B	B	B	A	A	B	A
Marker1672431	B	B	B	A	A	B	B	A	B	B	B	A	A	B	A	A	B	B	A	B	A	A	A	A	X	B	A	A	A	A	B	A	B	B	B	A	A	A	A	B	A	A	B	B	B	A	A	B	A
Marker1686582	B	B	B	A	A	B	B	A	B	B	B	A	A	B	A	A	B	B	A	B	A	A	A	A	B	B	A	A	X	A	B	A	B	B	B	A	A	A	A	B	A	A	B	B	B	A	A	B	A
Marker1716082	B	B	B	A	A	B	B	A	B	B	B	A	A	B	A	A	B	B	A	B	A	A	A	A	B	B	A	A	X	A	B	A	B	B	B	A	A	A	A	B	A	A	B	B	B	A	A	B	A
Marker1722248	B	B	B	A	A	B	B	A	B	B	B	A	A	B	A	A	B	B	A	B	A	A	A	A	B	B	A	A	A	A	B	A	X	B	B	A	A	A	A	B	A	A	B	B	B	A	A	B	A
Marker1717483	B	B	B	A	A	B	B	A	B	B	B	A	A	B	A	A	B	B	A	B	A	A	A	A	X	B	A	A	A	A	B	A	X	B	B	A	A	A	A	B	A	A	B	B	B	A	A	B	A
Marker1768209	B	B	B	A	X	B	B	A	B	B	B	A	A	B	A	A	B	B	A	B	A	A	A	A	B	B	A	A	X	A	B	A	B	B	B	A	A	A	A	B	A	A	X	B	B	A	A	B	A
Marker1674865	B	B	B	A	A	B	B	A	B	B	B	A	A	B	A	A	B	B	A	B	A	A	A	A	X	B	A	A	A	A	B	A	B	B	B	A	A	A	A	B	A	A	B	B	B	A	A	B	A
Marker1772338	B	B	B	A	A	B	B	A	B	B	B	A	A	B	A	A	B	B	A	B	A	A	A	A	B	B	A	A	X	A	B	A	B	B	B	A	A	A	A	B	A	A	B	B	B	A	A	B	A
Marker1774291	B	B	B	A	A	B	B	A	B	B	B	A	A	B	A	A	B	B	A	B	A	A	A	A	B	B	A	A	X	A	B	A	B	B	B	A	A	A	A	B	A	A	B	B	B	A	A	B	A
Marker1723847	B	B	B	A	H	B	B	A	B	B	B	A	A	B	A	A	B	B	A	B	A	A	A	A	B	B	A	A	B	A	B	A	B	B	B	A	A	A	A	B	A	A	B	B	B	A	A	B	A
Marker1727589	B	B	B	A	X	B	B	A	B	B	B	A	A	B	A	A	B	B	A	B	A	A	A	A	B	B	A	A	B	A	B	A	B	B	B	A	A	A	A	B	A	A	B	B	B	A	A	B	A
Marker1730320	B	B	B	A	H	B	B	A	B	B	B	A	A	B	A	A	B	B	A	B	A	A	A	A	B	B	A	A	B	A	B	A	B	B	B	A	A	A	A	B	A	A	B	B	B	A	A	B	A
Marker1739921	B	B	B	A	X	B	B	A	B	B	B	A	A	B	A	A	B	B	A	B	A	A	A	A	B	B	A	A	B	A	B	A	X	B	B	A	A	A	A	B	A	A	H	B	B	A	A	B	A
Marker1773856	B	B	B	A	A	B	B	A	B	B	B	A	A	B	A	A	B	B	A	B	A	A	A	A	B	B	A	A	B	A	B	A	B	B	B	A	A	A	A	B	A	A	H	B	B	A	A	B	A
Marker1685106	B	B	B	A	X	B	B	A	B	B	B	A	A	B	A	A	B	B	A	B	A	A	A	A	B	B	A	A	B	A	B	A	B	B	B	A	A	A	A	B	A	A	B	B	B	A	A	B	A
Marker1745842	B	B	B	A	A	B	B	A	B	B	B	A	A	B	A	A	B	B	A	B	A	A	A	A	B	B	A	A	B	A	B	A	B	B	B	A	A	A	A	B	A	A	B	B	B	A	A	B	A
Marker1731694	B	B	B	A	H	B	B	A	B	B	B	A	A	B	A	A	B	B	A	B	A	A	A	A	B	B	A	A	B	A	B	A	B	B	B	A	A	A	A	B	A	A	B	B	B	A	A	B	A
Marker1732059	B	B	B	A	X	B	B	A	B	B	B	A	A	B	A	A	B	B	A	B	A	A	A	A	X	B	A	A	B	A	B	A	X	B	B	A	A	A	A	B	A	A	B	B	B	A	A	B	A
Marker1663664	B	B	B	A	A	B	B	A	B	B	B	A	A	B	A	A	B	B	A	B	A	A	A	A	B	B	A	A	B	A	B	A	X	B	B	A	A	A	A	B	A	A	B	B	B	A	A	B	A
Marker1741109	B	B	B	A	A	B	B	A	B	B	B	A	A	B	A	A	B	B	A	B	A	A	A	A	X	B	A	A	B	A	B	A	B	B	B	A	A	A	A	B	A	A	B	B	B	A	A	B	A
Marker1727099	B	B	B	A	A	B	B	A	B	B	B	A	A	B	A	A	B	B	A	B	A	A	A	A	B	B	A	A	B	A	B	A	B	B	B	A	A	A	A	B	A	A	H	B	B	A	A	B	A
Marker1714200	B	B	B	A	A	B	B	A	B	B	B	A	A	B	A	A	B	B	A	B	A	A	A	A	B	B	A	A	B	A	B	A	B	B	B	A	A	A	A	B	A	A	H	B	B	A	A	B	A
Marker1692067	B	B	B	A	A	B	B	A	B	B	B	A	A	B	A	A	B	B	A	B	A	A	A	A	B	B	A	A	B	A	B	A	B	B	B	A	A	A	A	B	A	A	H	B	B	A	A	B	A
Marker1667041	X	B	B	A	A	B	B	A	B	B	B	A	A	B	A	A	B	B	A	B	A	A	A	A	B	B	A	A	X	A	B	A	B	B	B	A	A	A	A	B	A	A	H	B	B	A	A	B	A
Marker1752061	B	B	B	A	A	B	B	A	B	B	B	A	A	B	A	A	B	B	A	B	A	A	A	A	B	B	A	A	B	A	B	A	B	B	B	A	A	A	A	B	A	A	H	B	B	A	A	B	A
Marker1667494	B	B	B	A	A	B	B	A	B	B	B	A	A	B	A	A	B	B	A	B	A	A	A	A	B	B	A	A	X	A	B	A	B	B	B	A	A	A	A	B	A	A	B	B	B	A	A	B	A
Marker1668632	B	B	B	A	A	B	B	A	B	B	B	A	A	B	A	A	B	B	A	B	A	A	A	A	B	B	A	A	B	A	B	A	B	B	B	A	A	A	A	B	A	A	B	B	B	A	A	B	A
Marker1674215	B	B	B	A	A	B	B	A	B	B	B	A	A	B	A	A	B	B	A	B	A	A	A	A	B	B	A	A	B	A	B	A	B	B	B	A	A	A	A	B	A	A	B	B	B	A	A	B	A
Marker1759843	B	B	B	A	A	B	B	A	B	B	B	A	A	B	A	A	B	B	A	B	A	A	A	A	B	B	A	A	B	A	B	A	B	B	B	A	A	A	A	B	A	A	B	B	B	A	A	B	A
Marker1772030	B	B	B	A	A	B	B	A	B	B	B	A	A	B	A	A	B	B	A	B	A	A	A	A	B	B	A	A	B	A	B	A	B	B	B	A	A	A	A	B	A	A	B	B	B	A	A	B	A
Marker1718524	B	B	B	A	A	B	B	A	B	B	B	A	A	B	A	A	B	B	A	B	A	A	A	A	B	B	A	A	B	A	B	A	B	B	B	A	A	A	A	B	A	A	B	B	B	A	A	B	A
Marker1674282	B	B	B	A	A	B	B	A	B	B	B	A	A	B	A	A	B	B	A	B	A	A	A	A	B	B	A	A	B	A	B	A	B	B	B	A	A	A	A	B	A	A	B	B	B	A	A	B	A
Marker1762068	B	B	B	A	X	B	B	A	B	B	B	A	A	B	A	A	B	B	A	B	A	A	A	A	B	B	A	A	B	A	B	A	X	B	B	A	A	A	A	B	A	A	B	B	B	A	A	B	A
Marker1760242	B	B	B	A	H	B	B	A	B	B	B	A	A	B	A	A	B	B	A	B	A	A	A	A	B	B	A	A	B	A	B	A	X	B	B	A	A	A	A	B	A	A	B	B	B	A	A	B	A
Marker1738761	B	B	B	A	A	B	B	A	B	B	B	A	A	B	A	A	B	B	A	B	A	A	A	A	B	B	A	A	B	A	B	A	B	B	B	A	A	A	A	B	A	A	B	B	B	A	A	B	A
Marker1762405	B	B	B	A	A	B	B	A	B	B	B	A	A	B	A	A	B	B	A	B	A	A	A	A	B	B	A	A	B	A	B	A	B	B	B	A	A	A	A	B	A	A	B	B	B	A	A	B	A
Marker1755104	B	B	B	A	H	B	B	A	B	B	B	A	A	B	A	A	B	B	A	B	A	A	A	A	B	B	A	A	B	A	B	A	B	B	B	A	A	A	A	B	A	A	B	B	B	A	A	B	A
Marker1765541	B	B	B	A	H	B	B	A	B	B	B	A	A	B	A	A	B	B	A	B	A	A	A	A	B	B	A	A	B	A	B	A	B	B	B	A	A	A	A	B	A	A	B	B	B	A	A	B	A
Marker1730519	B	B	B	A	H	B	B	A	B	B	B	A	A	B	A	A	B	B	A	B	A	A	A	A	B	B	A	A	B	A	B	A	B	B	B	A	A	A	A	B	A	A	B	B	B	A	A	B	A
Marker1759886	B	B	B	A	A	B	B	A	B	B	B	A	A	B	A	A	B	B	A	B	A	A	A	A	B	B	A	A	B	A	B	A	B	B	B	A	A	A	A	B	A	A	B	B	B	A	A	B	A
Marker1750344	B	B	B	A	A	B	B	A	B	B	B	A	A	B	A	A	B	B	A	B	A	A	A	A	B	B	A	A	B	A	B	A	B	B	B	A	A	A	A	B	A	A	B	B	B	A	A	B	A
Marker1664324	B	B	B	A	A	B	B	A	B	B	B	A	A	B	A	A	B	B	A	B	A	A	A	A	B	B	A	A	B	A	B	A	B	B	B	A	A	A	A	B	A	A	B	B	B	A	A	B	A
Marker1668440	B	B	B	A	A	B	B	A	B	B	B	A	A	B	A	A	B	B	A	B	A	A	A	A	B	B	A	A	B	A	B	A	B	B	B	A	A	A	A	B	A	A	B	B	B	A	A	B	A
Marker1721264	B	B	B	A	A	B	B	A	B	B	B	A	A	B	A	A	B	B	A	B	A	A	A	A	B	B	A	A	B	A	B	A	B	B	B	A	A	A	A	B	A	A	B	B	B	A	A	B	A
Marker1729455	B	B	B	A	A	B	B	A	B	B	B	A	A	B	A	A	B	B	A	B	A	A	A	A	B	B	A	A	B	A	B	A	B	B	B	A	A	A	A	B	A	A	B	B	B	A	A	B	A
Marker1695309	B	B	B	A	A	B	B	A	B	B	B	A	A	B	A	A	B	B	A	B	A	A	A	A	B	B	A	A	B	A	B	A	X	B	B	A	A	A	A	B	A	A	B	B	B	A	A	B	A
Marker1738578	B	B	B	A	A	B	B	A	B	B	B	A	A	B	A	A	B	B	A	B	A	A	A	A	B	B	A	A	B	A	B	A	B	B	B	A	A	A	A	B	A	A	B	B	B	A	A	B	A
Marker1740020	B	B	B	A	A	B	B	A	B	B	B	A	A	B	A	A	B	B	A	B	A	A	A	A	B	B	A	A	B	A	B	A	B	B	B	A	A	A	A	B	A	A	B	B	B	A	A	B	A
Marker1691511	B	B	B	A	A	B	B	A	B	B	B	A	A	B	A	A	B	B	A	B	A	A	A	A	B	B	A	A	B	A	B	A	B	B	B	A	A	A	A	B	A	A	B	B	B	A	A	B	A
Marker1724467	B	B	B	A	A	B	B	A	B	B	B	A	A	B	A	A	B	B	A	B	A	A	A	A	X	B	A	A	B	A	B	A	B	B	B	A	A	A	A	B	A	A	B	B	B	A	A	B	A
Marker1680145	B	B	B	A	A	B	B	A	B	B	B	A	A	B	A	A	B	B	A	B	A	A	A	A	B	B	A	A	B	A	B	A	B	B	B	A	A	A	A	B	A	A	X	B	B	A	A	B	A
Marker1719211	B	B	B	A	A	B	B	A	B	B	B	A	A	B	A	A	B	B	A	B	A	A	A	A	B	B	A	A	B	A	B	A	B	B	B	A	A	A	A	B	A	A	B	B	B	A	A	B	A
Marker1682743	B	B	B	A	A	B	B	A	B	B	B	A	A	B	A	A	B	B	A	B	A	A	A	A	B	B	A	A	B	A	B	A	B	B	B	A	A	A	A	B	A	A	B	B	B	A	A	B	A
Marker1689438	B	B	B	A	A	B	B	A	B	B	B	A	A	B	A	A	B	B	A	B	A	A	A	A	B	B	A	A	B	A	B	A	B	B	B	A	A	A	A	B	A	A	B	B	B	A	A	B	A
Marker1676837	B	B	B	A	A	B	B	A	B	B	B	A	A	B	A	A	B	B	A	B	A	A	A	A	B	B	A	A	X	A	B	A	B	B	B	A	A	A	A	B	A	A	B	B	B	A	A	B	A
Marker1713657	B	B	B	A	A	B	B	A	B	B	B	A	A	B	A	A	B	B	A	B	A	A	A	A	B	B	A	A	B	A	B	A	B	B	B	A	A	A	A	B	A	A	B	B	B	A	A	B	A
Marker1717304	B	B	B	A	A	B	B	A	B	B	B	A	A	B	A	A	B	B	A	B	A	A	A	A	B	B	A	A	B	A	B	A	B	B	B	A	A	A	A	B	A	A	B	B	B	A	A	B	A
Marker1726375	B	B	B	A	A	B	B	A	B	B	B	A	A	B	A	A	B	B	A	B	A	A	A	A	B	B	A	A	B	A	B	A	B	B	B	A	A	A	A	B	A	A	B	B	B	A	A	B	A
Marker1761369	B	B	B	A	A	B	B	A	B	B	B	A	A	B	A	A	B	B	A	B	A	A	A	A	X	B	A	A	X	A	B	A	B	B	B	A	A	A	A	B	A	A	B	B	B	A	A	B	A
Marker1767101	B	B	B	A	A	B	B	A	B	B	B	A	A	B	A	A	B	B	A	B	A	A	A	A	X	B	A	A	B	A	B	A	B	B	B	A	A	A	A	B	A	A	B	B	B	A	A	B	A
Marker1732168	B	B	B	A	A	B	B	A	B	B	B	A	A	B	A	A	B	B	A	B	A	A	A	A	B	B	A	A	X	A	B	A	B	B	B	A	A	A	A	B	A	A	B	B	B	A	A	B	A
Marker1720733	X	B	B	A	X	B	B	A	B	B	B	A	A	B	A	A	B	B	A	B	A	A	A	A	B	B	A	A	X	A	B	A	B	B	B	A	A	A	A	B	A	A	X	B	B	A	A	B	A
Marker1669081	B	B	B	A	X	B	B	A	B	B	B	A	A	B	A	A	B	B	A	B	A	A	A	A	X	B	A	A	B	A	B	A	X	B	B	A	A	A	A	B	A	A	X	B	B	A	A	B	A
Marker1698394	B	B	B	A	X	B	B	A	B	B	B	A	A	B	A	A	B	B	A	B	A	A	A	A	B	B	A	A	B	A	B	A	X	B	B	A	A	A	A	B	A	A	X	B	B	A	A	B	A
Marker1724956	B	B	B	A	X	B	B	A	B	B	B	A	A	B	A	A	B	B	A	B	A	A	A	A	X	B	A	A	X	A	B	A	B	B	B	A	A	A	A	B	A	A	H	B	B	A	A	B	A
Marker1718192	B	B	B	A	A	B	B	A	B	B	B	A	A	B	A	A	B	B	A	B	A	A	A	A	B	B	A	A	B	A	B	A	X	B	B	A	A	A	A	B	A	A	H	B	B	A	A	A	A
Marker1672798	B	B	B	A	A	B	B	A	B	B	B	A	A	B	A	A	B	B	A	B	A	A	A	A	B	B	A	A	B	A	B	A	B	B	B	A	A	A	A	B	A	A	B	B	B	A	A	A	A
Marker1763155	B	B	B	A	A	B	B	A	B	B	B	A	A	B	A	A	B	B	A	B	A	A	A	A	B	B	A	A	B	A	B	A	B	B	B	A	A	A	A	B	A	A	H	B	B	A	A	A	A
Marker1678875	B	B	B	A	A	B	B	A	B	B	B	A	A	B	A	A	B	B	A	B	A	A	A	A	B	B	A	A	B	A	B	A	B	B	B	A	A	A	A	B	A	A	H	B	B	A	A	A	A
Marker1775265	B	B	B	A	A	B	B	A	B	B	B	A	A	B	A	A	B	B	A	B	A	A	A	A	B	B	A	A	B	A	B	A	B	B	B	A	A	A	A	B	A	A	H	B	B	A	A	A	A
Marker1725934	B	B	B	A	A	B	B	A	B	B	B	A	A	B	A	A	B	B	A	B	A	A	A	A	B	B	A	A	B	A	B	A	B	B	B	A	A	A	A	B	A	A	B	B	B	A	A	A	A
Marker1671372	B	B	B	A	A	B	B	A	B	B	B	A	A	B	A	A	B	B	A	B	A	A	A	A	B	B	A	A	B	A	B	A	B	B	B	A	A	A	A	B	A	A	B	B	B	A	A	A	A
Marker1667414	B	B	B	A	A	B	B	A	B	B	B	A	A	B	A	A	B	B	A	B	A	A	A	A	B	B	A	A	B	A	B	A	B	B	B	A	A	A	A	B	A	A	B	B	B	A	A	A	A
Marker1718042	B	B	B	A	X	B	B	A	B	B	B	A	A	B	A	A	B	B	A	B	A	A	A	A	B	B	A	A	B	A	B	A	X	B	B	A	A	A	A	B	A	A	B	B	B	A	A	A	A
Marker1679715	B	B	B	A	A	B	B	A	B	B	B	A	A	B	A	A	B	B	A	B	A	A	A	A	B	B	A	A	B	A	B	A	X	B	B	A	A	A	A	B	A	A	B	B	B	A	A	A	A
Marker1703355	B	B	B	A	A	B	B	A	B	B	B	A	A	B	A	A	B	B	A	B	A	A	A	A	B	B	A	A	B	A	B	A	B	B	B	A	A	A	A	B	A	A	B	B	B	A	A	A	A
Marker1703248	B	B	B	A	A	B	B	A	B	B	B	A	A	B	A	A	B	B	A	B	A	A	A	A	B	B	A	A	B	A	B	A	B	B	B	A	A	A	A	B	A	A	B	B	B	A	A	A	A
Marker1763525	B	B	B	A	A	B	B	A	B	B	B	A	A	B	A	A	B	B	A	B	A	A	A	A	B	B	A	A	B	A	B	A	B	B	B	A	A	A	A	B	A	A	B	B	B	A	A	A	A
Marker1678174	B	B	B	A	A	B	B	A	B	B	B	A	A	B	A	A	B	B	A	B	A	A	A	A	B	B	A	A	B	A	B	A	B	B	B	A	A	A	A	B	A	A	B	B	B	A	A	A	A
Marker1749788	B	B	B	A	H	B	B	A	B	B	B	A	A	B	A	A	B	B	A	B	A	A	A	A	B	B	A	A	B	A	B	A	B	B	B	A	A	A	A	B	A	A	B	B	B	A	A	A	A
Marker1681984	B	B	B	A	A	B	B	A	B	B	B	A	A	B	A	A	B	B	A	B	A	A	A	A	B	B	A	A	B	A	B	A	B	B	B	A	A	A	A	B	A	A	B	B	B	A	A	A	A
Marker1759565	B	B	B	A	H	B	B	A	B	B	B	A	A	B	A	A	B	B	A	B	A	A	A	A	B	B	A	A	B	A	B	A	B	B	B	A	A	A	A	B	A	A	B	B	B	A	A	A	A
Marker1743751	B	B	B	A	A	B	B	A	B	B	B	A	A	B	A	A	B	B	A	B	A	A	A	A	B	B	A	A	B	A	B	A	B	B	B	A	A	A	A	B	A	A	B	B	B	A	A	A	A
Marker1756525	B	B	B	A	A	B	B	A	B	B	B	A	A	B	A	A	B	B	A	B	A	A	A	A	B	B	A	A	B	A	B	A	B	B	B	A	A	A	A	B	A	A	B	B	B	A	A	A	A
Marker1745411	B	B	B	A	A	B	B	A	B	B	B	A	A	B	A	A	B	B	A	B	A	A	A	A	B	B	A	A	B	A	B	A	B	B	B	A	A	A	A	B	A	A	B	B	B	A	A	A	A
Marker1748068	B	B	B	A	A	B	B	A	B	B	B	A	A	B	A	A	B	B	A	B	A	A	A	A	B	B	A	A	B	A	B	A	B	B	B	A	A	A	A	B	A	A	B	B	B	A	A	A	A
Marker1756016	B	B	B	A	A	B	B	A	B	B	B	A	A	B	A	A	B	B	A	B	A	A	A	A	B	B	A	A	B	A	B	A	B	B	B	A	A	A	A	B	A	A	B	B	B	A	A	A	A
Marker1761043	B	B	B	A	A	B	B	A	B	B	B	A	A	B	A	A	B	B	A	B	A	A	A	A	B	B	A	A	B	A	B	A	B	B	B	A	A	A	A	B	A	A	B	B	B	A	A	A	A
Marker1708873	B	B	B	A	A	B	B	A	B	B	B	A	A	B	A	A	B	B	A	B	A	A	A	A	B	B	A	A	B	A	B	A	B	B	B	A	A	A	A	B	A	A	B	B	B	A	A	A	A
Marker1703826	B	B	B	A	A	B	B	A	B	B	B	A	A	B	A	A	B	B	A	B	A	A	A	A	B	B	A	A	B	A	B	A	B	B	B	A	A	A	A	B	A	A	B	B	B	A	A	A	A
Marker1758252	B	B	B	A	A	B	B	A	B	B	B	A	A	B	A	A	B	B	A	B	A	A	A	A	B	B	A	A	X	A	B	A	B	B	B	A	A	A	A	B	A	A	B	B	B	A	A	A	A
Marker1705511	B	B	B	A	A	B	B	A	B	B	B	A	A	B	A	A	B	B	A	B	A	A	A	A	B	B	A	A	B	A	B	A	X	B	B	A	A	A	A	B	A	A	B	B	B	A	A	A	A
Marker1775426	B	B	B	A	A	B	B	A	B	B	B	A	A	B	A	A	B	B	A	B	A	A	A	A	B	B	A	A	B	A	B	A	B	B	B	A	A	A	A	B	A	A	B	B	B	A	A	A	A
Marker1689199	B	B	B	A	A	B	B	A	B	B	B	A	A	B	A	A	B	B	A	B	A	A	A	A	B	B	A	A	B	A	B	A	B	B	B	A	A	A	A	B	A	A	B	B	B	A	A	A	A
Marker1715013	B	B	B	A	X	B	B	A	B	B	B	A	A	B	A	A	B	B	A	B	A	A	A	A	B	B	A	A	B	A	B	A	B	B	B	A	A	A	A	B	A	A	B	B	B	A	A	A	A
Marker1716087	B	B	B	A	H	B	B	A	B	B	B	A	A	B	A	A	B	B	A	B	A	A	A	A	B	B	A	A	B	A	B	A	B	B	B	A	A	A	A	B	A	A	B	B	B	A	A	A	A
Marker1673452	B	B	B	A	H	B	B	A	B	B	B	A	A	B	A	A	B	B	A	B	A	A	A	A	B	B	A	A	B	A	B	A	B	B	B	A	A	A	A	B	A	A	B	B	B	A	A	A	A
Marker1772667	B	B	B	A	A	B	B	A	B	B	B	A	A	B	A	A	B	B	A	B	A	A	A	A	B	B	A	A	B	A	B	A	B	B	B	A	A	A	A	B	A	A	B	B	B	A	A	A	A
Marker1745682	B	B	B	A	A	B	B	A	B	B	B	A	A	B	A	A	B	B	A	B	A	A	A	A	B	B	A	A	B	A	B	A	B	B	B	A	A	A	A	B	A	A	B	B	B	A	A	A	A
Marker1750461	B	B	B	A	A	B	B	A	B	B	B	A	A	B	A	A	B	B	A	B	A	A	A	A	B	B	A	A	B	A	B	A	B	B	B	A	A	A	A	B	A	A	H	B	B	A	A	A	A
Marker1754199	B	B	B	A	A	B	B	A	B	B	B	A	A	B	A	A	B	B	A	B	A	A	A	A	B	B	A	A	B	A	B	A	B	B	B	A	A	A	A	B	A	A	H	B	B	A	A	A	A
Marker1746162	B	B	B	A	A	B	B	A	B	B	B	A	A	B	A	A	B	B	A	B	A	A	A	A	B	B	A	A	B	A	B	A	B	B	B	A	A	A	A	B	A	A	B	B	B	A	A	A	A
Marker1761018	B	B	B	A	A	B	B	A	B	B	B	A	A	B	A	A	B	B	A	B	A	A	A	A	B	B	A	A	B	A	B	A	B	B	B	A	A	A	A	B	A	A	B	B	B	A	A	A	A
Marker1754894	B	B	B	A	A	B	B	A	B	B	B	A	A	B	A	A	B	B	A	B	A	A	A	A	B	B	A	A	B	A	B	A	B	B	B	A	A	A	A	B	A	A	B	B	B	A	A	A	A
Marker1744290	B	B	B	A	A	B	B	A	B	B	B	A	A	B	A	A	B	B	A	B	A	A	A	A	B	B	A	A	X	A	B	A	B	B	B	A	A	A	A	B	A	A	B	B	B	A	A	A	A
Marker1709435	B	B	B	A	A	B	B	A	B	B	B	A	A	B	A	A	B	B	A	B	A	A	A	A	B	B	A	A	B	A	B	A	B	B	B	A	A	A	A	B	A	A	B	B	B	A	A	A	A
Marker1691560	B	B	B	A	A	B	B	A	B	B	B	A	A	B	A	A	B	B	A	B	A	A	A	A	B	B	A	A	B	A	B	A	B	B	B	A	A	A	A	B	A	A	B	B	B	A	A	A	A
Marker1675025	B	B	B	A	A	B	B	A	B	B	B	A	A	B	A	A	B	B	A	B	A	A	A	A	B	B	A	A	B	A	B	A	B	B	B	A	A	A	A	B	A	A	B	B	B	A	A	A	A
Marker1676770	B	B	B	A	A	B	B	A	B	B	B	A	A	B	A	A	B	B	A	B	A	A	A	A	B	B	A	A	B	A	B	A	B	B	B	A	A	A	A	B	A	A	B	B	B	A	A	A	A
Marker1764138	B	B	B	A	A	B	B	A	B	B	B	A	A	B	A	A	B	B	A	B	A	A	A	A	B	B	A	A	B	A	B	A	B	B	B	A	A	A	A	B	A	A	B	B	B	A	A	A	A
Marker1670015	B	B	B	A	A	B	B	A	B	B	B	A	A	B	A	A	B	B	A	B	A	A	A	A	B	B	A	A	B	A	B	A	B	B	B	A	A	A	A	B	A	A	B	B	B	A	A	A	A
Marker1673324	B	B	B	A	A	B	B	A	B	B	B	A	A	B	A	A	B	B	A	B	A	A	A	A	B	B	A	A	B	A	B	A	B	B	B	A	A	A	A	B	A	A	B	B	B	A	A	A	A
Marker1665869	B	B	B	A	A	B	B	A	B	B	B	A	A	B	A	A	B	B	A	B	A	A	A	A	B	B	A	A	B	A	B	A	B	B	B	A	A	A	A	B	A	A	B	B	B	A	A	A	A
Marker1742167	B	B	B	A	A	B	B	A	B	B	B	A	A	B	A	A	B	B	A	B	A	A	A	A	B	B	A	A	B	A	B	A	B	B	B	A	A	A	A	B	A	A	B	B	B	A	A	A	A
Marker1688389	B	B	B	A	A	B	B	A	B	B	B	A	A	B	A	A	B	B	A	B	A	A	A	A	B	B	A	A	B	A	B	A	B	B	B	A	A	A	A	B	A	A	B	B	B	A	A	A	A
Marker1771262	B	B	B	A	A	B	B	A	B	B	B	A	A	B	A	A	B	B	A	B	A	A	A	A	B	B	A	A	B	A	B	A	B	B	B	A	A	A	A	B	A	A	B	B	B	A	A	A	A
Marker1705339	B	B	B	A	A	B	B	A	B	B	B	A	A	B	A	A	B	B	A	B	A	A	A	A	B	B	A	A	B	A	B	A	B	B	B	A	A	A	A	B	A	A	B	B	B	A	A	A	A
Marker1753967	B	B	B	A	A	B	B	A	B	B	B	A	A	B	A	A	B	B	A	B	A	A	A	A	B	B	A	A	B	A	B	A	B	B	B	A	A	A	A	B	A	A	B	B	B	A	A	A	A
Marker1700096	B	B	B	A	A	B	B	A	B	B	B	A	A	B	A	A	B	B	A	B	A	A	A	A	B	B	A	A	B	A	B	A	B	B	B	A	A	A	A	B	A	A	B	B	B	A	A	A	A
Marker1687231	B	B	B	A	A	B	B	A	B	B	B	A	A	B	A	A	B	B	A	B	A	A	A	A	B	B	A	A	B	A	B	A	B	B	B	A	A	A	A	B	A	A	B	B	B	A	A	A	A
Marker1723718	B	B	B	A	A	B	B	A	B	B	B	A	A	B	A	A	B	B	A	B	A	A	A	A	B	B	A	A	B	A	B	A	B	B	B	A	A	A	A	B	A	A	B	B	B	A	A	A	A
Marker1770532	B	B	B	A	A	B	B	A	B	B	B	A	A	B	A	A	B	B	A	B	A	A	A	A	B	B	A	A	B	A	B	A	B	B	B	A	A	A	A	B	A	A	H	B	B	A	A	A	A
Marker1726659	B	B	B	A	A	B	B	A	B	B	B	A	A	B	A	A	B	B	A	B	A	A	A	A	B	B	A	A	B	A	B	A	B	B	B	A	A	A	A	B	A	A	H	B	B	A	A	A	A
Marker1716357	B	B	B	A	A	B	B	A	B	B	B	A	A	B	A	A	B	B	A	B	A	A	A	A	B	B	A	A	B	A	B	A	B	B	B	A	A	A	A	B	A	A	H	B	B	A	A	A	A
Marker1753325	B	B	B	A	A	B	B	A	B	B	B	A	A	B	A	A	B	B	A	B	A	A	A	A	B	B	A	A	B	A	B	A	B	B	B	A	A	A	A	B	A	A	H	B	B	A	A	A	A
Marker1663415	B	B	B	A	A	B	B	A	B	B	B	A	A	B	A	A	B	B	A	B	A	A	A	A	B	B	A	A	B	A	B	A	B	B	B	A	A	A	A	B	A	A	X	B	B	A	A	A	A
Marker1699054	B	B	B	A	X	B	B	A	B	B	B	A	A	B	A	A	B	B	A	B	A	A	A	A	B	B	A	A	B	A	B	A	B	B	B	A	A	A	A	B	A	A	H	B	B	A	A	A	A
Marker1672903	B	B	B	A	A	B	B	A	B	B	B	A	A	B	A	A	B	B	A	B	A	A	A	A	B	B	A	A	B	A	B	A	B	B	B	A	A	A	A	B	A	A	H	B	B	A	A	A	A
Marker1768776	B	B	B	A	A	B	B	A	B	B	B	A	A	B	A	A	B	B	A	B	A	A	A	A	B	B	A	A	B	A	B	A	B	B	B	A	A	A	A	B	A	A	H	B	B	A	A	A	A
Marker1721526	B	B	B	A	A	B	B	A	B	B	B	A	A	B	A	A	B	B	A	B	A	A	A	A	B	B	A	A	B	A	B	A	B	B	B	A	A	A	A	B	A	A	H	B	B	A	A	A	A
Marker1696178	B	B	B	A	A	B	B	A	B	B	B	A	A	B	A	A	B	B	A	B	A	A	A	A	B	B	A	A	B	A	B	A	B	B	B	A	B	A	A	B	A	A	B	B	B	A	A	A	A
Marker1749602	B	B	B	A	A	B	B	A	B	B	B	A	A	B	A	A	B	B	A	B	A	A	A	A	B	B	A	A	B	A	B	A	B	B	B	A	B	A	A	B	A	A	B	B	B	A	A	A	A
Marker1755291	B	B	B	A	A	B	B	A	B	B	B	A	A	B	A	A	B	B	A	B	A	A	A	A	B	B	A	A	B	A	B	A	B	B	B	A	B	A	A	B	A	A	B	B	B	A	A	A	A
Marker1682157	B	B	B	A	A	B	B	A	B	B	B	A	A	B	A	A	B	B	A	B	A	A	A	A	B	B	A	A	B	A	B	A	B	B	B	A	B	A	A	B	A	A	B	B	B	A	A	A	A
Marker1725120	B	B	B	A	A	B	B	A	B	B	B	A	A	B	A	A	B	B	A	B	A	A	A	A	B	B	A	A	B	A	B	A	B	B	B	A	B	A	A	B	A	A	H	B	B	A	A	A	A
Marker1707039	B	B	B	A	A	B	B	A	B	B	B	A	A	B	A	A	B	B	A	B	A	A	A	A	B	B	A	A	X	A	B	A	B	B	B	A	B	A	A	B	A	A	X	B	B	A	A	A	A
Marker1740528	B	B	B	A	A	B	B	A	B	B	B	A	A	B	A	A	B	B	A	B	A	A	A	A	B	B	A	A	B	A	B	A	B	B	B	A	B	A	A	B	A	A	H	B	B	A	A	A	A
Marker1711416	B	B	B	A	A	B	B	A	B	B	B	A	A	B	A	A	B	B	A	B	A	A	A	A	B	B	A	A	B	A	B	A	B	B	B	A	B	A	A	B	A	A	H	B	B	A	A	A	A
Marker1765551	B	B	B	A	A	B	B	A	B	B	B	A	A	B	A	A	B	B	A	B	A	A	A	A	B	B	A	A	B	A	B	A	B	B	B	X	B	A	A	B	A	A	X	B	B	A	A	A	A
Marker1712919	B	B	B	A	A	B	B	A	B	B	B	A	A	B	A	A	B	B	A	B	A	A	A	A	B	B	A	A	B	A	B	A	B	B	B	A	B	A	A	B	A	A	X	B	B	A	A	A	A
Marker1725308	B	B	B	A	A	B	B	A	B	B	B	A	A	B	A	A	B	B	A	B	A	A	A	A	B	B	A	A	B	A	B	A	B	B	B	A	B	A	A	B	A	A	B	B	B	A	A	A	A
Marker1748622	B	B	B	A	A	B	B	A	B	B	B	A	A	B	A	A	B	B	A	B	A	A	A	A	B	B	A	A	B	A	B	A	B	B	B	A	X	A	A	B	A	A	B	B	B	A	A	A	A
Marker1697591	B	B	B	A	H	B	B	A	B	B	B	A	A	B	A	A	B	B	A	B	A	A	A	A	B	B	A	A	B	A	B	A	B	B	B	X	B	A	A	B	A	A	B	B	B	A	A	A	A
Marker1775154	B	B	B	A	A	B	B	A	B	B	B	A	A	B	A	A	B	B	A	B	A	A	A	A	B	B	A	A	B	A	B	A	B	B	B	A	B	A	A	B	A	A	B	B	B	A	A	A	A
Marker1692510	B	B	B	A	A	B	B	A	B	B	B	A	A	B	A	A	B	B	A	B	A	A	A	A	B	B	A	A	B	A	B	A	B	B	B	A	B	A	A	B	A	A	B	B	B	A	A	A	A
Marker1758498	B	B	B	A	A	B	B	A	B	B	B	A	A	B	A	A	B	B	A	B	A	A	A	A	B	B	A	A	B	A	B	A	B	B	B	A	B	A	A	B	A	A	B	B	B	A	A	A	A
Marker1706068	B	B	B	A	A	B	B	A	B	B	B	A	A	B	A	A	B	B	A	B	A	A	A	A	B	B	A	A	B	A	B	A	B	B	B	A	B	A	A	B	A	A	B	B	B	A	A	A	A
Marker1748518	B	B	B	A	H	B	B	A	B	B	B	A	A	B	A	A	B	B	A	B	A	A	A	A	X	B	A	A	B	A	B	A	B	B	B	A	B	A	A	B	A	A	B	B	B	A	A	A	A
Marker1756631	B	B	B	A	X	B	B	A	B	B	B	A	A	B	A	A	B	B	A	B	A	A	A	A	B	B	A	A	B	A	B	A	B	B	B	A	B	A	A	B	A	A	B	B	B	A	A	A	A
Marker1694747	B	B	B	A	X	B	B	A	B	B	B	A	A	B	A	A	B	B	A	B	A	A	A	A	B	B	A	A	B	A	B	A	B	B	B	A	B	A	A	B	A	A	B	B	B	A	A	A	A
Marker1771882	B	B	B	A	A	B	B	A	B	B	B	A	A	B	A	A	B	B	A	B	A	A	A	A	B	B	A	A	B	A	B	A	B	B	B	A	B	A	A	B	A	A	B	B	B	A	A	A	A
Marker1719796	B	B	B	A	A	B	B	A	B	B	B	A	A	B	A	A	B	B	A	B	A	A	A	A	B	B	A	A	B	A	B	A	B	B	B	A	B	A	A	B	A	A	B	B	B	A	A	A	A
Marker1775060	B	B	B	A	A	B	B	A	B	B	B	A	A	B	A	A	B	B	A	B	A	A	A	A	B	B	A	A	B	A	B	A	B	B	B	X	B	A	A	B	A	A	B	B	B	A	A	A	A
Marker1667016	B	B	B	A	A	B	B	A	B	B	B	A	A	B	A	A	B	B	A	B	A	A	A	A	B	B	A	A	B	A	B	A	B	B	B	X	B	A	A	B	A	A	X	B	B	A	A	A	A
Marker1758639	B	B	B	A	A	B	B	A	B	B	B	A	A	B	A	A	B	B	A	B	A	A	A	A	B	B	A	A	B	A	B	A	B	B	B	A	B	A	A	B	A	A	B	B	B	A	A	A	A
Marker1718541	B	B	B	A	A	B	B	A	B	B	B	A	A	B	A	A	B	B	A	B	A	A	A	A	B	B	A	A	B	A	B	A	B	B	B	A	B	A	A	B	A	A	B	B	B	A	A	A	A
Marker1666690	B	B	B	A	H	B	B	A	B	B	B	A	A	B	A	A	B	B	A	B	A	A	A	A	B	B	A	A	B	A	B	A	B	B	B	A	B	A	A	B	A	A	B	B	B	A	A	A	A
Marker1683212	B	B	B	A	H	B	B	A	B	B	B	A	A	B	A	A	B	B	A	B	A	A	A	A	B	B	A	A	B	A	B	A	B	B	B	A	B	A	A	B	A	A	B	B	B	A	A	A	A
Marker1768823	B	B	B	A	H	B	B	A	B	B	B	A	A	B	A	A	B	B	A	B	A	A	A	A	B	B	A	A	B	A	B	A	B	B	B	A	B	A	A	B	A	A	B	B	B	A	A	A	A
Marker1679327	B	B	B	A	A	B	B	A	B	B	B	A	A	B	A	A	B	B	A	B	A	A	A	A	B	B	A	A	B	A	B	A	B	B	B	A	B	A	A	B	A	A	B	B	B	A	A	A	A
Marker1731674	B	B	B	A	A	B	B	A	B	B	B	A	A	B	A	A	B	B	A	B	A	A	A	A	B	B	A	A	B	A	B	A	B	B	B	A	B	A	A	B	A	A	B	B	B	A	A	A	A
Marker1715154	B	B	B	A	A	B	B	A	B	B	B	A	A	B	A	A	B	B	A	B	A	A	A	A	B	B	A	A	X	A	B	A	B	B	B	A	B	A	A	B	A	A	H	B	B	A	A	A	A
Marker1761532	B	B	B	A	A	B	B	A	B	B	B	A	A	B	A	A	B	B	A	B	A	A	A	A	B	B	A	A	A	A	B	A	B	B	B	A	B	A	A	B	A	A	B	B	B	A	A	A	A
Marker1725221	B	B	B	A	A	B	B	A	B	B	B	A	A	B	A	A	B	B	A	B	A	A	A	A	B	B	A	A	A	A	B	A	B	B	B	A	B	A	A	B	A	A	B	B	B	A	A	A	A
Marker1665481	B	B	B	A	A	B	B	A	B	B	B	A	A	B	A	A	B	B	A	B	A	A	A	A	B	B	A	A	A	A	B	A	B	B	B	A	B	A	A	B	A	A	B	B	B	A	A	A	A
Marker1722523	B	B	B	A	H	B	B	A	B	B	B	A	A	B	A	A	B	B	A	B	A	A	A	A	B	B	A	A	A	A	B	A	B	B	B	A	B	A	A	B	A	A	B	B	B	A	A	A	A
Marker1743738	B	B	B	A	H	B	B	A	B	B	B	A	A	B	A	A	B	B	A	B	A	A	A	A	B	B	A	A	A	A	B	A	B	B	B	A	B	A	A	B	A	A	B	B	B	A	A	A	A
Marker1666072	B	B	B	A	H	B	B	A	B	B	B	A	A	B	A	A	B	B	A	B	A	A	A	A	B	B	A	A	A	A	B	A	B	B	B	A	B	A	A	B	A	A	B	B	B	A	A	A	A
Marker1731363	B	B	B	A	A	B	B	A	B	B	B	A	A	B	A	A	B	B	A	B	A	A	A	A	B	B	A	A	A	A	B	A	B	B	B	A	B	A	A	B	A	A	B	B	B	A	A	A	A
Marker1755840	B	B	B	A	A	B	B	A	B	B	B	A	A	B	A	A	B	B	A	B	A	A	A	A	B	B	A	A	A	A	B	A	B	B	B	A	A	A	A	B	A	A	B	B	B	A	A	A	A
Marker1762499	B	B	B	A	A	B	B	A	B	B	B	A	A	B	A	A	B	B	A	B	A	A	A	A	B	B	A	A	A	A	B	A	B	B	B	A	A	A	A	B	A	A	B	B	B	A	A	A	A
Marker1754697	B	B	B	A	X	B	B	A	B	B	B	A	A	B	A	A	B	B	A	B	A	A	A	A	B	B	A	A	A	A	B	A	B	B	B	A	A	A	A	B	A	A	B	B	B	A	A	A	A
Marker1724691	B	B	B	A	H	B	B	A	B	B	B	A	A	B	A	A	B	B	A	B	A	A	A	A	B	B	A	A	X	A	B	A	B	B	B	A	A	A	A	B	A	A	B	B	B	A	A	A	A
Marker1767890	B	B	B	A	H	B	B	A	B	B	B	A	A	B	A	A	B	B	A	B	A	A	A	A	B	B	A	A	B	A	B	A	B	B	B	A	A	A	A	B	A	A	B	B	B	A	A	A	A
Marker1713716	B	B	B	A	A	B	B	A	B	B	B	A	A	B	A	A	B	B	A	B	A	A	A	A	B	B	A	A	B	A	B	A	B	B	B	A	A	A	A	B	A	A	B	B	B	A	A	A	A
Marker1737884	B	B	B	A	A	B	B	A	B	B	B	A	A	B	A	A	B	B	A	B	A	A	A	A	B	B	A	A	B	A	B	A	B	B	B	A	A	A	A	B	A	A	B	B	B	A	A	A	A
Marker1676472	B	B	B	A	A	B	B	A	B	B	B	A	A	B	A	A	B	B	A	B	A	A	A	A	B	B	A	A	B	A	B	A	B	B	B	A	A	A	A	B	A	A	B	B	B	A	A	A	A
Marker1667712	B	B	B	A	A	B	B	A	B	B	B	A	A	B	A	A	B	B	A	B	A	A	A	A	B	B	A	A	B	A	B	A	B	B	B	A	A	A	A	B	A	A	B	B	B	A	A	A	A
Marker1681239	B	B	B	A	A	B	B	A	B	B	B	A	A	B	A	A	B	B	A	B	A	A	A	A	B	B	A	A	X	A	B	A	B	B	B	A	X	A	A	B	A	A	B	B	B	A	A	A	A
Marker1680971	B	B	B	A	A	B	B	A	B	B	B	A	A	B	A	A	B	B	A	B	A	A	A	A	B	B	A	A	B	A	B	A	B	B	B	A	B	A	A	B	A	A	B	B	B	A	A	A	A
Marker1762850	B	B	B	A	A	B	B	A	B	B	B	A	A	B	A	A	B	B	A	B	A	A	A	A	B	B	A	A	X	A	B	A	X	B	B	A	B	A	A	B	A	A	B	B	B	A	A	A	A
Marker1759630	B	B	B	A	A	B	B	A	B	B	B	A	A	B	A	A	B	B	A	B	A	A	A	A	B	B	A	A	X	A	B	A	B	B	B	A	B	A	A	B	A	A	B	B	B	A	A	A	A
Marker1711273	B	B	B	A	A	B	B	A	B	B	B	A	A	B	A	A	B	B	A	B	A	A	A	A	B	B	A	A	X	A	B	A	X	B	B	A	B	A	A	B	A	A	B	B	B	A	A	A	A
Marker1757719	B	B	B	A	A	B	B	A	B	B	B	A	A	B	A	A	B	B	A	B	A	A	A	A	B	B	A	A	B	A	B	A	B	B	B	A	H	A	A	B	A	A	X	B	B	A	A	A	A
Marker1678413	B	B	B	A	X	B	B	A	B	B	B	A	A	B	A	A	B	B	A	B	A	A	A	A	B	B	A	A	B	A	B	A	B	B	B	A	B	A	A	B	A	A	B	B	B	A	A	A	A
Marker1778241	B	B	B	A	A	B	B	A	B	B	B	A	A	B	A	A	B	B	A	B	A	A	A	A	B	B	A	A	B	A	B	A	X	B	B	A	B	A	A	B	A	A	B	B	B	A	A	A	A
Marker1734900	B	B	B	A	A	B	B	A	B	B	B	A	A	B	A	A	B	B	A	B	A	A	A	A	B	B	A	A	B	A	B	A	B	B	B	A	B	A	A	B	A	A	B	B	B	A	A	A	A
Marker1754468	B	B	B	A	A	B	B	A	B	B	B	A	A	B	A	A	B	B	A	B	A	A	A	A	B	B	A	A	B	A	B	A	B	B	B	A	B	A	A	B	A	A	B	B	B	A	A	A	A
Marker1673124	B	B	B	A	A	B	B	A	B	B	B	A	A	B	A	A	B	B	A	B	A	A	A	A	B	B	A	A	B	A	B	A	B	B	B	A	B	A	A	B	A	A	X	B	B	A	A	A	A
Marker1675286	B	B	B	A	A	B	B	A	B	B	B	A	A	B	A	A	B	B	A	B	A	A	A	A	B	B	A	A	B	A	B	A	B	B	B	A	B	A	A	B	A	A	B	B	B	A	A	A	A
Marker1767172	B	B	B	A	A	B	B	A	B	B	B	A	A	B	A	A	B	B	A	B	A	A	A	A	B	B	A	A	B	A	B	A	B	B	B	A	B	A	A	B	A	A	B	B	B	A	A	A	A
Marker1731996	B	B	B	A	A	B	B	A	B	B	B	A	A	B	A	A	B	B	A	B	A	A	A	A	B	B	A	A	B	A	B	A	B	B	B	A	B	A	A	B	A	A	B	B	B	A	A	A	A
Marker1710568	B	B	B	A	H	B	B	A	B	B	B	A	A	B	A	A	B	B	A	B	A	A	A	A	B	B	A	A	B	A	B	A	B	B	B	A	H	A	A	B	A	A	B	B	B	A	A	A	A
Marker1692774	B	B	B	A	B	B	B	A	B	B	B	A	A	B	A	A	B	B	A	B	A	A	A	A	X	B	A	A	B	A	B	A	B	B	B	A	B	A	A	B	A	A	H	B	B	A	A	A	A
Marker1674664	B	B	B	A	B	B	B	A	B	B	B	A	A	B	A	A	B	B	A	B	A	A	A	A	B	B	A	A	B	A	B	A	B	B	B	A	B	A	A	B	A	A	B	B	B	A	A	A	A
Marker1684715	B	B	B	A	B	B	B	A	B	B	B	A	A	B	A	A	B	B	A	B	A	A	A	A	B	B	A	A	B	A	B	A	B	B	B	A	X	A	A	B	A	A	B	B	B	A	A	A	A
Marker1701146	B	B	B	A	X	B	B	A	B	B	B	A	A	B	A	A	B	B	A	B	A	A	A	A	B	B	A	A	B	A	B	A	B	B	B	A	A	A	A	B	A	A	B	B	B	A	A	A	A
Marker1765534	B	B	B	A	B	B	B	A	B	B	B	A	A	B	A	A	B	B	A	B	A	A	A	A	B	B	A	A	B	A	B	A	X	B	B	A	A	A	A	B	A	A	B	B	B	A	A	A	A
Marker1775038	B	B	B	A	B	B	B	A	B	B	B	A	A	B	A	A	B	B	A	B	A	A	A	A	B	B	A	A	B	A	B	A	B	B	B	A	A	A	A	B	A	A	B	B	B	A	A	A	A
Marker1754641	B	B	B	A	X	B	B	A	B	B	B	A	A	B	A	A	B	B	A	B	A	A	A	A	B	B	A	A	B	A	B	A	B	B	B	A	B	A	A	B	A	A	B	B	B	A	A	A	A
Marker1718709	B	B	B	A	X	B	B	A	B	B	B	A	A	B	A	A	B	B	A	B	A	A	A	A	B	B	A	A	B	A	B	A	X	B	B	A	B	A	A	B	A	A	B	B	B	A	A	A	A
Marker1725533	B	B	B	A	X	B	B	A	B	B	B	A	A	B	A	A	B	B	A	B	A	A	A	A	B	B	A	A	B	A	B	A	B	B	B	A	X	A	A	B	A	A	B	B	B	A	A	A	A
Marker1756185	B	B	B	A	H	B	B	A	B	B	B	A	A	B	A	A	B	B	A	B	A	A	A	A	B	B	A	A	B	A	B	A	B	B	B	A	H	A	A	B	A	A	B	B	B	A	A	A	A
Marker1749147	B	B	B	A	B	B	B	A	B	B	B	A	A	B	A	A	B	B	A	B	A	A	A	A	B	B	A	A	B	A	B	A	B	B	B	A	B	A	A	B	A	A	B	B	B	A	A	A	A
Marker1722168	B	B	B	A	B	B	B	A	B	B	B	A	A	B	A	A	B	B	A	B	A	A	A	A	B	B	A	A	B	A	B	A	B	B	B	A	B	A	A	B	A	A	B	B	B	A	A	A	A
Marker1736876	B	B	B	A	H	B	B	A	B	B	B	A	A	B	A	A	B	B	A	B	A	A	A	A	B	B	A	A	B	A	B	A	B	B	B	A	H	A	A	B	A	A	B	B	B	A	A	A	A
Marker1702949	B	B	B	A	H	B	B	A	B	B	B	A	A	B	A	A	B	B	A	B	A	A	A	A	B	B	A	A	B	A	B	A	B	B	B	A	X	A	A	B	A	A	B	B	B	A	A	A	A
Marker1711493	B	B	B	A	X	B	B	A	B	B	B	A	A	B	A	A	B	B	A	B	A	A	A	A	B	B	A	A	B	A	B	A	B	B	B	A	B	A	A	B	A	A	B	B	B	A	A	A	A
Marker1664399	B	B	B	A	H	B	B	A	B	B	B	A	A	B	A	A	B	B	A	B	A	A	A	A	B	B	A	A	B	A	B	A	B	B	B	A	H	A	A	B	A	A	B	B	B	A	A	A	A
Marker1670258	B	B	B	A	B	B	B	A	B	B	B	A	A	B	A	A	B	B	A	B	A	A	A	A	B	B	A	A	B	A	B	A	B	B	B	A	B	A	A	B	A	A	B	B	B	A	A	A	A
Marker1775215	B	B	B	A	X	B	B	A	B	B	B	A	A	B	A	A	B	B	A	B	A	A	A	A	B	B	A	A	B	A	B	A	B	B	B	A	B	A	A	B	A	A	H	B	B	A	A	A	A
Marker1686003	B	B	B	A	A	B	B	A	B	B	B	A	A	B	A	A	B	B	A	B	A	A	A	A	B	B	A	A	B	A	B	A	B	B	B	A	B	A	A	B	A	A	H	B	B	A	A	A	A
Marker1772654	B	B	B	A	A	B	B	A	B	B	B	A	A	B	A	A	B	B	A	B	A	A	A	A	B	B	A	A	B	A	B	A	B	B	B	A	B	A	A	B	A	A	H	B	B	A	A	A	A
Marker1719574	B	B	B	A	A	B	B	A	B	B	B	A	A	B	A	A	B	B	A	B	A	A	A	A	B	B	A	A	B	A	B	A	B	B	B	A	B	A	A	B	A	A	X	B	B	A	A	A	A
Marker1746950	B	B	B	A	A	B	B	A	B	B	B	A	A	B	A	A	B	B	A	B	A	A	A	A	B	B	A	A	B	A	B	A	B	B	B	A	B	A	A	B	A	A	X	B	B	A	A	A	A
Marker1720728	B	B	B	A	X	B	B	A	B	B	B	A	A	B	A	A	B	B	A	B	A	A	A	A	B	B	A	A	B	A	B	A	B	B	B	A	B	A	A	B	A	A	H	B	B	A	A	A	A
Marker1772010	B	B	B	A	A	B	B	A	B	B	B	A	A	B	A	A	B	B	A	B	A	A	A	A	B	B	A	A	B	A	B	A	B	B	B	A	B	A	A	B	A	A	H	B	B	A	A	A	A
Marker1748632	B	B	B	A	A	B	B	A	B	B	B	A	A	B	A	A	B	B	A	B	A	A	A	A	B	B	A	A	B	A	B	A	B	B	B	A	B	A	A	B	A	A	B	B	B	A	A	A	A
Marker1768807	B	B	B	A	A	B	B	A	B	B	B	A	A	B	A	A	B	B	A	B	A	A	A	A	B	B	A	A	B	A	B	A	B	B	B	A	B	A	A	B	A	A	B	B	B	A	A	A	A
Marker1676548	B	B	B	A	A	B	B	A	B	B	B	A	A	B	A	A	B	B	A	B	A	A	A	A	B	B	A	A	B	A	B	A	B	B	B	A	B	A	A	B	A	A	B	B	B	A	A	A	A
Marker1686288	B	B	B	A	X	B	B	A	B	B	B	A	A	B	A	A	B	B	A	B	A	A	A	A	B	B	A	A	B	A	B	A	B	B	B	A	B	A	A	B	A	A	B	B	B	A	A	A	A
Marker1714677	B	B	B	A	A	B	B	A	B	B	B	A	A	B	A	A	B	B	A	B	A	A	A	A	B	B	A	A	B	A	B	A	B	B	B	A	B	A	A	B	A	A	B	B	B	A	A	A	A
Marker1768041	B	B	B	A	A	B	B	A	B	B	B	A	A	B	A	A	B	B	A	B	A	A	A	A	B	B	A	A	B	A	B	A	B	B	B	A	B	A	A	B	A	A	B	B	B	A	A	A	A
Marker1700565	B	B	B	A	A	B	B	A	B	B	B	A	A	B	A	A	B	B	A	B	A	A	A	A	B	B	A	A	B	A	B	A	X	B	B	A	B	A	A	B	A	A	B	B	B	A	A	A	A
Marker1736244	B	B	B	A	X	B	B	A	B	B	B	A	A	B	A	A	B	B	A	B	A	A	A	A	B	B	A	A	B	A	B	A	B	B	B	A	B	A	A	B	A	A	B	B	B	A	A	A	A
Marker1758362	B	B	B	A	X	B	B	A	B	B	B	A	A	B	A	A	B	B	A	B	A	A	A	A	B	B	A	A	B	A	B	A	B	B	B	A	B	A	A	B	A	A	B	B	B	A	A	A	A
Marker1670819	B	B	B	A	A	B	B	A	B	B	B	A	A	B	A	A	B	B	A	B	A	A	A	A	B	B	A	A	B	A	B	A	B	B	B	A	B	A	A	B	A	A	B	B	B	A	A	A	A
Marker1739253	B	B	B	A	A	B	B	A	B	B	B	A	A	B	A	A	B	B	A	B	A	A	A	A	B	B	A	A	B	A	B	A	B	B	B	A	B	A	A	B	A	A	B	B	B	A	A	A	A
Marker1763324	B	B	B	A	A	B	B	A	B	B	B	A	A	B	A	A	B	B	A	B	A	A	A	A	B	B	A	A	B	A	B	A	X	B	B	A	B	A	A	B	A	A	B	B	B	A	A	A	A
Marker1727670	B	B	B	A	A	B	B	A	B	B	B	A	A	B	A	A	B	B	A	B	A	A	A	A	X	B	A	A	B	A	B	A	B	B	B	A	B	A	A	B	A	A	B	B	B	A	A	A	A
Marker1750901	B	B	B	A	A	B	B	A	B	B	B	A	A	B	A	A	B	B	A	B	A	A	A	A	B	B	A	A	B	A	B	A	B	B	B	A	B	A	A	B	A	A	B	B	B	A	A	A	A
Marker1688612	B	B	B	A	A	B	B	A	B	B	B	A	A	B	A	A	B	B	A	B	A	A	A	A	B	B	A	A	B	A	B	A	X	B	B	A	B	A	A	B	A	A	B	B	B	A	A	A	A
Marker1682996	B	B	B	A	A	B	B	A	B	B	B	A	A	B	A	A	B	B	A	B	A	A	A	A	B	B	A	A	B	A	B	A	B	B	B	A	B	A	A	B	A	A	B	B	B	A	A	A	A
Marker1745030	B	B	B	A	A	B	B	A	B	B	B	A	A	B	A	A	B	B	A	B	A	A	A	A	X	B	A	A	B	A	B	A	B	B	B	A	B	A	A	B	A	A	B	B	B	A	A	A	A
Marker1713633	B	B	B	A	A	B	B	A	B	B	B	A	A	B	A	A	B	B	A	B	A	A	A	A	X	B	A	A	B	A	B	A	B	B	B	A	B	A	A	B	A	A	B	B	B	A	A	A	A
Marker1683349	B	B	B	A	A	B	B	A	B	B	B	A	A	B	A	A	B	B	A	B	A	A	A	A	B	B	A	A	B	A	B	A	B	B	B	A	B	A	A	B	A	A	X	B	B	A	A	A	A
Marker1720430	B	B	B	A	X	B	B	A	B	B	B	A	A	B	A	A	B	B	A	B	A	A	A	A	X	B	A	A	B	A	B	A	B	B	B	A	B	A	A	B	A	A	X	B	B	A	A	A	A
Marker1680205	B	B	B	A	A	B	B	A	B	B	B	A	A	B	A	A	B	B	A	B	A	A	A	A	X	B	A	A	B	A	B	A	B	B	B	A	B	A	A	B	A	A	B	B	B	A	A	A	A
Marker1678968	B	B	B	A	A	B	B	A	B	B	B	A	A	B	A	A	B	B	A	B	A	A	A	A	B	B	A	A	B	A	B	A	B	B	B	A	B	A	A	B	A	A	H	B	B	A	A	A	A
Marker1688934	B	B	B	A	A	B	B	A	B	B	B	A	A	B	A	A	B	B	A	B	A	A	A	A	B	B	A	A	B	A	B	A	B	B	B	A	B	A	A	B	A	A	B	B	B	A	A	A	A
Marker1759263	B	B	B	A	A	B	B	A	B	B	B	A	A	B	A	A	B	B	A	B	A	A	A	A	B	B	A	A	B	A	B	A	B	B	B	A	B	A	A	B	A	A	B	B	B	A	A	A	A
Marker1684029	B	B	B	A	X	B	B	A	B	B	B	A	A	B	A	A	B	B	A	B	A	A	A	A	B	B	A	A	B	A	B	A	B	B	B	A	B	A	A	B	A	A	H	B	B	A	A	A	A
Marker1705926	B	B	B	A	A	B	B	A	B	B	B	A	A	B	A	A	B	B	A	B	A	A	A	A	B	B	A	A	B	A	B	A	B	B	B	A	B	A	A	B	A	A	B	B	B	A	A	A	A
Marker1765566	B	B	B	A	A	B	B	A	B	B	B	A	A	B	A	A	B	B	A	B	A	A	A	A	B	B	A	A	B	A	B	A	B	B	B	A	B	A	A	B	A	A	B	B	B	A	A	A	A
Marker1772507	B	B	B	A	A	B	B	A	B	B	B	A	A	B	A	A	B	B	A	B	A	A	A	A	B	B	A	A	B	A	B	A	B	B	B	A	B	A	A	B	A	A	B	B	B	A	A	A	A
Marker1678678	B	B	B	A	A	B	B	A	B	B	B	A	A	B	A	A	B	B	A	B	A	A	A	A	B	B	A	A	B	A	B	A	X	B	B	A	B	A	A	B	A	A	B	B	B	A	A	A	A
Marker1696716	B	B	B	A	A	B	B	A	B	B	B	A	A	B	A	A	B	B	A	B	A	A	A	A	B	B	A	A	B	A	B	A	B	B	B	A	H	A	A	B	A	A	B	B	B	A	A	A	A
Marker1737198	B	B	B	A	A	B	B	A	B	B	B	A	A	B	A	A	B	B	A	B	A	A	A	A	B	B	A	A	B	A	B	A	X	B	B	A	H	A	A	B	A	A	B	B	B	A	A	A	A
Marker1770243	B	B	B	A	A	B	B	A	B	B	B	A	A	B	A	A	B	B	A	B	A	A	A	A	B	B	A	A	B	A	B	A	B	B	B	A	H	A	A	B	A	A	B	B	B	A	A	A	A
Marker1766321	B	B	B	A	A	B	B	A	B	B	B	A	A	B	A	A	B	B	A	B	A	A	A	A	B	B	A	A	B	A	B	A	B	B	B	A	H	A	A	B	A	A	B	B	B	A	A	A	A
Marker1707882	B	B	B	A	A	B	B	A	B	B	B	A	A	B	A	A	B	B	A	B	A	A	A	A	B	B	A	A	B	A	B	A	B	B	B	A	H	A	A	B	A	A	B	B	B	A	A	A	A
Marker1696625	B	B	B	A	A	B	B	A	B	B	B	A	A	B	A	A	B	B	A	B	A	A	A	A	X	B	A	A	B	A	B	A	B	B	B	A	B	A	A	B	A	A	B	B	B	A	A	A	A
Marker1676177	B	B	B	A	A	B	B	A	B	B	B	A	A	B	A	A	B	B	A	B	A	A	A	A	X	B	A	A	B	A	B	A	B	B	B	A	B	A	A	B	A	A	B	B	B	A	A	A	A
Marker1750386	B	B	B	A	A	B	B	A	B	B	B	A	A	B	A	A	B	B	A	B	A	A	A	A	X	B	A	A	B	A	B	A	X	B	B	A	B	A	A	B	A	A	B	B	B	A	A	A	A
Marker1665963	B	B	B	A	A	B	B	A	B	B	B	A	A	B	A	A	B	B	A	B	A	A	A	A	X	B	A	A	B	A	B	A	X	B	B	A	X	A	A	B	A	A	B	B	B	A	A	A	A
Marker1706398	B	B	B	A	A	B	B	A	B	B	B	A	A	B	A	A	B	B	A	B	A	A	A	A	B	B	A	A	B	A	B	A	B	B	B	A	B	A	A	B	A	A	B	B	B	A	A	A	A
Marker1736881	B	B	B	A	A	B	B	A	B	B	B	A	A	B	A	A	B	B	A	B	A	A	A	A	B	B	A	A	B	A	B	A	B	B	B	A	X	A	A	B	A	A	B	B	B	A	A	A	A
Marker1673346	B	B	B	A	A	B	B	A	B	B	B	A	A	B	A	A	B	B	A	B	A	A	A	A	X	B	A	A	B	A	B	A	X	B	B	A	B	A	A	B	A	A	B	B	B	A	A	A	A
Marker1716479	B	B	B	A	A	B	B	A	B	B	B	A	A	B	A	A	B	B	A	B	A	A	A	A	B	B	A	A	B	A	B	A	B	B	B	A	B	A	A	B	A	A	B	B	B	A	A	A	A
Marker1728573	B	B	B	A	A	B	B	A	B	B	B	A	A	B	A	A	B	B	A	B	A	A	A	A	B	B	A	A	B	A	B	A	B	B	B	A	B	A	A	B	A	A	B	B	B	A	A	A	A
Marker1740948	B	B	B	A	A	B	B	A	B	B	B	A	A	B	A	A	B	B	A	B	A	A	A	A	B	B	A	A	B	A	B	A	B	B	B	A	B	A	A	B	A	A	B	B	B	A	A	A	A
Marker1687441	B	B	B	A	A	B	B	A	B	B	B	A	A	B	A	A	B	B	A	B	A	A	A	A	B	B	A	A	B	A	B	A	B	B	B	A	B	A	A	B	A	A	B	B	B	A	A	A	A
Marker1693010	B	B	B	A	A	B	B	A	B	B	B	A	A	B	A	A	B	B	A	B	A	A	A	A	B	B	A	A	B	A	B	A	B	B	B	A	B	A	A	B	A	A	B	B	B	A	A	A	A
Marker1688537	B	B	B	A	A	B	B	A	B	B	B	A	A	B	A	A	B	B	A	B	A	A	A	A	B	B	A	A	B	A	B	A	B	B	B	A	B	A	A	B	A	A	B	B	B	A	A	A	A
Marker1711296	B	B	B	A	A	B	B	A	B	B	B	A	A	B	A	A	B	B	A	B	A	A	A	A	B	B	A	A	B	A	B	A	B	B	B	A	B	A	A	B	A	A	B	B	B	A	A	A	A
Marker1713895	B	B	B	A	A	B	B	A	B	B	B	A	A	B	A	A	B	B	A	B	A	A	A	A	B	B	A	A	B	A	B	A	B	B	B	A	B	A	A	B	A	A	B	B	B	A	A	A	A
Marker1681543	B	B	B	A	A	B	B	A	B	B	B	A	A	B	A	A	B	B	A	B	A	A	A	A	B	B	A	A	B	A	B	A	B	B	B	A	B	A	A	B	A	A	B	B	B	A	A	A	A
Marker1682507	B	B	B	A	A	B	B	A	B	B	B	A	A	B	A	A	B	B	A	B	A	A	A	A	B	B	A	A	B	A	B	A	B	B	B	A	B	A	A	B	A	A	B	B	B	A	A	A	A
Marker1758251	B	B	B	A	X	B	B	A	B	B	B	A	A	B	A	A	B	B	A	B	A	A	A	A	B	B	A	A	B	A	B	A	B	B	B	A	B	A	A	B	A	A	B	B	B	A	A	A	A
Marker1768227	B	B	B	A	A	B	B	A	B	B	B	A	A	B	A	A	B	B	A	B	A	A	A	A	B	B	A	A	B	A	B	A	B	B	B	A	B	A	A	B	A	A	B	B	B	A	A	A	A
Marker1672446	B	B	B	A	A	B	B	A	B	B	B	A	A	B	A	A	B	B	A	B	A	A	A	A	B	B	A	A	B	A	B	A	B	B	B	A	B	A	A	B	A	A	B	B	B	A	A	A	A
Marker1683051	B	B	B	A	A	B	B	A	B	B	B	A	A	B	A	A	B	B	A	B	A	A	A	A	B	B	A	A	B	A	B	A	B	B	B	A	B	A	A	B	A	A	B	B	B	A	A	A	A
Marker1713984	B	B	B	A	A	B	B	A	B	B	B	A	A	B	A	A	B	B	A	B	A	A	A	A	B	B	A	A	B	A	B	A	B	B	B	A	B	A	A	B	A	A	B	B	B	A	A	A	A
Marker1677193	B	B	B	A	A	B	B	A	B	B	B	A	A	B	A	A	B	B	A	B	A	A	A	A	B	B	A	A	B	A	B	A	B	B	B	A	B	A	A	B	A	A	B	B	B	A	A	A	A
Marker1716080	B	B	B	A	A	B	B	A	B	B	B	A	A	B	A	A	B	B	A	B	A	A	A	A	B	B	A	A	B	A	B	A	B	B	B	A	B	A	A	B	A	A	B	B	B	A	A	A	A
Marker1724762	B	B	B	A	A	B	B	A	B	B	B	A	A	B	A	A	B	B	A	B	A	A	A	A	B	B	A	A	B	A	B	A	B	B	B	A	B	A	A	B	A	A	B	B	B	A	A	A	A
Marker1668152	B	B	B	A	A	B	B	A	B	B	B	A	A	B	A	A	B	B	A	B	A	A	A	A	B	B	A	A	B	A	B	A	B	B	B	A	B	A	A	B	A	A	B	B	B	A	A	A	A
Marker1718576	B	B	B	A	A	B	B	A	B	B	B	A	A	B	A	A	B	B	A	B	A	A	A	A	B	B	A	A	B	A	B	A	B	B	B	A	B	A	A	B	A	A	B	B	B	A	A	A	A
Marker1764267	B	B	B	A	A	B	B	A	B	B	B	A	A	B	A	A	B	B	A	B	A	A	A	A	B	B	A	A	B	A	B	A	B	B	B	A	B	A	A	B	A	A	B	B	B	A	A	A	A
Marker1756754	B	B	B	A	A	B	B	A	B	B	B	A	A	B	A	A	B	B	A	B	A	A	A	A	B	B	A	A	B	A	B	A	B	B	B	A	B	A	A	B	A	A	B	B	B	A	A	A	A
Marker1739229	B	B	B	A	A	B	B	A	B	B	B	A	A	B	A	A	B	B	A	B	A	A	A	A	B	B	A	A	B	A	B	A	B	B	B	A	B	A	A	B	A	A	B	B	B	A	A	A	A
Marker1772585	B	B	B	A	A	B	B	A	B	B	B	A	A	B	A	A	B	B	A	B	A	A	A	A	B	B	A	A	B	A	B	A	B	B	B	A	B	A	A	B	A	A	B	B	B	A	A	A	A
Marker1741565	B	B	B	A	A	B	B	A	B	B	B	A	A	B	A	A	B	B	A	B	A	A	A	A	B	B	A	A	B	A	B	A	B	B	B	A	B	A	A	B	A	A	B	B	B	A	A	A	A
Marker1689363	B	B	B	A	A	B	B	A	B	B	B	A	A	B	A	A	B	B	A	B	A	A	A	A	B	B	A	A	B	A	B	A	B	B	B	A	B	A	A	B	A	A	B	B	B	A	A	A	A
Marker1768147	B	B	B	A	A	B	B	A	B	B	B	A	A	B	A	A	B	B	A	B	A	A	A	A	B	B	A	A	B	A	B	A	B	B	B	A	B	A	A	B	A	A	B	B	B	A	A	A	A
Marker1720336	B	B	B	A	A	B	B	A	B	B	B	A	A	B	A	A	B	B	A	B	A	A	A	A	B	B	A	A	B	A	B	A	B	B	B	A	B	A	A	B	A	A	B	B	B	A	A	A	A
Marker1751499	B	B	B	A	A	B	B	A	B	B	B	A	A	B	A	A	B	B	A	B	A	A	A	A	B	B	A	A	B	A	B	A	B	B	B	A	B	A	A	B	A	A	B	B	B	A	A	A	A
Marker1721402	B	B	B	A	A	B	B	A	B	B	B	A	A	B	A	A	B	B	A	B	A	A	A	A	B	B	A	A	B	A	B	A	B	B	B	A	B	A	A	B	A	A	B	B	B	A	A	A	A
Marker1760106	B	B	B	A	A	B	B	A	B	B	B	A	A	B	A	A	B	B	A	B	A	A	A	A	B	B	A	A	B	A	B	A	B	B	B	A	B	A	A	B	A	A	B	B	B	A	A	A	A
Marker1679409	B	B	B	A	A	B	B	A	B	B	B	A	A	B	A	A	B	B	A	B	A	A	A	A	B	B	A	A	B	A	B	A	B	B	B	A	B	A	A	B	A	A	B	B	B	A	A	A	A
Marker1682652	B	B	B	A	A	B	B	A	B	B	B	A	A	B	A	A	B	B	A	B	A	A	A	A	B	B	A	A	B	A	B	A	B	B	B	A	B	A	A	B	A	A	B	B	B	A	A	A	A
Marker1687406	B	B	B	A	A	B	B	A	B	B	B	A	A	B	A	A	B	B	A	B	A	A	A	A	B	B	A	A	B	A	B	A	B	B	B	A	B	A	A	B	A	A	B	B	B	A	A	A	A
Marker1665977	B	B	B	A	X	B	B	A	B	B	B	A	A	B	A	A	B	B	A	B	A	A	A	A	B	B	A	A	B	A	B	A	B	B	B	A	B	A	A	B	A	A	H	B	B	A	A	A	A
Marker1763748	B	B	B	A	A	B	B	A	B	B	B	A	A	B	A	A	B	B	A	B	A	A	A	A	B	B	A	A	B	A	B	A	X	B	B	A	B	A	A	B	A	A	H	B	B	A	A	A	A
Marker1689378	B	B	B	A	A	B	B	A	B	B	B	A	A	B	A	A	B	B	A	B	A	A	A	A	B	B	A	A	B	A	B	A	X	B	B	A	H	A	A	B	A	A	X	B	B	A	A	A	A
Marker1759876	B	B	B	A	X	B	B	A	B	B	B	A	A	B	A	A	B	B	A	B	A	A	A	A	B	B	A	A	B	A	B	A	B	B	B	A	H	A	A	B	A	A	H	B	B	A	A	A	A
Marker1773078	B	B	B	A	A	B	B	A	B	B	B	A	A	B	A	A	B	B	A	B	A	A	A	A	B	B	A	A	B	A	B	A	B	B	B	A	H	A	A	B	A	A	H	B	B	A	A	A	A
Marker1670812	B	B	B	A	H	B	B	A	B	B	B	A	A	B	A	A	B	B	A	B	A	A	A	A	B	B	A	A	B	A	B	A	B	B	B	A	H	A	A	B	A	A	H	B	B	A	A	A	A
Marker1761232	B	B	B	A	A	B	B	A	B	B	B	A	A	B	A	A	B	B	A	B	A	A	A	A	B	B	A	A	B	A	B	A	X	B	B	A	B	A	A	B	A	A	A	B	B	A	A	A	A
Marker1761080	B	B	B	A	A	B	B	A	B	B	B	A	A	B	A	A	B	B	A	B	A	A	A	A	B	B	A	A	B	A	B	A	B	B	B	A	B	A	A	B	A	A	A	B	B	A	A	A	A
Marker1725760	B	B	B	A	A	B	B	A	B	B	B	A	A	B	A	A	B	B	A	B	A	A	A	A	B	B	A	A	B	A	B	A	X	B	B	A	B	A	A	B	A	A	A	B	B	A	A	A	A
Marker1756167	B	B	B	A	A	B	B	A	B	B	B	A	A	B	A	A	B	B	A	B	A	A	A	A	B	B	A	A	B	A	B	A	B	B	B	A	B	A	A	B	A	A	A	B	B	A	A	A	A
Marker1691872	B	B	B	A	A	B	B	A	B	B	B	A	A	B	A	A	B	B	A	B	A	A	A	A	B	B	A	A	B	A	B	A	B	B	B	A	B	A	A	B	A	A	A	B	B	A	A	A	A
Marker1752161	B	B	B	A	A	B	B	A	B	B	B	A	A	B	A	A	B	B	A	B	A	A	A	A	B	B	A	A	B	A	B	A	X	B	B	A	X	A	A	B	A	A	X	B	B	A	A	A	A
Marker1713309	B	B	B	A	X	B	B	A	B	B	B	A	A	B	A	A	B	B	A	B	A	A	A	A	B	B	A	A	B	A	B	A	B	B	B	A	B	A	A	B	A	A	X	B	B	A	A	A	A
Marker1663974	B	B	B	A	A	B	B	A	B	B	B	A	A	B	A	A	B	B	A	B	A	A	A	A	B	B	A	A	B	A	B	A	B	B	B	A	B	A	A	B	A	A	X	B	B	A	A	A	A
Marker1746042	B	B	B	A	A	B	B	A	B	B	B	A	A	B	A	A	B	B	A	B	A	A	A	A	B	B	A	A	B	A	B	A	B	B	B	A	B	A	A	B	A	A	H	B	B	A	A	A	A
Marker1753649	B	B	B	A	A	B	B	A	B	B	B	A	A	B	A	A	B	B	A	B	A	A	A	A	B	B	A	A	B	A	B	A	B	B	B	A	B	A	A	B	A	A	B	B	B	A	A	A	A
Marker1684311	B	B	B	A	A	B	B	A	B	B	B	A	A	B	A	A	B	B	A	B	A	A	A	A	B	B	A	A	B	A	B	A	B	B	B	A	B	A	A	B	A	A	H	B	B	A	A	A	A
Marker1679750	B	B	B	A	A	B	B	A	B	B	B	A	A	B	A	A	B	B	A	B	A	A	A	A	B	B	A	A	B	A	B	A	B	B	B	A	B	A	A	B	A	A	H	B	B	A	A	A	A
Marker1747589	B	B	B	A	A	B	B	A	B	B	B	A	A	B	A	A	B	B	A	B	A	A	A	A	B	B	A	A	B	A	B	A	B	B	B	A	B	A	A	B	A	A	H	B	B	A	A	A	A
Marker1724847	B	B	B	A	A	B	B	A	B	B	B	A	A	B	A	A	B	B	A	B	A	A	A	A	B	B	A	A	B	A	B	A	B	B	B	A	B	A	A	B	A	A	H	B	B	A	A	A	A
Marker1681542	B	B	B	A	A	B	B	A	B	B	B	A	A	B	A	A	B	B	A	B	A	A	A	A	B	B	A	A	B	A	B	A	B	B	B	A	B	A	A	B	A	A	H	B	B	A	A	A	A
Marker1689975	B	B	B	A	A	B	B	A	B	B	B	A	A	B	A	A	B	B	A	B	A	A	A	A	B	B	A	A	B	A	B	A	B	B	B	A	B	A	A	B	A	A	X	B	B	A	A	A	A
Marker1702898	B	B	B	A	A	B	B	A	B	B	B	A	A	B	A	A	B	B	A	B	A	A	A	A	B	B	A	A	B	A	B	A	X	B	B	A	B	A	A	B	A	A	H	B	B	A	A	A	A
Marker1684885	B	B	B	A	A	B	B	A	B	B	B	A	A	B	A	A	B	B	A	B	A	A	A	A	B	B	A	A	B	A	B	A	B	B	B	A	B	A	A	B	A	A	X	B	B	A	A	A	A
Marker1704294	B	B	B	A	A	B	B	A	B	B	B	A	A	B	A	A	B	B	A	B	A	A	A	A	B	B	A	A	B	A	B	A	B	B	B	A	B	A	A	B	A	A	B	B	B	A	A	A	A
Marker1752154	B	B	B	A	A	B	B	A	B	B	B	A	A	B	A	A	B	B	A	B	A	A	A	A	B	B	A	A	B	A	B	A	B	B	B	A	B	A	A	B	A	A	B	B	B	A	A	A	A
Marker1745479	B	B	B	A	A	B	B	A	B	B	B	A	A	B	A	A	B	B	A	B	A	A	A	A	B	B	A	A	B	A	B	A	B	B	B	A	B	A	A	B	A	A	B	B	B	A	A	A	A
Marker1756388	B	B	B	A	A	B	B	A	B	B	B	A	A	B	A	A	B	B	A	B	A	A	A	A	B	B	A	A	B	A	B	A	B	B	B	A	B	A	A	B	A	A	B	B	B	A	A	A	A
Marker1760361	B	B	B	A	A	B	B	A	B	B	B	A	A	B	A	A	B	B	A	B	A	A	A	A	B	B	A	A	B	A	B	A	B	B	B	A	B	A	A	B	A	A	B	B	B	A	A	A	A
Marker1718867	B	B	B	A	A	B	B	A	B	B	B	A	A	B	A	A	B	B	A	B	A	A	A	A	B	B	A	A	B	A	B	A	B	B	B	A	B	A	A	B	A	A	X	B	B	A	A	A	A
Marker1731909	B	B	B	A	A	B	B	A	B	B	B	A	A	B	A	A	B	B	A	B	A	A	A	A	B	B	A	A	B	A	B	A	B	B	B	A	B	A	A	B	A	A	B	B	B	A	A	A	A
Marker1734474	B	B	B	A	A	B	B	A	B	B	B	A	A	B	A	A	B	B	A	B	A	A	A	A	B	B	A	A	B	A	B	A	B	B	B	A	B	A	A	B	A	A	B	B	B	A	A	A	A
Marker1710261	B	B	B	A	A	B	B	A	B	B	B	A	A	B	A	A	B	B	A	B	A	A	A	A	B	B	A	A	B	A	B	A	B	B	B	A	B	A	A	B	A	A	B	B	B	A	A	A	A
Marker1768117	B	B	B	A	A	B	B	A	B	B	B	A	A	B	A	A	B	B	A	B	A	A	A	A	B	B	A	A	B	A	B	A	B	B	B	A	B	A	A	B	A	A	B	B	B	A	A	A	A
Marker1705181	B	B	B	A	A	B	B	A	B	B	B	A	A	B	A	A	B	B	A	B	A	A	A	A	B	B	A	A	B	A	B	A	B	B	B	A	B	A	A	B	A	A	B	B	B	A	A	A	A
Marker1756442	B	B	B	A	A	B	B	A	B	B	B	A	A	B	A	A	B	B	A	B	A	A	A	A	B	B	A	A	B	A	B	A	B	B	B	A	B	A	A	B	A	A	B	B	B	A	A	A	A
Marker1724982	B	B	B	A	A	B	B	A	B	B	B	A	A	B	A	A	B	B	A	B	A	A	A	A	B	B	A	A	B	A	B	A	X	B	B	A	B	A	A	B	A	A	B	B	B	A	A	A	A
Marker1686753	B	B	B	A	A	B	B	A	B	B	B	A	A	B	A	A	B	B	A	B	A	A	A	A	B	B	A	A	B	A	B	A	B	B	B	A	B	A	A	B	A	A	B	B	B	A	A	A	A
Marker1737984	B	B	B	A	A	B	B	A	B	B	B	A	A	B	A	A	B	B	A	B	A	A	A	A	B	B	A	A	B	A	B	A	B	B	B	A	H	A	A	B	A	A	B	B	B	A	A	A	A
Marker1732191	B	B	B	A	A	B	B	A	B	B	B	A	A	B	A	A	B	B	A	B	A	A	A	A	B	B	A	A	B	A	B	A	B	B	B	A	B	A	A	B	A	A	B	B	B	A	A	A	A
Marker1699632	B	B	B	A	A	B	B	A	B	B	B	A	A	B	A	A	B	B	A	B	A	A	A	A	B	B	A	A	B	A	B	A	X	B	B	A	B	A	A	B	A	A	B	B	B	A	A	A	A
Marker1743098	B	B	B	A	A	B	B	A	B	B	B	A	A	B	A	A	B	B	A	B	A	A	A	A	B	B	A	A	B	A	B	A	B	B	B	A	B	A	A	B	A	A	B	B	B	A	A	A	A
Marker1757799	B	B	B	A	A	B	B	A	B	B	B	A	A	B	A	A	B	B	A	B	A	A	A	A	B	B	A	A	X	A	B	A	X	B	B	A	B	A	A	B	A	A	B	B	B	A	A	A	A
Marker1772863	B	B	B	A	A	B	B	A	B	B	B	A	A	B	A	A	B	B	A	B	A	A	A	A	B	B	A	A	X	A	B	A	B	B	B	A	B	A	A	B	A	A	B	B	B	A	A	A	A
Marker1693356	B	B	B	A	A	B	B	A	B	B	B	A	A	B	A	A	B	B	A	B	A	A	A	A	B	B	A	A	B	A	B	A	B	B	B	A	X	A	A	B	A	A	B	B	B	A	A	A	A
Marker1674905	B	B	B	A	A	B	B	A	B	B	B	A	A	B	A	A	B	B	A	B	A	A	A	A	B	B	A	A	B	A	B	A	B	B	B	A	B	A	A	B	A	A	B	B	B	A	A	A	A
Marker1744470	B	B	B	A	A	B	B	A	B	B	B	A	A	B	A	A	B	B	A	B	A	A	A	A	X	B	A	A	B	A	B	A	X	B	B	A	B	A	A	B	A	A	B	B	B	A	A	A	A
Marker1761375	B	B	B	A	A	B	B	A	B	B	B	A	A	B	A	A	B	B	A	B	A	A	A	A	X	B	A	A	B	A	B	A	B	B	B	A	B	A	A	B	A	A	B	B	B	A	A	A	A
Marker1672040	B	B	B	A	A	B	B	A	B	B	B	A	A	B	A	A	B	B	A	B	A	A	A	A	B	B	A	A	B	A	B	A	B	B	B	A	B	A	A	B	A	A	B	B	B	A	A	A	A
Marker1773772	B	B	B	A	A	B	B	A	B	B	B	A	A	B	A	A	B	B	A	B	A	A	A	A	B	B	A	A	B	A	B	A	B	B	B	A	B	A	A	B	A	A	B	B	B	A	A	A	A
Marker1724047	B	B	B	A	A	B	B	A	B	B	B	A	A	B	A	A	B	B	A	B	A	A	A	A	B	B	A	A	B	A	B	A	B	B	B	A	B	A	A	B	A	A	B	B	B	A	A	A	A
Marker1726697	B	B	B	A	A	B	B	A	B	B	B	A	A	B	A	A	B	B	A	B	A	A	A	A	X	B	A	A	B	A	B	A	X	B	B	A	B	A	A	B	A	A	H	B	B	A	A	A	A
Marker1778326	B	B	B	A	A	B	B	A	B	B	B	A	A	B	A	A	B	B	A	B	A	A	A	A	B	B	A	A	B	A	B	A	B	B	B	A	B	A	A	B	A	A	H	B	B	A	A	A	A
Marker1741376	B	B	B	A	A	B	B	A	B	B	B	A	A	B	A	A	B	B	A	B	A	A	A	A	B	B	A	A	B	A	B	A	B	B	B	A	B	A	A	B	A	A	H	B	B	A	A	A	A
Marker1720462	B	B	B	A	A	B	B	A	B	B	B	A	A	B	A	A	B	B	A	B	A	A	A	A	X	B	A	A	B	A	B	A	B	B	B	A	B	A	A	B	A	A	B	B	B	A	A	A	A
Marker1696637	B	B	B	A	A	B	B	A	B	B	B	A	A	B	A	A	B	B	A	B	A	A	A	A	X	B	A	A	B	A	B	A	B	B	B	A	B	A	A	B	A	A	B	B	B	A	A	A	A
Marker1707527	B	B	B	A	H	B	B	A	B	B	B	A	A	B	A	A	B	B	A	B	A	A	A	A	B	B	A	A	B	A	B	A	B	B	B	A	B	A	A	B	A	A	B	B	B	A	A	A	A
Marker1678446	B	B	B	A	A	B	B	A	B	B	B	A	A	B	A	A	B	B	A	B	A	A	A	A	B	B	A	A	B	A	B	A	B	B	B	A	B	A	A	B	A	A	B	B	B	A	A	A	A
Marker1774408	B	B	B	A	A	B	B	A	B	B	B	A	A	B	A	A	B	B	A	B	A	A	A	A	B	B	A	A	B	A	B	A	B	B	B	A	B	A	A	B	A	A	B	B	B	A	A	A	A
Marker1664236	B	B	B	A	A	B	B	A	B	B	B	A	A	B	A	A	B	B	A	B	A	A	A	A	B	B	A	A	B	A	B	A	B	B	B	A	B	A	A	B	A	A	B	B	B	A	A	A	A
Marker1712681	B	B	B	A	A	B	B	A	B	B	B	A	A	B	A	A	B	B	A	B	A	A	A	A	B	B	A	A	B	A	B	A	B	B	B	A	B	A	A	B	A	A	B	B	B	A	A	A	A
Marker1705870	B	B	B	A	A	B	B	A	B	B	B	A	A	B	A	A	B	B	A	B	A	A	A	A	B	B	A	A	B	A	B	A	B	B	B	A	H	A	A	B	A	A	B	B	B	A	A	A	A
Marker1689755	B	B	B	A	A	B	B	A	B	B	B	A	A	B	A	A	B	B	A	B	A	A	A	A	B	B	A	A	B	A	B	A	B	B	B	A	H	A	A	B	A	A	B	B	B	A	A	A	A
Marker1706924	B	B	B	A	A	B	B	A	B	B	B	A	A	B	A	A	B	B	A	B	A	A	A	A	B	B	A	A	B	A	B	A	B	B	B	A	H	A	A	B	A	A	B	B	B	A	A	A	A
Marker1667469	B	B	B	A	A	B	B	A	B	B	B	A	A	B	A	A	B	B	A	B	A	A	A	A	B	B	A	A	B	A	B	A	B	B	B	A	H	A	A	B	A	A	B	B	B	A	A	A	A
Marker1719451	B	B	B	A	A	B	B	A	B	B	B	A	A	B	A	A	B	B	A	B	A	A	A	A	B	B	A	A	B	A	B	A	B	B	B	A	H	A	A	B	A	A	B	B	B	A	A	A	A
Marker1678802	B	B	B	A	A	B	B	A	B	B	B	A	A	B	A	A	B	B	A	B	A	A	A	A	B	B	A	A	B	A	B	A	B	B	B	A	H	A	A	B	A	A	B	B	B	A	A	A	A
Marker1674355	B	B	B	A	A	B	B	A	B	B	B	A	A	B	A	A	B	B	A	B	A	A	A	A	B	B	A	A	B	A	B	A	B	B	B	A	B	A	A	B	A	A	B	B	B	A	A	A	A
Marker1693102	B	B	B	A	A	B	B	A	B	B	B	A	A	B	A	A	B	B	A	B	A	A	A	A	B	B	A	A	B	A	B	A	B	B	B	A	B	A	A	B	A	A	B	B	B	A	A	A	A
Marker1703503	B	B	B	A	A	B	B	A	B	B	B	A	A	B	A	A	B	B	A	B	A	A	A	A	B	B	A	A	B	A	B	A	B	B	B	A	H	A	A	B	A	A	B	B	B	A	A	A	A
Marker1707930	B	B	B	A	A	B	B	A	B	B	B	A	A	B	A	A	B	B	A	B	A	A	A	A	B	B	A	A	B	A	B	A	B	B	B	A	H	A	A	B	A	A	B	B	B	A	A	A	A
Marker1773107	B	B	B	A	A	B	B	A	B	B	B	A	A	B	A	A	B	B	A	B	A	A	A	A	B	B	A	A	B	A	B	A	B	B	B	A	H	A	A	B	A	A	B	B	B	A	A	A	A
Marker1664661	B	B	B	A	A	B	B	A	B	B	B	A	A	B	A	A	B	B	A	B	A	A	A	A	B	B	A	A	B	A	B	A	B	B	B	A	B	A	A	B	A	A	B	B	B	A	A	A	A
Marker1734641	B	B	B	A	A	B	B	A	B	B	B	A	A	B	A	A	B	B	A	B	A	A	A	A	B	B	A	A	B	A	B	A	B	B	B	A	B	A	A	B	A	A	B	B	B	A	A	A	A
Marker1729227	B	B	B	A	A	B	B	A	B	B	B	A	A	B	A	A	B	B	A	B	A	A	A	A	B	B	A	A	B	A	B	A	B	B	B	A	B	A	A	B	A	A	X	B	B	A	A	A	A
Marker1748758	B	B	B	A	A	B	B	A	B	B	B	A	A	B	A	A	B	B	A	B	A	A	A	A	B	B	A	A	B	A	B	A	B	B	B	A	B	A	A	B	A	A	B	B	B	A	A	A	A
Marker1709369	B	B	B	A	A	B	B	A	B	B	B	A	A	B	A	A	B	B	A	B	A	A	A	A	B	B	A	A	B	A	B	A	X	B	B	A	B	A	A	B	A	A	B	B	B	A	A	A	A
Marker1697715	B	B	B	A	A	B	B	A	B	B	B	A	A	B	A	A	B	B	A	B	A	A	A	A	B	B	A	A	B	A	B	A	X	B	B	A	B	A	A	B	A	A	B	B	B	A	A	A	A
Marker1721422	B	B	B	A	A	B	B	A	B	B	B	A	A	B	A	A	B	B	A	B	A	A	A	A	B	B	A	A	B	A	B	A	B	B	B	A	B	A	A	B	A	A	B	B	B	A	A	A	A
Marker1707702	B	B	B	A	A	B	B	A	B	B	B	A	A	B	A	A	B	B	A	B	A	A	A	A	B	B	A	A	B	A	B	A	B	B	B	A	H	A	A	B	A	A	B	B	B	A	A	A	A
Marker1711027	B	B	B	A	A	B	B	A	B	B	B	A	A	B	A	A	B	B	A	B	A	A	A	A	B	B	A	A	B	A	B	A	B	B	B	A	H	A	A	B	A	A	B	B	B	A	A	A	A
Marker1666713	B	B	B	A	A	B	B	A	B	B	B	A	A	B	A	A	B	B	A	B	A	A	A	A	B	B	A	A	B	A	B	A	B	B	B	A	H	A	A	B	A	A	B	B	B	A	A	A	A
Marker1736251	B	B	B	A	A	B	B	A	B	B	B	A	A	B	A	A	B	B	A	B	A	A	A	A	B	B	A	A	B	A	B	A	B	B	B	A	B	A	A	B	A	A	B	B	B	A	A	A	A
Marker1752808	B	B	B	A	X	B	B	A	B	B	B	A	A	B	A	A	B	B	A	B	A	A	A	A	B	B	A	A	B	A	B	A	B	B	B	A	B	A	A	B	A	A	B	B	B	A	A	A	A
Marker1713422	B	B	B	A	A	B	B	A	B	B	B	A	A	B	A	A	B	B	A	B	A	A	A	A	B	B	A	A	B	A	B	A	B	B	B	A	B	A	A	B	A	A	B	B	B	A	A	A	A
Marker1684703	B	B	B	A	A	B	B	A	B	B	B	A	A	B	A	A	B	B	A	B	A	A	A	A	B	B	A	A	B	A	B	A	B	B	B	A	B	A	A	B	A	A	B	B	B	A	A	A	A
Marker1678885	B	B	B	A	A	B	B	A	B	B	B	A	A	B	A	A	B	B	A	B	A	A	A	A	B	B	A	A	B	A	B	A	B	B	B	A	B	A	A	B	A	A	B	B	B	A	A	A	A
Marker1696982	B	B	B	A	A	B	B	A	B	B	B	A	A	B	A	A	B	B	A	B	A	A	A	A	B	B	A	A	B	A	B	A	B	B	B	A	B	A	A	B	A	A	B	B	B	A	A	A	A
Marker1751253	B	B	B	A	A	B	B	A	B	B	B	A	A	B	A	A	B	B	A	B	A	A	A	A	B	B	A	A	B	A	B	A	B	B	B	A	B	A	A	B	A	A	B	B	B	A	A	A	A
Marker1698706	B	B	B	A	A	B	B	A	B	B	B	A	A	B	A	A	B	B	A	B	A	A	A	A	B	B	A	A	B	A	B	A	B	B	B	A	B	A	A	B	A	A	B	B	B	A	A	A	A
Marker1665791	B	B	B	A	A	B	B	A	B	B	B	A	A	B	A	A	B	B	A	B	A	A	A	A	B	B	A	A	B	A	A	A	B	B	B	A	X	A	A	B	A	A	B	B	B	A	A	A	A
Marker1769894	B	B	B	A	A	B	B	A	B	B	B	A	A	B	A	A	B	B	A	B	A	A	A	A	B	B	A	A	B	A	A	A	B	B	B	A	B	A	A	B	A	A	B	B	B	A	A	A	A
Marker1664574	B	B	B	A	A	B	B	A	B	B	B	A	A	B	A	A	B	B	A	B	A	A	A	A	B	B	A	A	B	A	A	A	B	B	B	A	B	A	A	B	A	A	H	B	B	A	A	A	A
Marker1690207	B	B	B	A	A	B	B	A	B	B	B	A	A	B	A	A	B	B	A	B	A	A	A	A	B	B	A	A	B	A	A	A	B	B	B	A	B	A	A	B	A	A	H	B	B	A	A	A	A
Marker1711399	B	B	B	A	A	B	B	A	B	B	B	A	A	B	A	A	B	B	A	B	A	A	A	A	B	B	A	A	B	A	A	A	B	B	B	A	B	A	A	B	A	A	H	B	B	A	A	A	A
Marker1709588	B	B	B	A	A	B	B	A	B	B	B	A	A	B	A	A	B	B	A	B	A	A	A	A	B	B	A	A	B	A	A	A	B	B	B	A	B	A	A	B	A	A	H	B	B	A	A	A	A
Marker1721448	B	B	B	A	A	B	B	A	B	B	B	A	A	B	A	A	B	B	A	B	A	A	A	A	B	B	A	A	B	A	A	A	B	B	B	A	B	A	A	B	A	A	X	B	B	A	A	A	A
Marker1684017	B	B	B	A	A	B	B	A	B	B	B	A	A	B	A	A	B	B	A	B	A	A	A	A	B	B	A	A	B	A	A	A	B	B	B	A	B	A	A	B	A	A	H	B	B	A	A	A	A
Marker1737345	B	B	B	A	A	B	B	A	B	B	B	A	A	B	A	A	B	B	A	B	A	A	A	A	B	B	A	A	B	A	A	A	B	B	B	A	B	A	A	B	A	A	H	B	B	A	A	A	A
Marker1712696	B	B	B	A	A	B	B	A	B	B	B	A	A	B	A	A	B	B	A	B	A	A	A	A	B	B	A	A	B	A	A	A	B	B	B	A	H	A	A	B	A	A	H	B	B	A	A	A	A
Marker1752264	B	B	B	A	A	B	B	A	B	B	B	A	A	B	A	A	B	B	A	B	A	A	A	A	B	B	A	A	B	A	A	A	B	B	B	A	H	A	A	B	A	A	H	B	B	A	A	A	A
Marker1747227	B	B	B	A	A	B	B	A	B	B	B	A	A	B	A	A	B	B	A	B	A	A	A	A	B	B	A	A	B	A	A	A	B	B	B	A	H	A	A	B	A	A	H	B	B	A	A	A	A
Marker1693839	B	B	B	A	A	B	B	A	B	B	B	A	A	B	A	A	B	B	A	B	A	A	A	A	B	B	A	A	B	A	A	A	B	B	B	A	H	A	A	B	A	A	H	B	B	A	A	A	A
Marker1676670	B	B	B	A	A	B	B	A	B	B	B	A	A	B	A	A	B	B	A	B	A	A	A	A	B	B	A	A	B	A	A	A	B	B	B	A	H	A	A	B	A	A	H	B	B	A	A	A	A
Marker1735353	B	B	B	A	A	B	B	A	B	B	B	A	A	B	A	A	B	B	A	B	A	A	A	A	B	B	A	A	B	A	A	A	B	B	B	A	H	A	A	B	A	A	H	B	B	A	A	A	A
Marker1694835	B	B	B	A	A	B	B	A	B	B	B	A	A	B	A	A	B	B	A	B	A	A	A	A	B	B	A	A	B	A	A	A	B	B	B	A	X	A	A	B	A	A	H	B	B	A	A	A	A
Marker1705865	B	B	B	A	A	B	B	A	B	B	B	A	A	B	A	A	B	B	A	B	A	A	A	A	B	B	A	A	B	A	A	A	B	B	B	A	B	A	A	B	A	A	H	B	B	A	A	A	A
Marker1748017	B	B	B	A	A	B	B	A	B	B	B	A	A	B	A	A	B	B	A	B	A	A	A	A	B	B	A	A	B	A	A	A	B	B	B	A	B	A	A	B	A	A	H	B	B	A	A	A	A
Marker1670534	B	B	B	A	A	B	B	A	B	B	B	A	A	B	A	A	B	B	A	B	A	A	A	A	B	B	A	A	B	A	A	A	B	B	B	A	B	A	A	B	A	A	X	B	B	A	A	A	A
Marker1727391	B	B	B	A	A	B	B	A	B	B	B	A	A	B	A	A	B	B	A	B	A	A	A	A	B	B	A	A	B	A	A	A	B	B	B	A	B	A	A	B	A	A	H	B	B	A	A	A	A
Marker1706555	B	B	B	A	A	B	B	A	B	B	B	A	A	B	A	A	B	B	A	B	A	A	A	A	B	B	A	A	B	A	A	A	B	B	B	A	B	A	A	B	A	A	B	B	B	A	A	A	A
Marker1748843	B	B	B	A	A	B	B	A	B	B	B	A	A	B	A	A	B	B	A	B	A	A	A	A	B	B	A	A	B	A	A	A	B	B	B	A	B	A	A	B	A	A	H	B	B	A	A	A	A
Marker1740467	B	B	B	A	A	B	B	A	B	B	B	A	A	B	A	A	B	B	A	B	A	A	A	A	B	B	A	A	B	A	A	A	B	B	B	A	B	A	A	B	A	A	H	B	B	A	A	A	A
Marker1751480	B	B	B	A	A	B	B	A	B	B	B	A	A	B	A	A	B	B	A	B	A	A	A	A	B	B	A	A	B	A	A	A	B	B	B	A	B	A	A	B	A	A	H	B	B	A	A	A	A
Marker1720003	B	B	B	A	A	B	B	A	B	B	B	A	A	B	A	A	B	B	A	B	A	A	A	A	B	B	A	A	B	A	A	A	B	B	B	A	B	A	A	B	A	A	B	B	B	A	A	A	A
Marker1755584	B	B	B	A	A	B	B	A	B	B	B	A	A	B	A	A	B	B	A	B	A	A	A	A	B	B	A	A	B	A	A	A	B	B	B	A	B	A	A	B	A	A	B	B	B	A	A	A	A
Marker1765247	B	B	B	A	A	B	B	A	B	B	B	A	A	B	A	A	B	B	A	B	A	A	A	A	B	B	A	A	B	A	A	A	B	B	B	A	B	A	A	B	A	A	X	B	B	A	A	A	A
Marker1699957	B	B	B	A	H	B	B	A	B	B	B	A	A	B	A	A	B	B	A	B	A	A	A	A	B	B	A	A	B	A	A	A	B	B	B	A	X	A	A	B	A	A	B	B	B	A	A	A	A
Marker1724166	B	B	B	A	A	B	B	A	B	B	B	A	A	B	A	A	B	B	A	B	A	A	A	A	B	B	A	A	B	A	A	A	B	B	B	A	H	A	A	B	A	A	B	B	B	A	A	A	A
Marker1670843	B	B	B	A	A	B	B	A	B	B	B	A	A	B	A	A	B	B	A	B	A	A	A	A	B	B	A	A	B	A	A	A	B	B	B	A	H	A	A	B	A	A	B	B	B	A	A	A	A
Marker1776532	B	B	B	A	A	B	B	A	B	B	B	A	A	B	A	A	B	B	A	B	A	A	A	A	B	B	A	A	B	A	A	A	B	B	B	A	H	A	A	B	A	A	B	B	B	A	A	A	A
Marker1768377	B	B	B	A	A	B	B	A	B	B	B	A	A	B	A	A	B	B	A	B	A	A	A	A	B	B	A	A	B	A	A	A	B	B	B	A	B	A	A	B	A	A	B	B	B	A	A	A	A
Marker1754292	B	B	B	A	A	B	B	A	B	B	B	A	A	B	A	A	B	B	A	B	A	A	A	A	B	B	A	A	B	A	A	A	B	B	B	A	B	A	A	B	A	A	B	B	B	A	A	A	A
Marker1687317	B	B	B	A	A	B	B	A	B	B	B	A	A	B	A	A	B	B	A	B	A	A	A	A	B	B	A	A	B	A	A	A	B	B	B	A	B	A	A	B	A	A	B	B	B	A	A	A	A
Marker1723844	B	B	B	A	A	B	B	A	B	B	B	A	A	B	A	A	B	B	A	B	A	A	A	A	B	B	A	A	B	A	A	A	B	B	B	A	B	A	A	B	A	A	H	B	B	A	A	A	A
Marker1773640	B	B	B	A	A	B	B	A	B	B	B	A	A	B	A	A	B	B	A	B	A	A	A	A	B	B	A	A	B	A	A	A	B	B	B	A	B	A	A	B	A	A	B	B	B	A	A	A	A
Marker1756643	B	B	B	A	A	B	B	A	B	B	B	A	A	B	A	A	B	B	A	B	A	A	A	A	B	B	A	A	B	A	A	A	B	B	B	A	B	A	A	B	A	A	B	B	B	A	A	A	A
Marker1688626	B	B	B	A	A	B	B	A	B	B	B	A	A	B	A	A	B	B	A	B	A	A	A	A	B	B	A	A	B	A	A	A	B	B	B	A	B	A	A	B	A	A	B	B	B	A	A	A	A
Marker1725322	B	B	B	A	A	B	B	A	B	B	B	A	A	B	A	A	B	B	A	B	A	A	A	A	B	B	A	A	B	A	A	A	B	B	B	A	H	A	A	B	A	A	B	B	B	A	A	A	A
Marker1730720	B	B	B	A	A	B	B	A	B	B	B	A	A	B	A	A	B	B	A	B	A	A	A	A	B	B	A	A	B	A	A	A	B	B	B	A	B	A	A	B	A	A	H	B	B	A	A	A	A
Marker1716133	B	B	B	A	A	B	B	A	B	B	B	A	A	B	A	A	B	B	A	B	A	A	A	A	B	B	A	A	B	A	A	A	B	B	B	A	H	A	A	B	A	A	H	B	B	A	A	A	A
Marker1772734	B	B	B	A	A	B	B	A	B	B	B	A	A	B	A	A	B	B	A	B	A	A	A	A	B	B	A	A	B	A	A	A	B	B	B	A	B	A	A	B	A	A	H	B	B	A	A	A	A
Marker1729957	B	B	B	A	A	B	B	A	B	B	B	A	A	B	A	A	B	B	A	B	A	A	A	A	B	B	A	A	B	A	A	A	B	B	B	A	B	A	A	B	A	A	B	B	B	A	A	A	A
Marker1756475	B	B	B	A	A	B	B	A	B	B	B	A	A	B	A	A	B	B	A	B	A	A	A	A	B	B	A	A	B	A	A	A	B	B	B	A	B	A	A	B	A	A	B	B	B	A	A	A	A
Marker1726608	B	B	B	A	A	B	B	A	B	B	B	A	A	B	A	A	B	B	A	B	A	A	A	A	B	B	A	A	B	A	A	A	B	B	B	A	B	A	A	B	A	A	B	B	B	A	A	A	A
Marker1769490	B	B	B	A	A	B	B	A	B	B	B	A	A	B	A	A	B	B	A	B	A	A	A	A	B	B	A	A	B	A	A	A	B	B	B	A	B	A	A	B	A	A	B	B	B	A	A	A	A
Marker1764133	B	B	B	A	A	B	B	A	B	B	B	A	A	B	A	A	B	B	A	B	A	A	A	A	B	B	A	A	B	A	A	A	B	B	B	A	B	A	A	B	A	A	B	B	B	A	A	A	A
Marker1681738	B	B	B	A	A	B	B	A	B	B	B	A	A	B	A	A	B	B	A	B	A	A	A	A	B	B	A	A	B	A	A	A	B	B	B	A	B	A	A	B	A	A	B	B	B	A	A	A	A
Marker1748118	B	B	B	A	A	B	B	A	B	B	B	A	A	B	A	A	B	B	A	B	A	A	A	A	B	B	A	A	B	A	A	A	B	B	B	A	B	A	A	B	A	A	X	B	B	A	A	A	A
Marker1747584	B	B	B	A	A	B	B	A	B	B	B	A	A	B	A	A	B	B	A	B	A	A	A	A	B	B	A	A	B	A	A	A	B	B	B	A	B	A	A	B	A	A	H	B	B	A	A	A	A
Marker1719963	B	B	B	A	A	B	B	A	B	B	B	A	A	B	A	A	B	B	A	B	A	A	A	A	B	B	A	A	B	A	A	A	B	B	B	A	B	A	A	B	A	A	B	B	B	A	A	A	A
Marker1745480	B	B	B	A	A	B	B	A	B	B	B	A	A	B	A	A	B	B	A	B	A	A	A	A	B	B	A	A	B	A	A	A	B	B	B	A	B	A	A	B	A	A	B	B	B	A	A	A	A
Marker1701530	B	B	B	A	A	B	B	A	B	B	B	A	A	B	A	A	B	B	A	B	A	A	A	A	B	B	A	A	B	A	A	A	B	B	B	A	H	A	A	B	A	A	B	B	B	A	A	A	A
Marker1714251	B	B	B	A	A	B	B	A	B	B	B	A	A	B	A	A	B	B	A	B	A	A	A	A	B	B	A	A	B	A	A	A	B	B	B	A	H	A	A	B	A	A	B	B	B	A	A	A	A
Marker1743263	B	B	B	A	A	B	B	A	B	B	B	A	A	B	A	A	B	B	A	B	A	A	A	A	B	B	A	A	B	A	A	A	B	B	B	A	H	A	A	B	A	A	B	B	B	A	A	A	A
Marker1668026	B	B	B	A	A	B	B	A	B	B	B	A	A	B	A	A	B	B	A	B	A	A	A	A	B	B	A	A	B	A	A	A	B	B	B	A	B	A	A	B	A	A	B	B	B	A	A	A	A
Marker1666707	B	B	B	A	A	B	B	A	B	B	B	A	A	B	A	A	B	B	A	B	A	A	A	A	B	B	A	A	B	A	A	A	B	B	B	A	B	A	A	B	A	A	B	B	B	A	A	A	A
Marker1671172	B	B	B	A	A	B	B	A	B	B	B	A	A	B	A	A	B	B	A	B	A	A	A	A	B	B	A	A	B	A	A	A	B	B	B	A	B	A	A	B	A	A	B	B	B	A	A	A	A
Marker1697278	B	B	B	A	A	B	B	A	B	B	B	A	A	B	A	A	B	B	A	B	A	A	A	A	B	B	A	A	B	A	A	A	B	B	B	A	B	A	A	B	A	A	B	B	B	A	A	A	A
Marker1750522	B	B	B	A	A	B	B	A	B	B	B	A	A	B	A	A	B	B	A	B	A	A	A	A	B	B	A	A	B	A	A	A	B	B	B	A	B	A	A	B	A	A	B	B	B	A	A	A	A
Marker1720065	B	B	B	A	A	B	B	A	B	B	B	A	A	B	A	A	B	B	A	B	A	A	A	A	B	B	A	A	B	A	A	A	B	B	B	A	B	A	A	B	A	A	B	B	B	A	A	A	A
Marker1714322	B	B	B	A	A	B	B	A	B	B	B	A	A	B	A	A	B	B	A	B	A	A	A	A	B	B	A	A	B	A	A	A	B	B	B	A	B	A	A	B	A	A	B	B	B	A	A	A	A
Marker1688525	B	B	B	A	A	B	B	A	B	B	B	A	A	B	A	A	B	B	A	B	A	A	A	A	B	B	A	A	B	A	A	A	B	B	B	A	B	A	A	B	A	A	B	B	B	A	A	A	A
Marker1715391	B	B	B	A	A	B	B	A	B	B	B	A	A	B	A	A	B	B	A	B	A	A	A	A	B	B	A	A	B	A	A	A	B	B	B	A	B	A	A	B	A	A	H	B	B	A	A	A	A
Marker1777924	B	B	B	A	A	B	B	A	B	B	B	A	A	B	A	A	B	B	A	B	A	A	A	A	B	B	A	A	B	A	A	A	B	B	B	A	B	A	A	B	A	A	B	B	B	A	A	A	A
Marker1673728	B	B	B	A	A	B	B	A	B	B	B	A	A	B	A	A	B	B	A	B	A	A	A	A	B	B	A	A	B	A	A	A	B	B	B	A	B	A	A	B	A	A	B	B	B	A	A	A	A
Marker1681513	B	B	B	A	A	B	B	A	B	B	B	A	A	B	A	A	B	B	A	B	A	A	A	A	B	B	A	A	B	A	A	A	B	B	B	A	B	A	A	B	A	A	B	B	B	A	A	A	A
Marker1688256	B	B	B	A	A	B	B	A	B	B	B	A	A	B	A	A	B	B	A	B	A	A	A	A	B	B	A	A	B	A	A	A	B	B	B	A	B	A	A	B	A	A	B	B	B	A	A	A	A
Marker1709370	B	B	B	A	A	B	B	A	B	B	B	A	A	B	A	A	B	B	A	B	A	A	A	A	B	B	A	A	B	A	A	A	X	B	B	A	B	A	A	B	A	A	X	B	B	A	A	A	A
Marker1677250	B	B	B	A	A	B	B	A	B	B	B	A	A	B	A	A	B	B	A	B	A	A	A	A	B	B	A	A	B	A	A	A	B	B	B	A	B	A	A	B	A	A	B	B	B	A	A	A	A
Marker1688397	B	B	B	A	A	B	B	A	B	B	B	A	A	B	A	A	B	B	A	B	A	A	A	A	B	B	A	A	B	A	A	A	B	B	B	A	B	A	A	B	A	A	B	B	B	A	A	A	A
Marker1752865	B	B	B	A	A	B	B	A	B	B	B	A	A	B	A	A	B	B	A	B	A	A	A	A	B	B	A	A	B	A	A	A	B	B	B	A	B	A	A	B	A	A	B	B	B	A	A	A	A
Marker1757964	B	B	B	A	A	B	B	A	B	B	B	A	A	B	A	A	B	B	A	B	A	A	A	A	B	B	A	A	B	A	A	A	B	B	B	A	B	A	A	B	A	A	B	B	B	A	A	A	A
Marker1759659	B	B	B	A	A	B	B	A	B	B	B	A	A	B	A	A	B	B	A	B	A	A	A	A	B	B	A	A	B	A	A	A	B	B	B	A	B	A	A	B	A	A	B	B	B	A	A	A	A
Marker1760130	B	B	B	A	A	B	B	A	B	B	B	A	A	B	A	A	B	B	A	B	A	A	A	A	B	B	A	A	B	A	A	A	B	B	B	A	B	A	A	B	A	A	B	B	B	A	A	A	A
Marker1772199	B	B	B	A	A	B	B	A	B	B	B	A	A	B	A	A	B	B	A	B	A	A	A	A	B	B	A	A	B	A	A	A	B	B	B	A	X	A	A	B	A	A	H	B	B	A	A	A	A
Marker1679912	B	B	B	A	A	B	B	A	B	B	B	A	A	B	A	A	B	B	A	B	A	A	A	A	B	B	A	A	B	A	A	A	B	B	B	A	B	A	A	B	A	A	H	B	B	A	A	A	A
Marker1690325	B	B	B	A	A	B	B	A	B	B	B	A	A	B	A	A	B	B	A	B	A	A	A	A	B	B	A	A	B	A	A	A	B	B	B	A	B	A	A	B	A	A	B	B	B	A	A	A	A
Marker1771010	B	B	B	A	A	B	B	A	B	B	B	A	A	B	A	A	B	B	A	B	A	A	A	A	B	B	A	A	B	A	A	A	B	B	B	A	B	A	A	B	A	A	B	B	B	A	A	A	A
Marker1740153	B	B	B	A	A	B	B	A	B	B	B	A	A	B	A	A	B	B	A	B	A	A	A	A	B	B	A	A	B	A	A	A	B	B	B	A	B	A	A	B	A	A	B	B	B	A	A	A	A
Marker1736878	B	B	B	A	A	B	B	A	B	B	B	A	A	B	A	A	B	B	A	B	A	A	A	A	B	B	A	A	B	A	A	A	B	B	B	A	B	A	A	B	A	A	B	B	B	A	A	A	A
Marker1739610	B	B	B	A	A	B	B	A	B	B	B	A	A	B	A	A	B	B	A	B	A	A	A	A	B	B	A	A	B	A	A	A	B	B	B	A	B	A	A	B	A	A	B	B	B	A	A	A	A
Marker1700457	B	B	B	A	A	B	B	A	B	B	B	A	A	B	A	A	B	B	A	B	A	A	A	A	B	B	A	A	B	A	A	A	B	B	B	A	B	A	A	B	A	A	B	B	B	A	A	A	A
Marker1705231	B	B	B	A	A	B	B	A	B	B	B	A	A	B	A	A	B	B	A	B	A	A	A	A	B	B	A	A	B	A	A	A	B	B	B	A	H	A	A	B	A	A	B	B	B	A	A	A	A
Marker1724891	B	B	B	A	X	B	B	A	B	B	B	A	A	B	A	A	B	B	A	B	A	A	A	A	B	B	A	A	B	A	A	A	B	B	B	A	H	A	A	B	A	A	B	B	B	A	A	A	A
Marker1672388	B	B	B	A	H	B	B	A	B	B	B	A	A	B	A	A	B	B	A	B	A	A	A	A	B	B	A	A	B	A	A	A	B	B	B	A	H	A	A	B	A	A	B	B	B	A	A	A	A
Marker1725687	B	B	B	A	H	B	B	A	B	B	B	A	A	B	A	A	B	B	A	B	A	A	A	A	B	B	A	A	B	A	A	A	B	B	B	A	B	A	A	B	A	A	B	B	B	A	A	A	A
Marker1760828	B	B	B	A	A	B	B	A	B	B	B	A	A	B	A	A	B	B	A	B	A	A	A	A	B	B	A	A	B	A	A	A	B	B	B	A	B	A	A	B	A	A	B	B	B	A	A	A	A
Marker1697336	B	B	B	A	A	B	B	A	B	B	B	A	A	B	A	A	B	B	A	B	A	A	A	A	B	B	A	A	B	A	A	A	B	B	B	A	B	A	A	B	A	A	B	B	B	A	A	A	A
Marker1722632	B	B	B	A	H	B	B	A	B	B	B	A	A	B	A	A	B	B	A	B	A	A	A	A	B	B	A	A	B	A	A	A	B	B	B	A	B	A	A	B	A	A	B	B	B	A	A	A	A
Marker1687421	B	B	B	A	H	B	B	A	B	B	B	A	A	B	A	A	B	B	A	B	A	A	A	A	B	B	A	A	B	A	A	A	B	B	B	A	B	A	A	B	A	A	B	B	B	A	A	A	A
Marker1769530	B	B	B	A	A	B	B	A	B	B	B	A	A	B	A	A	B	B	A	B	A	A	A	A	B	B	A	A	B	A	A	A	B	B	B	A	B	A	A	B	A	A	B	B	B	A	A	A	A
Marker1727530	B	B	B	A	A	B	B	A	B	B	B	A	A	B	A	A	B	B	A	B	A	A	A	A	B	B	A	A	B	A	A	A	B	B	B	A	B	A	A	B	A	A	H	B	B	A	A	A	A
Marker1721841	B	B	B	A	A	B	B	A	B	B	B	A	A	B	A	A	B	B	A	B	A	A	A	A	B	B	A	A	B	A	A	A	B	B	B	A	B	A	A	B	A	A	H	B	B	A	A	A	A
Marker1689811	B	B	B	A	A	B	B	A	B	B	B	A	A	B	A	A	B	B	A	B	A	A	A	A	B	B	A	A	B	A	A	A	B	B	B	A	B	A	A	B	A	A	H	B	B	A	A	A	A
Marker1709222	B	B	B	A	A	B	B	A	B	B	B	A	A	B	A	A	B	B	A	B	A	A	A	A	X	B	A	A	B	A	A	A	B	B	B	A	B	A	A	B	A	A	B	B	B	A	A	A	A
Marker1729272	B	B	B	A	A	B	B	A	B	B	B	A	A	B	A	A	B	B	A	B	A	A	A	A	X	B	A	A	X	A	A	A	B	B	B	A	B	A	A	B	A	A	B	B	B	A	A	A	A
Marker1750016	B	B	B	A	A	B	B	A	B	B	B	A	A	B	A	A	B	B	A	B	A	A	A	A	X	B	A	A	B	A	A	A	B	B	B	A	X	A	A	B	A	A	B	B	B	A	A	A	A
Marker1701121	B	B	B	A	A	B	B	A	B	B	B	A	A	B	A	A	B	B	A	B	A	A	A	A	X	B	A	A	B	A	A	A	B	B	B	A	B	A	A	B	A	A	B	B	B	A	A	A	A
Marker1751101	B	B	B	A	A	B	B	A	B	B	B	A	A	B	A	A	B	B	A	B	A	A	A	A	B	B	A	A	X	A	A	A	B	B	B	A	B	A	A	B	A	A	B	B	B	A	A	A	A
Marker1666833	B	B	B	A	A	B	B	A	B	B	B	A	A	B	A	A	B	B	A	B	A	A	A	A	X	B	A	A	B	A	A	A	B	B	B	A	B	A	A	B	A	A	X	B	B	A	A	A	A
Marker1667037	B	B	B	A	A	B	B	A	B	B	B	A	A	B	A	A	B	B	A	B	A	A	A	A	B	B	A	A	B	A	A	A	B	B	B	A	B	A	A	B	A	A	B	B	B	A	A	A	A
Marker1715259	B	B	B	A	A	B	B	A	B	B	B	A	A	B	A	A	B	B	A	B	A	A	A	A	B	B	A	A	X	A	A	A	B	B	B	A	B	A	A	B	A	A	B	B	B	A	A	A	A
Marker1753901	B	B	B	A	A	B	B	A	B	B	B	A	A	B	A	A	B	B	A	B	A	A	A	A	B	B	A	A	B	A	A	A	B	B	B	A	B	A	A	B	A	A	H	B	B	A	A	A	A
Marker1769483	B	B	B	A	A	B	B	A	B	B	B	A	A	B	A	A	B	B	A	B	A	A	A	A	B	B	A	A	B	A	A	A	B	B	B	A	B	A	A	B	A	A	B	B	B	A	A	A	A
Marker1714936	B	B	B	A	A	B	B	A	B	B	B	A	A	B	A	A	B	B	A	B	A	A	A	A	B	B	A	A	B	A	A	A	B	B	B	A	B	A	A	B	A	A	B	B	B	A	A	A	A
Marker1735446	B	B	B	A	A	B	B	A	B	B	B	A	A	B	A	A	B	B	A	B	A	A	A	A	B	B	A	A	X	A	A	A	B	B	B	A	B	A	A	B	A	A	H	B	B	A	A	A	A
Marker1756080	B	B	B	A	H	B	B	A	B	B	B	A	A	B	A	A	B	B	A	B	A	A	A	A	B	B	A	A	B	A	A	A	X	B	B	A	B	A	A	B	A	A	H	B	B	A	A	A	A
Marker1776558	B	B	B	A	A	B	B	A	B	B	B	A	A	B	A	A	B	B	A	B	A	A	A	A	B	B	A	A	B	A	A	A	X	B	B	A	B	A	A	B	A	A	H	B	B	A	A	A	A
Marker1737165	B	B	B	A	A	B	B	A	B	B	B	A	A	B	A	A	B	B	A	B	A	A	A	A	B	B	A	A	X	A	A	A	B	B	B	A	B	A	A	B	A	A	B	B	B	A	A	A	A
Marker1758116	B	B	B	A	A	B	B	A	B	B	B	A	A	B	A	A	B	B	A	B	A	A	A	A	B	B	A	A	B	A	A	A	B	B	B	A	B	A	A	B	A	A	B	B	B	A	A	A	A
Marker1743086	B	B	B	A	H	B	B	A	B	B	B	A	A	B	A	A	B	B	A	B	A	A	A	A	B	B	A	A	B	A	A	A	X	B	B	A	B	A	A	B	A	A	B	B	B	A	A	A	A
Marker1668689	B	B	B	A	A	B	B	A	B	B	B	A	A	B	A	A	B	B	A	B	A	A	A	A	B	B	A	A	B	A	A	A	B	B	B	A	B	A	A	B	A	A	B	B	B	A	A	A	A
Marker1740054	B	B	B	A	H	B	B	A	B	B	B	A	A	B	A	A	B	B	A	B	A	A	A	A	B	B	A	A	B	A	A	A	B	B	B	A	H	A	A	B	A	A	B	B	B	A	A	A	A
Marker1751543	B	B	B	A	X	B	B	A	B	B	B	A	A	B	A	A	B	B	A	B	A	A	A	A	B	B	A	A	B	A	A	A	X	B	B	A	H	A	A	B	A	A	B	B	B	A	A	A	A
Marker1674594	B	B	B	A	H	B	B	A	B	B	B	A	A	B	A	A	B	B	A	B	A	A	A	A	B	B	A	A	B	A	A	A	B	B	B	A	H	A	A	B	A	A	B	B	B	A	A	A	A
Marker1771964	B	B	B	A	A	B	B	A	B	B	B	A	A	B	A	A	B	B	A	B	A	A	A	A	B	B	A	A	B	A	A	A	B	B	B	A	H	A	A	B	A	A	B	B	B	A	A	A	A
Marker1681134	B	B	B	A	X	B	B	A	B	B	B	A	A	B	A	A	B	B	A	B	A	A	A	A	X	B	A	A	B	A	A	A	B	B	B	A	X	A	A	B	A	A	B	B	B	A	A	A	A
Marker1753958	B	B	B	A	A	B	B	A	B	B	B	A	A	B	A	A	B	B	A	B	A	A	A	A	B	B	A	A	B	A	A	A	B	B	B	A	B	A	A	B	A	A	B	B	B	A	A	A	A
Marker1714275	B	B	B	A	A	B	B	A	B	B	B	A	A	B	A	A	B	B	A	B	A	A	A	A	B	B	A	A	B	A	A	A	X	B	B	A	B	A	A	B	A	A	B	B	B	A	A	A	A
Marker1695513	B	B	B	A	X	B	B	A	B	B	B	A	A	B	A	A	B	B	A	B	A	A	A	A	B	B	A	A	B	A	A	A	X	B	B	A	H	A	A	B	A	A	B	B	B	A	A	A	A
Marker1684640	B	B	B	A	H	B	B	A	B	B	B	A	A	B	A	A	B	B	A	B	A	A	A	A	B	B	A	A	B	A	A	A	X	B	B	A	X	A	A	B	A	A	B	B	B	A	A	A	A
Marker1731707	B	B	B	A	A	B	B	A	B	B	B	A	A	B	A	A	B	B	A	B	A	A	A	A	B	B	A	A	B	A	A	A	B	B	B	A	H	A	A	B	A	A	B	B	B	A	A	A	A
Marker1729127	B	B	B	A	A	B	B	A	B	B	B	A	A	B	A	A	B	B	A	B	A	A	A	A	B	B	A	A	X	A	A	A	B	B	B	A	H	A	A	B	A	A	B	B	B	A	A	A	A
Marker1720649	B	B	B	A	A	B	B	A	B	B	B	A	A	B	A	A	B	B	A	B	A	A	A	A	B	B	A	A	B	A	A	A	X	B	B	A	B	A	A	B	A	A	H	B	B	A	A	A	A
Marker1756270	B	B	B	A	A	B	B	A	B	B	B	A	A	B	A	A	B	B	A	B	A	A	A	A	B	B	A	A	B	A	A	A	X	B	B	A	H	A	A	B	A	A	B	B	B	A	A	A	A
Marker1719904	B	B	B	A	A	B	B	A	B	B	B	A	A	B	A	A	B	B	A	B	A	A	A	A	B	B	A	A	B	A	A	A	X	B	B	A	H	A	A	B	A	A	B	B	B	A	A	A	A
Marker1670428	B	B	B	A	A	B	B	A	B	B	B	A	A	B	A	A	B	B	A	B	A	A	A	A	B	B	A	A	B	A	A	A	B	B	B	A	B	A	A	B	A	A	B	B	B	A	A	A	A
Marker1701214	B	B	B	A	A	B	B	A	B	B	B	A	A	B	A	A	B	B	A	B	A	A	A	A	B	B	A	A	B	A	A	A	X	B	B	A	H	A	A	B	A	A	B	B	B	A	A	A	A
Marker1688491	B	B	B	A	A	B	B	A	B	B	B	A	A	B	A	A	B	B	A	B	A	A	A	A	B	B	A	A	B	A	A	A	B	B	B	A	H	A	A	B	A	A	B	B	B	A	A	A	A
Marker1669026	B	B	B	A	A	B	B	A	B	B	B	A	A	B	A	A	B	B	A	B	A	A	A	A	B	B	A	A	B	A	A	A	X	B	B	A	H	A	A	B	A	A	B	B	B	A	A	A	A
Marker1750918	B	B	B	A	A	B	B	A	B	B	B	A	A	B	A	A	B	B	A	B	A	A	A	A	B	B	A	A	B	A	A	A	B	B	B	A	H	A	A	B	A	A	B	B	B	A	A	A	A
Marker1761827	B	B	B	A	A	B	B	A	B	B	B	A	A	B	A	A	B	B	A	B	A	A	A	A	B	B	A	A	B	A	A	A	X	B	B	A	B	A	A	B	A	A	B	B	B	A	A	A	A
Marker1696191	B	B	B	A	A	B	B	A	B	B	B	A	A	B	A	A	B	B	A	B	A	A	A	A	B	B	A	A	B	A	A	A	B	B	B	A	B	A	A	B	A	A	H	B	B	A	A	A	A
Marker1671288	B	B	B	A	A	B	B	A	B	B	B	A	A	B	A	A	B	B	A	B	A	A	A	A	B	B	A	A	B	A	A	A	B	B	B	A	B	A	A	B	A	A	H	B	B	A	A	A	A
Marker1699954	B	B	B	A	A	B	B	A	B	B	B	A	A	B	A	A	B	B	A	B	A	A	A	A	B	B	A	A	B	A	A	A	B	B	B	A	B	A	A	B	A	A	H	B	B	A	A	A	A
Marker1749779	B	B	B	A	A	B	B	A	B	B	B	A	A	B	A	A	B	B	A	B	A	A	A	A	B	B	A	A	B	A	A	A	B	B	B	A	B	A	A	B	A	A	H	B	B	A	A	A	A
Marker1764501	B	B	B	A	A	B	B	A	B	B	B	A	A	B	A	A	B	B	A	B	A	A	A	A	B	B	A	A	B	A	A	A	X	B	B	A	H	A	A	B	A	A	H	B	B	A	A	A	A
Marker1729525	B	B	B	A	A	B	B	A	B	B	B	A	A	B	A	A	B	B	A	B	A	A	A	A	B	B	A	A	B	A	A	A	X	B	B	A	B	A	A	B	A	A	B	B	B	A	A	A	A
Marker1709684	B	B	B	A	A	B	B	A	B	B	B	A	A	B	A	A	B	B	A	B	A	A	A	A	B	B	A	A	B	A	A	A	X	B	B	A	B	A	A	B	A	A	B	B	B	A	A	A	A
Marker1721058	B	B	B	A	A	B	B	A	B	B	B	A	A	B	A	A	B	B	A	B	A	A	A	A	B	B	A	A	B	A	A	A	B	B	B	A	B	A	A	B	A	A	B	B	B	A	A	A	A
Marker1680117	B	B	B	A	A	B	B	A	B	B	B	A	A	B	A	A	B	B	A	B	A	A	A	A	B	B	A	A	B	A	A	A	B	B	B	A	B	A	A	B	A	A	B	B	B	A	A	A	A
Marker1684351	B	B	B	A	A	B	B	A	B	B	B	A	A	B	A	A	B	B	A	B	A	A	A	A	X	B	A	A	B	A	A	A	B	B	B	A	B	A	A	B	A	A	B	B	B	A	A	A	A
Marker1664863	B	B	B	A	A	B	B	A	B	B	B	A	A	B	A	A	B	B	A	B	A	A	A	A	B	B	A	A	B	A	A	A	B	B	B	A	B	A	A	B	A	A	B	B	B	A	A	A	A
Marker1685445	B	B	B	A	A	B	B	A	B	B	B	A	A	B	A	A	B	B	A	B	A	A	A	A	X	B	A	A	B	A	A	A	B	B	B	A	B	A	A	B	A	A	B	B	B	A	A	A	A
Marker1734728	B	B	B	A	A	B	B	A	B	B	B	A	A	B	A	A	B	B	A	B	A	A	A	A	X	B	A	A	B	A	A	A	B	B	B	A	H	A	A	B	A	A	B	B	B	A	A	A	A
Marker1670101	B	B	B	A	A	B	B	A	B	B	B	A	A	B	A	A	B	B	A	B	A	A	A	A	B	B	A	A	B	A	A	A	B	B	B	A	B	A	A	B	A	A	B	B	B	A	A	A	A
Marker1672203	B	B	B	A	A	B	B	A	B	B	B	A	A	B	A	A	B	B	A	B	A	A	A	A	B	B	A	A	B	A	A	A	B	B	B	A	H	A	A	B	A	A	B	B	B	A	A	A	A
Marker1722576	B	B	B	A	A	B	B	A	B	B	B	A	A	B	A	A	B	B	A	B	A	A	A	A	B	B	A	A	B	A	A	A	X	B	B	A	H	A	A	B	A	A	B	B	B	A	A	A	A
Marker1775640	B	B	B	A	A	B	B	A	B	B	B	A	A	B	X	A	A	B	A	B	A	A	A	A	X	B	A	A	B	A	A	A	X	B	B	A	B	A	A	B	A	A	B	B	B	A	A	A	A
Marker1666474	B	B	B	A	A	B	B	A	B	B	B	A	A	B	X	A	A	B	A	B	A	A	A	A	B	B	A	A	B	A	A	A	B	B	B	A	B	A	A	B	A	A	B	B	B	A	A	A	A
Marker1754335	B	B	B	A	A	B	B	A	B	B	B	A	A	B	A	A	A	B	A	B	A	A	A	A	X	B	A	A	B	A	A	A	X	B	B	A	B	A	A	B	A	A	B	B	B	A	A	A	A
Marker1757162	B	B	B	A	A	B	B	A	B	B	B	A	A	B	X	A	A	B	A	B	A	A	A	A	B	B	A	A	X	A	A	A	X	B	B	A	B	A	A	B	A	A	B	B	B	A	A	A	A
Marker1719464	B	B	B	A	A	B	B	A	B	B	B	A	A	B	A	A	A	B	A	B	A	A	A	A	B	B	A	A	B	A	A	A	B	B	B	A	H	A	A	B	A	A	B	B	B	A	A	A	A
Marker1723818	B	B	B	A	A	B	B	A	B	B	B	A	A	B	X	A	A	B	A	B	A	A	A	A	X	B	A	A	X	A	A	A	B	B	B	A	X	A	A	B	A	A	B	B	B	A	A	A	A
Marker1754782	B	B	B	A	A	B	B	A	B	B	B	A	A	B	X	A	A	B	A	B	A	A	A	A	B	B	A	A	X	A	A	A	B	B	B	A	B	A	A	B	A	A	B	B	B	A	A	A	A
Marker1687881	B	B	B	A	A	B	B	A	B	B	B	A	A	B	A	A	A	B	A	B	A	A	A	A	X	B	A	A	B	A	A	A	X	B	B	A	B	A	A	B	A	A	B	B	B	A	A	A	A
Marker1698965	B	B	B	A	A	B	B	A	B	B	B	A	A	B	A	A	A	B	A	B	A	A	A	A	X	B	A	A	B	A	A	A	B	B	B	A	H	A	A	B	A	A	B	B	B	A	A	A	A
Marker1732235	B	B	B	A	A	B	B	A	B	B	B	A	A	B	X	A	A	B	A	B	A	A	A	A	B	B	A	A	B	A	A	A	X	B	B	A	B	A	A	B	A	A	X	B	B	A	A	A	A
Marker1775965	B	B	B	A	X	B	B	A	B	B	B	A	A	B	A	A	A	B	A	B	A	A	A	A	X	B	A	A	X	A	A	A	X	B	B	A	B	A	A	B	A	A	X	B	B	A	A	A	A
Marker1762009	B	B	B	A	A	B	B	A	B	B	B	A	A	B	A	A	A	B	A	B	A	A	A	A	X	B	A	A	B	A	A	A	X	B	B	A	B	A	A	B	A	A	B	B	B	A	A	A	A
Marker1771258	B	B	B	A	A	B	B	A	B	B	B	A	A	B	A	A	A	B	A	B	A	A	A	A	B	B	A	A	B	A	A	A	B	B	B	A	B	A	A	B	A	A	B	B	B	A	A	A	A
Marker1766333	B	B	B	A	A	B	B	A	B	B	B	A	A	B	A	A	A	B	A	B	A	A	A	A	B	B	A	A	B	A	A	A	B	B	B	A	H	A	A	B	A	A	B	B	B	A	A	A	A
Marker1735611	B	B	B	A	A	B	B	A	B	B	B	A	A	B	X	A	A	B	A	B	A	A	A	A	B	B	A	A	X	A	A	A	X	B	B	A	B	A	A	B	A	A	B	B	B	A	A	A	A
Marker1709981	B	B	B	A	X	B	B	A	B	B	B	A	A	B	X	A	A	B	A	B	A	A	A	A	B	B	A	A	X	A	A	A	X	B	B	A	X	A	A	B	A	A	X	B	B	A	A	A	A
Marker1757662	B	B	B	A	A	B	X	A	B	B	B	A	A	B	A	A	A	B	A	B	A	A	A	A	B	B	A	A	B	A	A	A	B	B	B	A	B	A	A	B	A	A	B	B	B	A	A	A	A
Marker1735589	B	B	B	A	A	B	B	A	B	B	B	A	X	B	X	A	A	B	A	B	A	A	A	A	X	B	A	A	X	A	A	A	B	B	B	A	H	A	A	B	A	A	B	B	B	A	A	A	A
Marker1731877	B	B	B	A	X	B	B	A	B	B	B	A	A	B	X	A	A	B	A	B	A	A	A	A	X	B	A	A	X	A	A	A	B	B	B	A	H	A	A	B	A	A	A	B	B	A	A	A	A
Marker1744144	B	B	B	A	B	B	A	A	B	B	B	A	B	B	A	A	A	B	B	B	A	A	A	A	X	B	A	A	X	A	A	A	B	B	B	A	H	A	A	B	A	A	A	B	B	A	A	A	A
Marker1761644	B	B	B	A	X	B	A	A	B	B	B	A	B	B	A	A	A	B	B	B	A	A	A	A	B	B	A	A	B	A	A	A	X	B	B	A	B	A	A	B	A	A	A	B	B	A	A	A	A
Marker1695106	B	B	B	A	B	B	A	A	B	B	B	A	B	B	A	A	A	B	B	B	A	A	A	A	B	B	A	A	B	A	A	A	B	B	B	A	B	A	A	B	A	A	A	B	B	A	A	A	A
Marker1695218	B	B	B	A	X	B	A	A	B	B	B	A	B	B	A	A	A	B	B	B	A	A	A	A	X	B	A	A	B	A	A	A	X	B	B	A	B	A	A	B	A	A	A	B	B	A	A	A	A
Marker1731763	B	B	B	A	B	B	A	A	B	B	B	A	B	B	A	A	A	B	B	B	A	A	A	A	X	B	A	A	B	A	A	A	B	B	B	A	B	A	A	B	A	A	A	B	B	A	A	A	A
Marker1716755	B	B	B	A	X	B	A	A	B	B	B	A	B	B	A	A	A	B	B	B	A	A	A	A	X	B	A	A	B	A	A	A	X	B	B	A	H	A	A	B	A	A	A	B	B	A	A	A	A
Marker1745089	B	B	B	A	B	B	A	A	B	B	B	A	B	B	A	A	A	B	B	B	A	A	A	A	B	B	A	A	B	A	A	A	B	B	B	A	H	A	A	B	A	A	A	B	B	A	A	A	A
Marker1668039	B	B	B	A	H	B	A	A	B	B	B	A	B	B	A	A	A	B	B	B	A	A	A	A	B	B	A	A	B	A	A	A	X	B	B	A	H	A	A	B	A	A	A	B	B	A	A	A	A
Marker1771202	B	B	B	A	B	B	A	A	B	B	B	A	B	B	A	A	A	B	B	B	A	A	A	A	X	B	A	A	B	A	A	A	B	B	B	A	H	A	A	B	A	A	A	B	B	A	A	A	A
Marker1697537	B	B	B	A	B	B	A	A	B	B	B	A	B	B	A	A	A	B	B	B	A	A	A	A	B	B	A	A	B	A	A	A	X	B	B	A	A	A	A	B	A	A	A	B	B	A	A	A	A
Marker1755235	B	B	B	A	X	B	A	A	B	B	B	A	B	B	A	A	A	B	B	B	A	A	A	A	X	B	A	A	X	A	A	A	X	B	B	A	A	A	A	B	A	A	A	B	B	A	A	A	A
Marker1766473	B	B	B	A	B	B	A	A	B	B	B	A	B	B	A	A	A	B	B	B	A	A	A	A	B	B	A	A	B	A	A	A	B	B	B	A	H	A	A	B	A	A	A	B	B	A	A	A	A
Marker1698106	B	B	B	A	B	B	A	A	B	B	B	A	B	B	A	A	A	B	B	B	A	A	A	A	B	B	A	A	B	A	A	A	B	B	B	A	H	A	A	B	A	A	A	B	B	A	A	A	A
Marker1706025	B	B	B	A	B	B	A	A	B	B	B	A	B	B	A	A	A	B	B	B	A	A	A	A	B	B	A	A	B	A	A	A	B	B	B	A	H	A	A	B	A	A	A	B	B	A	A	A	A
Marker1678469	B	B	B	A	B	B	A	A	B	B	B	A	B	B	A	A	A	B	B	B	A	A	A	A	B	B	A	A	B	A	A	A	B	B	B	A	H	A	A	B	A	A	A	B	B	A	A	A	A
Marker1763580	B	B	B	A	X	B	A	A	B	B	B	A	B	B	A	A	A	B	B	B	A	A	A	A	X	B	A	A	B	A	A	A	X	B	B	A	B	A	A	B	A	A	A	B	B	A	A	A	A
Marker1771974	B	B	B	A	X	B	A	A	B	B	B	A	B	B	A	A	A	B	B	B	A	A	A	A	B	B	A	A	B	A	A	A	B	B	B	A	B	A	A	B	A	A	A	B	B	A	A	A	A
Marker1678263	B	B	B	A	B	B	A	A	B	B	B	A	B	B	A	A	A	B	B	B	A	A	A	A	B	B	A	A	B	A	A	A	B	B	B	A	B	A	A	B	A	A	A	B	B	A	A	A	A
Marker1672553	B	B	B	A	B	B	A	A	B	B	B	A	B	B	A	A	A	B	B	B	A	A	A	A	B	B	A	A	B	A	A	A	X	B	B	A	B	A	A	B	A	A	A	B	B	A	A	A	A
Marker1736062	B	B	B	A	H	B	A	A	B	B	B	A	B	B	A	A	A	B	B	B	A	A	A	A	B	B	A	A	B	A	A	A	B	B	B	A	B	A	A	B	A	A	A	B	B	A	A	A	A
Marker1689447	B	B	B	A	X	B	A	A	B	B	B	A	B	B	A	A	A	B	B	B	A	A	A	A	B	B	A	A	B	A	A	A	X	B	B	A	B	A	A	B	A	A	A	B	B	A	A	A	A
Marker1682211	B	B	B	A	H	B	A	A	B	B	B	A	B	B	A	A	A	B	B	B	A	A	A	A	X	B	A	A	B	A	A	A	B	B	B	A	H	A	A	B	B	A	A	B	B	A	A	B	A
Marker1728353	B	B	B	A	H	B	A	A	B	B	B	A	B	B	A	A	A	B	B	B	A	A	A	A	B	B	A	A	A	A	A	A	X	A	B	A	H	A	A	B	B	A	A	B	B	A	A	B	A
Marker1675540	B	B	B	A	H	B	A	A	B	B	B	A	B	B	A	A	A	B	B	B	A	A	A	A	X	B	A	A	A	A	A	A	X	A	B	A	A	A	A	B	B	A	A	B	B	A	A	B	A
Marker1738185	B	B	B	A	B	B	A	A	B	B	B	A	B	B	A	A	A	B	B	B	A	A	A	A	X	B	A	A	A	A	A	A	B	A	B	A	A	A	A	B	B	A	A	B	B	A	A	B	A
Marker1762722	B	B	B	A	B	B	A	A	B	B	B	A	B	B	A	A	A	B	B	B	A	A	A	A	X	B	A	A	X	A	A	A	X	A	B	A	A	A	A	B	B	A	A	B	B	A	A	B	A
Marker1694238	B	B	B	A	B	B	A	A	B	B	B	A	B	B	A	A	A	B	B	B	A	A	A	A	B	B	A	A	A	A	A	A	B	A	B	A	H	A	A	B	B	A	A	B	B	A	A	B	A
Marker1771913	B	B	B	A	B	B	A	A	B	B	B	A	B	B	A	A	A	B	B	B	A	A	A	A	B	B	A	A	A	A	A	A	B	A	B	A	A	A	A	B	B	A	A	B	B	A	A	B	A
Marker1707574	B	B	B	A	B	B	A	A	B	B	B	A	B	B	A	A	A	B	B	B	A	A	A	A	X	B	A	A	A	A	A	A	B	A	B	A	H	A	A	B	B	A	A	B	B	A	A	B	A
Marker1776178	B	B	B	A	B	B	A	A	B	B	B	A	A	B	A	A	A	B	B	B	A	A	A	A	B	B	A	A	A	A	A	A	B	A	B	A	H	A	A	B	B	A	A	B	B	A	A	B	A
Marker1724958	B	B	B	A	B	B	A	A	B	B	B	A	A	B	A	A	A	B	B	B	A	A	A	A	B	B	A	A	A	A	A	A	B	A	B	A	A	A	X	B	B	A	A	B	B	A	A	B	A
Marker1778273	B	B	B	A	B	B	A	A	B	B	B	A	A	B	A	A	A	B	B	B	A	A	A	A	B	B	A	A	A	A	A	A	B	A	B	A	H	A	X	B	B	A	A	B	B	A	A	B	A
Marker1703376	B	B	B	A	B	B	A	A	B	B	B	A	A	B	A	A	A	B	B	B	A	A	X	A	X	B	A	A	A	A	A	A	X	A	B	A	H	A	A	B	B	A	A	B	X	A	A	B	A
[truncated: 6,078 more rows]
[truncated: 185 more columns]

## Sheet: Phenotype
WW_NS_2013	15.2333	16	15.8667	20.7333	19.4667	16.4667	19.4	19.4333	16.8167	19.4	14.8	17.4333	13.1778	18.4167	19.5889	18.9167	18.5	18.3056	14.9333	18	20.6667	15.1333	19.0222	20	18.4	15.9333	20	19.1333	17.8444	19.5667	19.9333	14.65	15.3444	19	19.1333	13.6	17.7	19.8222	18.1333	20.2667	17	15.8833	18.2667	18.1333	16.3	17.6667	18.4167	18.8667	18.2667
WW_NS_2014	16.2	14.4	15.8667	18.6667	17.9333	16.8	19.8667	16.4667	18.4	15.8	15.8667	16.2	14.7333	15.6667	18.4	19.8667	18	18	13.7333	18.6667	17.8	15.9333	17.8	16.3333	14.6	15.2667	18.2667	18.3333	17.2667	18.4	17.6667	14	15	17.4667	14.6667	13.2667	16.8	16.7333	14.8667	17.7	15.2	15	15.8667	17.7	16	14.9333	14.4	16.2	15.8
WW_NS_2015	15.5	15.2	14.5333	19.1333	15.1333	17.4667	18.3333	18.4667	18.1333	17.4	13.8667	15.9333	14.3333	19.7333	18.0667	16.2	18	18.1778	14.2667	16	18.5333	14.3333	16.6	16.9333	15.7333	18.8667	19	17.8	20.8	17.6	15.4667	16.2	16.4667	17.8	16.7333	15.2	18.2667	19.8667	16.8667	18.0667	17.8	14.6667	16.8	14.9333	15.4	16.3333	17.9	18.8667	18.4
WW_SW_2013	10.7139	16.6096	12.6682	10.792	11.604	12.7085	12.2715	11.9048	16.7583	11.282	14.0511	11.624	14.0658	13.1461	14.4358	12.5484	12.9397	10.9955	13.696	12.3956	12.8138	11.4591	10.2561	12.5024	9.90847	12.2511	11.1197	12.759	11.8299	12.1787	10.977	16.6058	15.5543	12.4341	12.4613	11.12	13.5051	12.8613	11.4171	10.7079	15.4739	13.804	14.8007	16.4568	13.9553	13.4666	13.2445	10.6919	11.8189
WW_SW_2014	9.07226	14.1766	12.0556	9.99139	11.5476	10.7744	12.7856	11.8024	14.6616	10.2628	12.5006	11.8839	12.4255	12.449	12.2231	11.2832	10.809	10.0075	12.3656	10.8196	11.9542	10.826	11.9901	11.0596	9.68967	9.94405	10.7391	12.1669	12.9377	11.483	11.1	14.144	12.2635	8.86631	10.7398	10.4644	13.0601	12.3033	11.4725	11.9017	13.6407	10.9907	15.276	11.6887	12.7198	10.1443	13.2082	11.0168	12.4296
WW_SW_2015	13.2568	12.9311	11.6804	11.3259	10.3146	12.5298	13.6173	13.7514	12.6418	11.4787	11.3342	11.8408	12.5965	10.841	13.8652	10.7668	10.5674	12.8608	11.7188	12.1768	14.2662	10.8502	11.626	10.773	9.81547	12.0878	13.1273	12.0971	14.193	11.7067	13.4573	11.7724	10.243	11.0909	12.969	12.1249	10.3014	12.5819	11.1317	13.6594	11.8831	13.0579	12.5309	11.9616	11.6989	10.6492	11.6223	10.6739	9.86589
WW_NS_BLUP	16.0608	15.7758	15.9226	18.6254	17.3034	16.9068	18.4198	17.7074	17.4834	17.3181	15.5407	16.6498	15.0364	17.5862	18.0795	17.8432	17.7367	17.7331	15.1882	17.4354	18.2876	15.7317	17.5841	17.465	16.4661	16.7599	18.2571	17.9057	18.0477	17.9718	17.4209	15.6105	16.0426	17.7264	16.8627	14.9972	17.3548	18.1603	16.7159	18.0783	16.7969	15.7647	16.9509	16.8703	16.2385	16.5102	16.7998	17.6119	17.2887
WW_SW_BLUP	11.7385	13.7828	12.3102	11.4453	11.7186	12.2314	12.7673	12.5225	13.8521	11.6295	12.6086	12.0977	12.8506	12.3166	13.1398	11.9466	11.8897	11.7986	12.5873	12.0906	12.8398	11.652	11.7937	11.8935	10.9025	11.883	11.9538	12.4348	12.825	12.1016	12.135	13.5421	12.6438	11.5322	12.2631	11.7675	12.4033	12.5805	11.8304	12.2814	13.2044	12.6019	13.5593	13.0909	12.7068	11.8785	12.6548	11.4875	11.8491
[truncated: 185 more columns]
