# Supplementary material for: Multi-environment QTL mapping identifies major genetic loci influencing soybean main stem node architecture
Source: PeerJ. 2024 Nov 26;12:e18539. doi: 10.7717/peerj.18539 (PMC11606317; doi:10.7717/peerj.18539)
Supplement: Supplemental Information 2 [file peerj-12-18539-s002.xlsx]

## Sheet: Sheet1
	CQ-GmActin	CQ-gene	△CT	2^-ΔCT
Zhonghuang 35-leaf-1	20.6056	36.9456	16.34	1.20555e-05
	20.8783	35.2345	14.3563	4.76797e-05
	20.7755	36.8436	16.0681	1.45557e-05
Zhonghuang 35-leaf-2	20.6056	26.4158	5.81013	0.0178228
	20.8783	26.4643	5.58603	0.0208179
	20.7755	26.6817	5.90615	0.0166752
Zhonghuang 35-leaf-3	20.6056	20.6311	0.025436	0.982524
	20.8783	20.8323	-0.0459239	1.03234
	20.7755	20.853	0.0774588	0.947726
Zhonghuang 35-leaf-4	20.6056	23.3558	2.7502	0.14863
	20.8783	23.667	2.78872	0.144714
	20.7755	23.7112	2.93569	0.130698
Zhonghuang 35-leaf-5	20.6056	23.6824	3.07678	0.118522
	20.8783	23.5967	2.71844	0.151938
	20.7755	23.7511	2.97558	0.127133
Zhonghuang 35-stem-1	19.8179	30.9937	11.1758	0.000432274
	19.9678	30.5499	10.5821	0.000652337
	19.8021	30.6831	10.881	0.000530276
Zhonghuang 35-stem-2	19.8179	25.0789	5.26102	0.0260781
	19.9678	25.4864	5.51858	0.0218144
	19.8021	25.0772	5.27504	0.0258259
Zhonghuang 35-stem-3	19.8179	19.9453	0.127443	0.915453
	19.9678	19.9938	0.0259634	0.982165
	19.8021	20.0093	0.207144	0.86625
Zhonghuang 35-stem-4	19.8179	22.5135	2.69557	0.154366
	19.9678	22.6305	2.66272	0.157922
	19.8021	22.6167	2.81455	0.142147
Zhonghuang 35-stem-5	19.8179	18.1114	-1.70646	3.26358
	19.9678	18.2011	-1.76668	3.40271
	19.8021	18.1561	-1.64605	3.12976
Zhonghuang 35-Nods-1	19.2874	33.2987	14.0113	6.05604e-05
	19.2817	32.0717	12.79	0.000141194
	19.3505	32.3219	12.9714	0.000124513
Zhonghuang 35-Nods-2	19.2874	26.4515	7.16411	0.0069725
	19.2817	26.2959	7.01425	0.00773569
	19.3505	26.4148	7.06435	0.00747171
Zhonghuang 35-Nods-3	19.2874	21.9915	2.70406	0.15346
	19.2817	21.9659	2.68425	0.155582
	19.3505	21.9695	2.61904	0.162776
Zhonghuang 35-Nods-4	19.2874	23.1632	3.87582	0.068118
	19.2817	23.2573	3.97568	0.0635626
	19.3505	23.2531	3.90256	0.0668669
Zhonghuang 35-Nods-5	19.2874	22.975	3.68759	0.0776115
	19.2817	22.926	3.64431	0.079975
	19.3505	22.9635	3.61305	0.0817265
Jindou 21-leaf-1	18.3098	34.3796	16.0698	1.45378e-05
	18.2624	36.8804	18.618	2.48551e-06
	18.236	NA	#VALUE!	#VALUE!
Jindou 21-leaf-2	18.3098	24.217	5.90725	0.0166625
	18.2624	24.102	5.83963	0.0174621
	18.236	24.0572	5.82123	0.0176863
Jindou 21-leaf-3	18.3098	19.9264	1.6166	0.326104
	18.2624	19.8563	1.5939	0.331274
	18.236	19.787	1.55107	0.341257
Jindou 21-leaf-4	18.3098	22.1931	3.88336	0.067763
	18.2624	22.1624	3.90006	0.0669832
	18.236	22.2628	4.02687	0.0613469
Jindou 21-leaf-5	18.3098	21.1616	2.85181	0.138522
	18.2624	21.1963	2.93392	0.130859
	18.236	21.2287	2.99276	0.125629
Jindou21-Stem-1	20.1855	35.06	14.8745	3.32915e-05
	20.2081	32.9561	12.7479	0.000145375
	20.1556	33.9248	13.7692	7.16256e-05
Jindou21-Stem-2	20.1855	25.5556	5.37013	0.0241786
	20.2081	25.5689	5.36079	0.0243356
	20.1556	25.5485	5.39294	0.0237993
Jindou21-Stem-3	20.1855	20.8772	0.691737	0.619108
	20.2081	20.8899	0.681758	0.623405
	20.1556	20.8659	0.710265	0.611208
Jindou21-Stem-4	20.1855	23.1835	2.99796	0.125177
	20.2081	23.1537	2.94558	0.129806
	20.1556	23.1469	2.99129	0.125757
Jindou21-Stem-5	20.1855	18.9532	-1.23229	2.3494
	20.2081	18.9272	-1.28093	2.42995
	20.1556	18.9896	-1.16597	2.24385
Jindou21- Nod -1	19.5939	31.1169	11.523	0.000339807
	19.587	31.3521	11.7651	0.000287312
	19.6175	31.6794	12.0619	0.000233883
Jindou21- Nod -2	19.5939	27.3557	7.76178	0.00460756
	19.587	26.3029	6.71586	0.00951317
	19.6175	26.5908	6.97335	0.00795818
Jindou21- Nod -3	19.5939	21.2768	1.68291	0.311454
	19.587	21.2864	1.69931	0.307933
	19.6175	21.1568	1.53933	0.344046
Jindou21- Nod -4	19.5939	0	-19.5939	791318
	19.587	23.1545	3.56747	0.0843496
	19.6175	23.2146	3.59714	0.0826328
Jindou21- Nod -5	19.5939	21.4513	1.85744	0.275966
	19.587	21.4234	1.83637	0.280026
	19.6175	21.3836	1.7661	0.294003
