# Supplementary material for: Multi-environment QTL mapping identifies major genetic loci influencing soybean main stem node architecture
Source: PeerJ. 2024 Nov 26;12:e18539. doi: 10.7717/peerj.18539 (PMC11606317; doi:10.7717/peerj.18539)
Supplement: Supplemental Information 3 [file peerj-12-18539-s003.xls]

## Sheet: Sheet1
ITEM TO CHECK	IMPORTANCE	CHECKLIST
EXPERIMENTAL DESIGN
Definition of experimental and control groups	E	L146
Number within each group	E	L147-149
Assay carried out by core lab or investigator's lab?	D	L146-154
Acknowledgement of authors' contributions	D	L330-342
SAMPLE
Description	E	L146-154
Volume/mass of sample processed	D	L146-154
Microdissection or macrodissection	E	L146-154
Processing procedure	E	L146-154
If frozen - how and how quickly?	E	L146-154
If fixed - with what, how quickly?	E	L146-154
Sample storage conditions and duration (especially for FFPE samples)	E	L146-154
NUCLEIC ACID EXTRACTION
Procedure and/or instrumentation	E	L146-154
Name of kit and details of any modifications	E	L146-154
Source of additional reagents used	D	L146-154
Details of DNase or RNAse treatment	E	L146-154
Contamination assessment (DNA or RNA)	E	L146-154
Nucleic acid quantification	E	L146-154
Instrument and method	E	L146-154
Purity (A260/A280)	D	L146-154
Yield	D	L146-154
RNA integrity method/instrument	E	L146-154
RIN/RQI or Cq of 3' and 5' transcripts	E	L146-154
Electrophoresis traces	D	L146-154
Inhibition testing (Cq dilutions, spike or other)	E	L146-154
REVERSE TRANSCRIPTION
Complete reaction conditions	E	L146-154
Amount of RNA and reaction volume	E	L146-154
Priming oligonucleotide (if using GSP) and concentration	E	TABLE 1
Reverse transcriptase and concentration	E	TABLE 1
Temperature and time	E	TABLE 1
Manufacturer of reagents and catalogue numbers	D	L146-154
Cqs with and without RT	D*	L146-154
Storage conditions of cDNA	D	L146-154
qPCR TARGET INFORMATION
If multiplex, efficiency and LOD of each assay.	E	X
Sequence accession number	E	X
Location of amplicon	D	X
Amplicon length	E	X
In silico specificity screen (BLAST, etc)	E	X
Pseudogenes, retropseudogenes or other homologs?	D	X
Sequence alignment	D	X
Secondary structure analysis of amplicon	D	X
Location of each primer by exon or intron (if applicable)	E	X
What splice variants are targeted?	E	X
qPCR OLIGONUCLEOTIDES
Primer sequences	E	TABLE 1
RTPrimerDB Identification Number	D	TABLE 1
Probe sequences	D**	X
Location and identity of any modifications	E	X
Manufacturer of oligonucleotides	D	X
Purification method	D	X
qPCR PROTOCOL
Complete reaction conditions	E	L146-154
Reaction volume and amount of cDNA/DNA	E	L146-154
Primer, (probe), Mg++ and dNTP concentrations	E	L146-154
Polymerase identity and concentration	E	L146-154
Buffer/kit identity and manufacturer	E	L146-154
Exact chemical constitution of the buffer	D	L146-154
Additives (SYBR Green I, DMSO, etc.)	E	L146-154
Manufacturer of plates/tubes and catalog number	D	L146-154
Complete thermocycling parameters	E	L146-154
Reaction setup (manual/robotic)	D	L146-154
Manufacturer of qPCR instrument	E	L146-154
qPCR VALIDATION
Evidence of optimisation (from gradients)	D	L146-154
Specificity (gel, sequence, melt, or digest)	E	L146-154
For SYBR Green I, Cq of the NTC	E	L146-154
Standard curves with slope and y-intercept	E	L146-154
PCR efficiency calculated from slope	E	L146-154
Confidence interval for PCR efficiency or standard error	D	L146-154
r2 of standard curve	E	L146-154
Linear dynamic range	E	L146-154
Cq variation at lower limit	E	L146-154
Confidence intervals throughout range	D	L146-154
Evidence for limit of detection	E	L146-154
If multiplex, efficiency and LOD of each assay.	E	L146-154
DATA ANALYSIS
qPCR analysis program (source, version)	E	L105-155
Cq method determination	E	L105-155
Outlier identification and disposition	E	L105-155
Results of NTCs	E	L105-155
Justification of number and choice of reference genes	E	L105-155
Description of normalisation method	E	L105-155
Number and concordance of biological replicates	D	L105-155
Number and stage (RT or qPCR) of technical replicates	E	L105-155
Repeatability (intra-assay variation)	E	L105-155
Reproducibility (inter-assay variation, %CV)	D	L105-155
Power analysis	D	L105-155
Statistical methods for result significance	E	L105-155
Software (source, version)	E	L105-155
Cq or raw data submission using RDML	D	L105-155
Table 1. MIQE checklist for authors, reviewers and editors. All essential information (E) must be submitted with the manuscript. Desirable
information (D) should be submitted if available. If using primers obtained from RTPrimerDB, information on qPCR target, oligonucleotides,
protocols and validation is available from that source.
*: Assessing the absence of DNA using a no RT assay is essential when first extracting RNA. Once the sample has been validated as
RDNA-free, inclusion of a no-RT control is desirable, but no longer essential.
**: Disclosure of the probe sequence is highly desirable and strongly encouraged. However, since not all commercial pre-designed assay
vendors provide this information, it cannot be an essential requirement. Use of such assays is advised against.
